# Supplementary material for: A divergent cyclin/cyclin-dependent kinase complex controls the atypical replication of a malaria parasite during gametogony and transmission
Source: bioRxiv preprint, doi:10.1101/2020.02.14.928432, version 2 (2020-06-06)
Supplement: Supplementary file 3 [file 928432_file12.xlsx]

## Sheet: All
Sequence	Modifications	# PSMs	Master Protein Accessions	Protein Name	Protein Description	# Missed Cleavages	Abundance Ratio (log2): (0, KO) / (0, WT)	Abundance Ratio (log2): (15, KO) / (15, WT)	Abundance Ratio (log2): (30, KO) / (30, WT)	Abundance Ratio (log2): (45, KO) / (45, WT)	Abundance Ratio (log2): (60, KO) / (60, WT)	Abundance Ratio Adj. P-Value: (0, KO) / (0, WT)	Abundance Ratio Adj. P-Value: (15, KO) / (15, WT)	Abundance Ratio Adj. P-Value: (30, KO) / (30, WT)	Abundance Ratio Adj. P-Value: (45, KO) / (45, WT)	Abundance Ratio Adj. P-Value: (60, KO) / (60, WT)	Quan Info	Ions Score (by Search Engine): Mascot
TFSTLPPHMENLMSLK	1xTMT6plex [K16]; 1xTMT6plex [N-Term]; 2xPhospho [S3(99.5); S14(100)]	2	PBANKA_0100700		Plasmodium exported protein, unknown function	0	0.04	0.5	0.8	0.49	0.35	1	1	0.413599	1	1		63
	Annotated Sequence	# Proteins	Master Protein Accessions			Protein Accessions	# Missed Cleavages	Ions Score	ptmRS: Best Site Probabilities
	tFStLPPHMENLMsLk	1	PBANKA_0100700		Plasmodium exported protein, unknown function	PBANKA_0100700.1-p1	0	63	S3(Phospho): 99.53; S14(Phospho): 100
	tFStLPPHMENLMsLk	1	PBANKA_0100700		Plasmodium exported protein, unknown function	PBANKA_0100700.1-p1	0	49	S3(Phospho): 99.5; S14(Phospho): 100
EMLSNDLSNNDEIDEEKR	1xTMT6plex [K17]; 1xTMT6plex [N-Term]; 1xPhospho [S4(100)]	4	PBANKA_0100700		Plasmodium exported protein, unknown function	1	0.09	0.12	0.3	0.13	0.23	1	1	1	1	1		39
	Annotated Sequence	# Proteins	Master Protein Accessions			Protein Accessions	# Missed Cleavages	Ions Score	ptmRS: Best Site Probabilities
	eMLsNDLSNNDEIDEEkR	1	PBANKA_0100700		Plasmodium exported protein, unknown function	PBANKA_0100700.1-p1	1	39	S4(Phospho): 100
	eMLsNDLSNNDEIDEEkR	1	PBANKA_0100700		Plasmodium exported protein, unknown function	PBANKA_0100700.1-p1	1	38	S4(Phospho): 100
	eMLsNDLSNNDEIDEEkR	1	PBANKA_0100700		Plasmodium exported protein, unknown function	PBANKA_0100700.1-p1	1	36	S4(Phospho): 100
	eMLsNDLSNNDEIDEEkR	1	PBANKA_0100700		Plasmodium exported protein, unknown function	PBANKA_0100700.1-p1	1	33	S4(Phospho): 100
EMLSNDLSNNDEIDEEKR	1xOxidation [M2]; 1xTMT6plex [K17]; 1xTMT6plex [N-Term]; 1xPhospho [S4(100)]	7	PBANKA_0100700		Plasmodium exported protein, unknown function	1	-0.09	0.09	0.03	0.05	0.07	1	1	1	1	1		40
	Annotated Sequence	# Proteins	Master Protein Accessions			Protein Accessions	# Missed Cleavages	Ions Score	ptmRS: Best Site Probabilities
	emLsNDLSNNDEIDEEkR	1	PBANKA_0100700		Plasmodium exported protein, unknown function	PBANKA_0100700.1-p1	1	40	S4(Phospho): 100
	emLsNDLSNNDEIDEEkR	1	PBANKA_0100700		Plasmodium exported protein, unknown function	PBANKA_0100700.1-p1	1	33	S4(Phospho): 100
	emLsNDLSNNDEIDEEkR	1	PBANKA_0100700		Plasmodium exported protein, unknown function	PBANKA_0100700.1-p1	1	28	S4(Phospho): 100
	emLsNDLSNNDEIDEEkR	1	PBANKA_0100700		Plasmodium exported protein, unknown function	PBANKA_0100700.1-p1	1	26	S4(Phospho): 100
	emLsNDLSNNDEIDEEkR	1	PBANKA_0100700		Plasmodium exported protein, unknown function	PBANKA_0100700.1-p1	1	26	S4(Phospho): 100
	emLsNDLSNNDEIDEEkR	1	PBANKA_0100700		Plasmodium exported protein, unknown function	PBANKA_0100700.1-p1	1	21	S4(Phospho): 100
	emLsNDLSNNDEIDEEkR	1	PBANKA_0100700		Plasmodium exported protein, unknown function	PBANKA_0100700.1-p1	1	14	S4(Phospho): 99.99
TFSTLPPHMENLMSLK	1xTMT6plex [K16]; 1xTMT6plex [N-Term]; 1xPhospho [S3(99.7)]	4	PBANKA_0100700		Plasmodium exported protein, unknown function	0	-0.08	0.26	0.27	0.26	0.17	1	1	1	1	1		61
	Annotated Sequence	# Proteins	Master Protein Accessions			Protein Accessions	# Missed Cleavages	Ions Score	ptmRS: Best Site Probabilities
	tFsTLPPHMENLMSLk	1	PBANKA_0100700		Plasmodium exported protein, unknown function	PBANKA_0100700.1-p1	0	61	S3(Phospho): 99.68
	tFSTLPPHMENLMsLk	1	PBANKA_0100700		Plasmodium exported protein, unknown function	PBANKA_0100700.1-p1	0	55	S14(Phospho): 100
	tFsTLPPHMENLMSLk	1	PBANKA_0100700		Plasmodium exported protein, unknown function	PBANKA_0100700.1-p1	0	54	S3(Phospho): 99.59
	tFSTLPPHMENLMsLk	1	PBANKA_0100700		Plasmodium exported protein, unknown function	PBANKA_0100700.1-p1	0	49	S14(Phospho): 100
YNTLETNYR	1xTMT6plex [N-Term]; 1xPhospho [T3(100)]	2	PBANKA_0100800		zinc finger protein, putative	0	0.22	0.23	0.17	0.1	-0.02	1	1	1	1	1		25
	Annotated Sequence	# Proteins	Master Protein Accessions			Protein Accessions	# Missed Cleavages	Ions Score	ptmRS: Best Site Probabilities
	yNtLETNYR	1	PBANKA_0100800		zinc finger protein, putative	PBANKA_0100800.1-p1	0	25	T3(Phospho): 100
	yNtLETNYR	1	PBANKA_0100800		zinc finger protein, putative	PBANKA_0100800.1-p1	0	25	T3(Phospho): 100
INTEYIFNNVNNIK	1xTMT6plex [K14]; 1xTMT6plex [N-Term]; 1xPhospho [T3(100)]	1	PBANKA_0100800		zinc finger protein, putative	0	0.11	0	-0.21	0.09	-0.28							23
	Annotated Sequence	# Proteins	Master Protein Accessions			Protein Accessions	# Missed Cleavages	Ions Score	ptmRS: Best Site Probabilities
	iNtEYIFNNVNNIk	1	PBANKA_0100800		zinc finger protein, putative	PBANKA_0100800.1-p1	0	23	T3(Phospho): 100
KYSDVLGENIINGNEWNNTIK	2xTMT6plex [K1; K21]; 1xTMT6plex [N-Term]; 1xPhospho [S3(100)]	4	PBANKA_0100800		zinc finger protein, putative	1	-0.11	-0.24	-0.26	-0.27	-0.18	1	1	1	1	1		73
	Annotated Sequence	# Proteins	Master Protein Accessions			Protein Accessions	# Missed Cleavages	Ions Score	ptmRS: Best Site Probabilities
	kYsDVLGENIINGNEWNNTIk	1	PBANKA_0100800		zinc finger protein, putative	PBANKA_0100800.1-p1	1	73	S3(Phospho): 100
	kYsDVLGENIINGNEWNNTIk	1	PBANKA_0100800		zinc finger protein, putative	PBANKA_0100800.1-p1	1	60	S3(Phospho): 100
	kYsDVLGENIINGNEWNNTIk	1	PBANKA_0100800		zinc finger protein, putative	PBANKA_0100800.1-p1	1	51	S3(Phospho): 100
	kYsDVLGENIINGNEWNNTIk	1	PBANKA_0100800		zinc finger protein, putative	PBANKA_0100800.1-p1	1	34	S3(Phospho): 100
DFPNLDNCKTFDNFNFDDTIK	1xCarbamidomethyl [C8]; 2xTMT6plex [K9; K21]; 1xTMT6plex [N-Term]; 1xPhospho [T10(100)]	1	PBANKA_0100800		zinc finger protein, putative	1											No Quan Values	36
	Annotated Sequence	# Proteins	Master Protein Accessions			Protein Accessions	# Missed Cleavages	Ions Score	ptmRS: Best Site Probabilities
	dFPNLDNcktFDNFNFDDTIk	1	PBANKA_0100800		zinc finger protein, putative	PBANKA_0100800.1-p1	1	36	T10(Phospho): 100
NSSDINYINSKDNLFVFK	2xTMT6plex [K11; K18]; 1xTMT6plex [N-Term]; 1xPhospho [S10(100)]	3	PBANKA_0100800		zinc finger protein, putative	1	0.17	0.21	0.45	0.03	0.3	1	1	1	1	1		39
	Annotated Sequence	# Proteins	Master Protein Accessions			Protein Accessions	# Missed Cleavages	Ions Score	ptmRS: Best Site Probabilities
	nSSDINYINskDNLFVFk	1	PBANKA_0100800		zinc finger protein, putative	PBANKA_0100800.1-p1	1	39	S10(Phospho): 100
	nSSDINYINskDNLFVFk	1	PBANKA_0100800		zinc finger protein, putative	PBANKA_0100800.1-p1	1	37	S10(Phospho): 100
	nSSDINYINskDNLFVFk	1	PBANKA_0100800		zinc finger protein, putative	PBANKA_0100800.1-p1	1	27	S10(Phospho): 100
SMNSALFQYSSSIFNNAWSK	1xTMT6plex [K20]; 1xTMT6plex [N-Term]; 2xPhospho [S4(100); Y/S]	1	PBANKA_0100800		zinc finger protein, putative	0	-0.3	-0.16	0.04	-0.4	0.12							27
	Annotated Sequence	# Proteins	Master Protein Accessions			Protein Accessions	# Missed Cleavages	Ions Score	ptmRS: Best Site Probabilities
	sMNsALFQYSSsIFNNAWSk	1	PBANKA_0100800		zinc finger protein, putative	PBANKA_0100800.1-p1	0	27	S4(Phospho): 100; Y9(Phospho): 25; S10(Phospho): 25; S11(Phospho): 25; S12(Phospho): 25
ELEENNEAEDNEIKGDAGVNTGNILGSGNSTK	2xTMT6plex [K14; K32]; 1xTMT6plex [N-Term]; 1xPhospho [S/T]	2	PBANKA_0100800		zinc finger protein, putative	1	0.18	-0.11	-0.1	0.04	-0.04							54
	Annotated Sequence	# Proteins	Master Protein Accessions			Protein Accessions	# Missed Cleavages	Ions Score	ptmRS: Best Site Probabilities
	eLEENNEAEDNEIkGDAGVNTGNILGSGNsTk	1	PBANKA_0100800		zinc finger protein, putative	PBANKA_0100800.1-p1	1	54	S30(Phospho): 50; T31(Phospho): 50
	eLEENNEAEDNEIkGDAGVNTGNILGSGNsTk	1	PBANKA_0100800		zinc finger protein, putative	PBANKA_0100800.1-p1	1	37	S30(Phospho): 50; T31(Phospho): 50
ILSCVSK	1xCarbamidomethyl [C4]; 1xTMT6plex [K7]; 1xTMT6plex [N-Term]; 1xPhospho [S6(100)]	2	PBANKA_0100800		zinc finger protein, putative	0	-0.23	0.17	0.11	0.09	-0.13	1	1	1	1	1		26
	Annotated Sequence	# Proteins	Master Protein Accessions			Protein Accessions	# Missed Cleavages	Ions Score	ptmRS: Best Site Probabilities
	iLScVsk	1	PBANKA_0100800		zinc finger protein, putative	PBANKA_0100800.1-p1	0	26	S6(Phospho): 100
	iLScVsk	1	PBANKA_0100800		zinc finger protein, putative	PBANKA_0100800.1-p1	0	23	S6(Phospho): 100
TMDSIFK	1xTMT6plex [K7]; 1xTMT6plex [N-Term]; 1xPhospho [S4(100)]	1	PBANKA_0100800		zinc finger protein, putative	0	-0.02	-0.25	0.32	-0.37	-0.04							16
	Annotated Sequence	# Proteins	Master Protein Accessions			Protein Accessions	# Missed Cleavages	Ions Score	ptmRS: Best Site Probabilities
	tMDsIFk	1	PBANKA_0100800		zinc finger protein, putative	PBANKA_0100800.1-p1	0	16	S4(Phospho): 100
SMNSALFQYSSSIFNNAWSK	1xTMT6plex [K20]; 1xTMT6plex [N-Term]; 1xPhospho [S4(100)]	2	PBANKA_0100800		zinc finger protein, putative	0	-0.45	-0.24	-0.2	-0.58	-0.37							44
	Annotated Sequence	# Proteins	Master Protein Accessions			Protein Accessions	# Missed Cleavages	Ions Score	ptmRS: Best Site Probabilities
	sMNsALFQYSSSIFNNAWSk	1	PBANKA_0100800		zinc finger protein, putative	PBANKA_0100800.1-p1	0	44	S4(Phospho): 100
	sMNSALFQYSSsIFNNAWSk	1	PBANKA_0100800		zinc finger protein, putative	PBANKA_0100800.1-p1	0	43	S10(Phospho): 33.33; S11(Phospho): 33.33; S12(Phospho): 33.33
NNTDVLCPNTPSNNNLFK	1xCarbamidomethyl [C7]; 1xTMT6plex [K18]; 1xTMT6plex [N-Term]; 1xPhospho [S12(100)]	1	PBANKA_0100800		zinc finger protein, putative	0	0.06	-0.25	-0.14	-0.06	-0.13							40
	Annotated Sequence	# Proteins	Master Protein Accessions			Protein Accessions	# Missed Cleavages	Ions Score	ptmRS: Best Site Probabilities
	nNTDVLcPNTPsNNNLFk	1	PBANKA_0100800		zinc finger protein, putative	PBANKA_0100800.1-p1	0	40	S12(Phospho): 100
TISQPLNK	1xTMT6plex [K8]; 1xTMT6plex [N-Term]; 1xPhospho [S3(100)]	4	PBANKA_0102300	CAX	cation/H+ antiporter	0	-0.22	-0.37	-0.21	-0.42	-0.26	1	1	1	1	1		24
	Annotated Sequence	# Proteins	Master Protein Accessions			Protein Accessions	# Missed Cleavages	Ions Score	ptmRS: Best Site Probabilities
	tIsQPLNk	1	PBANKA_0102300	CAX	cation/H+ antiporter	PBANKA_0102300.1-p1	0	24	S3(Phospho): 100
	tIsQPLNk	1	PBANKA_0102300	CAX	cation/H+ antiporter	PBANKA_0102300.1-p1	0	21	S3(Phospho): 100
	tIsQPLNk	1	PBANKA_0102300	CAX	cation/H+ antiporter	PBANKA_0102300.1-p1	0	21	S3(Phospho): 100
	tIsQPLNk	1	PBANKA_0102300	CAX	cation/H+ antiporter	PBANKA_0102300.1-p1	0	16	S3(Phospho): 100
RTISQPLNK	1xTMT6plex [K9]; 1xTMT6plex [N-Term]; 1xPhospho [S4(100)]	3	PBANKA_0102300	CAX	cation/H+ antiporter	1	-0.2	-0.35	-0.12	-0.21	-0.05	1	1	1	1	1		31
	Annotated Sequence	# Proteins	Master Protein Accessions			Protein Accessions	# Missed Cleavages	Ions Score	ptmRS: Best Site Probabilities
	rTIsQPLNk	1	PBANKA_0102300	CAX	cation/H+ antiporter	PBANKA_0102300.1-p1	1	31	S4(Phospho): 100
	rTIsQPLNk	1	PBANKA_0102300	CAX	cation/H+ antiporter	PBANKA_0102300.1-p1	1	28	S4(Phospho): 100
	rTIsQPLNk	1	PBANKA_0102300	CAX	cation/H+ antiporter	PBANKA_0102300.1-p1	1	24	S4(Phospho): 100
NDSDNFFANIGK	1xTMT6plex [K12]; 1xTMT6plex [N-Term]; 1xPhospho [S3(100)]	1	PBANKA_0102700		conserved Plasmodium protein, unknown function	0	-0.22	-0.27	-0.37	-0.14	0.07							38
	Annotated Sequence	# Proteins	Master Protein Accessions			Protein Accessions	# Missed Cleavages	Ions Score	ptmRS: Best Site Probabilities
	nDsDNFFANIGk	1	PBANKA_0102700		conserved Plasmodium protein, unknown function	PBANKA_0102700.1-p1	0	38	S3(Phospho): 100
MSDISPFIL	1xTMT6plex [N-Term]; 1xPhospho [S2(100)]	4	PBANKA_0102700		conserved Plasmodium protein, unknown function	0	0.28	0.85	0.53	0.66	0.52	1	0.247196	1	0.900512	1		33
	Annotated Sequence	# Proteins	Master Protein Accessions			Protein Accessions	# Missed Cleavages	Ions Score	ptmRS: Best Site Probabilities
	mSDIsPFIL	1	PBANKA_0102700		conserved Plasmodium protein, unknown function	PBANKA_0102700.1-p1	0	33	S5(Phospho): 99.6
	msDISPFIL	1	PBANKA_0102700		conserved Plasmodium protein, unknown function	PBANKA_0102700.1-p1	0	32	S2(Phospho): 100
	mSDIsPFIL	1	PBANKA_0102700		conserved Plasmodium protein, unknown function	PBANKA_0102700.1-p1	0	31	S5(Phospho): 100
	msDISPFIL	1	PBANKA_0102700		conserved Plasmodium protein, unknown function	PBANKA_0102700.1-p1	0	26	S2(Phospho): 100
QKNSYPSTR	1xTMT6plex [K2]; 1xTMT6plex [N-Term]; 1xPhospho [S4(100)]	2	PBANKA_0102700		conserved Plasmodium protein, unknown function	1	0.13	-0.12	-0.18	-0.1	0.14	1	1	1	1	1		17
	Annotated Sequence	# Proteins	Master Protein Accessions			Protein Accessions	# Missed Cleavages	Ions Score	ptmRS: Best Site Probabilities
	qkNsYPSTR	1	PBANKA_0102700		conserved Plasmodium protein, unknown function	PBANKA_0102700.1-p1	1	17	S4(Phospho): 100
	qkNsYPSTR	1	PBANKA_0102700		conserved Plasmodium protein, unknown function	PBANKA_0102700.1-p1	1	16	S4(Phospho): 100
MSDISPFIL	1xOxidation [M1]; 1xTMT6plex [N-Term]; 1xPhospho [S5(100)]	2	PBANKA_0102700		conserved Plasmodium protein, unknown function	0	-0.38	0.5	0	0.16	0.12	1	1	1	1	1		28
	Annotated Sequence	# Proteins	Master Protein Accessions			Protein Accessions	# Missed Cleavages	Ions Score	ptmRS: Best Site Probabilities
	mSDIsPFIL	1	PBANKA_0102700		conserved Plasmodium protein, unknown function	PBANKA_0102700.1-p1	0	28	S5(Phospho): 100
	mSDIsPFIL	1	PBANKA_0102700		conserved Plasmodium protein, unknown function	PBANKA_0102700.1-p1	0	24	S5(Phospho): 100
EQESFNLK	1xTMT6plex [K8]; 1xTMT6plex [N-Term]; 1xPhospho [S4(100)]	4	PBANKA_0102700		conserved Plasmodium protein, unknown function	0	0.43	0.45	0.59	0.44	0.48	1	1	1	1	1		37
	Annotated Sequence	# Proteins	Master Protein Accessions			Protein Accessions	# Missed Cleavages	Ions Score	ptmRS: Best Site Probabilities
	eQEsFNLk	1	PBANKA_0102700		conserved Plasmodium protein, unknown function	PBANKA_0102700.1-p1	0	37	S4(Phospho): 100
	eQEsFNLk	1	PBANKA_0102700		conserved Plasmodium protein, unknown function	PBANKA_0102700.1-p1	0	31	S4(Phospho): 100
	eQEsFNLk	1	PBANKA_0102700		conserved Plasmodium protein, unknown function	PBANKA_0102700.1-p1	0	29	S4(Phospho): 100
	eQEsFNLk	1	PBANKA_0102700		conserved Plasmodium protein, unknown function	PBANKA_0102700.1-p1	0	29	S4(Phospho): 100
NSYPSTR	1xTMT6plex [N-Term]; 1xPhospho [S2(100)]	4	PBANKA_0102700		conserved Plasmodium protein, unknown function	0	0.05	0.04	-0.22	-0.06	0.01	1	1	1	1	1		22
	Annotated Sequence	# Proteins	Master Protein Accessions			Protein Accessions	# Missed Cleavages	Ions Score	ptmRS: Best Site Probabilities
	nsYPSTR	1	PBANKA_0102700		conserved Plasmodium protein, unknown function	PBANKA_0102700.1-p1	0	22	S2(Phospho): 100
	nsYPSTR	1	PBANKA_0102700		conserved Plasmodium protein, unknown function	PBANKA_0102700.1-p1	0	20	S2(Phospho): 100
	nSYPsTR	1	PBANKA_0102700		conserved Plasmodium protein, unknown function	PBANKA_0102700.1-p1	0	19	S5(Phospho): 100
	nSYPsTR	1	PBANKA_0102700		conserved Plasmodium protein, unknown function	PBANKA_0102700.1-p1	0	14	S5(Phospho): 100
GVEKNDSDNFFANIGK	2xTMT6plex [K4; K16]; 1xTMT6plex [N-Term]; 1xPhospho [S7(100)]	1	PBANKA_0102700		conserved Plasmodium protein, unknown function	1	0.13	-0.31	-0.28	0	-0.07							33
	Annotated Sequence	# Proteins	Master Protein Accessions			Protein Accessions	# Missed Cleavages	Ions Score	ptmRS: Best Site Probabilities
	gVEkNDsDNFFANIGk	1	PBANKA_0102700		conserved Plasmodium protein, unknown function	PBANKA_0102700.1-p1	1	33	S7(Phospho): 100
QNVESENMVENDQGMANELLQK	1xTMT6plex [K22]; 1xTMT6plex [N-Term]; 1xPhospho [S5(100)]	1	PBANKA_0102700		conserved Plasmodium protein, unknown function	0											No Quan Values	69
	Annotated Sequence	# Proteins	Master Protein Accessions			Protein Accessions	# Missed Cleavages	Ions Score	ptmRS: Best Site Probabilities
	qNVEsENMVENDQGMANELLQk	1	PBANKA_0102700		conserved Plasmodium protein, unknown function	PBANKA_0102700.1-p1	0	69	S5(Phospho): 100
NENINNIASMNDDCTKESISIK	1xCarbamidomethyl [C14]; 2xTMT6plex [K16; K22]; 1xTMT6plex [N-Term]; 1xPhospho [S9(100)]	1	PBANKA_0102700		conserved Plasmodium protein, unknown function	1	0.23	0.01	0.11	0.12	0.07							38
	Annotated Sequence	# Proteins	Master Protein Accessions			Protein Accessions	# Missed Cleavages	Ions Score	ptmRS: Best Site Probabilities
	nENINNIAsMNDDcTkESISIk	1	PBANKA_0102700		conserved Plasmodium protein, unknown function	PBANKA_0102700.1-p1	1	38	S9(Phospho): 100
YIDENFLSLINESK	1xTMT6plex [K14]; 1xTMT6plex [N-Term]; 1xPhospho [S8(100)]	2	PBANKA_0102700		conserved Plasmodium protein, unknown function	0	0.49	0.66	0.89	0.59	0.48	1	1	1	1	1		54
	Annotated Sequence	# Proteins	Master Protein Accessions			Protein Accessions	# Missed Cleavages	Ions Score	ptmRS: Best Site Probabilities
	yIDENFLsLINESk	1	PBANKA_0102700		conserved Plasmodium protein, unknown function	PBANKA_0102700.1-p1	0	54	S8(Phospho): 100
	yIDENFLsLINESk	1	PBANKA_0102700		conserved Plasmodium protein, unknown function	PBANKA_0102700.1-p1	0	44	S8(Phospho): 100
QKNSYPSTR	1xTMT6plex [K2]; 1xTMT6plex [N-Term]; 2xPhospho [S4(100); S7(99.6)]	1	PBANKA_0102700		conserved Plasmodium protein, unknown function	1	0.28	0.42	0.21	0.44	-0.04							14
	Annotated Sequence	# Proteins	Master Protein Accessions			Protein Accessions	# Missed Cleavages	Ions Score	ptmRS: Best Site Probabilities
	qkNsYPsTR	1	PBANKA_0102700		conserved Plasmodium protein, unknown function	PBANKA_0102700.1-p1	1	14	S4(Phospho): 100; S7(Phospho): 99.56
TNSEKHSNEITLTQNDLK	2xTMT6plex [K5; K18]; 1xTMT6plex [N-Term]; 1xPhospho [S/T]	1	PBANKA_0103300		conserved Plasmodium protein, unknown function	1	-0.1	-0.49	-0.53	-0.2	-0.28							26
	Annotated Sequence	# Proteins	Master Protein Accessions			Protein Accessions	# Missed Cleavages	Ions Score	ptmRS: Best Site Probabilities
	tNSEkHsNEITLTQNDLk	1	PBANKA_0103300		conserved Plasmodium protein, unknown function	PBANKA_0103300.1-p1	1	26	S3(Phospho): 49.85; S7(Phospho): 49.85
GGSIGLIGGIGINTFSQNELNNNNNNNNNEFLK	1xTMT6plex [K33]; 1xTMT6plex [N-Term]; 1xPhospho [S3(100)]	1	PBANKA_0103300		conserved Plasmodium protein, unknown function	0	-0.12	-0.04	-0.18	-0.31	-0.48							22
	Annotated Sequence	# Proteins	Master Protein Accessions			Protein Accessions	# Missed Cleavages	Ions Score	ptmRS: Best Site Probabilities
	gGsIGLIGGIGINTFSQNELNNNNNNNNNEFLk	1	PBANKA_0103300		conserved Plasmodium protein, unknown function	PBANKA_0103300.1-p1	0	22	S3(Phospho): 100
IKNSLENINPR	1xTMT6plex [K2]; 1xTMT6plex [N-Term]; 1xPhospho [S4(100)]	2	PBANKA_0103300		conserved Plasmodium protein, unknown function	1	0.24	0.28	0.29	0.16	0.22	1	1	1	1	1		17
	Annotated Sequence	# Proteins	Master Protein Accessions			Protein Accessions	# Missed Cleavages	Ions Score	ptmRS: Best Site Probabilities
	ikNsLENINPR	1	PBANKA_0103300		conserved Plasmodium protein, unknown function	PBANKA_0103300.1-p1	1	17	S4(Phospho): 100
	ikNsLENINPR	1	PBANKA_0103300		conserved Plasmodium protein, unknown function	PBANKA_0103300.1-p1	1	15	S4(Phospho): 100
LSNSNNSEDNNQINDISR	1xTMT6plex [N-Term]; 1xPhospho [S7(100)]	3	PBANKA_0103300		conserved Plasmodium protein, unknown function	0	-0.24	0	-0.08	-0.2	-0.04	1	1	1	1	1		76
	Annotated Sequence	# Proteins	Master Protein Accessions			Protein Accessions	# Missed Cleavages	Ions Score	ptmRS: Best Site Probabilities
	lSNSNNsEDNNQINDISR	1	PBANKA_0103300		conserved Plasmodium protein, unknown function	PBANKA_0103300.1-p1	0	76	S7(Phospho): 100
	lSNSNNsEDNNQINDISR	1	PBANKA_0103300		conserved Plasmodium protein, unknown function	PBANKA_0103300.1-p1	0	70	S7(Phospho): 100
	lSNSNNsEDNNQINDISR	1	PBANKA_0103300		conserved Plasmodium protein, unknown function	PBANKA_0103300.1-p1	0	23	S7(Phospho): 100
LNESFDSNNALNSINKR	1xTMT6plex [K16]; 1xTMT6plex [N-Term]; 1xPhospho [S4(100)]	1	PBANKA_0103300		conserved Plasmodium protein, unknown function	1											No Quan Values	27
	Annotated Sequence	# Proteins	Master Protein Accessions			Protein Accessions	# Missed Cleavages	Ions Score	ptmRS: Best Site Probabilities
	lNEsFDSNNALNSINkR	1	PBANKA_0103300		conserved Plasmodium protein, unknown function	PBANKA_0103300.1-p1	1	27	S4(Phospho): 100
QLTSLCKLPLDESLLNFLK	1xCarbamidomethyl [C6]; 2xTMT6plex [K7; K19]; 1xTMT6plex [N-Term]; 1xPhospho [S4(99.6)]	4	PBANKA_0103300		conserved Plasmodium protein, unknown function	1	0.57	0.9	0.97	0.75	0.88	1	1	1	1	1		38
	Annotated Sequence	# Proteins	Master Protein Accessions			Protein Accessions	# Missed Cleavages	Ions Score	ptmRS: Best Site Probabilities
	qLTsLckLPLDESLLNFLk	1	PBANKA_0103300		conserved Plasmodium protein, unknown function	PBANKA_0103300.1-p1	1	38	S4(Phospho): 99.43
	qLTsLckLPLDESLLNFLk	1	PBANKA_0103300		conserved Plasmodium protein, unknown function	PBANKA_0103300.1-p1	1	34	T3(Phospho): 99.46
	qLTsLckLPLDESLLNFLk	1	PBANKA_0103300		conserved Plasmodium protein, unknown function	PBANKA_0103300.1-p1	1	17	S4(Phospho): 99.54
	qLTsLckLPLDESLLNFLk	1	PBANKA_0103300		conserved Plasmodium protein, unknown function	PBANKA_0103300.1-p1	1	15	S4(Phospho): 99.55
NIDSDNLNALVSEK	1xTMT6plex [K14]; 1xTMT6plex [N-Term]; 1xPhospho [S4(100)]	2	PBANKA_0103300		conserved Plasmodium protein, unknown function	0	0.26	-0.43	0.1	-0.33	-0.07							30
	Annotated Sequence	# Proteins	Master Protein Accessions			Protein Accessions	# Missed Cleavages	Ions Score	ptmRS: Best Site Probabilities
	nIDsDNLNALVSEk	1	PBANKA_0103300		conserved Plasmodium protein, unknown function	PBANKA_0103300.1-p1	0	30	S4(Phospho): 100
	nIDsDNLNALVSEk	1	PBANKA_0103300		conserved Plasmodium protein, unknown function	PBANKA_0103300.1-p1	0	24	S4(Phospho): 100
NSEISSPQNSASNLNTSTNIEKR	1xTMT6plex [K22]; 1xTMT6plex [N-Term]; 1xPhospho [S/T]	2	PBANKA_0103300		conserved Plasmodium protein, unknown function	1	-0.3	-0.4	-0.31	-0.25	-0.22	1	1	1	1	1		58
	Annotated Sequence	# Proteins	Master Protein Accessions			Protein Accessions	# Missed Cleavages	Ions Score	ptmRS: Best Site Probabilities
	nSEISsPQNSASNLNTSTNIEkR	1	PBANKA_0103300		conserved Plasmodium protein, unknown function	PBANKA_0103300.1-p1	1	58	S5(Phospho): 50; S6(Phospho): 50
	nSEISsPQNSASNLNTSTNIEkR	1	PBANKA_0103300		conserved Plasmodium protein, unknown function	PBANKA_0103300.1-p1	1	24	S5(Phospho): 50; S6(Phospho): 50
SYSHMENDEGVDPNNNSEGEVSFKR	1xOxidation [M5]; 1xTMT6plex [K24]; 1xTMT6plex [N-Term]; 1xPhospho [S3(99.3)]	1	PBANKA_0103900		RNA-binding protein, putative	1	0	0.09	-0.26	-0.28	0.05							22
	Annotated Sequence	# Proteins	Master Protein Accessions			Protein Accessions	# Missed Cleavages	Ions Score	ptmRS: Best Site Probabilities
	sYsHmENDEGVDPNNNSEGEVSFkR	1	PBANKA_0103900		RNA-binding protein, putative	PBANKA_0103900.1-p1	1	22	S3(Phospho): 99.3
NKENNYYDNYSNNNMDDYDNFSVPR	1xTMT6plex [K2]; 1xTMT6plex [N-Term]; 1xPhospho [S11(99.2)]	3	PBANKA_0103900		RNA-binding protein, putative	1	-0.18	-0.32	-0.14	-0.3	-0.42	1	1	1	1	1		46
	Annotated Sequence	# Proteins	Master Protein Accessions			Protein Accessions	# Missed Cleavages	Ions Score	ptmRS: Best Site Probabilities
	nkENNYYDNYsNNNMDDYDNFSVPR	1	PBANKA_0103900		RNA-binding protein, putative	PBANKA_0103900.1-p1	1	46	S11(Phospho): 99.17
	nkENNYYDNYsNNNMDDYDNFSVPR	1	PBANKA_0103900		RNA-binding protein, putative	PBANKA_0103900.1-p1	1	26	Y10(Phospho): 49.85; S11(Phospho): 49.85
	nkENNYYDNYsNNNMDDYDNFSVPR	1	PBANKA_0103900		RNA-binding protein, putative	PBANKA_0103900.1-p1	1	22	S11(Phospho): 99.33
SYSHMENDEGVDPNNNSEGEVSFK	1xTMT6plex [K24]; 1xTMT6plex [N-Term]; 1xPhospho [S/Y]	2	PBANKA_0103900		RNA-binding protein, putative	0	-0.06	0.02	-0.04	0.09	-0.08							33
	Annotated Sequence	# Proteins	Master Protein Accessions			Protein Accessions	# Missed Cleavages	Ions Score	ptmRS: Best Site Probabilities
	sYSHMENDEGVDPNNNSEGEVSFk	1	PBANKA_0103900		RNA-binding protein, putative	PBANKA_0103900.1-p1	0	33	S1(Phospho): 99.99
	sYsHMENDEGVDPNNNSEGEVSFk	1	PBANKA_0103900		RNA-binding protein, putative	PBANKA_0103900.1-p1	0	19	S1(Phospho): 50; S3(Phospho): 50
SYSHMENDEGVDPNNNSEGEVSFKR	1xTMT6plex [K24]; 1xTMT6plex [N-Term]; 1xPhospho [S1(100)]	2	PBANKA_0103900		RNA-binding protein, putative	1	-0.15	0.12	0.2	0.1	0.02							24
	Annotated Sequence	# Proteins	Master Protein Accessions			Protein Accessions	# Missed Cleavages	Ions Score	ptmRS: Best Site Probabilities
	sYSHMENDEGVDPNNNSEGEVSFkR	1	PBANKA_0103900		RNA-binding protein, putative	PBANKA_0103900.1-p1	1	24	S1(Phospho): 100
	sYSHMENDEGVDPNNNSEGEVSFkR	1	PBANKA_0103900		RNA-binding protein, putative	PBANKA_0103900.1-p1	1	24	S1(Phospho): 100
SYSHMENDEGVDPNNNSEGEVSFK	1xTMT6plex [K24]; 1xTMT6plex [N-Term]; 2xPhospho [S1(99.5); S17(100)]	2	PBANKA_0103900		RNA-binding protein, putative	0	-0.08	0.29	-0.24	-0.19	-0.24							39
	Annotated Sequence	# Proteins	Master Protein Accessions			Protein Accessions	# Missed Cleavages	Ions Score	ptmRS: Best Site Probabilities
	sYSHMENDEGVDPNNNsEGEVSFk	1	PBANKA_0103900		RNA-binding protein, putative	PBANKA_0103900.1-p1	0	39	S1(Phospho): 99.48; S17(Phospho): 100
	sYsHMENDEGVDPNNNsEGEVSFk	1	PBANKA_0103900		RNA-binding protein, putative	PBANKA_0103900.1-p1	0	13	S1(Phospho): 50; S3(Phospho): 50; S17(Phospho): 100
SYSHMENDEGVDPNNNSEGEVSFK	1xOxidation [M5]; 1xTMT6plex [K24]; 1xTMT6plex [N-Term]; 1xPhospho [S3(99.4)]	1	PBANKA_0103900		RNA-binding protein, putative	0	-0.05	-0.14	-0.63	-0.18	0.17							15
	Annotated Sequence	# Proteins	Master Protein Accessions			Protein Accessions	# Missed Cleavages	Ions Score	ptmRS: Best Site Probabilities
	sYsHmENDEGVDPNNNSEGEVSFk	1	PBANKA_0103900		RNA-binding protein, putative	PBANKA_0103900.1-p1	0	15	S3(Phospho): 99.38
SYSHMENDEGVDPNNNSEGEVSFKR	1xTMT6plex [K24]; 1xTMT6plex [N-Term]; 2xPhospho [S1(100); S17(100)]	2	PBANKA_0103900		RNA-binding protein, putative	1	0.04	0.08	0.15	-0.03	-0.15	1	1	1	1	1		35
	Annotated Sequence	# Proteins	Master Protein Accessions			Protein Accessions	# Missed Cleavages	Ions Score	ptmRS: Best Site Probabilities
	sYSHMENDEGVDPNNNsEGEVSFkR	1	PBANKA_0103900		RNA-binding protein, putative	PBANKA_0103900.1-p1	1	35	S1(Phospho): 100; S17(Phospho): 100
	sYSHMENDEGVDPNNNsEGEVSFkR	1	PBANKA_0103900		RNA-binding protein, putative	PBANKA_0103900.1-p1	1	33	S1(Phospho): 99.99; S17(Phospho): 100
NKENNYYDNYSNNNMDDYDNFSVPR	1xOxidation [M15]; 1xTMT6plex [K2]; 1xTMT6plex [N-Term]; 1xPhospho [S11(99.4)]	1	PBANKA_0103900		RNA-binding protein, putative	1	-0.31	0.08	-0.53	-0.27	-0.45							35
	Annotated Sequence	# Proteins	Master Protein Accessions			Protein Accessions	# Missed Cleavages	Ions Score	ptmRS: Best Site Probabilities
	nkENNYYDNYsNNNmDDYDNFSVPR	1	PBANKA_0103900		RNA-binding protein, putative	PBANKA_0103900.1-p1	1	35	S11(Phospho): 99.35
CNPVGSFSDANFINIENETEINDNVK	1xCarbamidomethyl [C1]; 1xTMT6plex [K26]; 1xTMT6plex [N-Term]; 1xPhospho [S6(100)]	4	PBANKA_0104400		nucleoside diphosphate kinase, putative	0	-0.11	-0.07	0.17	-0.09	-0.32	1	1	1	1	1		118
	Annotated Sequence	# Proteins	Master Protein Accessions			Protein Accessions	# Missed Cleavages	Ions Score	ptmRS: Best Site Probabilities
	cNPVGsFSDANFINIENETEINDNVk	1	PBANKA_0104400		nucleoside diphosphate kinase, putative	PBANKA_0104400.1-p1	0	118	S6(Phospho): 100
	cNPVGsFSDANFINIENETEINDNVk	1	PBANKA_0104400		nucleoside diphosphate kinase, putative	PBANKA_0104400.1-p1	0	75	S6(Phospho): 100
	cNPVGsFSDANFINIENETEINDNVk	1	PBANKA_0104400		nucleoside diphosphate kinase, putative	PBANKA_0104400.1-p1	0	57	S6(Phospho): 100
	cNPVGsFSDANFINIENETEINDNVk	1	PBANKA_0104400		nucleoside diphosphate kinase, putative	PBANKA_0104400.1-p1	0	38	S6(Phospho): 100
GINIEQFEEIISGKPSFSNNYK	2xTMT6plex [K14; K22]; 1xTMT6plex [N-Term]; 1xPhospho [S16(100)]	7	PBANKA_0104400		nucleoside diphosphate kinase, putative	0	0.42	0.61	0.64	0.43	0.56	1	1	1	1	1		44
	Annotated Sequence	# Proteins	Master Protein Accessions			Protein Accessions	# Missed Cleavages	Ions Score	ptmRS: Best Site Probabilities
	gINIEQFEEIISGkPsFSNNYk	1	PBANKA_0104400		nucleoside diphosphate kinase, putative	PBANKA_0104400.1-p1	0	44	S16(Phospho): 100
	gINIEQFEEIISGkPSFsNNYk	1	PBANKA_0104400		nucleoside diphosphate kinase, putative	PBANKA_0104400.1-p1	0	41	S18(Phospho): 99.99
	gINIEQFEEIISGkPSFsNNYk	1	PBANKA_0104400		nucleoside diphosphate kinase, putative	PBANKA_0104400.1-p1	0	37	S16(Phospho): 100
	gINIEQFEEIIsGkPSFSNNYk	1	PBANKA_0104400		nucleoside diphosphate kinase, putative	PBANKA_0104400.1-p1	0	33	S12(Phospho): 100
	gINIEQFEEIISGkPSFsNNYk	1	PBANKA_0104400		nucleoside diphosphate kinase, putative	PBANKA_0104400.1-p1	0	32	S16(Phospho): 100
	gINIEQFEEIIsGkPSFSNNYk	1	PBANKA_0104400		nucleoside diphosphate kinase, putative	PBANKA_0104400.1-p1	0	24	S12(Phospho): 100
	gINIEQFEEIISGkPsFSNNYk	1	PBANKA_0104400		nucleoside diphosphate kinase, putative	PBANKA_0104400.1-p1	0	16	S16(Phospho): 99.4
HIESDYVNIEEIKSDSCLTEK	1xCarbamidomethyl [C17]; 2xTMT6plex [K13; K21]; 1xTMT6plex [N-Term]; 1xPhospho [S4(100)]	5	PBANKA_0104400		nucleoside diphosphate kinase, putative	1	0.01	0.13	0.15	0.1	0.17	1	1	1	1	1		38
	Annotated Sequence	# Proteins	Master Protein Accessions			Protein Accessions	# Missed Cleavages	Ions Score	ptmRS: Best Site Probabilities
	hIEsDYVNIEEIkSDScLTEk	1	PBANKA_0104400		nucleoside diphosphate kinase, putative	PBANKA_0104400.1-p1	1	38	S4(Phospho): 100
	hIEsDYVNIEEIkSDScLTEk	1	PBANKA_0104400		nucleoside diphosphate kinase, putative	PBANKA_0104400.1-p1	1	34	S4(Phospho): 100
	hIESDYVNIEEIksDScLTEk	1	PBANKA_0104400		nucleoside diphosphate kinase, putative	PBANKA_0104400.1-p1	1	30	S14(Phospho): 99.58
	hIEsDYVNIEEIkSDScLTEk	1	PBANKA_0104400		nucleoside diphosphate kinase, putative	PBANKA_0104400.1-p1	1	21	S4(Phospho): 100
	hIESDYVNIEEIksDScLTEk	1	PBANKA_0104400		nucleoside diphosphate kinase, putative	PBANKA_0104400.1-p1	1	21	S14(Phospho): 99.48
SDSCLTEKASK	1xCarbamidomethyl [C4]; 2xTMT6plex [K8; K11]; 1xTMT6plex [N-Term]; 1xPhospho [S10(100)]	1	PBANKA_0104400		nucleoside diphosphate kinase, putative	1	0.73	0.17	0.12	0.45	-0.18							18
	Annotated Sequence	# Proteins	Master Protein Accessions			Protein Accessions	# Missed Cleavages	Ions Score	ptmRS: Best Site Probabilities
	sDScLTEkAsk	1	PBANKA_0104400		nucleoside diphosphate kinase, putative	PBANKA_0104400.1-p1	1	18	S10(Phospho): 100
HIESDYVNIEEIK	1xTMT6plex [K13]; 1xTMT6plex [N-Term]; 1xPhospho [S4(100)]	2	PBANKA_0104400		nucleoside diphosphate kinase, putative	0	0.14	0.09	0.14	0.17	-0.05	1	1	1	1	1		43
	Annotated Sequence	# Proteins	Master Protein Accessions			Protein Accessions	# Missed Cleavages	Ions Score	ptmRS: Best Site Probabilities
	hIEsDYVNIEEIk	1	PBANKA_0104400		nucleoside diphosphate kinase, putative	PBANKA_0104400.1-p1	0	43	S4(Phospho): 100
	hIEsDYVNIEEIk	1	PBANKA_0104400		nucleoside diphosphate kinase, putative	PBANKA_0104400.1-p1	0	41	S4(Phospho): 100
HNNDICYSNKYEGYTYGDIESK	1xCarbamidomethyl [C6]; 2xTMT6plex [K10; K22]; 1xTMT6plex [N-Term]; 1xPhospho [S8(100)]	1	PBANKA_0104400		nucleoside diphosphate kinase, putative	1	0.3	0.19	0.29	0.24	0.14							47
	Annotated Sequence	# Proteins	Master Protein Accessions			Protein Accessions	# Missed Cleavages	Ions Score	ptmRS: Best Site Probabilities
	hNNDIcYsNkYEGYTYGDIESk	1	PBANKA_0104400		nucleoside diphosphate kinase, putative	PBANKA_0104400.1-p1	1	47	S8(Phospho): 100
SLITLENITNCVNKNEDILGDYLIK	1xCarbamidomethyl [C11]; 2xTMT6plex [K14; K25]; 1xTMT6plex [N-Term]; 1xPhospho [T4(100)]	1	PBANKA_0104600	RAD5	DNA repair protein RAD5, putative	1											No Quan Values	23
	Annotated Sequence	# Proteins	Master Protein Accessions			Protein Accessions	# Missed Cleavages	Ions Score	ptmRS: Best Site Probabilities
	sLItLENITNcVNkNEDILGDYLIk	1	PBANKA_0104600	RAD5	DNA repair protein RAD5, putative	PBANKA_0104600.1-p1	1	23	T4(Phospho): 100
SLITLENITNCVNK	1xCarbamidomethyl [C11]; 1xTMT6plex [K14]; 1xTMT6plex [N-Term]; 1xPhospho [T4(99.4)]	1	PBANKA_0104600	RAD5	DNA repair protein RAD5, putative	0	-0.07	-0.19	-0.31	0.12	-0.47							19
	Annotated Sequence	# Proteins	Master Protein Accessions			Protein Accessions	# Missed Cleavages	Ions Score	ptmRS: Best Site Probabilities
	sLItLENITNcVNk	1	PBANKA_0104600	RAD5	DNA repair protein RAD5, putative	PBANKA_0104600.1-p1	0	19	T4(Phospho): 99.41
KALSQCANNDYK	1xCarbamidomethyl [C6]; 2xTMT6plex [K1; K12]; 1xTMT6plex [N-Term]; 1xPhospho [S4(100)]	2	PBANKA_0104800		conserved Plasmodium protein, unknown function	1	-0.35	-0.32	-0.3	-0.04	-0.45							22
	Annotated Sequence	# Proteins	Master Protein Accessions			Protein Accessions	# Missed Cleavages	Ions Score	ptmRS: Best Site Probabilities
	kALsQcANNDYk	1	PBANKA_0104800		conserved Plasmodium protein, unknown function	PBANKA_0104800.1-p1	1	22	S4(Phospho): 100
	kALsQcANNDYk	1	PBANKA_0104800		conserved Plasmodium protein, unknown function	PBANKA_0104800.1-p1	1	17	S4(Phospho): 100
QGSIHGGK	1xTMT6plex [K8]; 1xTMT6plex [N-Term]; 1xPhospho [S3(100)]	2	PBANKA_0104800		conserved Plasmodium protein, unknown function	0	0.06	-0.51	-0.59	0.39	0.56	1	1	1	1	1		30
	Annotated Sequence	# Proteins	Master Protein Accessions			Protein Accessions	# Missed Cleavages	Ions Score	ptmRS: Best Site Probabilities
	qGsIHGGk	1	PBANKA_0104800		conserved Plasmodium protein, unknown function	PBANKA_0104800.1-p1	0	30	S3(Phospho): 100
	qGsIHGGk	1	PBANKA_0104800		conserved Plasmodium protein, unknown function	PBANKA_0104800.1-p1	0	22	S3(Phospho): 100
IGINDDNNSISSKK	2xTMT6plex [K13; K14]; 1xTMT6plex [N-Term]; 1xPhospho [S9(100)]	3	PBANKA_0104800		conserved Plasmodium protein, unknown function	1	-0.09	-0.29	-0.22	-0.22	-0.08	1	1	1	1	1		38
	Annotated Sequence	# Proteins	Master Protein Accessions			Protein Accessions	# Missed Cleavages	Ions Score	ptmRS: Best Site Probabilities
	iGINDDNNsISSkk	1	PBANKA_0104800		conserved Plasmodium protein, unknown function	PBANKA_0104800.1-p1	1	38	S9(Phospho): 100
	iGINDDNNsISSkk	1	PBANKA_0104800		conserved Plasmodium protein, unknown function	PBANKA_0104800.1-p1	1	36	S9(Phospho): 100
	iGINDDNNsISSkk	1	PBANKA_0104800		conserved Plasmodium protein, unknown function	PBANKA_0104800.1-p1	1	26	S9(Phospho): 99.31
NMNINITNLNSLER	1xTMT6plex [N-Term]; 1xPhospho [S11(100)]	4	PBANKA_0104800		conserved Plasmodium protein, unknown function	0	-0.18	-0.16	-0.23	-0.28	-0.27	1	1	1	1	1		62
	Annotated Sequence	# Proteins	Master Protein Accessions			Protein Accessions	# Missed Cleavages	Ions Score	ptmRS: Best Site Probabilities
	nMNINITNLNsLER	1	PBANKA_0104800		conserved Plasmodium protein, unknown function	PBANKA_0104800.1-p1	0	62	S11(Phospho): 100
	nMNINITNLNsLER	1	PBANKA_0104800		conserved Plasmodium protein, unknown function	PBANKA_0104800.1-p1	0	53	S11(Phospho): 100
	nMNINITNLNsLER	1	PBANKA_0104800		conserved Plasmodium protein, unknown function	PBANKA_0104800.1-p1	0	45	S11(Phospho): 100
	nMNINITNLNsLER	1	PBANKA_0104800		conserved Plasmodium protein, unknown function	PBANKA_0104800.1-p1	0	21	S11(Phospho): 100
GNSSIMDADSYNLNK	1xOxidation [M6]; 1xTMT6plex [K15]; 1xTMT6plex [N-Term]; 1xPhospho [S3(99.5)]	2	PBANKA_0104800		conserved Plasmodium protein, unknown function	0	-0.13	-0.06	-0.4	-0.23	-0.25							16
	Annotated Sequence	# Proteins	Master Protein Accessions			Protein Accessions	# Missed Cleavages	Ions Score	ptmRS: Best Site Probabilities
	gNsSImDADSYNLNk	1	PBANKA_0104800		conserved Plasmodium protein, unknown function	PBANKA_0104800.1-p1	0	16	S3(Phospho): 99.5
	gNsSImDADSYNLNk	1	PBANKA_0104800		conserved Plasmodium protein, unknown function	PBANKA_0104800.1-p1	0	14	S3(Phospho): 99.5
GNSSIMDADSYNLNK	1xTMT6plex [K15]; 1xTMT6plex [N-Term]; 1xPhospho [S3(99.7)]	2	PBANKA_0104800		conserved Plasmodium protein, unknown function	0	-0.38	-0.48	-0.46	-0.54	-0.42	1	0.45862	0.399975	0.343017	1		37
	Annotated Sequence	# Proteins	Master Protein Accessions			Protein Accessions	# Missed Cleavages	Ions Score	ptmRS: Best Site Probabilities
	gNsSIMDADSYNLNk	1	PBANKA_0104800		conserved Plasmodium protein, unknown function	PBANKA_0104800.1-p1	0	37	S3(Phospho): 99.72
	gNsSIMDADSYNLNk	1	PBANKA_0104800		conserved Plasmodium protein, unknown function	PBANKA_0104800.1-p1	0	30	S3(Phospho): 99.72
TNVGISNNASDFENFDDKK	2xTMT6plex [K18; K19]; 1xTMT6plex [N-Term]; 1xPhospho [S10(100)]	2	PBANKA_0104800		conserved Plasmodium protein, unknown function	1	-0.23	-0.5	-0.49	-0.39	-0.58	1	1	1	1	1		49
	Annotated Sequence	# Proteins	Master Protein Accessions			Protein Accessions	# Missed Cleavages	Ions Score	ptmRS: Best Site Probabilities
	tNVGISNNAsDFENFDDkk	1	PBANKA_0104800		conserved Plasmodium protein, unknown function	PBANKA_0104800.1-p1	1	49	S10(Phospho): 100
	tNVGISNNAsDFENFDDkk	1	PBANKA_0104800		conserved Plasmodium protein, unknown function	PBANKA_0104800.1-p1	1	48	S10(Phospho): 100
TQLSICNNLNKK	1xCarbamidomethyl [C6]; 2xTMT6plex [K11; K12]; 1xTMT6plex [N-Term]; 1xPhospho [S4(100)]	2	PBANKA_0104900		RNA-binding protein, putative	1	-0.11	-0.27	0.02	-0.28	-0.02							19
	Annotated Sequence	# Proteins	Master Protein Accessions			Protein Accessions	# Missed Cleavages	Ions Score	ptmRS: Best Site Probabilities
	tQLsIcNNLNkk	1	PBANKA_0104900		RNA-binding protein, putative	PBANKA_0104900.1-p1	1	19	S4(Phospho): 100
	tQLsIcNNLNkk	1	PBANKA_0104900		RNA-binding protein, putative	PBANKA_0104900.1-p1	1	14	S4(Phospho): 100
TQLSICNNLNK	1xCarbamidomethyl [C6]; 1xTMT6plex [K11]; 1xTMT6plex [N-Term]; 1xPhospho [S4(100)]	3	PBANKA_0104900		RNA-binding protein, putative	0	-0.26	-0.17	-0.15	-0.26	-0.17	1	1	1	1	1		45
	Annotated Sequence	# Proteins	Master Protein Accessions			Protein Accessions	# Missed Cleavages	Ions Score	ptmRS: Best Site Probabilities
	tQLsIcNNLNk	1	PBANKA_0104900		RNA-binding protein, putative	PBANKA_0104900.1-p1	0	45	S4(Phospho): 100
	tQLsIcNNLNk	1	PBANKA_0104900		RNA-binding protein, putative	PBANKA_0104900.1-p1	0	29	S4(Phospho): 100
	tQLsIcNNLNk	1	PBANKA_0104900		RNA-binding protein, putative	PBANKA_0104900.1-p1	0	25	S4(Phospho): 100
CSISGDIDSFIGK	1xCarbamidomethyl [C1]; 1xTMT6plex [K13]; 1xTMT6plex [N-Term]; 1xPhospho [S4(100)]	3	PBANKA_0105200	PTB	polypyrimidine tract-binding protein, putative	0	-0.14	-0.28	-0.19	-0.23	-0.11	1	1	1	1	1		54
	Annotated Sequence	# Proteins	Master Protein Accessions			Protein Accessions	# Missed Cleavages	Ions Score	ptmRS: Best Site Probabilities
	cSIsGDIDSFIGk	1	PBANKA_0105200	PTB	polypyrimidine tract-binding protein, putative	PBANKA_0105200.1-p1	0	54	S4(Phospho): 100
	cSIsGDIDSFIGk	1	PBANKA_0105200	PTB	polypyrimidine tract-binding protein, putative	PBANKA_0105200.1-p1	0	33	S4(Phospho): 100
	cSIsGDIDSFIGk	1	PBANKA_0105200	PTB	polypyrimidine tract-binding protein, putative	PBANKA_0105200.1-p1	0	22	S4(Phospho): 100
NNFSFQTSHGVLPTPTR	1xTMT6plex [N-Term]; 1xPhospho [T/S]	1	PBANKA_0105200	PTB	polypyrimidine tract-binding protein, putative	0	-0.08	-0.2	-0.12	-0.02	-0.09							39
	Annotated Sequence	# Proteins	Master Protein Accessions			Protein Accessions	# Missed Cleavages	Ions Score	ptmRS: Best Site Probabilities
	nNFSFQTsHGVLPTPTR	1	PBANKA_0105200	PTB	polypyrimidine tract-binding protein, putative	PBANKA_0105200.1-p1	0	39	T7(Phospho): 50; S8(Phospho): 50
NESINLDSSFFDTK	1xTMT6plex [K14]; 1xTMT6plex [N-Term]; 1xPhospho [S3(100)]	2	PBANKA_0105300		conserved Plasmodium protein, unknown function	0	0.1	0.26	0.34	0.27	0.26	1	1	1	1	1		49
	Annotated Sequence	# Proteins	Master Protein Accessions			Protein Accessions	# Missed Cleavages	Ions Score	ptmRS: Best Site Probabilities
	nEsINLDSSFFDTk	1	PBANKA_0105300		conserved Plasmodium protein, unknown function	PBANKA_0105300.1-p1	0	49	S3(Phospho): 100
	nEsINLDSSFFDTk	1	PBANKA_0105300		conserved Plasmodium protein, unknown function	PBANKA_0105300.1-p1	0	30	S3(Phospho): 100
KNESINLDSSFFDTK	2xTMT6plex [K1; K15]; 1xTMT6plex [N-Term]; 1xPhospho [S4(100)]	3	PBANKA_0105300		conserved Plasmodium protein, unknown function	1	0.23	0.16	0.35	0.05	0.3							83
	Annotated Sequence	# Proteins	Master Protein Accessions			Protein Accessions	# Missed Cleavages	Ions Score	ptmRS: Best Site Probabilities
	kNEsINLDSSFFDTk	1	PBANKA_0105300		conserved Plasmodium protein, unknown function	PBANKA_0105300.1-p1	1	83	S4(Phospho): 100
	kNEsINLDSSFFDTk	1	PBANKA_0105300		conserved Plasmodium protein, unknown function	PBANKA_0105300.1-p1	1	55	S4(Phospho): 100
	kNEsINLDSSFFDTk	1	PBANKA_0105300		conserved Plasmodium protein, unknown function	PBANKA_0105300.1-p1	1	29	S4(Phospho): 100
SGDTNTELSLVNK	1xTMT6plex [K13]; 1xTMT6plex [N-Term]; 1xPhospho [T4(99.7)]	2	PBANKA_0105300		conserved Plasmodium protein, unknown function	0	0.16	0.08	0.24	0.12	0.16	1	1	1	1	1		25
	Annotated Sequence	# Proteins	Master Protein Accessions			Protein Accessions	# Missed Cleavages	Ions Score	ptmRS: Best Site Probabilities
	sGDtNTELSLVNk	1	PBANKA_0105300		conserved Plasmodium protein, unknown function	PBANKA_0105300.1-p1	0	25	T4(Phospho): 99.72
	sGDtNTELSLVNk	1	PBANKA_0105300		conserved Plasmodium protein, unknown function	PBANKA_0105300.1-p1	0	24	T4(Phospho): 100
YDDNFIDNIISKISLTDNK	2xTMT6plex [K12; K19]; 1xTMT6plex [N-Term]; 1xPhospho [S14(98.6)]	3	PBANKA_0105300		conserved Plasmodium protein, unknown function	1	-0.01	0.26	0.2	0.25	0.28	1	1	1	1	1		30
	Annotated Sequence	# Proteins	Master Protein Accessions			Protein Accessions	# Missed Cleavages	Ions Score	ptmRS: Best Site Probabilities
	yDDNFIDNIISkISLtDNk	1	PBANKA_0105300		conserved Plasmodium protein, unknown function	PBANKA_0105300.1-p1	1	30	S14(Phospho): 100
	yDDNFIDNIISkIsLTDNk	1	PBANKA_0105300		conserved Plasmodium protein, unknown function	PBANKA_0105300.1-p1	1	18	S14(Phospho): 98.6
	yDDNFIDNIISkIsLTDNk	1	PBANKA_0105300		conserved Plasmodium protein, unknown function	PBANKA_0105300.1-p1	1	16	S14(Phospho): 99.21
MDTSDIIIK	1xTMT6plex [K9]; 1xTMT6plex [N-Term]; 1xPhospho [T3(100)]	1	PBANKA_0105300		conserved Plasmodium protein, unknown function	0	-0.04	-0.1	0.02	0.15	-0.1							15
	Annotated Sequence	# Proteins	Master Protein Accessions			Protein Accessions	# Missed Cleavages	Ions Score	ptmRS: Best Site Probabilities
	mDtSDIIIk	1	PBANKA_0105300		conserved Plasmodium protein, unknown function	PBANKA_0105300.1-p1	0	15	T3(Phospho): 100
RASIVELK	1xTMT6plex [K8]; 1xTMT6plex [N-Term]; 1xPhospho [S3(100)]	1	PBANKA_0105300		conserved Plasmodium protein, unknown function	1											No Quan Values	17
	Annotated Sequence	# Proteins	Master Protein Accessions			Protein Accessions	# Missed Cleavages	Ions Score	ptmRS: Best Site Probabilities
	rAsIVELk	1	PBANKA_0105300		conserved Plasmodium protein, unknown function	PBANKA_0105300.1-p1	1	17	S3(Phospho): 100
KMDTSDIIIK	2xTMT6plex [K1; K10]; 1xTMT6plex [N-Term]; 1xPhospho [T4(100)]	1	PBANKA_0105300		conserved Plasmodium protein, unknown function	1	0.21	-0.02	0.05	-0.06	0							30
	Annotated Sequence	# Proteins	Master Protein Accessions			Protein Accessions	# Missed Cleavages	Ions Score	ptmRS: Best Site Probabilities
	kMDtSDIIIk	1	PBANKA_0105300		conserved Plasmodium protein, unknown function	PBANKA_0105300.1-p1	1	30	T4(Phospho): 100
NINSFFHK	1xTMT6plex [K8]; 1xTMT6plex [N-Term]; 1xPhospho [S4(100)]	3	PBANKA_0105300		conserved Plasmodium protein, unknown function	0	-0.16	0.13	0.53	0.33	0.27	1	1	1	1	1		30
	Annotated Sequence	# Proteins	Master Protein Accessions			Protein Accessions	# Missed Cleavages	Ions Score	ptmRS: Best Site Probabilities
	nINsFFHk	1	PBANKA_0105300		conserved Plasmodium protein, unknown function	PBANKA_0105300.1-p1	0	30	S4(Phospho): 100
	nINsFFHk	1	PBANKA_0105300		conserved Plasmodium protein, unknown function	PBANKA_0105300.1-p1	0	26	S4(Phospho): 100
	nINsFFHk	1	PBANKA_0105300		conserved Plasmodium protein, unknown function	PBANKA_0105300.1-p1	0	22	S4(Phospho): 100
SGDTNTELSLVNKK	2xTMT6plex [K13; K14]; 1xTMT6plex [N-Term]; 1xPhospho [T4(100)]	2	PBANKA_0105300		conserved Plasmodium protein, unknown function	1	0.33	0.35	0.2	0.12	0.33							21
	Annotated Sequence	# Proteins	Master Protein Accessions			Protein Accessions	# Missed Cleavages	Ions Score	ptmRS: Best Site Probabilities
	sGDtNTELSLVNkk	1	PBANKA_0105300		conserved Plasmodium protein, unknown function	PBANKA_0105300.1-p1	1	21	T4(Phospho): 100
	sGDtNTELSLVNkk	1	PBANKA_0105300		conserved Plasmodium protein, unknown function	PBANKA_0105300.1-p1	1	18	T4(Phospho): 100
TNTPFDKIDSFHVK	2xTMT6plex [K7; K14]; 1xTMT6plex [N-Term]; 1xPhospho [S10(100)]	2	PBANKA_0105300		conserved Plasmodium protein, unknown function	1	0.06	-0.05	0	0.1	0.06	1	1	1	1	1		25
	Annotated Sequence	# Proteins	Master Protein Accessions			Protein Accessions	# Missed Cleavages	Ions Score	ptmRS: Best Site Probabilities
	tNTPFDkIDsFHVk	1	PBANKA_0105300		conserved Plasmodium protein, unknown function	PBANKA_0105300.1-p1	1	25	S10(Phospho): 100
	tNTPFDkIDsFHVk	1	PBANKA_0105300		conserved Plasmodium protein, unknown function	PBANKA_0105300.1-p1	1	18	S10(Phospho): 100
IDSFHVK	1xTMT6plex [K7]; 1xTMT6plex [N-Term]; 1xPhospho [S3(100)]	1	PBANKA_0105300		conserved Plasmodium protein, unknown function	0	0.21	-0.06	-0.1	0	-0.85							22
	Annotated Sequence	# Proteins	Master Protein Accessions			Protein Accessions	# Missed Cleavages	Ions Score	ptmRS: Best Site Probabilities
	iDsFHVk	1	PBANKA_0105300		conserved Plasmodium protein, unknown function	PBANKA_0105300.1-p1	0	22	S3(Phospho): 100
YKEQIGNINSNNNDLLINNQTHINSR	1xTMT6plex [K2]; 1xTMT6plex [N-Term]; 1xPhospho [S25(100)]	1	PBANKA_0105400		coatomer alpha subunit, putative	1	-0.02	-0.08	0.1	-0.07	0.28							33
	Annotated Sequence	# Proteins	Master Protein Accessions			Protein Accessions	# Missed Cleavages	Ions Score	ptmRS: Best Site Probabilities
	ykEQIGNINSNNNDLLINNQTHINsR	1	PBANKA_0105400		coatomer alpha subunit, putative	PBANKA_0105400.1-p1	1	33	S25(Phospho): 100
NLSQPFSNSPFGVLK	1xTMT6plex [K15]; 1xTMT6plex [N-Term]; 1xPhospho [S3(100)]	3	PBANKA_0105400		coatomer alpha subunit, putative	0	-0.16	-0.05	-0.16	-0.1	-0.2	1	1	1	1	1		61
	Annotated Sequence	# Proteins	Master Protein Accessions			Protein Accessions	# Missed Cleavages	Ions Score	ptmRS: Best Site Probabilities
	nLSQPFSNsPFGVLk	1	PBANKA_0105400		coatomer alpha subunit, putative	PBANKA_0105400.1-p1	0	61	S9(Phospho): 100
	nLSQPFsNSPFGVLk	1	PBANKA_0105400		coatomer alpha subunit, putative	PBANKA_0105400.1-p1	0	47	S7(Phospho): 100
	nLsQPFSNSPFGVLk	1	PBANKA_0105400		coatomer alpha subunit, putative	PBANKA_0105400.1-p1	0	39	S3(Phospho): 100
RGNISTIKPASENDTPFNTESVNYIIK	2xTMT6plex [K8; K27]; 1xTMT6plex [N-Term]; 1xPhospho [S11(100)]	2	PBANKA_0105400		coatomer alpha subunit, putative	1	-0.29	-0.09	-0.23	-0.48	-0.46							22
	Annotated Sequence	# Proteins	Master Protein Accessions			Protein Accessions	# Missed Cleavages	Ions Score	ptmRS: Best Site Probabilities
	rGNISTIkPAsENDTPFNTESVNYIIk	1	PBANKA_0105400		coatomer alpha subunit, putative	PBANKA_0105400.1-p1	1	22	S11(Phospho): 99.99
	rGNISTIkPAsENDTPFNTESVNYIIk	1	PBANKA_0105400		coatomer alpha subunit, putative	PBANKA_0105400.1-p1	1	22	S11(Phospho): 98.92
FIKNPSFELIFDK	2xTMT6plex [K3; K13]; 1xTMT6plex [N-Term]; 1xPhospho [S6(100)]	1	PBANKA_0105800		RING zinc finger protein, putative	1	0.07	0.07	0.16	0.04	0.2							40
	Annotated Sequence	# Proteins	Master Protein Accessions			Protein Accessions	# Missed Cleavages	Ions Score	ptmRS: Best Site Probabilities
	fIkNPsFELIFDk	1	PBANKA_0105800		RING zinc finger protein, putative	PBANKA_0105800.1-p1	1	40	S6(Phospho): 100
NPSFELIFDK	1xTMT6plex [K10]; 1xTMT6plex [N-Term]; 1xPhospho [S3(100)]	3	PBANKA_0105800		RING zinc finger protein, putative	0	0.15	0.11	-0.1	0.01	-0.07	1	1	1	1	1		33
	Annotated Sequence	# Proteins	Master Protein Accessions			Protein Accessions	# Missed Cleavages	Ions Score	ptmRS: Best Site Probabilities
	nPsFELIFDk	1	PBANKA_0105800		RING zinc finger protein, putative	PBANKA_0105800.1-p1	0	33	S3(Phospho): 100
	nPsFELIFDk	1	PBANKA_0105800		RING zinc finger protein, putative	PBANKA_0105800.1-p1	0	31	S3(Phospho): 100
	nPsFELIFDk	1	PBANKA_0105800		RING zinc finger protein, putative	PBANKA_0105800.1-p1	0	25	S3(Phospho): 100
LFDSESKDYIK	2xTMT6plex [K7; K11]; 1xTMT6plex [N-Term]; 1xPhospho [S6(100)]	4	PBANKA_0107200		conserved Plasmodium protein, unknown function	1	0.42	-0.01	0.07	0.22	0.1	1	1	1	1	1		29
	Annotated Sequence	# Proteins	Master Protein Accessions			Protein Accessions	# Missed Cleavages	Ions Score	ptmRS: Best Site Probabilities
	lFDSEskDYIk	1	PBANKA_0107200		conserved Plasmodium protein, unknown function	PBANKA_0107200.1-p1	1	29	S6(Phospho): 100
	lFDSEskDYIk	1	PBANKA_0107200		conserved Plasmodium protein, unknown function	PBANKA_0107200.1-p1	1	18	S6(Phospho): 100
	lFDSEskDYIk	1	PBANKA_0107200		conserved Plasmodium protein, unknown function	PBANKA_0107200.1-p1	1	15	S6(Phospho): 100
	lFDSEskDYIk	1	PBANKA_0107200		conserved Plasmodium protein, unknown function	PBANKA_0107200.1-p1	1	13	S6(Phospho): 100
YNTSPGLLER	1xTMT6plex [N-Term]; 1xPhospho [T3(99.7)]	4	PBANKA_0107200		conserved Plasmodium protein, unknown function	0	-0.09	-0.1	-0.11	-0.07	-0.12	1	1	1	1	1		38
	Annotated Sequence	# Proteins	Master Protein Accessions			Protein Accessions	# Missed Cleavages	Ions Score	ptmRS: Best Site Probabilities
	yNtSPGLLER	1	PBANKA_0107200		conserved Plasmodium protein, unknown function	PBANKA_0107200.1-p1	0	38	T3(Phospho): 99.69
	yNtSPGLLER	1	PBANKA_0107200		conserved Plasmodium protein, unknown function	PBANKA_0107200.1-p1	0	29	T3(Phospho): 100
	yNtSPGLLER	1	PBANKA_0107200		conserved Plasmodium protein, unknown function	PBANKA_0107200.1-p1	0	23	T3(Phospho): 100
	yNtSPGLLER	1	PBANKA_0107200		conserved Plasmodium protein, unknown function	PBANKA_0107200.1-p1	0	22	T3(Phospho): 100
GSSIFGK	1xTMT6plex [K7]; 1xTMT6plex [N-Term]; 1xPhospho [S2(100)]	3	PBANKA_0107200		conserved Plasmodium protein, unknown function	0	0.21	0.45	0.49	0.35	0.03	1	1	1	1	1		14
	Annotated Sequence	# Proteins	Master Protein Accessions			Protein Accessions	# Missed Cleavages	Ions Score	ptmRS: Best Site Probabilities
	gsSIFGk	1	PBANKA_0107200		conserved Plasmodium protein, unknown function	PBANKA_0107200.1-p1	0	14	S2(Phospho): 100
	gsSIFGk	1	PBANKA_0107200		conserved Plasmodium protein, unknown function	PBANKA_0107200.1-p1	0	14	S2(Phospho): 100
	gSsIFGk	1	PBANKA_0107200		conserved Plasmodium protein, unknown function	PBANKA_0107200.1-p1	0	14	S3(Phospho): 100
NIGNSKANIYYQSNR	1xTMT6plex [K6]; 1xTMT6plex [N-Term]; 1xPhospho [S5(100)]	2	PBANKA_0107200		conserved Plasmodium protein, unknown function	1	0.28	0.54	0.61	0.17	-0.04	1	1	1	1	1		41
	Annotated Sequence	# Proteins	Master Protein Accessions			Protein Accessions	# Missed Cleavages	Ions Score	ptmRS: Best Site Probabilities
	nIGNskANIYYQSNR	1	PBANKA_0107200		conserved Plasmodium protein, unknown function	PBANKA_0107200.1-p1	1	41	S5(Phospho): 100
	nIGNskANIYYQSNR	1	PBANKA_0107200		conserved Plasmodium protein, unknown function	PBANKA_0107200.1-p1	1	34	S5(Phospho): 100
HQWKGSSIFGK	2xTMT6plex [K4; K11]; 1xTMT6plex [N-Term]; 1xPhospho [S6(99.8)]	1	PBANKA_0107200		conserved Plasmodium protein, unknown function	1	0	0.45	0.45	-0.01	0.32							14
	Annotated Sequence	# Proteins	Master Protein Accessions			Protein Accessions	# Missed Cleavages	Ions Score	ptmRS: Best Site Probabilities
	hQWkGSsIFGk	1	PBANKA_0107200		conserved Plasmodium protein, unknown function	PBANKA_0107200.1-p1	1	14	S6(Phospho): 99.75
DYIKYNTSPGLLER	1xTMT6plex [K4]; 1xTMT6plex [N-Term]; 1xPhospho [T7(100)]	1	PBANKA_0107200		conserved Plasmodium protein, unknown function	1	-0.41	-0.34	-0.24	-0.59	0.28							23
	Annotated Sequence	# Proteins	Master Protein Accessions			Protein Accessions	# Missed Cleavages	Ions Score	ptmRS: Best Site Probabilities
	dYIkYNtSPGLLER	1	PBANKA_0107200		conserved Plasmodium protein, unknown function	PBANKA_0107200.1-p1	1	23	T7(Phospho): 100
SEVFSSFVYSNAEDRDK	1xTMT6plex [K17]; 1xTMT6plex [N-Term]; 1xPhospho [S6(99.6)]	1	PBANKA_0107300	CCT6	T-complex protein 1 subunit zeta, putative	1	0.19	-0.22	0.17	-0.04	0.27							19
	Annotated Sequence	# Proteins	Master Protein Accessions			Protein Accessions	# Missed Cleavages	Ions Score	ptmRS: Best Site Probabilities
	sEVFSsFVYSNAEDRDk	1	PBANKA_0107300	CCT6	T-complex protein 1 subunit zeta, putative	PBANKA_0107300.1-p1	1	19	S6(Phospho): 99.57
ADSLRSTNVLLTNINASK	1xTMT6plex [K18]; 1xTMT6plex [N-Term]; 1xPhospho [S3(100)]	2	PBANKA_0107300	CCT6	T-complex protein 1 subunit zeta, putative	1	-0.12	0.36	0.16	0.18	0.46	1	1	1	1	1		34
	Annotated Sequence	# Proteins	Master Protein Accessions			Protein Accessions	# Missed Cleavages	Ions Score	ptmRS: Best Site Probabilities
	aDSLRStNVLLTNINASk	1	PBANKA_0107300	CCT6	T-complex protein 1 subunit zeta, putative	PBANKA_0107300.1-p1	1	34	S3(Phospho): 100
	aDsLRSTNVLLTNINASk	1	PBANKA_0107300	CCT6	T-complex protein 1 subunit zeta, putative	PBANKA_0107300.1-p1	1	14	S3(Phospho): 49.86; T7(Phospho): 49.86
NTENIDGEDDTNNDDDSGSEILK	1xTMT6plex [K23]; 1xTMT6plex [N-Term]; 1xPhospho [S17(100)]	1	PBANKA_0107600	NUP637	nucleoporin NUP637, putative	0	-0.15	-0.35	-0.56	-0.34	-0.6							90
	Annotated Sequence	# Proteins	Master Protein Accessions			Protein Accessions	# Missed Cleavages	Ions Score	ptmRS: Best Site Probabilities
	nTENIDGEDDTNNDDDsGSEILk	1	PBANKA_0107600	NUP637	nucleoporin NUP637, putative	PBANKA_0107600.1-p1	0	90	S17(Phospho): 100
YVYDYLSDIDLIDTIK	1xTMT6plex [K16]; 1xTMT6plex [N-Term]; 1xPhospho [S7(100)]	2	PBANKA_0107600	NUP637	nucleoporin NUP637, putative	0	-0.24	-0.43	-0.34	-0.37	-0.38	1	1	1	1	1		49
	Annotated Sequence	# Proteins	Master Protein Accessions			Protein Accessions	# Missed Cleavages	Ions Score	ptmRS: Best Site Probabilities
	yVYDYLsDIDLIDTIk	1	PBANKA_0107600	NUP637	nucleoporin NUP637, putative	PBANKA_0107600.1-p1	0	49	S7(Phospho): 100
	yVYDYLsDIDLIDTIk	1	PBANKA_0107600	NUP637	nucleoporin NUP637, putative	PBANKA_0107600.1-p1	0	48	S7(Phospho): 100
SKYVYDYLSDIDLIDTIK	2xTMT6plex [K2; K18]; 1xTMT6plex [N-Term]; 1xPhospho [S9(100)]	2	PBANKA_0107600	NUP637	nucleoporin NUP637, putative	1	-0.28	-0.35	-0.44	-0.36	-0.22	1	1	1	1	1		39
	Annotated Sequence	# Proteins	Master Protein Accessions			Protein Accessions	# Missed Cleavages	Ions Score	ptmRS: Best Site Probabilities
	skYVYDYLsDIDLIDTIk	1	PBANKA_0107600	NUP637	nucleoporin NUP637, putative	PBANKA_0107600.1-p1	1	39	S9(Phospho): 100
	skYVYDYLsDIDLIDTIk	1	PBANKA_0107600	NUP637	nucleoporin NUP637, putative	PBANKA_0107600.1-p1	1	26	S9(Phospho): 100
ENSIDEFFNFENIK	1xTMT6plex [K14]; 1xTMT6plex [N-Term]; 1xPhospho [S3(100)]	4	PBANKA_0108200		conserved Plasmodium protein, unknown function	0	-0.13	-0.31	-0.39	-0.26	-0.32	1	1	1	1	1		64
	Annotated Sequence	# Proteins	Master Protein Accessions			Protein Accessions	# Missed Cleavages	Ions Score	ptmRS: Best Site Probabilities
	eNsIDEFFNFENIk	1	PBANKA_0108200		conserved Plasmodium protein, unknown function	PBANKA_0108200.1-p1	0	64	S3(Phospho): 100
	eNsIDEFFNFENIk	1	PBANKA_0108200		conserved Plasmodium protein, unknown function	PBANKA_0108200.1-p1	0	47	S3(Phospho): 100
	eNsIDEFFNFENIk	1	PBANKA_0108200		conserved Plasmodium protein, unknown function	PBANKA_0108200.1-p1	0	34	S3(Phospho): 100
	eNsIDEFFNFENIk	1	PBANKA_0108200		conserved Plasmodium protein, unknown function	PBANKA_0108200.1-p1	0	34	S3(Phospho): 100
LTSFEENALEHK	1xTMT6plex [K12]; 1xTMT6plex [N-Term]; 1xPhospho [S3(99.8)]	2	PBANKA_0108200		conserved Plasmodium protein, unknown function	0	-0.04	0.05	0.17	-0.06	0.03	1	1	1	1	1		42
	Annotated Sequence	# Proteins	Master Protein Accessions			Protein Accessions	# Missed Cleavages	Ions Score	ptmRS: Best Site Probabilities
	lTsFEENALEHk	1	PBANKA_0108200		conserved Plasmodium protein, unknown function	PBANKA_0108200.1-p1	0	42	S3(Phospho): 99.83
	lTsFEENALEHk	1	PBANKA_0108200		conserved Plasmodium protein, unknown function	PBANKA_0108200.1-p1	0	41	S3(Phospho): 99.74
KFSQFNDEIK	2xTMT6plex [K1; K10]; 1xTMT6plex [N-Term]; 1xPhospho [S3(100)]	2	PBANKA_0108200		conserved Plasmodium protein, unknown function	1	0.24	0.48	0.67	0.43	0.32	1	1	1	1	1		30
	Annotated Sequence	# Proteins	Master Protein Accessions			Protein Accessions	# Missed Cleavages	Ions Score	ptmRS: Best Site Probabilities
	kFsQFNDEIk	1	PBANKA_0108200		conserved Plasmodium protein, unknown function	PBANKA_0108200.1-p1	1	30	S3(Phospho): 100
	kFsQFNDEIk	1	PBANKA_0108200		conserved Plasmodium protein, unknown function	PBANKA_0108200.1-p1	1	27	S3(Phospho): 100
SGNSFFENYNK	1xTMT6plex [K11]; 1xTMT6plex [N-Term]; 1xPhospho [S4(100)]	2	PBANKA_0108200		conserved Plasmodium protein, unknown function	0	-0.1	-0.05	-0.31	0.02	-0.32	1	1	1	1	1		18
	Annotated Sequence	# Proteins	Master Protein Accessions			Protein Accessions	# Missed Cleavages	Ions Score	ptmRS: Best Site Probabilities
	sGNsFFENYNk	1	PBANKA_0108200		conserved Plasmodium protein, unknown function	PBANKA_0108200.1-p1	0	18	S4(Phospho): 100
	sGNsFFENYNk	1	PBANKA_0108200		conserved Plasmodium protein, unknown function	PBANKA_0108200.1-p1	0	17	S4(Phospho): 100
RENSIDEFFNFENIK	1xTMT6plex [K15]; 1xTMT6plex [N-Term]; 1xPhospho [S4(100)]	1	PBANKA_0108200		conserved Plasmodium protein, unknown function	1	-0.25	0.02	-0.25	-0.22	-0.29							23
	Annotated Sequence	# Proteins	Master Protein Accessions			Protein Accessions	# Missed Cleavages	Ions Score	ptmRS: Best Site Probabilities
	rENsIDEFFNFENIk	1	PBANKA_0108200		conserved Plasmodium protein, unknown function	PBANKA_0108200.1-p1	1	23	S4(Phospho): 100
SAPISAGIK	1xTMT6plex [K9]; 1xTMT6plex [N-Term]; 1xPhospho [S1(100)]	7	PBANKA_0108800		histone H3, putative	0	-0.01	-0.16	-0.04	-0.31	-0.71	1	1	1	1	1		43
	Annotated Sequence	# Proteins	Master Protein Accessions			Protein Accessions	# Missed Cleavages	Ions Score	ptmRS: Best Site Probabilities
	sAPISAGIk	1	PBANKA_0108800		histone H3, putative	PBANKA_0108800.1-p1	0	43	S1(Phospho): 100
	sAPISAGIk	1	PBANKA_0108800		histone H3, putative	PBANKA_0108800.1-p1	0	42	S1(Phospho): 100
	sAPIsAGIk	1	PBANKA_0108800		histone H3, putative	PBANKA_0108800.1-p1	0	33	S5(Phospho): 100
	sAPIsAGIk	1	PBANKA_0108800		histone H3, putative	PBANKA_0108800.1-p1	0	31	S5(Phospho): 100
	sAPISAGIk	1	PBANKA_0108800		histone H3, putative	PBANKA_0108800.1-p1	0	30	S1(Phospho): 100
	sAPIsAGIk	1	PBANKA_0108800		histone H3, putative	PBANKA_0108800.1-p1	0	28	S5(Phospho): 100
	sAPISAGIk	1	PBANKA_0108800		histone H3, putative	PBANKA_0108800.1-p1	0	22	S1(Phospho): 100
DIQLAR	1xTMT6plex [N-Term]	1	PBANKA_0108800; PBANKA_1117100			0	0.01	-0.11	-0.08	-0.03	-0.15						Shared	16
	Annotated Sequence	# Proteins	Master Protein Accessions			Protein Accessions	# Missed Cleavages	Ions Score	ptmRS: Best Site Probabilities
	dIQLAR	2	PBANKA_0108800; PBANKA_1117100			PBANKA_0108800.1-p1; PBANKA_1117100.1-p1	0	16
STDLLIR	1xTMT6plex [N-Term]; 1xPhospho [S1(100)]	2	PBANKA_0108800; PBANKA_1117100			0	0.67	1.13	1.16	1.25	0.76	1	0.10641	0.0690241	0.0740219	0.914287	Shared	23
	Annotated Sequence	# Proteins	Master Protein Accessions			Protein Accessions	# Missed Cleavages	Ions Score	ptmRS: Best Site Probabilities
	sTDLLIR	2	PBANKA_0108800; PBANKA_1117100			PBANKA_0108800.1-p1; PBANKA_1117100.1-p1	0	23	S1(Phospho): 100
	sTDLLIR	2	PBANKA_0108800; PBANKA_1117100			PBANKA_0108800.1-p1; PBANKA_1117100.1-p1	0	22	S1(Phospho): 100
STDLLIR	1xTMT6plex [N-Term]	1	PBANKA_0108800; PBANKA_1117100			0	0.21	0.04	0	-0.03	-0.03						Shared	15
	Annotated Sequence	# Proteins	Master Protein Accessions			Protein Accessions	# Missed Cleavages	Ions Score	ptmRS: Best Site Probabilities
	sTDLLIR	2	PBANKA_0108800; PBANKA_1117100			PBANKA_0108800.1-p1; PBANKA_1117100.1-p1	0	15
YRPGTVALR	1xTMT6plex [N-Term]; 1xPhospho [T5(100)]	3	PBANKA_0108800; PBANKA_1117100			0	0.43	0.86	0.88	0.65	0.73	1	1	1	1	1	Shared	25
	Annotated Sequence	# Proteins	Master Protein Accessions			Protein Accessions	# Missed Cleavages	Ions Score	ptmRS: Best Site Probabilities
	yRPGtVALR	2	PBANKA_0108800; PBANKA_1117100			PBANKA_0108800.1-p1; PBANKA_1117100.1-p1	0	25	T5(Phospho): 100
	yRPGtVALR	2	PBANKA_0108800; PBANKA_1117100			PBANKA_0108800.1-p1; PBANKA_1117100.1-p1	0	24	T5(Phospho): 100
	yRPGtVALR	2	PBANKA_0108800; PBANKA_1117100			PBANKA_0108800.1-p1; PBANKA_1117100.1-p1	0	23	T5(Phospho): 100
RVTIMPK	1xTMT6plex [K7]; 1xTMT6plex [N-Term]; 1xPhospho [T3(100)]	1	PBANKA_0108800; PBANKA_1117100			1	0.31	0.18	0.32	0.18	-0.2						Shared	16
	Annotated Sequence	# Proteins	Master Protein Accessions			Protein Accessions	# Missed Cleavages	Ions Score	ptmRS: Best Site Probabilities
	rVtIMPk	2	PBANKA_0108800; PBANKA_1117100			PBANKA_0108800.1-p1; PBANKA_1117100.1-p1	1	16	T3(Phospho): 100
YRPGTVALR	1xTMT6plex [N-Term]	2	PBANKA_0108800; PBANKA_1117100			0											Shared	31
	Annotated Sequence	# Proteins	Master Protein Accessions			Protein Accessions	# Missed Cleavages	Ions Score	ptmRS: Best Site Probabilities
	yRPGTVALR	2	PBANKA_0108800; PBANKA_1117100			PBANKA_0108800.1-p1; PBANKA_1117100.1-p1	0	31
	yRPGTVALR	2	PBANKA_0108800; PBANKA_1117100			PBANKA_0108800.1-p1; PBANKA_1117100.1-p1	0	30
LKSGTNHLAQAINK	2xTMT6plex [K2; K14]; 1xTMT6plex [N-Term]; 1xPhospho [S3(99.6)]	3	PBANKA_0109200	SPT5	transcription elongation factor SPT5, putative	1	0.24	0.46	0.44	0.25	0.27	1	1	1	1	1		21
	Annotated Sequence	# Proteins	Master Protein Accessions			Protein Accessions	# Missed Cleavages	Ions Score	ptmRS: Best Site Probabilities
	lkSGtNHLAQAINk	1	PBANKA_0109200	SPT5	transcription elongation factor SPT5, putative	PBANKA_0109200.1-p1	1	21	S3(Phospho): 99.56
	lkSGtNHLAQAINk	1	PBANKA_0109200	SPT5	transcription elongation factor SPT5, putative	PBANKA_0109200.1-p1	1	21	S3(Phospho): 100
	lkSGtNHLAQAINk	1	PBANKA_0109200	SPT5	transcription elongation factor SPT5, putative	PBANKA_0109200.1-p1	1	19	S3(Phospho): 100
KNTFQSFIGK	2xTMT6plex [K1; K10]; 1xTMT6plex [N-Term]; 1xPhospho [T3(100)]	2	PBANKA_0109200	SPT5	transcription elongation factor SPT5, putative	1	-0.16	0.18	0.15	0.05	0.12							51
	Annotated Sequence	# Proteins	Master Protein Accessions			Protein Accessions	# Missed Cleavages	Ions Score	ptmRS: Best Site Probabilities
	kNtFQSFIGk	1	PBANKA_0109200	SPT5	transcription elongation factor SPT5, putative	PBANKA_0109200.1-p1	1	51	T3(Phospho): 100
	kNtFQSFIGk	1	PBANKA_0109200	SPT5	transcription elongation factor SPT5, putative	PBANKA_0109200.1-p1	1	33	T3(Phospho): 100
SHSTIHYDITNNNLDQIYPLMDK	1xTMT6plex [K23]; 1xTMT6plex [N-Term]; 1xPhospho [S3(99.7)]	2	PBANKA_0109200	SPT5	transcription elongation factor SPT5, putative	0	-0.42	-0.23	-0.34	-0.44	-0.14	1	1	1	1	1		35
	Annotated Sequence	# Proteins	Master Protein Accessions			Protein Accessions	# Missed Cleavages	Ions Score	ptmRS: Best Site Probabilities
	sHsTIHYDITNNNLDQIYPLMDk	1	PBANKA_0109200	SPT5	transcription elongation factor SPT5, putative	PBANKA_0109200.1-p1	0	35	S3(Phospho): 99.68
	sHsTIHYDITNNNLDQIYPLMDk	1	PBANKA_0109200	SPT5	transcription elongation factor SPT5, putative	PBANKA_0109200.1-p1	0	34	S3(Phospho): 99.6
LSSIDEALQIR	1xTMT6plex [N-Term]; 1xPhospho [S3(100)]	4	PBANKA_0109200	SPT5	transcription elongation factor SPT5, putative	0	0.32	0.26	0.39	0.38	0.13	1	1	1	1	1		52
	Annotated Sequence	# Proteins	Master Protein Accessions			Protein Accessions	# Missed Cleavages	Ions Score	ptmRS: Best Site Probabilities
	lSsIDEALQIR	1	PBANKA_0109200	SPT5	transcription elongation factor SPT5, putative	PBANKA_0109200.1-p1	0	52	S3(Phospho): 100
	lSsIDEALQIR	1	PBANKA_0109200	SPT5	transcription elongation factor SPT5, putative	PBANKA_0109200.1-p1	0	52	S3(Phospho): 100
	lSsIDEALQIR	1	PBANKA_0109200	SPT5	transcription elongation factor SPT5, putative	PBANKA_0109200.1-p1	0	37	S2(Phospho): 99.63
	lSsIDEALQIR	1	PBANKA_0109200	SPT5	transcription elongation factor SPT5, putative	PBANKA_0109200.1-p1	0	33	S2(Phospho): 99.63
NNTNEEDINLHISKSFINK	2xTMT6plex [K14; K19]; 1xTMT6plex [N-Term]; 1xPhospho [S15(100)]	1	PBANKA_0109200	SPT5	transcription elongation factor SPT5, putative	1	0.23	0.1	0.31	0.26	0.3							32
	Annotated Sequence	# Proteins	Master Protein Accessions			Protein Accessions	# Missed Cleavages	Ions Score	ptmRS: Best Site Probabilities
	nNTNEEDINLHISksFINk	1	PBANKA_0109200	SPT5	transcription elongation factor SPT5, putative	PBANKA_0109200.1-p1	1	32	S15(Phospho): 100
LSSIDEALQIRR	1xTMT6plex [N-Term]; 1xPhospho [S3(99.5)]	1	PBANKA_0109200	SPT5	transcription elongation factor SPT5, putative	1	-0.48	0.69	0.66	0.08	0.32							18
	Annotated Sequence	# Proteins	Master Protein Accessions			Protein Accessions	# Missed Cleavages	Ions Score	ptmRS: Best Site Probabilities
	lSsIDEALQIRR	1	PBANKA_0109200	SPT5	transcription elongation factor SPT5, putative	PBANKA_0109200.1-p1	1	18	S3(Phospho): 99.54
NYKSADNMDDYYTSNK	2xTMT6plex [K3; K16]; 1xTMT6plex [N-Term]; 1xPhospho [S4(100)]	2	PBANKA_0109200	SPT5	transcription elongation factor SPT5, putative	1	-0.2	-0.48	-0.4	-0.21	-0.28	1	1	1	1	1		28
	Annotated Sequence	# Proteins	Master Protein Accessions			Protein Accessions	# Missed Cleavages	Ions Score	ptmRS: Best Site Probabilities
	nYksADNMDDYYTSNk	1	PBANKA_0109200	SPT5	transcription elongation factor SPT5, putative	PBANKA_0109200.1-p1	1	28	S4(Phospho): 100
	nYksADNMDDYYTSNk	1	PBANKA_0109200	SPT5	transcription elongation factor SPT5, putative	PBANKA_0109200.1-p1	1	27	S4(Phospho): 100
YVSTFLDTEAQVGDEEDEEEYASSYVDEFEEAKR	1xTMT6plex [K33]; 1xTMT6plex [N-Term]; 1xPhospho [S/Y/T]	1	PBANKA_0109200	SPT5	transcription elongation factor SPT5, putative	1	-0.45	-0.52	-0.47	-0.49	-0.64							26
	Annotated Sequence	# Proteins	Master Protein Accessions			Protein Accessions	# Missed Cleavages	Ions Score	ptmRS: Best Site Probabilities
	yVSTFLDTEAQVGDEEDEEEYASsYVDEFEEAkR	1	PBANKA_0109200	SPT5	transcription elongation factor SPT5, putative	PBANKA_0109200.1-p1	1	26	S23(Phospho): 50; S24(Phospho): 50
KTSPTYSEYK	2xTMT6plex [K1; K10]; 1xTMT6plex [N-Term]; 1xPhospho [T2(99.7)]	1	PBANKA_0109200	SPT5	transcription elongation factor SPT5, putative	1	-0.2	-0.65	-0.28	-0.34	-0.11							16
	Annotated Sequence	# Proteins	Master Protein Accessions			Protein Accessions	# Missed Cleavages	Ions Score	ptmRS: Best Site Probabilities
	kTsPTYSEYk	1	PBANKA_0109200	SPT5	transcription elongation factor SPT5, putative	PBANKA_0109200.1-p1	1	16	T2(Phospho): 99.72
YVSTFLDTEAQVGDEEDEEEYASSYVDEFEEAK	1xTMT6plex [K33]; 1xTMT6plex [N-Term]; 1xPhospho [S23(98.4)]	2	PBANKA_0109200	SPT5	transcription elongation factor SPT5, putative	0	-0.43	-0.63	-0.75	-0.31	-0.88							81
	Annotated Sequence	# Proteins	Master Protein Accessions			Protein Accessions	# Missed Cleavages	Ions Score	ptmRS: Best Site Probabilities
	yVSTFLDTEAQVGDEEDEEEYAsSYVDEFEEAk	1	PBANKA_0109200	SPT5	transcription elongation factor SPT5, putative	PBANKA_0109200.1-p1	0	81	S23(Phospho): 98.38
	yVSTFLDTEAQVGDEEDEEEYASSyVDEFEEAk	1	PBANKA_0109200	SPT5	transcription elongation factor SPT5, putative	PBANKA_0109200.1-p1	0	63	Y21(Phospho): 33.26; S23(Phospho): 33.26; S24(Phospho): 33.26
STFSSNDVLIK	1xTMT6plex [K11]; 1xTMT6plex [N-Term]; 1xPhospho [S4(99.7)]	1	PBANKA_0112100	ApiAP2	AP2 domain transcription factor, putative	0	-0.59	-0.2	0.26	-0.49	-0.25							42
	Annotated Sequence	# Proteins	Master Protein Accessions			Protein Accessions	# Missed Cleavages	Ions Score	ptmRS: Best Site Probabilities
	sTFsSNDVLIk	1	PBANKA_0112100	ApiAP2	AP2 domain transcription factor, putative	PBANKA_0112100.1-p1	0	42	S4(Phospho): 99.73
NNEIISK	1xTMT6plex [K7]; 1xTMT6plex [N-Term]; 1xPhospho [S6(100)]	1	PBANKA_0112100	ApiAP2	AP2 domain transcription factor, putative	0	-0.15	0.18	0.2	-0.21	-0.17							14
	Annotated Sequence	# Proteins	Master Protein Accessions			Protein Accessions	# Missed Cleavages	Ions Score	ptmRS: Best Site Probabilities
	nNEIIsk	1	PBANKA_0112100	ApiAP2	AP2 domain transcription factor, putative	PBANKA_0112100.1-p1	0	14	S6(Phospho): 100
RHSSIDEK	1xTMT6plex [K8]; 1xTMT6plex [N-Term]; 1xPhospho [S3(100)]	2	PBANKA_0112100	ApiAP2	AP2 domain transcription factor, putative	1	-0.83	-0.74	-0.93	-0.49	-0.58	1	1	1	1	1		22
	Annotated Sequence	# Proteins	Master Protein Accessions			Protein Accessions	# Missed Cleavages	Ions Score	ptmRS: Best Site Probabilities
	rHsSIDEk	1	PBANKA_0112100	ApiAP2	AP2 domain transcription factor, putative	PBANKA_0112100.1-p1	1	22	S3(Phospho): 100
	rHsSIDEk	1	PBANKA_0112100	ApiAP2	AP2 domain transcription factor, putative	PBANKA_0112100.1-p1	1	16	S3(Phospho): 100
NLNTPNEDEPSIPSTDDNTR	1xTMT6plex [N-Term]; 1xPhospho [S11(100)]	3	PBANKA_0201600	ETRAMP	early transcribed membrane protein	0	0.01	0.07	-0.19	-0.18	0.05	1	1	1	1	1		68
	Annotated Sequence	# Proteins	Master Protein Accessions			Protein Accessions	# Missed Cleavages	Ions Score	ptmRS: Best Site Probabilities
	nLNTPNEDEPsIPSTDDNTR	1	PBANKA_0201600	ETRAMP	early transcribed membrane protein	PBANKA_0201600.1-p1	0	68	S11(Phospho): 100
	nLNTPNEDEPSIPStDDNTR	1	PBANKA_0201600	ETRAMP	early transcribed membrane protein	PBANKA_0201600.1-p1	0	25	S14(Phospho): 49.88; T15(Phospho): 49.88
	nLNTPNEDEPsIPSTDDNTR	1	PBANKA_0201600	ETRAMP	early transcribed membrane protein	PBANKA_0201600.1-p1	0	18	S11(Phospho): 99.99
IPNIPNIPNSSGNAQSPTVSGNSIEQTAETSNVATR	1xTMT6plex [N-Term]; 1xPhospho [S23(100)]	2	PBANKA_0201600	ETRAMP	early transcribed membrane protein	0	-0.13	-0.33	-0.18	-0.14	-0.14	1	1	1	1	1		61
	Annotated Sequence	# Proteins	Master Protein Accessions			Protein Accessions	# Missed Cleavages	Ions Score	ptmRS: Best Site Probabilities
	iPNIPNIPNSSGNAQSPTVSGNsIEQTAETSNVATR	1	PBANKA_0201600	ETRAMP	early transcribed membrane protein	PBANKA_0201600.1-p1	0	61	S23(Phospho): 99.98
	iPNIPNIPNSSGNAQSPTVSGNsIEQTAETSNVATR	1	PBANKA_0201600	ETRAMP	early transcribed membrane protein	PBANKA_0201600.1-p1	0	52	S23(Phospho): 99.07
ASEESNEQPALDLPIPENTEDIENTN	1xTMT6plex [N-Term]	2	PBANKA_0201600	ETRAMP	early transcribed membrane protein	0	-0.39	-0.07	-0.12	0.14	-0.34	1	1	1	1	1		46
	Annotated Sequence	# Proteins	Master Protein Accessions			Protein Accessions	# Missed Cleavages	Ions Score	ptmRS: Best Site Probabilities
	aSEESNEQPALDLPIPENTEDIENTN	1	PBANKA_0201600	ETRAMP	early transcribed membrane protein	PBANKA_0201600.1-p1	0	46
	aSEESNEQPALDLPIPENTEDIENTN	1	PBANKA_0201600	ETRAMP	early transcribed membrane protein	PBANKA_0201600.1-p1	0	40
KNLNTPNEDEPSIPSTDDNTR	1xTMT6plex [K1]; 1xTMT6plex [N-Term]; 1xPhospho [S12(100)]	2	PBANKA_0201600	ETRAMP	early transcribed membrane protein	1	-0.19	-0.09	-0.15	-0.07	-0.25	1	1	1	1	1		50
	Annotated Sequence	# Proteins	Master Protein Accessions			Protein Accessions	# Missed Cleavages	Ions Score	ptmRS: Best Site Probabilities
	kNLNTPNEDEPsIPSTDDNTR	1	PBANKA_0201600	ETRAMP	early transcribed membrane protein	PBANKA_0201600.1-p1	1	50	S12(Phospho): 100
	kNLNTPNEDEPsIPSTDDNTR	1	PBANKA_0201600	ETRAMP	early transcribed membrane protein	PBANKA_0201600.1-p1	1	33	S12(Phospho): 99.11
ASEESNEQPALDLPIPENTEDIENTN	1xTMT6plex [N-Term]; 1xPhospho [T25(100)]	4	PBANKA_0201600	ETRAMP	early transcribed membrane protein	0	-0.23	0.04	0.02	0.22	-0.02	1	1	1	1	1		57
	Annotated Sequence	# Proteins	Master Protein Accessions			Protein Accessions	# Missed Cleavages	Ions Score	ptmRS: Best Site Probabilities
	aSEESNEQPALDLPIPENTEDIENtN	1	PBANKA_0201600	ETRAMP	early transcribed membrane protein	PBANKA_0201600.1-p1	0	57	T25(Phospho): 100
	aSEEsNEQPALDLPIPENTEDIENTN	1	PBANKA_0201600	ETRAMP	early transcribed membrane protein	PBANKA_0201600.1-p1	0	31	S5(Phospho): 100
	aSEESNEQPALDLPIPENTEDIENtN	1	PBANKA_0201600	ETRAMP	early transcribed membrane protein	PBANKA_0201600.1-p1	0	30	T25(Phospho): 99.99
	aSEEsNEQPALDLPIPENTEDIENTN	1	PBANKA_0201600	ETRAMP	early transcribed membrane protein	PBANKA_0201600.1-p1	0	14	S5(Phospho): 100
HNSFLNNNNMTK	1xOxidation [M10]; 1xTMT6plex [K12]; 1xTMT6plex [N-Term]; 1xPhospho [S3(100)]	3	PBANKA_0202500		P-loop containing nucleoside triphosphate hydrolase, putative	0	0.23	0.26	-0.09	0.09	0.1	1	1	1	1	1		26
	Annotated Sequence	# Proteins	Master Protein Accessions			Protein Accessions	# Missed Cleavages	Ions Score	ptmRS: Best Site Probabilities
	hNsFLNNNNmTk	1	PBANKA_0202500		P-loop containing nucleoside triphosphate hydrolase, putative	PBANKA_0202500.1-p1	0	26	S3(Phospho): 100
	hNsFLNNNNmTk	1	PBANKA_0202500		P-loop containing nucleoside triphosphate hydrolase, putative	PBANKA_0202500.1-p1	0	14	S3(Phospho): 100
	hNsFLNNNNmTk	1	PBANKA_0202500		P-loop containing nucleoside triphosphate hydrolase, putative	PBANKA_0202500.1-p1	0	14	S3(Phospho): 100
HNSFLNNNNMTK	1xTMT6plex [K12]; 1xTMT6plex [N-Term]; 1xPhospho [S3(100)]	2	PBANKA_0202500		P-loop containing nucleoside triphosphate hydrolase, putative	0	0.31	0.16	0.28	0.09	0.21	1	1	1	1	1		27
	Annotated Sequence	# Proteins	Master Protein Accessions			Protein Accessions	# Missed Cleavages	Ions Score	ptmRS: Best Site Probabilities
	hNsFLNNNNMTk	1	PBANKA_0202500		P-loop containing nucleoside triphosphate hydrolase, putative	PBANKA_0202500.1-p1	0	27	S3(Phospho): 100
	hNsFLNNNNMTk	1	PBANKA_0202500		P-loop containing nucleoside triphosphate hydrolase, putative	PBANKA_0202500.1-p1	0	23	S3(Phospho): 100
NQSSNILLDHIIPQTK	1xTMT6plex [K16]; 1xTMT6plex [N-Term]; 1xPhospho [S/T]	2	PBANKA_0202500		P-loop containing nucleoside triphosphate hydrolase, putative	0	-0.15	0.16	0.18	0.06	0.17	1	1	1	1	1		35
	Annotated Sequence	# Proteins	Master Protein Accessions			Protein Accessions	# Missed Cleavages	Ions Score	ptmRS: Best Site Probabilities
	nQSsNILLDHIIPQTk	1	PBANKA_0202500		P-loop containing nucleoside triphosphate hydrolase, putative	PBANKA_0202500.1-p1	0	35	S3(Phospho): 50; S4(Phospho): 50
	nQSsNILLDHIIPQTk	1	PBANKA_0202500		P-loop containing nucleoside triphosphate hydrolase, putative	PBANKA_0202500.1-p1	0	31	S3(Phospho): 50; S4(Phospho): 50
MPTENVNFVEK	1xTMT6plex [K11]; 1xTMT6plex [N-Term]; 1xPhospho [T3(100)]	1	PBANKA_0202500		P-loop containing nucleoside triphosphate hydrolase, putative	0	0.16	0.25	0.17	-0.15	0.65							21
	Annotated Sequence	# Proteins	Master Protein Accessions			Protein Accessions	# Missed Cleavages	Ions Score	ptmRS: Best Site Probabilities
	mPtENVNFVEk	1	PBANKA_0202500		P-loop containing nucleoside triphosphate hydrolase, putative	PBANKA_0202500.1-p1	0	21	T3(Phospho): 100
SITNQNLNKHNSFLNNNNMTK	2xTMT6plex [K9; K21]; 1xTMT6plex [N-Term]; 1xPhospho [S12(100)]	1	PBANKA_0202500		P-loop containing nucleoside triphosphate hydrolase, putative	1	-0.05	0.41	0.27	0.26	0.34							18
	Annotated Sequence	# Proteins	Master Protein Accessions			Protein Accessions	# Missed Cleavages	Ions Score	ptmRS: Best Site Probabilities
	sITNQNLNkHNsFLNNNNMTk	1	PBANKA_0202500		P-loop containing nucleoside triphosphate hydrolase, putative	PBANKA_0202500.1-p1	1	18	S12(Phospho): 100
YKTQYYDENK	2xTMT6plex [K2; K10]; 1xTMT6plex [N-Term]; 1xPhospho [T3(100)]	1	PBANKA_0202700		kinesin-8, putative	1	0.14	0.06	0.39	0.48	0.05							17
	Annotated Sequence	# Proteins	Master Protein Accessions			Protein Accessions	# Missed Cleavages	Ions Score	ptmRS: Best Site Probabilities
	yktQYYDENk	1	PBANKA_0202700		kinesin-8, putative	PBANKA_0202700.1-p1	1	17	T3(Phospho): 100
TQYYDENKLSPLYK	2xTMT6plex [K8; K14]; 1xTMT6plex [N-Term]; 1xPhospho [S10(100)]	2	PBANKA_0202700		kinesin-8, putative	1	-0.39	-0.61	-0.44	-0.36	-0.35	1	1	1	1	1		27
	Annotated Sequence	# Proteins	Master Protein Accessions			Protein Accessions	# Missed Cleavages	Ions Score	ptmRS: Best Site Probabilities
	tQYYDENkLsPLYk	1	PBANKA_0202700		kinesin-8, putative	PBANKA_0202700.1-p1	1	27	S10(Phospho): 100
	tQYYDENkLsPLYk	1	PBANKA_0202700		kinesin-8, putative	PBANKA_0202700.1-p1	1	24	S10(Phospho): 100
YSSFESDVQASK	1xTMT6plex [K12]; 1xTMT6plex [N-Term]; 2xPhospho [S/Y]	1	PBANKA_0202700		kinesin-8, putative	0											No Quan Values	16
	Annotated Sequence	# Proteins	Master Protein Accessions			Protein Accessions	# Missed Cleavages	Ions Score	ptmRS: Best Site Probabilities
	ySSFEsDVQASk	1	PBANKA_0202700		kinesin-8, putative	PBANKA_0202700.1-p1	0	16	S2(Phospho): 66.67; S3(Phospho): 66.67; S6(Phospho): 66.67
NESIKSFK	2xTMT6plex [K5; K8]; 1xTMT6plex [N-Term]; 1xPhospho [S3(100)]	1	PBANKA_0202700		kinesin-8, putative	1	-0.12	-0.24	-0.16	-0.19	-0.23							15
	Annotated Sequence	# Proteins	Master Protein Accessions			Protein Accessions	# Missed Cleavages	Ions Score	ptmRS: Best Site Probabilities
	nEsIkSFk	1	PBANKA_0202700		kinesin-8, putative	PBANKA_0202700.1-p1	1	15	S3(Phospho): 100
THHFIISESNSTNYDYYDSVK	1xTMT6plex [K21]; 1xTMT6plex [N-Term]; 1xPhospho [S7(98)]	1	PBANKA_0202700		kinesin-8, putative	0	-0.35	-0.28	-0.36	-0.44	-0.01							31
	Annotated Sequence	# Proteins	Master Protein Accessions			Protein Accessions	# Missed Cleavages	Ions Score	ptmRS: Best Site Probabilities
	tHHFIISESNSTNyDYYDSVk	1	PBANKA_0202700		kinesin-8, putative	PBANKA_0202700.1-p1	0	31	S7(Phospho): 98
YTNSIEHQNMMNAHNEDLSTYQK	1xTMT6plex [K23]; 1xTMT6plex [N-Term]; 1xPhospho [S4(99.1)]	1	PBANKA_0202700		kinesin-8, putative	0	-0.31	-0.24	-0.18	-0.34	-0.03							24
	Annotated Sequence	# Proteins	Master Protein Accessions			Protein Accessions	# Missed Cleavages	Ions Score	ptmRS: Best Site Probabilities
	yTNsIEHQNMMNAHNEDLSTYQk	1	PBANKA_0202700		kinesin-8, putative	PBANKA_0202700.1-p1	0	24	S4(Phospho): 99.13
RDVLPDLSLER	1xTMT6plex [N-Term]; 1xPhospho [S8(100)]	1	PBANKA_0202700		kinesin-8, putative	1	-0.16	0.11	0.17	-0.37	-0.46							35
	Annotated Sequence	# Proteins	Master Protein Accessions			Protein Accessions	# Missed Cleavages	Ions Score	ptmRS: Best Site Probabilities
	rDVLPDLsLER	1	PBANKA_0202700		kinesin-8, putative	PBANKA_0202700.1-p1	1	35	S8(Phospho): 100
YSSFESDVQASK	1xTMT6plex [K12]; 1xTMT6plex [N-Term]; 1xPhospho [S3(100)]	4	PBANKA_0202700		kinesin-8, putative	0	-0.45	-0.34	-0.24	-0.35	-0.21	1	1	1	1	1		40
	Annotated Sequence	# Proteins	Master Protein Accessions			Protein Accessions	# Missed Cleavages	Ions Score	ptmRS: Best Site Probabilities
	ySsFESDVQASk	1	PBANKA_0202700		kinesin-8, putative	PBANKA_0202700.1-p1	0	40	S3(Phospho): 100
	ySsFESDVQASk	1	PBANKA_0202700		kinesin-8, putative	PBANKA_0202700.1-p1	0	39	S3(Phospho): 100
	ySsFESDVQASk	1	PBANKA_0202700		kinesin-8, putative	PBANKA_0202700.1-p1	0	29	S3(Phospho): 99.69
	ySsFESDVQASk	1	PBANKA_0202700		kinesin-8, putative	PBANKA_0202700.1-p1	0	18	S3(Phospho): 99.67
TQEPTDANR	1xTMT6plex [N-Term]	1	PBANKA_0202700		kinesin-8, putative	0	-0.09	0.27	0.26	0.59	1.24							14
	Annotated Sequence	# Proteins	Master Protein Accessions			Protein Accessions	# Missed Cleavages	Ions Score	ptmRS: Best Site Probabilities
	tQEPTDANR	1	PBANKA_0202700		kinesin-8, putative	PBANKA_0202700.1-p1	0	14
ENNYSLER	1xTMT6plex [N-Term]; 1xPhospho [S5(100)]	2	PBANKA_0202700		kinesin-8, putative	0	0.25	0.35	0.56	0.46	0.4	1	1	1	1	1		23
	Annotated Sequence	# Proteins	Master Protein Accessions			Protein Accessions	# Missed Cleavages	Ions Score	ptmRS: Best Site Probabilities
	eNNYsLER	1	PBANKA_0202700		kinesin-8, putative	PBANKA_0202700.1-p1	0	23	S5(Phospho): 100
	eNNYsLER	1	PBANKA_0202700		kinesin-8, putative	PBANKA_0202700.1-p1	0	22	S5(Phospho): 100
NLSSSGIPSRYSSFESDVQASK	1xTMT6plex [K22]; 1xTMT6plex [N-Term]; 2xPhospho [S13(99.6); S/Y]	4	PBANKA_0202700		kinesin-8, putative	1	-0.67	-0.19	-0.37	-0.34	-0.27							19
	Annotated Sequence	# Proteins	Master Protein Accessions			Protein Accessions	# Missed Cleavages	Ions Score	ptmRS: Best Site Probabilities
	nLSSSGIPSRYssFESDVQASk	1	PBANKA_0202700		kinesin-8, putative	PBANKA_0202700.1-p1	1	19	S12(Phospho): 98.94; S13(Phospho): 98.94
	nLSSSGIPSRYssFESDVQASk	1	PBANKA_0202700		kinesin-8, putative	PBANKA_0202700.1-p1	1	19	S9(Phospho): 99.11; S13(Phospho): 99.1
	nLSSSGIPSRYssFESDVQASk	1	PBANKA_0202700		kinesin-8, putative	PBANKA_0202700.1-p1	1	16	S9(Phospho): 50.23; S12(Phospho): 50.23; S13(Phospho): 99.55
	nLSSSGIPSRYSsFEsDVQASk	1	PBANKA_0202700		kinesin-8, putative	PBANKA_0202700.1-p1	1	15	S9(Phospho): 66.66; S12(Phospho): 66.66; S13(Phospho): 66.66
QNSLNGFTPK	1xTMT6plex [K10]; 1xTMT6plex [N-Term]; 1xPhospho [S3(100)]	3	PBANKA_0202700		kinesin-8, putative	0	0.02	0.01	-0.07	-0.26	0.04	1	1	1	1	1		26
	Annotated Sequence	# Proteins	Master Protein Accessions			Protein Accessions	# Missed Cleavages	Ions Score	ptmRS: Best Site Probabilities
	qNsLNGFTPk	1	PBANKA_0202700		kinesin-8, putative	PBANKA_0202700.1-p1	0	26	S3(Phospho): 100
	qNsLNGFTPk	1	PBANKA_0202700		kinesin-8, putative	PBANKA_0202700.1-p1	0	25	S3(Phospho): 100
	qNsLNGFTPk	1	PBANKA_0202700		kinesin-8, putative	PBANKA_0202700.1-p1	0	24	S3(Phospho): 100
SDILDNEEYNLQEHSNNSCYEKNESIK	1xCarbamidomethyl [C19]; 2xTMT6plex [K22; K27]; 1xTMT6plex [N-Term]; 1xPhospho [S25(100)]	2	PBANKA_0202700		kinesin-8, putative	1	-0.23	-0.25	-0.14	-0.23	-0.24	1	1	1	1	1		53
	Annotated Sequence	# Proteins	Master Protein Accessions			Protein Accessions	# Missed Cleavages	Ions Score	ptmRS: Best Site Probabilities
	sDILDNEEYNLQEHSNNScYEkNEsIk	1	PBANKA_0202700		kinesin-8, putative	PBANKA_0202700.1-p1	1	53	S25(Phospho): 100
	sDILDNEEYNLQEHSNNScYEkNEsIk	1	PBANKA_0202700		kinesin-8, putative	PBANKA_0202700.1-p1	1	50	S25(Phospho): 100
SDVEYTDQESDNNNSCK	1xCarbamidomethyl [C16]; 1xTMT6plex [K17]; 1xTMT6plex [N-Term]; 1xPhospho [S10(100)]	2	PBANKA_0202700		kinesin-8, putative	0	0.07	-0.1	-0.27	-0.27	-0.2	1	1	1	1	1		48
	Annotated Sequence	# Proteins	Master Protein Accessions			Protein Accessions	# Missed Cleavages	Ions Score	ptmRS: Best Site Probabilities
	sDVEYTDQEsDNNNSck	1	PBANKA_0202700		kinesin-8, putative	PBANKA_0202700.1-p1	0	48	S10(Phospho): 100
	sDVEYTDQEsDNNNSck	1	PBANKA_0202700		kinesin-8, putative	PBANKA_0202700.1-p1	0	41	S10(Phospho): 100
DYQNNNNYYYTDKEIDIHSPYAR	1xTMT6plex [K13]; 1xTMT6plex [N-Term]; 1xPhospho [T11(100)]	3	PBANKA_0202700		kinesin-8, putative	1	-0.28	-0.26	-0.58	-0.37	-0.75							35
	Annotated Sequence	# Proteins	Master Protein Accessions			Protein Accessions	# Missed Cleavages	Ions Score	ptmRS: Best Site Probabilities
	dYQNNNNYYYtDkEIDIHSPYAR	1	PBANKA_0202700		kinesin-8, putative	PBANKA_0202700.1-p1	1	35	T11(Phospho): 100
	dYQNNNNyYYTDkEIDIHSPYAR	1	PBANKA_0202700		kinesin-8, putative	PBANKA_0202700.1-p1	1	19	T11(Phospho): 99.99
	dYQNNNNYYYTDkEIDIHsPYAR	1	PBANKA_0202700		kinesin-8, putative	PBANKA_0202700.1-p1	1	16	S19(Phospho): 100
STIYNYIHKDSFPNYEYDDTETK	2xTMT6plex [K9; K23]; 1xTMT6plex [N-Term]; 1xPhospho [S11(100)]	7	PBANKA_0202700		kinesin-8, putative	1	-0.06	-0.16	-0.23	-0.08	0.02	1	1	1	1	1		58
	Annotated Sequence	# Proteins	Master Protein Accessions			Protein Accessions	# Missed Cleavages	Ions Score	ptmRS: Best Site Probabilities
	sTIYNYIHkDsFPNYEYDDTETk	1	PBANKA_0202700		kinesin-8, putative	PBANKA_0202700.1-p1	1	58	S11(Phospho): 100
	sTIYNYIHkDsFPNYEYDDTETk	1	PBANKA_0202700		kinesin-8, putative	PBANKA_0202700.1-p1	1	58	S11(Phospho): 100
	sTIYNYIHkDsFPNYEYDDTETk	1	PBANKA_0202700		kinesin-8, putative	PBANKA_0202700.1-p1	1	51	S11(Phospho): 100
	sTIYNYIHkDSFPNyEYDDTETk	1	PBANKA_0202700		kinesin-8, putative	PBANKA_0202700.1-p1	1	46	S11(Phospho): 50; Y15(Phospho): 50
	sTIYNYIHkDsFPNYEYDDTETk	1	PBANKA_0202700		kinesin-8, putative	PBANKA_0202700.1-p1	1	37	S11(Phospho): 100
	sTIYNYIHkDsFPNYEYDDTETk	1	PBANKA_0202700		kinesin-8, putative	PBANKA_0202700.1-p1	1	33	S11(Phospho): 99.99
	sTIYNYIHkDSFPNYEYDDtETk	1	PBANKA_0202700		kinesin-8, putative	PBANKA_0202700.1-p1	1	16	S11(Phospho): 99.97
NVVTSNSVVVK	1xTMT6plex [K11]; 1xTMT6plex [N-Term]; 1xPhospho [S7(100)]	1	PBANKA_0202700		kinesin-8, putative	0	0.29	0.51	0.49	0.61	0.3							38
	Annotated Sequence	# Proteins	Master Protein Accessions			Protein Accessions	# Missed Cleavages	Ions Score	ptmRS: Best Site Probabilities
	nVVTSNsVVVk	1	PBANKA_0202700		kinesin-8, putative	PBANKA_0202700.1-p1	0	38	S7(Phospho): 100
LNSNGDNHLINLK	1xTMT6plex [K13]; 1xTMT6plex [N-Term]; 1xPhospho [S3(100)]	2	PBANKA_0202700		kinesin-8, putative	0	-0.45	-0.44	-0.31	-0.45	-0.41	1	1	1	1	1		25
	Annotated Sequence	# Proteins	Master Protein Accessions			Protein Accessions	# Missed Cleavages	Ions Score	ptmRS: Best Site Probabilities
	lNsNGDNHLINLk	1	PBANKA_0202700		kinesin-8, putative	PBANKA_0202700.1-p1	0	25	S3(Phospho): 100
	lNsNGDNHLINLk	1	PBANKA_0202700		kinesin-8, putative	PBANKA_0202700.1-p1	0	14	S3(Phospho): 100
YFSNNSTYK	1xTMT6plex [K9]; 1xTMT6plex [N-Term]; 1xPhospho [S3(100)]	3	PBANKA_0202700		kinesin-8, putative	0	-0.42	0.02	0.1	-0.28	-0.1	1	1	1	1	1		31
	Annotated Sequence	# Proteins	Master Protein Accessions			Protein Accessions	# Missed Cleavages	Ions Score	ptmRS: Best Site Probabilities
	yFsNNSTYk	1	PBANKA_0202700		kinesin-8, putative	PBANKA_0202700.1-p1	0	31	S3(Phospho): 100
	yFsNNSTYk	1	PBANKA_0202700		kinesin-8, putative	PBANKA_0202700.1-p1	0	29	S3(Phospho): 100
	yFsNNSTYk	1	PBANKA_0202700		kinesin-8, putative	PBANKA_0202700.1-p1	0	28	S3(Phospho): 100
VGETSDIWLENNLTSTTFIK	1xTMT6plex [K20]; 1xTMT6plex [N-Term]; 1xPhospho [S15(99)]	2	PBANKA_0202900		transcription initiation factor TFIIB, putative	0	0.03	-0.17	-0.18	-0.15	-0.6							52
	Annotated Sequence	# Proteins	Master Protein Accessions			Protein Accessions	# Missed Cleavages	Ions Score	ptmRS: Best Site Probabilities
	vGETSDIWLENNLTsTTFIk	1	PBANKA_0202900		transcription initiation factor TFIIB, putative	PBANKA_0202900.1-p1	0	52	S15(Phospho): 98.99
	vGETSDIWLENNLTStTFIk	1	PBANKA_0202900		transcription initiation factor TFIIB, putative	PBANKA_0202900.1-p1	0	50	S15(Phospho): 99.12
NLFLSPSFGK	1xTMT6plex [K10]; 1xTMT6plex [N-Term]; 1xPhospho [S7(100)]	2	PBANKA_0202900		transcription initiation factor TFIIB, putative	0	-0.43	-0.08	-0.27	-0.14	-0.11							29
	Annotated Sequence	# Proteins	Master Protein Accessions			Protein Accessions	# Missed Cleavages	Ions Score	ptmRS: Best Site Probabilities
	nLFLSPsFGk	1	PBANKA_0202900		transcription initiation factor TFIIB, putative	PBANKA_0202900.1-p1	0	29	S7(Phospho): 100
	nLFLSPsFGk	1	PBANKA_0202900		transcription initiation factor TFIIB, putative	PBANKA_0202900.1-p1	0	25	S7(Phospho): 100
SNALDEACLELSEEPTNEEIMKEEVENVETQFANWK	1xCarbamidomethyl [C8]; 2xTMT6plex [K22; K36]; 1xTMT6plex [N-Term]; 1xPhospho [S1(100)]	1	PBANKA_0203000		chromatin assembly factor 1 protein WD4 domain, putative	1											No Quan Values	15
	Annotated Sequence	# Proteins	Master Protein Accessions			Protein Accessions	# Missed Cleavages	Ions Score	ptmRS: Best Site Probabilities
	sNALDEAcLELSEEPTNEEIMkEEVENVETQFANWk	1	PBANKA_0203000		chromatin assembly factor 1 protein WD4 domain, putative	PBANKA_0203000.1-p1	1	15	S1(Phospho): 100
AIDGNLHLFDINKHSIDDTTNSDSR	1xTMT6plex [K13]; 1xTMT6plex [N-Term]; 1xPhospho [S15(100)]	1	PBANKA_0203000		chromatin assembly factor 1 protein WD4 domain, putative	1	-0.03	-0.06	-0.33	0.1	-0.14							23
	Annotated Sequence	# Proteins	Master Protein Accessions			Protein Accessions	# Missed Cleavages	Ions Score	ptmRS: Best Site Probabilities
	aIDGNLHLFDINkHsIDDTTNSDSR	1	PBANKA_0203000		chromatin assembly factor 1 protein WD4 domain, putative	PBANKA_0203000.1-p1	1	23	S15(Phospho): 100
INESYEGFDFCPEK	1xCarbamidomethyl [C11]; 1xTMT6plex [K14]; 1xTMT6plex [N-Term]; 1xPhospho [S4(100)]	2	PBANKA_0203000		chromatin assembly factor 1 protein WD4 domain, putative	0	-0.22	-0.18	0.12	-0.07	-0.27							52
	Annotated Sequence	# Proteins	Master Protein Accessions			Protein Accessions	# Missed Cleavages	Ions Score	ptmRS: Best Site Probabilities
	iNEsYEGFDFcPEk	1	PBANKA_0203000		chromatin assembly factor 1 protein WD4 domain, putative	PBANKA_0203000.1-p1	0	52	S4(Phospho): 100
	iNEsYEGFDFcPEk	1	PBANKA_0203000		chromatin assembly factor 1 protein WD4 domain, putative	PBANKA_0203000.1-p1	0	30	S4(Phospho): 100
TNSGLLYDFVCR	1xCarbamidomethyl [C11]; 1xTMT6plex [N-Term]; 1xPhospho [S3(100)]	4	PBANKA_0203000		chromatin assembly factor 1 protein WD4 domain, putative	0	-0.65	-0.24	-0.28	-0.45	-0.73	1	1	1	1	1		63
	Annotated Sequence	# Proteins	Master Protein Accessions			Protein Accessions	# Missed Cleavages	Ions Score	ptmRS: Best Site Probabilities
	tNsGLLYDFVcR	1	PBANKA_0203000		chromatin assembly factor 1 protein WD4 domain, putative	PBANKA_0203000.1-p1	0	63	S3(Phospho): 99.76
	tNsGLLYDFVcR	1	PBANKA_0203000		chromatin assembly factor 1 protein WD4 domain, putative	PBANKA_0203000.1-p1	0	52	S3(Phospho): 100
	tNsGLLYDFVcR	1	PBANKA_0203000		chromatin assembly factor 1 protein WD4 domain, putative	PBANKA_0203000.1-p1	0	51	S3(Phospho): 100
	tNsGLLYDFVcR	1	PBANKA_0203000		chromatin assembly factor 1 protein WD4 domain, putative	PBANKA_0203000.1-p1	0	49	S3(Phospho): 99.82
MFIGSTAEDNTLQFWQLK	1xTMT6plex [K18]; 1xTMT6plex [N-Term]; 1xPhospho [S5(99.6)]	2	PBANKA_0203000		chromatin assembly factor 1 protein WD4 domain, putative	0	-0.54	-0.15	-0.39	-0.11	-0.87							48
	Annotated Sequence	# Proteins	Master Protein Accessions			Protein Accessions	# Missed Cleavages	Ions Score	ptmRS: Best Site Probabilities
	mFIGsTAEDNTLQFWQLk	1	PBANKA_0203000		chromatin assembly factor 1 protein WD4 domain, putative	PBANKA_0203000.1-p1	0	48	S5(Phospho): 99.54
	mFIGsTAEDNTLQFWQLk	1	PBANKA_0203000		chromatin assembly factor 1 protein WD4 domain, putative	PBANKA_0203000.1-p1	0	46	S5(Phospho): 99.64
TELLDEENTVSTSNTDVE	1xTMT6plex [N-Term]; 1xPhospho [T9(100)]	23	PBANKA_0203000		chromatin assembly factor 1 protein WD4 domain, putative	0	-0.09	-0.13	-0.2	-0.16	-0.19	1	1	1	1	1		83
	Annotated Sequence	# Proteins	Master Protein Accessions			Protein Accessions	# Missed Cleavages	Ions Score	ptmRS: Best Site Probabilities
	tELLDEENtVSTSNTDVE	1	PBANKA_0203000		chromatin assembly factor 1 protein WD4 domain, putative	PBANKA_0203000.1-p1	0	83	T9(Phospho): 98.01
	tELLDEENtVSTSNTDVE	1	PBANKA_0203000		chromatin assembly factor 1 protein WD4 domain, putative	PBANKA_0203000.1-p1	0	79	T9(Phospho): 99.99
	tELLDEENtVSTSNTDVE	1	PBANKA_0203000		chromatin assembly factor 1 protein WD4 domain, putative	PBANKA_0203000.1-p1	0	63	T9(Phospho): 98.96
	tELLDEENtVSTSNTDVE	1	PBANKA_0203000		chromatin assembly factor 1 protein WD4 domain, putative	PBANKA_0203000.1-p1	0	61	T9(Phospho): 100
	tELLDEENtVSTSNTDVE	1	PBANKA_0203000		chromatin assembly factor 1 protein WD4 domain, putative	PBANKA_0203000.1-p1	0	60	T9(Phospho): 100
	tELLDEENtVSTSNTDVE	1	PBANKA_0203000		chromatin assembly factor 1 protein WD4 domain, putative	PBANKA_0203000.1-p1	0	59	T9(Phospho): 50; T15(Phospho): 50
	tELLDEENtVSTSNTDVE	1	PBANKA_0203000		chromatin assembly factor 1 protein WD4 domain, putative	PBANKA_0203000.1-p1	0	59	T9(Phospho): 97.59
	tELLDEENTVSTSNtDVE	1	PBANKA_0203000		chromatin assembly factor 1 protein WD4 domain, putative	PBANKA_0203000.1-p1	0	55	T9(Phospho): 99.98
	tELLDEENtVSTSNTDVE	1	PBANKA_0203000		chromatin assembly factor 1 protein WD4 domain, putative	PBANKA_0203000.1-p1	0	52	T9(Phospho): 100
	tELLDEENtVSTSNTDVE	1	PBANKA_0203000		chromatin assembly factor 1 protein WD4 domain, putative	PBANKA_0203000.1-p1	0	52	T9(Phospho): 49.28; T15(Phospho): 49.28
	tELLDEENtVSTSNTDVE	1	PBANKA_0203000		chromatin assembly factor 1 protein WD4 domain, putative	PBANKA_0203000.1-p1	0	50	T9(Phospho): 20; S11(Phospho): 20; T12(Phospho): 20; S13(Phospho): 20; T15(Phospho): 20
	tELLDEENtVSTSNTDVE	1	PBANKA_0203000		chromatin assembly factor 1 protein WD4 domain, putative	PBANKA_0203000.1-p1	0	50	T9(Phospho): 20; S11(Phospho): 20; T12(Phospho): 20; S13(Phospho): 20; T15(Phospho): 20
	tELLDEENTVSTSNtDVE	1	PBANKA_0203000		chromatin assembly factor 1 protein WD4 domain, putative	PBANKA_0203000.1-p1	0	50	T9(Phospho): 99.98
	tELLDEENtVSTSNTDVE	1	PBANKA_0203000		chromatin assembly factor 1 protein WD4 domain, putative	PBANKA_0203000.1-p1	0	45	T9(Phospho): 99.97
	tELLDEENtVSTSNTDVE	1	PBANKA_0203000		chromatin assembly factor 1 protein WD4 domain, putative	PBANKA_0203000.1-p1	0	45	S11(Phospho): 96.93
	tELLDEENtVSTSNTDVE	1	PBANKA_0203000		chromatin assembly factor 1 protein WD4 domain, putative	PBANKA_0203000.1-p1	0	44	T9(Phospho): 97.67
	tELLDEENtVSTSNTDVE	1	PBANKA_0203000		chromatin assembly factor 1 protein WD4 domain, putative	PBANKA_0203000.1-p1	0	37	T9(Phospho): 99.99
	tELLDEENtVSTSNTDVE	1	PBANKA_0203000		chromatin assembly factor 1 protein WD4 domain, putative	PBANKA_0203000.1-p1	0	37	T9(Phospho): 49.58; T15(Phospho): 49.58
	tELLDEENtVSTSNTDVE	1	PBANKA_0203000		chromatin assembly factor 1 protein WD4 domain, putative	PBANKA_0203000.1-p1	0	35	T9(Phospho): 24.94; T12(Phospho): 24.94; S13(Phospho): 24.94; T15(Phospho): 24.94
	tELLDEENTVSTSNtDVE	1	PBANKA_0203000		chromatin assembly factor 1 protein WD4 domain, putative	PBANKA_0203000.1-p1	0	35	T9(Phospho): 99.97
	tELLDEENtVSTSNTDVE	1	PBANKA_0203000		chromatin assembly factor 1 protein WD4 domain, putative	PBANKA_0203000.1-p1	0	32	T9(Phospho): 96.77
	tELLDEENTVSTSNtDVE	1	PBANKA_0203000		chromatin assembly factor 1 protein WD4 domain, putative	PBANKA_0203000.1-p1	0	30	T9(Phospho): 96.89
	tELLDEENTVSTSNtDVE	1	PBANKA_0203000		chromatin assembly factor 1 protein WD4 domain, putative	PBANKA_0203000.1-p1	0	27	T9(Phospho): 96.47
TELLDEENTVSTSNTDVE	2xPhospho [T9(100); S/T]; 1xTMT6plex [N-Term]	9	PBANKA_0203000		chromatin assembly factor 1 protein WD4 domain, putative	0	-0.07	0.21	0.07	0.04	-0.25							68
	Annotated Sequence	# Proteins	Master Protein Accessions			Protein Accessions	# Missed Cleavages	Ions Score	ptmRS: Best Site Probabilities
	tELLDEENtVSTSNtDVE	1	PBANKA_0203000		chromatin assembly factor 1 protein WD4 domain, putative	PBANKA_0203000.1-p1	0	68	T9(Phospho): 100; S11(Phospho): 25; T12(Phospho): 25; S13(Phospho): 25; T15(Phospho): 25
	tELLDEENtVSTSNtDVE	1	PBANKA_0203000		chromatin assembly factor 1 protein WD4 domain, putative	PBANKA_0203000.1-p1	0	64	T9(Phospho): 99.99; S11(Phospho): 25; T12(Phospho): 25; S13(Phospho): 25; T15(Phospho): 25
	tELLDEENtVSTSNtDVE	1	PBANKA_0203000		chromatin assembly factor 1 protein WD4 domain, putative	PBANKA_0203000.1-p1	0	57	T9(Phospho): 25.38; S11(Phospho): 25.38; T12(Phospho): 25.38; S13(Phospho): 25.38; T15(Phospho): 98.5
	tELLDEENtVSTSNtDVE	1	PBANKA_0203000		chromatin assembly factor 1 protein WD4 domain, putative	PBANKA_0203000.1-p1	0	54	T9(Phospho): 49.85; S11(Phospho): 49.85; T12(Phospho): 49.85; S13(Phospho): 49.85
	tELLDEENtVSTSNtDVE	1	PBANKA_0203000		chromatin assembly factor 1 protein WD4 domain, putative	PBANKA_0203000.1-p1	0	52	T9(Phospho): 100; S11(Phospho): 25; T12(Phospho): 25; S13(Phospho): 25; T15(Phospho): 25
	tELLDEENtVSTSNtDVE	1	PBANKA_0203000		chromatin assembly factor 1 protein WD4 domain, putative	PBANKA_0203000.1-p1	0	51	T9(Phospho): 100; S11(Phospho): 25; T12(Phospho): 25; S13(Phospho): 25; T15(Phospho): 25
	tELLDEENtVSTSNtDVE	1	PBANKA_0203000		chromatin assembly factor 1 protein WD4 domain, putative	PBANKA_0203000.1-p1	0	27	T9(Phospho): 99.99; S11(Phospho): 25; T12(Phospho): 25; S13(Phospho): 25; T15(Phospho): 25
	tELLDEENtVSTSNtDVE	1	PBANKA_0203000		chromatin assembly factor 1 protein WD4 domain, putative	PBANKA_0203000.1-p1	0	26	T9(Phospho): 99.99; S11(Phospho): 25; T12(Phospho): 25; S13(Phospho): 25; T15(Phospho): 25
	tELLDEENTVSTsNtDVE	1	PBANKA_0203000		chromatin assembly factor 1 protein WD4 domain, putative	PBANKA_0203000.1-p1	0	15	T9(Phospho): 40; S11(Phospho): 40; T12(Phospho): 40; S13(Phospho): 40; T15(Phospho): 40
HSIDDTTNSDSR	1xTMT6plex [N-Term]; 1xPhospho [S9(100)]	2	PBANKA_0203000		chromatin assembly factor 1 protein WD4 domain, putative	0	-0.18	-0.28	-0.07	0.18	-0.49							55
	Annotated Sequence	# Proteins	Master Protein Accessions			Protein Accessions	# Missed Cleavages	Ions Score	ptmRS: Best Site Probabilities
	hSIDDTTNsDSR	1	PBANKA_0203000		chromatin assembly factor 1 protein WD4 domain, putative	PBANKA_0203000.1-p1	0	55	S9(Phospho): 100
	hSIDDTTNsDSR	1	PBANKA_0203000		chromatin assembly factor 1 protein WD4 domain, putative	PBANKA_0203000.1-p1	0	23	T6(Phospho): 33.33; T7(Phospho): 33.33; S9(Phospho): 33.33
LNFSPNDSSILASASNNR	1xTMT6plex [N-Term]; 1xPhospho [S15(100)]	2	PBANKA_0203000		chromatin assembly factor 1 protein WD4 domain, putative	0											No Quan Values	64
	Annotated Sequence	# Proteins	Master Protein Accessions			Protein Accessions	# Missed Cleavages	Ions Score	ptmRS: Best Site Probabilities
	lNFSPNDSSILASAsNNR	1	PBANKA_0203000		chromatin assembly factor 1 protein WD4 domain, putative	PBANKA_0203000.1-p1	0	64	S15(Phospho): 100
	lNFSPNDSSILASAsNNR	1	PBANKA_0203000		chromatin assembly factor 1 protein WD4 domain, putative	PBANKA_0203000.1-p1	0	62	S15(Phospho): 100
MFIGSTAEDNTLQFWQLK	1xTMT6plex [K18]; 1xTMT6plex [N-Term]	1	PBANKA_0203000		chromatin assembly factor 1 protein WD4 domain, putative	0	0.1	-0.02	-0.07	-0.4	-0.09							50
	Annotated Sequence	# Proteins	Master Protein Accessions			Protein Accessions	# Missed Cleavages	Ions Score	ptmRS: Best Site Probabilities
	mFIGSTAEDNTLQFWQLk	1	PBANKA_0203000		chromatin assembly factor 1 protein WD4 domain, putative	PBANKA_0203000.1-p1	0	50
YNSISQNSQK	1xTMT6plex [K10]; 1xTMT6plex [N-Term]; 1xPhospho [S3(100)]	4	PBANKA_0203100	PIP5K	phosphatidylinositol-4-phosphate 5-kinase, putative	0	0.05	-0.25	-0.28	-0.19	-0.04	1	1	1	1	1		37
	Annotated Sequence	# Proteins	Master Protein Accessions			Protein Accessions	# Missed Cleavages	Ions Score	ptmRS: Best Site Probabilities
	yNsISQNSQk	1	PBANKA_0203100	PIP5K	phosphatidylinositol-4-phosphate 5-kinase, putative	PBANKA_0203100.1-p1	0	37	S3(Phospho): 100
	yNsISQNSQk	1	PBANKA_0203100	PIP5K	phosphatidylinositol-4-phosphate 5-kinase, putative	PBANKA_0203100.1-p1	0	30	S3(Phospho): 100
	yNsISQNSQk	1	PBANKA_0203100	PIP5K	phosphatidylinositol-4-phosphate 5-kinase, putative	PBANKA_0203100.1-p1	0	29	S3(Phospho): 100
	yNsISQNSQk	1	PBANKA_0203100	PIP5K	phosphatidylinositol-4-phosphate 5-kinase, putative	PBANKA_0203100.1-p1	0	29	S3(Phospho): 100
SNYYNSSK	1xTMT6plex [K8]; 1xTMT6plex [N-Term]; 1xPhospho [S7(99.7)]	2	PBANKA_0203100	PIP5K	phosphatidylinositol-4-phosphate 5-kinase, putative	0	0.1	0	-0.04	0.08	-0.1	1	1	1	1	1		21
	Annotated Sequence	# Proteins	Master Protein Accessions			Protein Accessions	# Missed Cleavages	Ions Score	ptmRS: Best Site Probabilities
	sNYYNSsk	1	PBANKA_0203100	PIP5K	phosphatidylinositol-4-phosphate 5-kinase, putative	PBANKA_0203100.1-p1	0	21	S7(Phospho): 99.72
	sNYYNSsk	1	PBANKA_0203100	PIP5K	phosphatidylinositol-4-phosphate 5-kinase, putative	PBANKA_0203100.1-p1	0	17	S7(Phospho): 99.68
TQFLDLKSQIFDFEK	2xTMT6plex [K7; K15]; 1xTMT6plex [N-Term]; 1xPhospho [S8(100)]	2	PBANKA_0203100	PIP5K	phosphatidylinositol-4-phosphate 5-kinase, putative	1	0.32	0.58	0.96	0.54	0.68	1	1	1	1	1		18
	Annotated Sequence	# Proteins	Master Protein Accessions			Protein Accessions	# Missed Cleavages	Ions Score	ptmRS: Best Site Probabilities
	tQFLDLksQIFDFEk	1	PBANKA_0203100	PIP5K	phosphatidylinositol-4-phosphate 5-kinase, putative	PBANKA_0203100.1-p1	1	18	S8(Phospho): 100
	tQFLDLksQIFDFEk	1	PBANKA_0203100	PIP5K	phosphatidylinositol-4-phosphate 5-kinase, putative	PBANKA_0203100.1-p1	1	14	S8(Phospho): 100
KSYSESTSTR	1xTMT6plex [K1]; 1xTMT6plex [N-Term]; 1xPhospho [S4(100)]	2	PBANKA_0203100	PIP5K	phosphatidylinositol-4-phosphate 5-kinase, putative	1	-0.32	-0.49	-0.58	-0.2	-0.53							20
	Annotated Sequence	# Proteins	Master Protein Accessions			Protein Accessions	# Missed Cleavages	Ions Score	ptmRS: Best Site Probabilities
	kSYsESTSTR	1	PBANKA_0203100	PIP5K	phosphatidylinositol-4-phosphate 5-kinase, putative	PBANKA_0203100.1-p1	1	20	S4(Phospho): 100
	kSYsESTSTR	1	PBANKA_0203100	PIP5K	phosphatidylinositol-4-phosphate 5-kinase, putative	PBANKA_0203100.1-p1	1	17	S4(Phospho): 100
GTTSLFIK	1xTMT6plex [K8]; 1xTMT6plex [N-Term]; 1xPhospho [T3(100)]	1	PBANKA_0203100	PIP5K	phosphatidylinositol-4-phosphate 5-kinase, putative	0	-0.1	-0.02	0.08	-0.09	-0.09							21
	Annotated Sequence	# Proteins	Master Protein Accessions			Protein Accessions	# Missed Cleavages	Ions Score	ptmRS: Best Site Probabilities
	gTtSLFIk	1	PBANKA_0203100	PIP5K	phosphatidylinositol-4-phosphate 5-kinase, putative	PBANKA_0203100.1-p1	0	21	T3(Phospho): 100
SYSESTSTR	1xTMT6plex [N-Term]; 1xPhospho [S3(100)]	2	PBANKA_0203100	PIP5K	phosphatidylinositol-4-phosphate 5-kinase, putative	0	-0.54	-0.65	-0.75	-0.42	-0.32	1	1	1	1	1		27
	Annotated Sequence	# Proteins	Master Protein Accessions			Protein Accessions	# Missed Cleavages	Ions Score	ptmRS: Best Site Probabilities
	sYsESTSTR	1	PBANKA_0203100	PIP5K	phosphatidylinositol-4-phosphate 5-kinase, putative	PBANKA_0203100.1-p1	0	27	S3(Phospho): 100
	sYsESTSTR	1	PBANKA_0203100	PIP5K	phosphatidylinositol-4-phosphate 5-kinase, putative	PBANKA_0203100.1-p1	0	23	S3(Phospho): 100
LANLYSFQGK	1xTMT6plex [K10]; 1xTMT6plex [N-Term]; 1xPhospho [S6(100)]	4	PBANKA_0203100	PIP5K	phosphatidylinositol-4-phosphate 5-kinase, putative	0	-0.08	-0.15	-0.33	-0.06	-0.19	1	1	1	1	1		52
	Annotated Sequence	# Proteins	Master Protein Accessions			Protein Accessions	# Missed Cleavages	Ions Score	ptmRS: Best Site Probabilities
	lANLYsFQGk	1	PBANKA_0203100	PIP5K	phosphatidylinositol-4-phosphate 5-kinase, putative	PBANKA_0203100.1-p1	0	52	S6(Phospho): 100
	lANLYsFQGk	1	PBANKA_0203100	PIP5K	phosphatidylinositol-4-phosphate 5-kinase, putative	PBANKA_0203100.1-p1	0	28	S6(Phospho): 100
	lANLYsFQGk	1	PBANKA_0203100	PIP5K	phosphatidylinositol-4-phosphate 5-kinase, putative	PBANKA_0203100.1-p1	0	26	S6(Phospho): 100
	lANLYsFQGk	1	PBANKA_0203100	PIP5K	phosphatidylinositol-4-phosphate 5-kinase, putative	PBANKA_0203100.1-p1	0	26	S6(Phospho): 100
KLANLYSFQGK	2xTMT6plex [K1; K11]; 1xTMT6plex [N-Term]; 1xPhospho [S7(100)]	2	PBANKA_0203100	PIP5K	phosphatidylinositol-4-phosphate 5-kinase, putative	1	0.03	-0.06	-0.09	0.12	-0.29							63
	Annotated Sequence	# Proteins	Master Protein Accessions			Protein Accessions	# Missed Cleavages	Ions Score	ptmRS: Best Site Probabilities
	kLANLYsFQGk	1	PBANKA_0203100	PIP5K	phosphatidylinositol-4-phosphate 5-kinase, putative	PBANKA_0203100.1-p1	1	63	S7(Phospho): 100
	kLANLYsFQGk	1	PBANKA_0203100	PIP5K	phosphatidylinositol-4-phosphate 5-kinase, putative	PBANKA_0203100.1-p1	1	58	S7(Phospho): 100
GENKSPNQIASTNDILQETTR	1xTMT6plex [K4]; 1xTMT6plex [N-Term]; 1xPhospho [S5(100)]	3	PBANKA_0204200		tubulin-specific chaperone a, putative	1	-0.35	-0.39	-0.43	-0.31	-0.25	1	1	1	1	1		49
	Annotated Sequence	# Proteins	Master Protein Accessions			Protein Accessions	# Missed Cleavages	Ions Score	ptmRS: Best Site Probabilities
	gENksPNQIASTNDILQETTR	1	PBANKA_0204200		tubulin-specific chaperone a, putative	PBANKA_0204200.1-p1	1	49	S5(Phospho): 100
	gENksPNQIASTNDILQETTR	1	PBANKA_0204200		tubulin-specific chaperone a, putative	PBANKA_0204200.1-p1	1	33	S5(Phospho): 100
	gENksPNQIASTNDILQETTR	1	PBANKA_0204200		tubulin-specific chaperone a, putative	PBANKA_0204200.1-p1	1	22	S5(Phospho): 100
DMTLPICNSNITNNTVTPQEDYVEI	1xCarbamidomethyl [C7]; 1xTMT6plex [N-Term]; 1xPhospho [T17(97.2)]	1	PBANKA_0204200		tubulin-specific chaperone a, putative	0	0.18	0.02	0.03	-0.36	-0.01							43
	Annotated Sequence	# Proteins	Master Protein Accessions			Protein Accessions	# Missed Cleavages	Ions Score	ptmRS: Best Site Probabilities
	dMTLPIcNSNITNNTVTPQEDyVEI	1	PBANKA_0204200		tubulin-specific chaperone a, putative	PBANKA_0204200.1-p1	0	43	T17(Phospho): 97.16
KNEINSVK	2xTMT6plex [K1; K8]; 1xTMT6plex [N-Term]; 1xPhospho [S6(100)]	1	PBANKA_0204500	CCp5	LCCL domain-containing protein, putative	1	0.65	0.25	1.07	0.68	0.57							14
	Annotated Sequence	# Proteins	Master Protein Accessions			Protein Accessions	# Missed Cleavages	Ions Score	ptmRS: Best Site Probabilities
	kNEINsVk	1	PBANKA_0204500	CCp5	LCCL domain-containing protein, putative	PBANKA_0204500.1-p1	1	14	S6(Phospho): 100
INSMVHK	1xTMT6plex [K7]; 1xTMT6plex [N-Term]; 1xPhospho [S3(100)]	4	PBANKA_0204500	CCp5	LCCL domain-containing protein, putative	0	-0.21	-0.37	-0.04	-0.28	-0.49	1	1	1	1	1		38
	Annotated Sequence	# Proteins	Master Protein Accessions			Protein Accessions	# Missed Cleavages	Ions Score	ptmRS: Best Site Probabilities
	iNsMVHk	1	PBANKA_0204500	CCp5	LCCL domain-containing protein, putative	PBANKA_0204500.1-p1	0	38	S3(Phospho): 100
	iNsMVHk	1	PBANKA_0204500	CCp5	LCCL domain-containing protein, putative	PBANKA_0204500.1-p1	0	29	S3(Phospho): 100
	iNsMVHk	1	PBANKA_0204500	CCp5	LCCL domain-containing protein, putative	PBANKA_0204500.1-p1	0	16	S3(Phospho): 100
	iNsMVHk	1	PBANKA_0204500	CCp5	LCCL domain-containing protein, putative	PBANKA_0204500.1-p1	0	15	S3(Phospho): 100
INSMVHK	1xOxidation [M4]; 1xTMT6plex [K7]; 1xTMT6plex [N-Term]; 1xPhospho [S3(100)]	2	PBANKA_0204500	CCp5	LCCL domain-containing protein, putative	0	-0.27	-0.14	0.05	-0.02	-0.3	1	1	1	1	1		24
	Annotated Sequence	# Proteins	Master Protein Accessions			Protein Accessions	# Missed Cleavages	Ions Score	ptmRS: Best Site Probabilities
	iNsmVHk	1	PBANKA_0204500	CCp5	LCCL domain-containing protein, putative	PBANKA_0204500.1-p1	0	24	S3(Phospho): 100
	iNsmVHk	1	PBANKA_0204500	CCp5	LCCL domain-containing protein, putative	PBANKA_0204500.1-p1	0	24	S3(Phospho): 100
INSMVHKYDLLCGNK	1xCarbamidomethyl [C12]; 2xTMT6plex [K7; K15]; 1xTMT6plex [N-Term]; 1xPhospho [S3(100)]	2	PBANKA_0204500	CCp5	LCCL domain-containing protein, putative	1	-0.25	-0.05	-0.13	-0.2	0.1	1	1	1	1	1		28
	Annotated Sequence	# Proteins	Master Protein Accessions			Protein Accessions	# Missed Cleavages	Ions Score	ptmRS: Best Site Probabilities
	iNsMVHkYDLLcGNk	1	PBANKA_0204500	CCp5	LCCL domain-containing protein, putative	PBANKA_0204500.1-p1	1	28	S3(Phospho): 100
	iNsMVHkYDLLcGNk	1	PBANKA_0204500	CCp5	LCCL domain-containing protein, putative	PBANKA_0204500.1-p1	1	22	S3(Phospho): 100
VSGNISPYSTGNSEIYDAISNSK	1xTMT6plex [K23]; 1xTMT6plex [N-Term]; 1xPhospho [S13(100)]	1	PBANKA_0204800	PSOP24	secreted ookinete protein, putative	0	-0.21	-0.19	-0.1	-0.1	0.04							55
	Annotated Sequence	# Proteins	Master Protein Accessions			Protein Accessions	# Missed Cleavages	Ions Score	ptmRS: Best Site Probabilities
	vSGNISPYSTGNsEIYDAISNSk	1	PBANKA_0204800	PSOP24	secreted ookinete protein, putative	PBANKA_0204800.1-p1	0	55	S13(Phospho): 99.99
VSGNISPYSTGNSEIYDAISNSK	1xTMT6plex [K23]; 1xTMT6plex [N-Term]; 2xPhospho [S6(100); S9(98.8)]	1	PBANKA_0204800	PSOP24	secreted ookinete protein, putative	0	-0.26	0.1	-0.1	-0.25	-0.07							22
	Annotated Sequence	# Proteins	Master Protein Accessions			Protein Accessions	# Missed Cleavages	Ions Score	ptmRS: Best Site Probabilities
	vSGNIsPYsTGNSEIYDAISNSk	1	PBANKA_0204800	PSOP24	secreted ookinete protein, putative	PBANKA_0204800.1-p1	0	22	S6(Phospho): 100; S9(Phospho): 98.82
KPSIPLNENISIR	1xTMT6plex [K1]; 1xTMT6plex [N-Term]; 1xPhospho [S3(100)]	2	PBANKA_0204800	PSOP24	secreted ookinete protein, putative	0	0.04	-0.07	0.21	0.09	-0.04	1	1	1	1	1		39
	Annotated Sequence	# Proteins	Master Protein Accessions			Protein Accessions	# Missed Cleavages	Ions Score	ptmRS: Best Site Probabilities
	kPsIPLNENISIR	1	PBANKA_0204800	PSOP24	secreted ookinete protein, putative	PBANKA_0204800.1-p1	0	39	S3(Phospho): 100
	kPsIPLNENISIR	1	PBANKA_0204800	PSOP24	secreted ookinete protein, putative	PBANKA_0204800.1-p1	0	23	S3(Phospho): 100
NNEEDRQTNSPFINPYLK	1xTMT6plex [K18]; 1xTMT6plex [N-Term]; 1xPhospho [S10(100)]	1	PBANKA_0204800	PSOP24	secreted ookinete protein, putative	1											No Quan Values	18
	Annotated Sequence	# Proteins	Master Protein Accessions			Protein Accessions	# Missed Cleavages	Ions Score	ptmRS: Best Site Probabilities
	nNEEDRQTNsPFINPYLk	1	PBANKA_0204800	PSOP24	secreted ookinete protein, putative	PBANKA_0204800.1-p1	1	18	S10(Phospho): 100
NNNTNEYEEHKIHSFHLK	2xTMT6plex [K11; K18]; 1xTMT6plex [N-Term]; 1xPhospho [S14(100)]	2	PBANKA_0204800	PSOP24	secreted ookinete protein, putative	1	-0.26	-0.23	-0.11	-0.14	0.05	1	1	1	1	1		31
	Annotated Sequence	# Proteins	Master Protein Accessions			Protein Accessions	# Missed Cleavages	Ions Score	ptmRS: Best Site Probabilities
	nNNTNEYEEHkIHsFHLk	1	PBANKA_0204800	PSOP24	secreted ookinete protein, putative	PBANKA_0204800.1-p1	1	31	S14(Phospho): 100
	nNNTNEYEEHkIHsFHLk	1	PBANKA_0204800	PSOP24	secreted ookinete protein, putative	PBANKA_0204800.1-p1	1	29	S14(Phospho): 100
IHSFHLK	1xTMT6plex [K7]; 1xTMT6plex [N-Term]; 1xPhospho [S3(100)]	1	PBANKA_0204800	PSOP24	secreted ookinete protein, putative	0	-0.1	0.01	0.42	0.28	-0.27							20
	Annotated Sequence	# Proteins	Master Protein Accessions			Protein Accessions	# Missed Cleavages	Ions Score	ptmRS: Best Site Probabilities
	iHsFHLk	1	PBANKA_0204800	PSOP24	secreted ookinete protein, putative	PBANKA_0204800.1-p1	0	20	S3(Phospho): 100
IPDLIVSEENVQENKNNIIDTTSEVVDVPK	2xTMT6plex [K15; K30]; 1xTMT6plex [N-Term]; 1xPhospho [S7(100)]	1	PBANKA_0205000		conserved Plasmodium protein, unknown function	1	-0.04	-0.32	-0.25	0.14	-0.22							32
	Annotated Sequence	# Proteins	Master Protein Accessions			Protein Accessions	# Missed Cleavages	Ions Score	ptmRS: Best Site Probabilities
	iPDLIVsEENVQENkNNIIDTTSEVVDVPk	1	PBANKA_0205000		conserved Plasmodium protein, unknown function	PBANKA_0205000.1-p1	1	32	S7(Phospho): 100
IPDLIVSEENVQENK	1xTMT6plex [K15]; 1xTMT6plex [N-Term]; 1xPhospho [S7(100)]	2	PBANKA_0205000		conserved Plasmodium protein, unknown function	0	-0.03	-0.07	-0.3	-0.24	-0.22	1	1	1	1	1		75
	Annotated Sequence	# Proteins	Master Protein Accessions			Protein Accessions	# Missed Cleavages	Ions Score	ptmRS: Best Site Probabilities
	iPDLIVsEENVQENk	1	PBANKA_0205000		conserved Plasmodium protein, unknown function	PBANKA_0205000.1-p1	0	75	S7(Phospho): 100
	iPDLIVsEENVQENk	1	PBANKA_0205000		conserved Plasmodium protein, unknown function	PBANKA_0205000.1-p1	0	70	S7(Phospho): 100
NVENDKSDENMNNK	2xTMT6plex [K6; K14]; 1xTMT6plex [N-Term]; 1xPhospho [S7(100)]	4	PBANKA_0205200		conserved Plasmodium protein, unknown function	1	-0.02	-0.23	-0.39	-0.16	-0.04	1	1	1	1	1		23
	Annotated Sequence	# Proteins	Master Protein Accessions			Protein Accessions	# Missed Cleavages	Ions Score	ptmRS: Best Site Probabilities
	nVENDksDENMNNk	1	PBANKA_0205200		conserved Plasmodium protein, unknown function	PBANKA_0205200.1-p1	1	23	S7(Phospho): 100
	nVENDksDENMNNk	1	PBANKA_0205200		conserved Plasmodium protein, unknown function	PBANKA_0205200.1-p1	1	19	S7(Phospho): 100
	nVENDksDENMNNk	1	PBANKA_0205200		conserved Plasmodium protein, unknown function	PBANKA_0205200.1-p1	1	18	S7(Phospho): 100
	nVENDksDENMNNk	1	PBANKA_0205200		conserved Plasmodium protein, unknown function	PBANKA_0205200.1-p1	1	15	S7(Phospho): 100
EYPVSESIDNDKIDDLHSER	1xTMT6plex [K12]; 1xTMT6plex [N-Term]; 1xPhospho [S5(100)]	3	PBANKA_0205200		conserved Plasmodium protein, unknown function	1	0.01	-0.05	-0.24	-0.07	0.18	1	1	1	1	1		31
	Annotated Sequence	# Proteins	Master Protein Accessions			Protein Accessions	# Missed Cleavages	Ions Score	ptmRS: Best Site Probabilities
	eYPVSEsIDNDkIDDLHSER	1	PBANKA_0205200		conserved Plasmodium protein, unknown function	PBANKA_0205200.1-p1	1	31	S7(Phospho): 100
	eYPVsESIDNDkIDDLHSER	1	PBANKA_0205200		conserved Plasmodium protein, unknown function	PBANKA_0205200.1-p1	1	28	S5(Phospho): 100
	eYPVSEsIDNDkIDDLHSER	1	PBANKA_0205200		conserved Plasmodium protein, unknown function	PBANKA_0205200.1-p1	1	26	S7(Phospho): 100
SNTEISDDNKSDINDISDVTSKPVEK	3xTMT6plex [K10; K22; K26]; 1xTMT6plex [N-Term]; 1xPhospho [S6(99.4)]	4	PBANKA_0205200		conserved Plasmodium protein, unknown function	1	0.41	-0.05	-0.14	-0.01	0.19	0.630349	1	1	1	1		33
	Annotated Sequence	# Proteins	Master Protein Accessions			Protein Accessions	# Missed Cleavages	Ions Score	ptmRS: Best Site Probabilities
	sNTEIsDDNkSDINDISDVTSkPVEk	1	PBANKA_0205200		conserved Plasmodium protein, unknown function	PBANKA_0205200.1-p1	1	33	S6(Phospho): 99.36
	sNTEIsDDNkSDINDISDVTSkPVEk	1	PBANKA_0205200		conserved Plasmodium protein, unknown function	PBANKA_0205200.1-p1	1	28	S6(Phospho): 99.27
	sNTEIsDDNkSDINDISDVTSkPVEk	1	PBANKA_0205200		conserved Plasmodium protein, unknown function	PBANKA_0205200.1-p1	1	16	S6(Phospho): 99.25
	sNTEIsDDNkSDINDISDVTSkPVEk	1	PBANKA_0205200		conserved Plasmodium protein, unknown function	PBANKA_0205200.1-p1	1	14	S6(Phospho): 100
SNTEISDDNKSDINDISDVTSKPVEK	3xTMT6plex [K10; K22; K26]; 1xTMT6plex [N-Term]; 2xPhospho [S6(100); S11(100)]	2	PBANKA_0205200		conserved Plasmodium protein, unknown function	1	-0.29	-0.34	-0.37	-0.25	-0.31							14
	Annotated Sequence	# Proteins	Master Protein Accessions			Protein Accessions	# Missed Cleavages	Ions Score	ptmRS: Best Site Probabilities
	sNTEIsDDNksDINDISDVTSkPVEk	1	PBANKA_0205200		conserved Plasmodium protein, unknown function	PBANKA_0205200.1-p1	1	14	S6(Phospho): 100; S11(Phospho): 100
	sNTEIsDDNksDINDISDVTSkPVEk	1	PBANKA_0205200		conserved Plasmodium protein, unknown function	PBANKA_0205200.1-p1	1	14	S6(Phospho): 99.98; S11(Phospho): 100
FPSNELGNVILNMR	1xTMT6plex [N-Term]; 1xPhospho [S3(100)]	2	PBANKA_0205800	eIK2	eukaryotic translation initiation factor 2-alpha kinase 2	0	-0.24	-0.34	-0.34	-0.33	-0.71							41
	Annotated Sequence	# Proteins	Master Protein Accessions			Protein Accessions	# Missed Cleavages	Ions Score	ptmRS: Best Site Probabilities
	fPsNELGNVILNMR	1	PBANKA_0205800	eIK2	eukaryotic translation initiation factor 2-alpha kinase 2	PBANKA_0205800.1-p1	0	41	S3(Phospho): 100
	fPsNELGNVILNMR	1	PBANKA_0205800	eIK2	eukaryotic translation initiation factor 2-alpha kinase 2	PBANKA_0205800.1-p1	0	41	S3(Phospho): 100
SGSNTIHIR	1xTMT6plex [N-Term]; 1xPhospho [S3(100)]	4	PBANKA_0205800	eIK2	eukaryotic translation initiation factor 2-alpha kinase 2	0	-0.43	-0.64	-0.83	-0.46	-0.63	0.819641	0.0398464	0.0107248	0.327792	0.0837117		44
	Annotated Sequence	# Proteins	Master Protein Accessions			Protein Accessions	# Missed Cleavages	Ions Score	ptmRS: Best Site Probabilities
	sGsNTIHIR	1	PBANKA_0205800	eIK2	eukaryotic translation initiation factor 2-alpha kinase 2	PBANKA_0205800.1-p1	0	44	S3(Phospho): 100
	sGsNTIHIR	1	PBANKA_0205800	eIK2	eukaryotic translation initiation factor 2-alpha kinase 2	PBANKA_0205800.1-p1	0	37	S3(Phospho): 100
	sGsNTIHIR	1	PBANKA_0205800	eIK2	eukaryotic translation initiation factor 2-alpha kinase 2	PBANKA_0205800.1-p1	0	27	S3(Phospho): 100
	sGsNTIHIR	1	PBANKA_0205800	eIK2	eukaryotic translation initiation factor 2-alpha kinase 2	PBANKA_0205800.1-p1	0	20	S3(Phospho): 100
CHNLSFSQNR	1xCarbamidomethyl [C1]; 1xTMT6plex [N-Term]; 1xPhospho [S5(100)]	2	PBANKA_0205800	eIK2	eukaryotic translation initiation factor 2-alpha kinase 2	0	-0.22	-0.13	-0.25	-0.3	-0.35							29
	Annotated Sequence	# Proteins	Master Protein Accessions			Protein Accessions	# Missed Cleavages	Ions Score	ptmRS: Best Site Probabilities
	cHNLsFSQNR	1	PBANKA_0205800	eIK2	eukaryotic translation initiation factor 2-alpha kinase 2	PBANKA_0205800.1-p1	0	29	S5(Phospho): 100
	cHNLsFSQNR	1	PBANKA_0205800	eIK2	eukaryotic translation initiation factor 2-alpha kinase 2	PBANKA_0205800.1-p1	0	22	S5(Phospho): 100
FLTIPNK	1xTMT6plex [K7]; 1xTMT6plex [N-Term]; 1xPhospho [T3(100)]	4	PBANKA_0205800	eIK2	eukaryotic translation initiation factor 2-alpha kinase 2	0	0.28	0.07	0	0.08	-0.04	1	1	1	1	1		27
	Annotated Sequence	# Proteins	Master Protein Accessions			Protein Accessions	# Missed Cleavages	Ions Score	ptmRS: Best Site Probabilities
	fLtIPNk	1	PBANKA_0205800	eIK2	eukaryotic translation initiation factor 2-alpha kinase 2	PBANKA_0205800.1-p1	0	27	T3(Phospho): 100
	fLtIPNk	1	PBANKA_0205800	eIK2	eukaryotic translation initiation factor 2-alpha kinase 2	PBANKA_0205800.1-p1	0	17	T3(Phospho): 100
	fLtIPNk	1	PBANKA_0205800	eIK2	eukaryotic translation initiation factor 2-alpha kinase 2	PBANKA_0205800.1-p1	0	14	T3(Phospho): 100
	fLtIPNk	1	PBANKA_0205800	eIK2	eukaryotic translation initiation factor 2-alpha kinase 2	PBANKA_0205800.1-p1	0	13	T3(Phospho): 100
TVASDFSSNLK	1xTMT6plex [K11]; 1xTMT6plex [N-Term]; 1xPhospho [S4(100)]	4	PBANKA_0205800	eIK2	eukaryotic translation initiation factor 2-alpha kinase 2	0	-0.13	-0.44	-0.3	-0.15	-0.2	1	1	1	1	1		46
	Annotated Sequence	# Proteins	Master Protein Accessions			Protein Accessions	# Missed Cleavages	Ions Score	ptmRS: Best Site Probabilities
	tVAsDFSSNLk	1	PBANKA_0205800	eIK2	eukaryotic translation initiation factor 2-alpha kinase 2	PBANKA_0205800.1-p1	0	46	S4(Phospho): 100
	tVAsDFSSNLk	1	PBANKA_0205800	eIK2	eukaryotic translation initiation factor 2-alpha kinase 2	PBANKA_0205800.1-p1	0	44	S4(Phospho): 100
	tVAsDFSSNLk	1	PBANKA_0205800	eIK2	eukaryotic translation initiation factor 2-alpha kinase 2	PBANKA_0205800.1-p1	0	37	S4(Phospho): 100
	tVAsDFSSNLk	1	PBANKA_0205800	eIK2	eukaryotic translation initiation factor 2-alpha kinase 2	PBANKA_0205800.1-p1	0	24	S4(Phospho): 100
TEHDNSNIYSHYNINDDINRR	1xTMT6plex [N-Term]; 1xPhospho [S6(100)]	1	PBANKA_0205900	NCR1	Niemann-Pick type C1-related protein, putative	1	-0.12	0.18	0.26	0.43	0.3							20
	Annotated Sequence	# Proteins	Master Protein Accessions			Protein Accessions	# Missed Cleavages	Ions Score	ptmRS: Best Site Probabilities
	tEHDNsNIYSHYNINDDINRR	1	PBANKA_0205900	NCR1	Niemann-Pick type C1-related protein, putative	PBANKA_0205900.1-p1	1	20	S6(Phospho): 100
INNNYTSQISLEK	1xTMT6plex [K13]; 1xTMT6plex [N-Term]; 1xPhospho [S10(100)]	2	PBANKA_0205900	NCR1	Niemann-Pick type C1-related protein, putative	0	-0.14	-0.13	-0.15	-0.09	-0.44	1	1	1	1	1		63
	Annotated Sequence	# Proteins	Master Protein Accessions			Protein Accessions	# Missed Cleavages	Ions Score	ptmRS: Best Site Probabilities
	iNNNYTSQIsLEk	1	PBANKA_0205900	NCR1	Niemann-Pick type C1-related protein, putative	PBANKA_0205900.1-p1	0	63	S10(Phospho): 100
	iNNNYTSQIsLEk	1	PBANKA_0205900	NCR1	Niemann-Pick type C1-related protein, putative	PBANKA_0205900.1-p1	0	27	S10(Phospho): 100
IYMLSSHDNVLFYK	1xTMT6plex [K14]; 1xTMT6plex [N-Term]; 1xPhospho [S6(99.7)]	2	PBANKA_0205900	NCR1	Niemann-Pick type C1-related protein, putative	0	-0.09	0.11	0.02	0.06	0.09	1	1	1	1	1		42
	Annotated Sequence	# Proteins	Master Protein Accessions			Protein Accessions	# Missed Cleavages	Ions Score	ptmRS: Best Site Probabilities
	iYMLSsHDNVLFYk	1	PBANKA_0205900	NCR1	Niemann-Pick type C1-related protein, putative	PBANKA_0205900.1-p1	0	42	S6(Phospho): 99.54
	iYMLSsHDNVLFYk	1	PBANKA_0205900	NCR1	Niemann-Pick type C1-related protein, putative	PBANKA_0205900.1-p1	0	40	S6(Phospho): 99.67
NIQDSTSKVYPSNVNQNIQK	2xTMT6plex [K8; K20]; 1xTMT6plex [N-Term]; 1xPhospho [S7(99.4)]	2	PBANKA_0205900	NCR1	Niemann-Pick type C1-related protein, putative	1	-0.41	-0.07	-0.02	-0.19	0.08	1	1	1	1	1		53
	Annotated Sequence	# Proteins	Master Protein Accessions			Protein Accessions	# Missed Cleavages	Ions Score	ptmRS: Best Site Probabilities
	nIQDSTskVYPSNVNQNIQk	1	PBANKA_0205900	NCR1	Niemann-Pick type C1-related protein, putative	PBANKA_0205900.1-p1	1	53	S7(Phospho): 99.39
	nIQDSTSkVyPSNVNQNIQk	1	PBANKA_0205900	NCR1	Niemann-Pick type C1-related protein, putative	PBANKA_0205900.1-p1	1	15	S5(Phospho): 20; T6(Phospho): 20; S7(Phospho): 20; Y10(Phospho): 20; S12(Phospho): 20
GSKIIDDK	2xTMT6plex [K3; K8]; 1xTMT6plex [N-Term]; 1xPhospho [S2(100)]	2	PBANKA_0207000	SERCA	calcium-transporting ATPase, putative	1	0.12	-0.36	-0.35	-0.27	-0.18	1	1	1	1	1		18
	Annotated Sequence	# Proteins	Master Protein Accessions			Protein Accessions	# Missed Cleavages	Ions Score	ptmRS: Best Site Probabilities
	gskIIDDk	1	PBANKA_0207000	SERCA	calcium-transporting ATPase, putative	PBANKA_0207000.1-p1	1	18	S2(Phospho): 100
	gskIIDDk	1	PBANKA_0207000	SERCA	calcium-transporting ATPase, putative	PBANKA_0207000.1-p1	1	16	S2(Phospho): 100
KNSDINIDYDSSIYR	1xTMT6plex [K1]; 1xTMT6plex [N-Term]; 1xPhospho [S3(100)]	5	PBANKA_0207000	SERCA	calcium-transporting ATPase, putative	1	0.04	-0.45	-0.45	-0.19	-0.29	1	0.990775	0.70102	1	1		39
	Annotated Sequence	# Proteins	Master Protein Accessions			Protein Accessions	# Missed Cleavages	Ions Score	ptmRS: Best Site Probabilities
	kNsDINIDYDSSIYR	1	PBANKA_0207000	SERCA	calcium-transporting ATPase, putative	PBANKA_0207000.1-p1	1	39	S3(Phospho): 100
	kNsDINIDYDSSIYR	1	PBANKA_0207000	SERCA	calcium-transporting ATPase, putative	PBANKA_0207000.1-p1	1	28	S3(Phospho): 100
	kNsDINIDYDSSIYR	1	PBANKA_0207000	SERCA	calcium-transporting ATPase, putative	PBANKA_0207000.1-p1	1	27	S3(Phospho): 100
	kNsDINIDYDSSIYR	1	PBANKA_0207000	SERCA	calcium-transporting ATPase, putative	PBANKA_0207000.1-p1	1	18	S3(Phospho): 100
	kNsDINIDYDSSIYR	1	PBANKA_0207000	SERCA	calcium-transporting ATPase, putative	PBANKA_0207000.1-p1	1	16	S3(Phospho): 100
MAAEYEKINSISK	2xTMT6plex [K7; K13]; 1xTMT6plex [N-Term]; 1xPhospho [S10(100)]	1	PBANKA_0207000	SERCA	calcium-transporting ATPase, putative	1	0.08	0.49	0.34	0.3	0.45							21
	Annotated Sequence	# Proteins	Master Protein Accessions			Protein Accessions	# Missed Cleavages	Ions Score	ptmRS: Best Site Probabilities
	mAAEYEkINsISk	1	PBANKA_0207000	SERCA	calcium-transporting ATPase, putative	PBANKA_0207000.1-p1	1	21	S10(Phospho): 100
SNVNTIISRGSK	1xTMT6plex [K12]; 1xTMT6plex [N-Term]; 1xPhospho [S11(100)]	3	PBANKA_0207000	SERCA	calcium-transporting ATPase, putative	1	0.22	-0.66	-1.11	-0.53	-0.19	1	1	1	1	1		50
	Annotated Sequence	# Proteins	Master Protein Accessions			Protein Accessions	# Missed Cleavages	Ions Score	ptmRS: Best Site Probabilities
	sNVNTIISRGsk	1	PBANKA_0207000	SERCA	calcium-transporting ATPase, putative	PBANKA_0207000.1-p1	1	50	S11(Phospho): 100
	sNVNTIISRGsk	1	PBANKA_0207000	SERCA	calcium-transporting ATPase, putative	PBANKA_0207000.1-p1	1	45	S11(Phospho): 100
	sNVNTIISRGsk	1	PBANKA_0207000	SERCA	calcium-transporting ATPase, putative	PBANKA_0207000.1-p1	1	16	S11(Phospho): 100
NSDINIDYDSSIYR	1xTMT6plex [N-Term]; 1xPhospho [S2(100)]	2	PBANKA_0207000	SERCA	calcium-transporting ATPase, putative	0	-0.1	0.01	-0.07	-0.18	0.03	1	1	1	1	1		52
	Annotated Sequence	# Proteins	Master Protein Accessions			Protein Accessions	# Missed Cleavages	Ions Score	ptmRS: Best Site Probabilities
	nsDINIDYDSSIYR	1	PBANKA_0207000	SERCA	calcium-transporting ATPase, putative	PBANKA_0207000.1-p1	0	52	S2(Phospho): 100
	nsDINIDYDSSIYR	1	PBANKA_0207000	SERCA	calcium-transporting ATPase, putative	PBANKA_0207000.1-p1	0	40	S2(Phospho): 100
SNVNTIISR	1xTMT6plex [N-Term]; 1xPhospho [S1(100)]	2	PBANKA_0207000	SERCA	calcium-transporting ATPase, putative	0	0	-0.17	0.09	0.02	-0.51	1	1	1	1	1		27
	Annotated Sequence	# Proteins	Master Protein Accessions			Protein Accessions	# Missed Cleavages	Ions Score	ptmRS: Best Site Probabilities
	sNVNTIISR	1	PBANKA_0207000	SERCA	calcium-transporting ATPase, putative	PBANKA_0207000.1-p1	0	27	S1(Phospho): 100
	sNVNTIISR	1	PBANKA_0207000	SERCA	calcium-transporting ATPase, putative	PBANKA_0207000.1-p1	0	14	S1(Phospho): 100
NIIDNDEDDTDYEKEPLINMK	2xTMT6plex [K14; K21]; 1xTMT6plex [N-Term]; 1xPhospho [T10(100)]	4	PBANKA_0207000	SERCA	calcium-transporting ATPase, putative	1	-0.09	-0.73	-0.95	-0.66	-0.71	1	1	1	1	1		69
	Annotated Sequence	# Proteins	Master Protein Accessions			Protein Accessions	# Missed Cleavages	Ions Score	ptmRS: Best Site Probabilities
	nIIDNDEDDtDYEkEPLINMk	1	PBANKA_0207000	SERCA	calcium-transporting ATPase, putative	PBANKA_0207000.1-p1	1	69	T10(Phospho): 100
	nIIDNDEDDtDYEkEPLINMk	1	PBANKA_0207000	SERCA	calcium-transporting ATPase, putative	PBANKA_0207000.1-p1	1	60	T10(Phospho): 100
	nIIDNDEDDtDYEkEPLINMk	1	PBANKA_0207000	SERCA	calcium-transporting ATPase, putative	PBANKA_0207000.1-p1	1	35	T10(Phospho): 100
	nIIDNDEDDTDyEkEPLINMk	1	PBANKA_0207000	SERCA	calcium-transporting ATPase, putative	PBANKA_0207000.1-p1	1	19	T10(Phospho): 50; Y12(Phospho): 50
INSISKK	2xTMT6plex [K6; K7]; 1xTMT6plex [N-Term]; 1xPhospho [S3(100)]	2	PBANKA_0207000	SERCA	calcium-transporting ATPase, putative	1	-0.35	-0.92	-1.11	-0.8	-0.63	1	0.377579	0.116376	0.839204	1		20
	Annotated Sequence	# Proteins	Master Protein Accessions			Protein Accessions	# Missed Cleavages	Ions Score	ptmRS: Best Site Probabilities
	iNsISkk	1	PBANKA_0207000	SERCA	calcium-transporting ATPase, putative	PBANKA_0207000.1-p1	1	20	S3(Phospho): 100
	iNsISkk	1	PBANKA_0207000	SERCA	calcium-transporting ATPase, putative	PBANKA_0207000.1-p1	1	17	S3(Phospho): 100
YNYSDSIYVNKR	1xTMT6plex [K11]; 1xTMT6plex [N-Term]; 1xPhospho [S4(100)]	2	PBANKA_0207500		cyclin-dependent kinases regulatory subunit, putative	1	-0.13	-0.28	-0.29	-0.36	-0.28	1	1	1	1	1		20
	Annotated Sequence	# Proteins	Master Protein Accessions			Protein Accessions	# Missed Cleavages	Ions Score	ptmRS: Best Site Probabilities
	yNYsDSIYVNkR	1	PBANKA_0207500		cyclin-dependent kinases regulatory subunit, putative	PBANKA_0207500.1-p1	1	20	S4(Phospho): 100
	yNYsDSIYVNkR	1	PBANKA_0207500		cyclin-dependent kinases regulatory subunit, putative	PBANKA_0207500.1-p1	1	19	S4(Phospho): 100
YNASNNSHNFK	1xTMT6plex [K11]; 1xTMT6plex [N-Term]; 1xPhospho [S7(100)]	2	PBANKA_0207500		cyclin-dependent kinases regulatory subunit, putative	0	-0.08	0.13	0.13	0.18	0.11	1	1	1	1	1		22
	Annotated Sequence	# Proteins	Master Protein Accessions			Protein Accessions	# Missed Cleavages	Ions Score	ptmRS: Best Site Probabilities
	yNASNNsHNFk	1	PBANKA_0207500		cyclin-dependent kinases regulatory subunit, putative	PBANKA_0207500.1-p1	0	22	S7(Phospho): 100
	yNASNNsHNFk	1	PBANKA_0207500		cyclin-dependent kinases regulatory subunit, putative	PBANKA_0207500.1-p1	0	14	S7(Phospho): 100
SIVSETIEK	1xTMT6plex [K9]; 1xTMT6plex [N-Term]; 1xPhospho [S4(100)]	2	PBANKA_0207500		cyclin-dependent kinases regulatory subunit, putative	0	-0.08	0.12	0.18	0.04	-0.01	1	1	1	1	1		33
	Annotated Sequence	# Proteins	Master Protein Accessions			Protein Accessions	# Missed Cleavages	Ions Score	ptmRS: Best Site Probabilities
	sIVsETIEk	1	PBANKA_0207500		cyclin-dependent kinases regulatory subunit, putative	PBANKA_0207500.1-p1	0	33	S4(Phospho): 100
	sIVsETIEk	1	PBANKA_0207500		cyclin-dependent kinases regulatory subunit, putative	PBANKA_0207500.1-p1	0	18	S4(Phospho): 100
RHSIQFEK	1xTMT6plex [K8]; 1xTMT6plex [N-Term]; 1xPhospho [S3(100)]	2	PBANKA_0207500		cyclin-dependent kinases regulatory subunit, putative	1	-0.1	-0.25	-0.39	-0.18	-0.31	1	1	1	1	1		29
	Annotated Sequence	# Proteins	Master Protein Accessions			Protein Accessions	# Missed Cleavages	Ions Score	ptmRS: Best Site Probabilities
	rHsIQFEk	1	PBANKA_0207500		cyclin-dependent kinases regulatory subunit, putative	PBANKA_0207500.1-p1	1	29	S3(Phospho): 100
	rHsIQFEk	1	PBANKA_0207500		cyclin-dependent kinases regulatory subunit, putative	PBANKA_0207500.1-p1	1	21	S3(Phospho): 100
SASINNSNVSIDSK	1xTMT6plex [K14]; 1xTMT6plex [N-Term]; 1xPhospho [S3(100)]	2	PBANKA_0207600		asparagine-rich antigen, putative	0	-0.39	-0.37	-0.42	-0.35	-0.27							73
	Annotated Sequence	# Proteins	Master Protein Accessions			Protein Accessions	# Missed Cleavages	Ions Score	ptmRS: Best Site Probabilities
	sAsINNSNVSIDSk	1	PBANKA_0207600		asparagine-rich antigen, putative	PBANKA_0207600.1-p1	0	73	S3(Phospho): 100
	sAsINNSNVSIDSk	1	PBANKA_0207600		asparagine-rich antigen, putative	PBANKA_0207600.1-p1	0	37	S3(Phospho): 100
ALSFPENFQETEMR	1xOxidation [M13]; 1xTMT6plex [N-Term]; 1xPhospho [S3(100)]	2	PBANKA_0207600		asparagine-rich antigen, putative	0	-0.04	-0.26	-0.35	-0.06	-0.39							40
	Annotated Sequence	# Proteins	Master Protein Accessions			Protein Accessions	# Missed Cleavages	Ions Score	ptmRS: Best Site Probabilities
	aLsFPENFQETEmR	1	PBANKA_0207600		asparagine-rich antigen, putative	PBANKA_0207600.1-p1	0	40	S3(Phospho): 100
	aLsFPENFQETEmR	1	PBANKA_0207600		asparagine-rich antigen, putative	PBANKA_0207600.1-p1	0	32	S3(Phospho): 100
ALSFPENFQETEMR	1xTMT6plex [N-Term]; 1xPhospho [S3(100)]	1	PBANKA_0207600		asparagine-rich antigen, putative	0	-0.01	-0.46	0.56	0.24	-0.21							44
	Annotated Sequence	# Proteins	Master Protein Accessions			Protein Accessions	# Missed Cleavages	Ions Score	ptmRS: Best Site Probabilities
	aLsFPENFQETEMR	1	PBANKA_0207600		asparagine-rich antigen, putative	PBANKA_0207600.1-p1	0	44	S3(Phospho): 100
SQSENIYNCK	1xCarbamidomethyl [C9]; 1xTMT6plex [K10]; 1xTMT6plex [N-Term]; 1xPhospho [S3(100)]	4	PBANKA_0207600		asparagine-rich antigen, putative	0	-0.19	-0.2	-0.25	-0.24	0.05	1	1	1	1	1		41
	Annotated Sequence	# Proteins	Master Protein Accessions			Protein Accessions	# Missed Cleavages	Ions Score	ptmRS: Best Site Probabilities
	sQsENIYNck	1	PBANKA_0207600		asparagine-rich antigen, putative	PBANKA_0207600.1-p1	0	41	S3(Phospho): 100
	sQsENIYNck	1	PBANKA_0207600		asparagine-rich antigen, putative	PBANKA_0207600.1-p1	0	32	S3(Phospho): 100
	sQsENIYNck	1	PBANKA_0207600		asparagine-rich antigen, putative	PBANKA_0207600.1-p1	0	26	S3(Phospho): 100
	sQsENIYNck	1	PBANKA_0207600		asparagine-rich antigen, putative	PBANKA_0207600.1-p1	0	18	S3(Phospho): 100
SSTISLDDVISLR	1xTMT6plex [N-Term]; 1xPhospho [T3(100)]	5	PBANKA_0208400	MFR2	major facilitator superfamily-related transporter, putative	0	-0.66	-0.81	-0.92	-0.85	-0.79	1	1	1	1	1		58
	Annotated Sequence	# Proteins	Master Protein Accessions			Protein Accessions	# Missed Cleavages	Ions Score	ptmRS: Best Site Probabilities
	sStISLDDVISLR	1	PBANKA_0208400	MFR2	major facilitator superfamily-related transporter, putative	PBANKA_0208400.1-p1	0	58	T3(Phospho): 100
	sStISLDDVISLR	1	PBANKA_0208400	MFR2	major facilitator superfamily-related transporter, putative	PBANKA_0208400.1-p1	0	53	T3(Phospho): 99.74
	sStISLDDVISLR	1	PBANKA_0208400	MFR2	major facilitator superfamily-related transporter, putative	PBANKA_0208400.1-p1	0	50	T3(Phospho): 99.7
	sStISLDDVISLR	1	PBANKA_0208400	MFR2	major facilitator superfamily-related transporter, putative	PBANKA_0208400.1-p1	0	31	T3(Phospho): 100
	ssTISLDDVISLR	1	PBANKA_0208400	MFR2	major facilitator superfamily-related transporter, putative	PBANKA_0208400.1-p1	0	24	S2(Phospho): 99.65
NSNSNILEIK	1xTMT6plex [K10]; 1xTMT6plex [N-Term]; 1xPhospho [S4(100)]	2	PBANKA_0208400	MFR2	major facilitator superfamily-related transporter, putative	0	0.12	0.24	0.26	0.22	0.23	1	1	1	1	1		33
	Annotated Sequence	# Proteins	Master Protein Accessions			Protein Accessions	# Missed Cleavages	Ions Score	ptmRS: Best Site Probabilities
	nSNsNILEIk	1	PBANKA_0208400	MFR2	major facilitator superfamily-related transporter, putative	PBANKA_0208400.1-p1	0	33	S4(Phospho): 100
	nSNsNILEIk	1	PBANKA_0208400	MFR2	major facilitator superfamily-related transporter, putative	PBANKA_0208400.1-p1	0	30	S4(Phospho): 100
SSNTLQELEGYLVSENK	1xTMT6plex [K17]; 1xTMT6plex [N-Term]; 1xPhospho [T4(99.5)]	2	PBANKA_0208400	MFR2	major facilitator superfamily-related transporter, putative	0	0.49	0.31	0.68	0.56	0.46	1	1	1	1	1		45
	Annotated Sequence	# Proteins	Master Protein Accessions			Protein Accessions	# Missed Cleavages	Ions Score	ptmRS: Best Site Probabilities
	sSNtLQELEGYLVSENk	1	PBANKA_0208400	MFR2	major facilitator superfamily-related transporter, putative	PBANKA_0208400.1-p1	0	45	T4(Phospho): 99.73
	sSNtLQELEGYLVSENk	1	PBANKA_0208400	MFR2	major facilitator superfamily-related transporter, putative	PBANKA_0208400.1-p1	0	42	T4(Phospho): 99.52
TYYNNISLR	1xTMT6plex [N-Term]; 1xPhospho [S7(100)]	2	PBANKA_0208400	MFR2	major facilitator superfamily-related transporter, putative	0	0.1	0.25	0.3	0.16	0.16	1	1	1	1	1		27
	Annotated Sequence	# Proteins	Master Protein Accessions			Protein Accessions	# Missed Cleavages	Ions Score	ptmRS: Best Site Probabilities
	tYYNNIsLR	1	PBANKA_0208400	MFR2	major facilitator superfamily-related transporter, putative	PBANKA_0208400.1-p1	0	27	S7(Phospho): 100
	tYYNNIsLR	1	PBANKA_0208400	MFR2	major facilitator superfamily-related transporter, putative	PBANKA_0208400.1-p1	0	26	S7(Phospho): 100
RSSTISLDDVISLR	1xTMT6plex [N-Term]; 1xPhospho [S3(99.5)]	4	PBANKA_0208400	MFR2	major facilitator superfamily-related transporter, putative	1	0.06	-0.01	-0.06	0.12	0.15	1	1	1	1	1		47
	Annotated Sequence	# Proteins	Master Protein Accessions			Protein Accessions	# Missed Cleavages	Ions Score	ptmRS: Best Site Probabilities
	rSsTISLDDVISLR	1	PBANKA_0208400	MFR2	major facilitator superfamily-related transporter, putative	PBANKA_0208400.1-p1	1	47	S3(Phospho): 99.52
	rSStISLDDVISLR	1	PBANKA_0208400	MFR2	major facilitator superfamily-related transporter, putative	PBANKA_0208400.1-p1	1	32	T4(Phospho): 99.01
	rSsTISLDDVISLR	1	PBANKA_0208400	MFR2	major facilitator superfamily-related transporter, putative	PBANKA_0208400.1-p1	1	31	S3(Phospho): 99.51
	rSStISLDDVISLR	1	PBANKA_0208400	MFR2	major facilitator superfamily-related transporter, putative	PBANKA_0208400.1-p1	1	23	S2(Phospho): 49.91; S3(Phospho): 49.91
RSSTISLDDVISLR	1xTMT6plex [N-Term]; 2xPhospho [S3(100); T4(100)]	1	PBANKA_0208400	MFR2	major facilitator superfamily-related transporter, putative	1	-0.28	-0.3	0.14	0.16	0.22							66
	Annotated Sequence	# Proteins	Master Protein Accessions			Protein Accessions	# Missed Cleavages	Ions Score	ptmRS: Best Site Probabilities
	rSstISLDDVISLR	1	PBANKA_0208400	MFR2	major facilitator superfamily-related transporter, putative	PBANKA_0208400.1-p1	1	66	S3(Phospho): 100; T4(Phospho): 100
KNSNSNILEIK	2xTMT6plex [K1; K11]; 1xTMT6plex [N-Term]; 1xPhospho [S5(100)]	2	PBANKA_0208400	MFR2	major facilitator superfamily-related transporter, putative	1	0.17	0.31	0.41	0.42	0.31							15
	Annotated Sequence	# Proteins	Master Protein Accessions			Protein Accessions	# Missed Cleavages	Ions Score	ptmRS: Best Site Probabilities
	kNsNSNILEIk	1	PBANKA_0208400	MFR2	major facilitator superfamily-related transporter, putative	PBANKA_0208400.1-p1	1	15	S3(Phospho): 100
	kNSNsNILEIk	1	PBANKA_0208400	MFR2	major facilitator superfamily-related transporter, putative	PBANKA_0208400.1-p1	1	13	S5(Phospho): 100
RESHDYSDIYYTSR	1xTMT6plex [N-Term]; 1xPhospho [S3(100)]	2	PBANKA_0208800	UBP1	ubiquitin carboxyl-terminal hydrolase 1, putative	1	-0.12	-0.24	-0.41	-0.18	-0.25	1	1	1	1	1		16
	Annotated Sequence	# Proteins	Master Protein Accessions			Protein Accessions	# Missed Cleavages	Ions Score	ptmRS: Best Site Probabilities
	rEsHDYSDIYYTSR	1	PBANKA_0208800	UBP1	ubiquitin carboxyl-terminal hydrolase 1, putative	PBANKA_0208800.1-p1	1	16	S3(Phospho): 100
	rEsHDYSDIYYTSR	1	PBANKA_0208800	UBP1	ubiquitin carboxyl-terminal hydrolase 1, putative	PBANKA_0208800.1-p1	1	14	S3(Phospho): 100
NHNNIKSNEYEQFLR	1xTMT6plex [K6]; 1xTMT6plex [N-Term]; 1xPhospho [S7(100)]	1	PBANKA_0208800	UBP1	ubiquitin carboxyl-terminal hydrolase 1, putative	1	-0.21	-0.11	-0.16	0.01	0.01							15
	Annotated Sequence	# Proteins	Master Protein Accessions			Protein Accessions	# Missed Cleavages	Ions Score	ptmRS: Best Site Probabilities
	nHNNIksNEYEQFLR	1	PBANKA_0208800	UBP1	ubiquitin carboxyl-terminal hydrolase 1, putative	PBANKA_0208800.1-p1	1	15	S7(Phospho): 100
TLSPNSSFIK	1xTMT6plex [K10]; 1xTMT6plex [N-Term]; 1xPhospho [S3(100)]	4	PBANKA_0208800	UBP1	ubiquitin carboxyl-terminal hydrolase 1, putative	0	0.05	-0.13	-0.41	-0.32	-0.08	1	1	1	1	1		47
	Annotated Sequence	# Proteins	Master Protein Accessions			Protein Accessions	# Missed Cleavages	Ions Score	ptmRS: Best Site Probabilities
	tLsPNSSFIk	1	PBANKA_0208800	UBP1	ubiquitin carboxyl-terminal hydrolase 1, putative	PBANKA_0208800.1-p1	0	47	S3(Phospho): 100
	tLsPNSSFIk	1	PBANKA_0208800	UBP1	ubiquitin carboxyl-terminal hydrolase 1, putative	PBANKA_0208800.1-p1	0	45	S3(Phospho): 100
	tLsPNSSFIk	1	PBANKA_0208800	UBP1	ubiquitin carboxyl-terminal hydrolase 1, putative	PBANKA_0208800.1-p1	0	28	S3(Phospho): 99.7
	tLsPNSSFIk	1	PBANKA_0208800	UBP1	ubiquitin carboxyl-terminal hydrolase 1, putative	PBANKA_0208800.1-p1	0	27	S3(Phospho): 100
NLSNSFEDNTLEFLPQNVDDNSNNFQK	1xTMT6plex [K27]; 1xTMT6plex [N-Term]; 1xPhospho [S5(100)]	2	PBANKA_0208800	UBP1	ubiquitin carboxyl-terminal hydrolase 1, putative	0	-0.12	-0.12	-0.09	-0.31	-0.04							61
	Annotated Sequence	# Proteins	Master Protein Accessions			Protein Accessions	# Missed Cleavages	Ions Score	ptmRS: Best Site Probabilities
	nLSNsFEDNTLEFLPQNVDDNSNNFQk	1	PBANKA_0208800	UBP1	ubiquitin carboxyl-terminal hydrolase 1, putative	PBANKA_0208800.1-p1	0	61	S5(Phospho): 100
	nLSNsFEDNTLEFLPQNVDDNSNNFQk	1	PBANKA_0208800	UBP1	ubiquitin carboxyl-terminal hydrolase 1, putative	PBANKA_0208800.1-p1	0	50	S5(Phospho): 100
IFTSELSGLK	1xTMT6plex [K10]; 1xTMT6plex [N-Term]; 1xPhospho [S7(100)]	4	PBANKA_0209200	PIESP15	parasite-infected erythrocyte surface protein	0	0.79	1.02	0.81	0.93	0.86	1	0.452359	0.865148	0.797455	1		54
	Annotated Sequence	# Proteins	Master Protein Accessions			Protein Accessions	# Missed Cleavages	Ions Score	ptmRS: Best Site Probabilities
	iFTSELsGLk	1	PBANKA_0209200	PIESP15	parasite-infected erythrocyte surface protein	PBANKA_0209200.1-p1	0	54	S7(Phospho): 100
	iFTSELsGLk	1	PBANKA_0209200	PIESP15	parasite-infected erythrocyte surface protein	PBANKA_0209200.1-p1	0	51	S7(Phospho): 100
	iFTsELSGLk	1	PBANKA_0209200	PIESP15	parasite-infected erythrocyte surface protein	PBANKA_0209200.1-p1	0	26	T3(Phospho): 99.69
	iFtSELSGLk	1	PBANKA_0209200	PIESP15	parasite-infected erythrocyte surface protein	PBANKA_0209200.1-p1	0	20	T3(Phospho): 99.74
LTSKIDNNQELK	2xTMT6plex [K4; K12]; 1xTMT6plex [N-Term]; 1xPhospho [T/S]	1	PBANKA_0209200	PIESP15	parasite-infected erythrocyte surface protein	1	0.73	0.62	0.51	0.56	0.87							20
	Annotated Sequence	# Proteins	Master Protein Accessions			Protein Accessions	# Missed Cleavages	Ions Score	ptmRS: Best Site Probabilities
	lTskIDNNQELk	1	PBANKA_0209200	PIESP15	parasite-infected erythrocyte surface protein	PBANKA_0209200.1-p1	1	20	T2(Phospho): 50; S3(Phospho): 50
NLFHSHAQHHK	1xTMT6plex [K11]; 1xTMT6plex [N-Term]; 1xPhospho [S5(100)]	1	PBANKA_0209200	PIESP15	parasite-infected erythrocyte surface protein	0	1.1	0.58	1.05	0.76	0.82							15
	Annotated Sequence	# Proteins	Master Protein Accessions			Protein Accessions	# Missed Cleavages	Ions Score	ptmRS: Best Site Probabilities
	nLFHsHAQHHk	1	PBANKA_0209200	PIESP15	parasite-infected erythrocyte surface protein	PBANKA_0209200.1-p1	0	15	S5(Phospho): 100
IGSESDAIK	1xTMT6plex [K9]; 1xTMT6plex [N-Term]; 1xPhospho [S3(100)]	1	PBANKA_0210400	PMS1	DNA mismatch repair protein PMS1, putative	0	0.23	0.26	0.27	0.13	-0.21							29
	Annotated Sequence	# Proteins	Master Protein Accessions			Protein Accessions	# Missed Cleavages	Ions Score	ptmRS: Best Site Probabilities
	iGsESDAIk	1	PBANKA_0210400	PMS1	DNA mismatch repair protein PMS1, putative	PBANKA_0210400.1-p1	0	29	S3(Phospho): 100
IGSESDAIKTEVIK	2xTMT6plex [K9; K14]; 1xTMT6plex [N-Term]; 1xPhospho [S3(100)]	1	PBANKA_0210400	PMS1	DNA mismatch repair protein PMS1, putative	1	0.07	0.04	0.44	0.06	0.36							13
	Annotated Sequence	# Proteins	Master Protein Accessions			Protein Accessions	# Missed Cleavages	Ions Score	ptmRS: Best Site Probabilities
	iGSEsDAIkTEVIk	1	PBANKA_0210400	PMS1	DNA mismatch repair protein PMS1, putative	PBANKA_0210400.1-p1	1	13	S3(Phospho): 100
NILHNSR	1xTMT6plex [N-Term]; 1xPhospho [S6(100)]	1	PBANKA_0210400	PMS1	DNA mismatch repair protein PMS1, putative	0											No Quan Values	16
	Annotated Sequence	# Proteins	Master Protein Accessions			Protein Accessions	# Missed Cleavages	Ions Score	ptmRS: Best Site Probabilities
	nILHNsR	1	PBANKA_0210400	PMS1	DNA mismatch repair protein PMS1, putative	PBANKA_0210400.1-p1	0	16	S6(Phospho): 100
NFSFSPQNYK	1xTMT6plex [K10]; 1xTMT6plex [N-Term]; 1xPhospho [S3(100)]	2	PBANKA_0210500		conserved Plasmodium protein, unknown function	0	0.04	0.2	0.1	0.26	0.15	1	1	1	1	1		33
	Annotated Sequence	# Proteins	Master Protein Accessions			Protein Accessions	# Missed Cleavages	Ions Score	ptmRS: Best Site Probabilities
	nFsFSPQNYk	1	PBANKA_0210500		conserved Plasmodium protein, unknown function	PBANKA_0210500.1-p1	0	33	S3(Phospho): 100
	nFsFSPQNYk	1	PBANKA_0210500		conserved Plasmodium protein, unknown function	PBANKA_0210500.1-p1	0	17	S3(Phospho): 100
YNENIYHSFSK	1xTMT6plex [K11]; 1xTMT6plex [N-Term]; 1xPhospho [S8(100)]	3	PBANKA_0210500		conserved Plasmodium protein, unknown function	0	-0.02	0.15	0.42	0.26	0.32	1	1	1	1	1		40
	Annotated Sequence	# Proteins	Master Protein Accessions			Protein Accessions	# Missed Cleavages	Ions Score	ptmRS: Best Site Probabilities
	yNENIYHsFSk	1	PBANKA_0210500		conserved Plasmodium protein, unknown function	PBANKA_0210500.1-p1	0	40	S8(Phospho): 100
	yNENIYHsFSk	1	PBANKA_0210500		conserved Plasmodium protein, unknown function	PBANKA_0210500.1-p1	0	35	S8(Phospho): 100
	yNENIYHSFsk	1	PBANKA_0210500		conserved Plasmodium protein, unknown function	PBANKA_0210500.1-p1	0	23	S10(Phospho): 99.7
NFNSLNNIENVK	1xTMT6plex [K12]; 1xTMT6plex [N-Term]; 1xPhospho [S4(100)]	3	PBANKA_0210500		conserved Plasmodium protein, unknown function	0	-0.01	0.3	0.2	0.2	0.26	1	1	1	1	1		48
	Annotated Sequence	# Proteins	Master Protein Accessions			Protein Accessions	# Missed Cleavages	Ions Score	ptmRS: Best Site Probabilities
	nFNsLNNIENVk	1	PBANKA_0210500		conserved Plasmodium protein, unknown function	PBANKA_0210500.1-p1	0	48	S4(Phospho): 100
	nFNsLNNIENVk	1	PBANKA_0210500		conserved Plasmodium protein, unknown function	PBANKA_0210500.1-p1	0	27	S4(Phospho): 100
	nFNsLNNIENVk	1	PBANKA_0210500		conserved Plasmodium protein, unknown function	PBANKA_0210500.1-p1	0	20	S4(Phospho): 100
QSTNQLPQQNKDDESEFEFNDSLTTDAILNK	2xTMT6plex [K11; K31]; 1xTMT6plex [N-Term]; 1xPhospho [S15(100)]	2	PBANKA_0210500		conserved Plasmodium protein, unknown function	1	-0.25	-0.43	-0.43	-0.32	-0.23	1	1	1	1	1		29
	Annotated Sequence	# Proteins	Master Protein Accessions			Protein Accessions	# Missed Cleavages	Ions Score	ptmRS: Best Site Probabilities
	qSTNQLPQQNkDDESEFEFNDsLTTDAILNk	1	PBANKA_0210500		conserved Plasmodium protein, unknown function	PBANKA_0210500.1-p1	1	29	S15(Phospho): 100
	qSTNQLPQQNkDDEsEFEFNDSLTTDAILNk	1	PBANKA_0210500		conserved Plasmodium protein, unknown function	PBANKA_0210500.1-p1	1	23	S15(Phospho): 100
QRTMELEHNSLTEQK	1xTMT6plex [K15]; 1xTMT6plex [N-Term]; 1xPhospho [T3(100)]	1	PBANKA_0210600		ubiquitin carboxyl-terminal hydrolase, putative	1	-0.05	-0.19	-0.42	0.14	-0.35							15
	Annotated Sequence	# Proteins	Master Protein Accessions			Protein Accessions	# Missed Cleavages	Ions Score	ptmRS: Best Site Probabilities
	qRtMELEHNSLTEQk	1	PBANKA_0210600		ubiquitin carboxyl-terminal hydrolase, putative	PBANKA_0210600.1-p1	1	15	T3(Phospho): 99.99
NIINITNLGSHTIK	1xTMT6plex [K14]; 1xTMT6plex [N-Term]; 1xPhospho [S10(100)]	2	PBANKA_0210600		ubiquitin carboxyl-terminal hydrolase, putative	0	-0.03	0.09	0.24	0.03	0.19	1	1	1	1	1		56
	Annotated Sequence	# Proteins	Master Protein Accessions			Protein Accessions	# Missed Cleavages	Ions Score	ptmRS: Best Site Probabilities
	nIINITNLGsHTIk	1	PBANKA_0210600		ubiquitin carboxyl-terminal hydrolase, putative	PBANKA_0210600.1-p1	0	56	S10(Phospho): 99.75
	nIINITNLGsHTIk	1	PBANKA_0210600		ubiquitin carboxyl-terminal hydrolase, putative	PBANKA_0210600.1-p1	0	46	S10(Phospho): 100
HITEIDK	1xTMT6plex [K7]; 1xTMT6plex [N-Term]; 1xPhospho [T3(100)]	2	PBANKA_0210600		ubiquitin carboxyl-terminal hydrolase, putative	0	-0.15	-0.24	-0.34	-0.28	-0.37	1	1	1	1	1		22
	Annotated Sequence	# Proteins	Master Protein Accessions			Protein Accessions	# Missed Cleavages	Ions Score	ptmRS: Best Site Probabilities
	hItEIDk	1	PBANKA_0210600		ubiquitin carboxyl-terminal hydrolase, putative	PBANKA_0210600.1-p1	0	22	T3(Phospho): 100
	hItEIDk	1	PBANKA_0210600		ubiquitin carboxyl-terminal hydrolase, putative	PBANKA_0210600.1-p1	0	21	T3(Phospho): 100
NIINITNLGSHTIKK	2xTMT6plex [K14; K15]; 1xTMT6plex [N-Term]; 1xPhospho [S10(100)]	2	PBANKA_0210600		ubiquitin carboxyl-terminal hydrolase, putative	1	0.16	0.08	0.22	0.3	0.43	1	1	1	1	1		60
	Annotated Sequence	# Proteins	Master Protein Accessions			Protein Accessions	# Missed Cleavages	Ions Score	ptmRS: Best Site Probabilities
	nIINITNLGsHTIkk	1	PBANKA_0210600		ubiquitin carboxyl-terminal hydrolase, putative	PBANKA_0210600.1-p1	1	60	S10(Phospho): 100
	nIINITNLGsHTIkk	1	PBANKA_0210600		ubiquitin carboxyl-terminal hydrolase, putative	PBANKA_0210600.1-p1	1	49	S10(Phospho): 100
TNLSLSEYDHVISK	1xTMT6plex [K14]; 1xTMT6plex [N-Term]; 1xPhospho [S6(100)]	4	PBANKA_0210600		ubiquitin carboxyl-terminal hydrolase, putative	0	0.11	0.04	0.15	0.07	0.18	1	1	1	1	1		52
	Annotated Sequence	# Proteins	Master Protein Accessions			Protein Accessions	# Missed Cleavages	Ions Score	ptmRS: Best Site Probabilities
	tNLSLsEYDHVISk	1	PBANKA_0210600		ubiquitin carboxyl-terminal hydrolase, putative	PBANKA_0210600.1-p1	0	52	S6(Phospho): 100
	tNLsLSEYDHVISk	1	PBANKA_0210600		ubiquitin carboxyl-terminal hydrolase, putative	PBANKA_0210600.1-p1	0	42	S4(Phospho): 99.63
	tNLsLSEYDHVISk	1	PBANKA_0210600		ubiquitin carboxyl-terminal hydrolase, putative	PBANKA_0210600.1-p1	0	33	S4(Phospho): 99.63
	tNLSLsEYDHVISk	1	PBANKA_0210600		ubiquitin carboxyl-terminal hydrolase, putative	PBANKA_0210600.1-p1	0	32	S6(Phospho): 100
NQYNNISGNDNSIQISDIK	1xTMT6plex [K19]; 1xTMT6plex [N-Term]; 1xPhospho [S7(100)]	1	PBANKA_0210600		ubiquitin carboxyl-terminal hydrolase, putative	0											No Quan Values	68
	Annotated Sequence	# Proteins	Master Protein Accessions			Protein Accessions	# Missed Cleavages	Ions Score	ptmRS: Best Site Probabilities
	nQYNNIsGNDNSIQISDIk	1	PBANKA_0210600		ubiquitin carboxyl-terminal hydrolase, putative	PBANKA_0210600.1-p1	0	68	S7(Phospho): 100
SIDNAPK	1xTMT6plex [K7]; 1xTMT6plex [N-Term]; 1xPhospho [S1(100)]	2	PBANKA_0210600		ubiquitin carboxyl-terminal hydrolase, putative	0	0.24	0.2	0.3	0.31	0.19	1	1	1	1	1		18
	Annotated Sequence	# Proteins	Master Protein Accessions			Protein Accessions	# Missed Cleavages	Ions Score	ptmRS: Best Site Probabilities
	sIDNAPk	1	PBANKA_0210600		ubiquitin carboxyl-terminal hydrolase, putative	PBANKA_0210600.1-p1	0	18	S1(Phospho): 100
	sIDNAPk	1	PBANKA_0210600		ubiquitin carboxyl-terminal hydrolase, putative	PBANKA_0210600.1-p1	0	17	S1(Phospho): 100
SIQIKSIDNAPK	2xTMT6plex [K5; K12]; 1xTMT6plex [N-Term]; 1xPhospho [S6(100)]	1	PBANKA_0210600		ubiquitin carboxyl-terminal hydrolase, putative	1	-0.28	0.31	0.71	0.38	0.45							18
	Annotated Sequence	# Proteins	Master Protein Accessions			Protein Accessions	# Missed Cleavages	Ions Score	ptmRS: Best Site Probabilities
	sIQIksIDNAPk	1	PBANKA_0210600		ubiquitin carboxyl-terminal hydrolase, putative	PBANKA_0210600.1-p1	1	18	S6(Phospho): 100
SELIPSTYNNVETTNDSIYNMESHLDNIHYEK	1xTMT6plex [K32]; 1xTMT6plex [N-Term]; 1xPhospho [S23(100)]	2	PBANKA_0210600		ubiquitin carboxyl-terminal hydrolase, putative	0	-0.35	-0.32	-0.37	-0.35	-0.07							32
	Annotated Sequence	# Proteins	Master Protein Accessions			Protein Accessions	# Missed Cleavages	Ions Score	ptmRS: Best Site Probabilities
	sELIPSTYNNVETTNDSIYNMEsHLDNIHYEk	1	PBANKA_0210600		ubiquitin carboxyl-terminal hydrolase, putative	PBANKA_0210600.1-p1	0	32	S23(Phospho): 100
	sELIPSTYNNVETTNDsIYNMESHLDNIHYEk	1	PBANKA_0210600		ubiquitin carboxyl-terminal hydrolase, putative	PBANKA_0210600.1-p1	0	15	T13(Phospho): 19.89; T14(Phospho): 19.89; S17(Phospho): 19.89; Y19(Phospho): 19.89; S23(Phospho): 19.89
KQTENNFEINK	2xTMT6plex [K1; K11]; 1xTMT6plex [N-Term]; 1xPhospho [T3(100)]	2	PBANKA_0210600		ubiquitin carboxyl-terminal hydrolase, putative	1	0.24	0.24	0.31	0.16	0.31							31
	Annotated Sequence	# Proteins	Master Protein Accessions			Protein Accessions	# Missed Cleavages	Ions Score	ptmRS: Best Site Probabilities
	kQtENNFEINk	1	PBANKA_0210600		ubiquitin carboxyl-terminal hydrolase, putative	PBANKA_0210600.1-p1	1	31	T3(Phospho): 100
	kQtENNFEINk	1	PBANKA_0210600		ubiquitin carboxyl-terminal hydrolase, putative	PBANKA_0210600.1-p1	1	20	T3(Phospho): 100
KTNLSLSEYDHVISK	2xTMT6plex [K1; K15]; 1xTMT6plex [N-Term]; 1xPhospho [S5(99.5)]	2	PBANKA_0210600		ubiquitin carboxyl-terminal hydrolase, putative	1	0.31	-0.04	0.04	-0.01	0.26	1	1	1	1	1		19
	Annotated Sequence	# Proteins	Master Protein Accessions			Protein Accessions	# Missed Cleavages	Ions Score	ptmRS: Best Site Probabilities
	kTNLsLSEYDHVISk	1	PBANKA_0210600		ubiquitin carboxyl-terminal hydrolase, putative	PBANKA_0210600.1-p1	1	19	S5(Phospho): 99.54
	kTNLsLSEYDHVISk	1	PBANKA_0210600		ubiquitin carboxyl-terminal hydrolase, putative	PBANKA_0210600.1-p1	1	18	S5(Phospho): 99.45
NENMLHQNSIQCK	1xCarbamidomethyl [C12]; 1xTMT6plex [K13]; 1xTMT6plex [N-Term]; 1xPhospho [S9(100)]	2	PBANKA_0210600		ubiquitin carboxyl-terminal hydrolase, putative	0	0.02	-0.16	-0.2	-0.11	-0.29	1	1	1	1	1		51
	Annotated Sequence	# Proteins	Master Protein Accessions			Protein Accessions	# Missed Cleavages	Ions Score	ptmRS: Best Site Probabilities
	nENMLHQNsIQck	1	PBANKA_0210600		ubiquitin carboxyl-terminal hydrolase, putative	PBANKA_0210600.1-p1	0	51	S9(Phospho): 100
	nENMLHQNsIQck	1	PBANKA_0210600		ubiquitin carboxyl-terminal hydrolase, putative	PBANKA_0210600.1-p1	0	49	S9(Phospho): 100
THEPVEYTNLGSFSNLINDMNVK	1xOxidation [M20]; 1xTMT6plex [K23]; 1xTMT6plex [N-Term]; 1xPhospho [S/T/Y]	2	PBANKA_0210700		conserved Plasmodium protein, unknown function	0	-0.2	-0.21	-0.2	-0.14	0.06	1	1	1	1	1		83
	Annotated Sequence	# Proteins	Master Protein Accessions			Protein Accessions	# Missed Cleavages	Ions Score	ptmRS: Best Site Probabilities
	tHEPVEYTNLGsFSNLINDmNVk	1	PBANKA_0210700		conserved Plasmodium protein, unknown function	PBANKA_0210700.1-p1	0	83	S12(Phospho): 50; S14(Phospho): 50
	tHEPVEYTNLGSFsNLINDmNVk	1	PBANKA_0210700		conserved Plasmodium protein, unknown function	PBANKA_0210700.1-p1	0	58	S12(Phospho): 50; S14(Phospho): 50
THEPVEYTNLGSFSNLINDMNVK	1xTMT6plex [K23]; 1xTMT6plex [N-Term]; 1xPhospho [S12(100)]	4	PBANKA_0210700		conserved Plasmodium protein, unknown function	0	0.18	0.14	0.29	0.14	0.21	1	1	0.855147	1	1		85
	Annotated Sequence	# Proteins	Master Protein Accessions			Protein Accessions	# Missed Cleavages	Ions Score	ptmRS: Best Site Probabilities
	tHEPVEYTNLGsFSNLINDMNVk	1	PBANKA_0210700		conserved Plasmodium protein, unknown function	PBANKA_0210700.1-p1	0	85	S12(Phospho): 100
	tHEPVEYTNLGsFSNLINDMNVk	1	PBANKA_0210700		conserved Plasmodium protein, unknown function	PBANKA_0210700.1-p1	0	81	S12(Phospho): 100
	tHEPVEYTNLGsFSNLINDMNVk	1	PBANKA_0210700		conserved Plasmodium protein, unknown function	PBANKA_0210700.1-p1	0	68	S12(Phospho): 100
	tHEPVEYTNLGsFSNLINDMNVk	1	PBANKA_0210700		conserved Plasmodium protein, unknown function	PBANKA_0210700.1-p1	0	59	S12(Phospho): 99.48
ISCSISQNYEIR	1xCarbamidomethyl [C3]; 1xTMT6plex [N-Term]; 1xPhospho [S6(100)]	1	PBANKA_0210700		conserved Plasmodium protein, unknown function	0											No Quan Values	21
	Annotated Sequence	# Proteins	Master Protein Accessions			Protein Accessions	# Missed Cleavages	Ions Score	ptmRS: Best Site Probabilities
	iScSIsQNYEIR	1	PBANKA_0210700		conserved Plasmodium protein, unknown function	PBANKA_0210700.1-p1	0	21	S6(Phospho): 100
SGNDITSDGGNK	1xTMT6plex [K12]; 1xTMT6plex [N-Term]; 1xPhospho [S7(99.7)]	3	PBANKA_0211900		cation transporting ATPase, putative	0	-0.06	-0.22	-0.28	-0.13	-0.25	1	1	1	1	1		25
	Annotated Sequence	# Proteins	Master Protein Accessions			Protein Accessions	# Missed Cleavages	Ions Score	ptmRS: Best Site Probabilities
	sGNDITsDGGNk	1	PBANKA_0211900		cation transporting ATPase, putative	PBANKA_0211900.1-p1	0	25	S7(Phospho): 99.68
	sGNDITsDGGNk	1	PBANKA_0211900		cation transporting ATPase, putative	PBANKA_0211900.1-p1	0	21	S7(Phospho): 100
	sGNDITsDGGNk	1	PBANKA_0211900		cation transporting ATPase, putative	PBANKA_0211900.1-p1	0	20	T6(Phospho): 50; S7(Phospho): 50
SGNDITSDGGNKFSEFFISSK	2xTMT6plex [K12; K21]; 1xTMT6plex [N-Term]; 1xPhospho [S7(100)]	3	PBANKA_0211900		cation transporting ATPase, putative	1	-0.26	-0.45	-0.44	-0.37	-0.18	1	0.311219	0.24213	0.854151	1		40
	Annotated Sequence	# Proteins	Master Protein Accessions			Protein Accessions	# Missed Cleavages	Ions Score	ptmRS: Best Site Probabilities
	sGNDITsDGGNkFSEFFISSk	1	PBANKA_0211900		cation transporting ATPase, putative	PBANKA_0211900.1-p1	1	40	S7(Phospho): 99.48
	sGNDITsDGGNkFSEFFISSk	1	PBANKA_0211900		cation transporting ATPase, putative	PBANKA_0211900.1-p1	1	26	S7(Phospho): 99.99
	sGNDITSDGGNkFsEFFISSk	1	PBANKA_0211900		cation transporting ATPase, putative	PBANKA_0211900.1-p1	1	15	S7(Phospho): 99.99
SLTNLNK	1xTMT6plex [K7]; 1xTMT6plex [N-Term]; 1xPhospho [S1(100)]	4	PBANKA_0211900		cation transporting ATPase, putative	0	-0.13	-0.01	0.07	-0.07	0.04	1	1	1	1	1		26
	Annotated Sequence	# Proteins	Master Protein Accessions			Protein Accessions	# Missed Cleavages	Ions Score	ptmRS: Best Site Probabilities
	sLTNLNk	1	PBANKA_0211900		cation transporting ATPase, putative	PBANKA_0211900.1-p1	0	26	S1(Phospho): 100
	sLTNLNk	1	PBANKA_0211900		cation transporting ATPase, putative	PBANKA_0211900.1-p1	0	19	S1(Phospho): 100
	sLTNLNk	1	PBANKA_0211900		cation transporting ATPase, putative	PBANKA_0211900.1-p1	0	19	S1(Phospho): 100
	sLTNLNk	1	PBANKA_0211900		cation transporting ATPase, putative	PBANKA_0211900.1-p1	0	17	S1(Phospho): 100
LKTELDNNDIFHSNNNSFSTSK	2xTMT6plex [K2; K22]; 1xTMT6plex [N-Term]; 1xPhospho [S17(100)]	2	PBANKA_0211900		cation transporting ATPase, putative	1	0.24	0.31	0.38	0.22	0.4	1	1	1	1	1		63
	Annotated Sequence	# Proteins	Master Protein Accessions			Protein Accessions	# Missed Cleavages	Ions Score	ptmRS: Best Site Probabilities
	lkTELDNNDIFHSNNNsFSTSk	1	PBANKA_0211900		cation transporting ATPase, putative	PBANKA_0211900.1-p1	1	63	S17(Phospho): 100
	lkTELDNNDIFHSNNNsFSTSk	1	PBANKA_0211900		cation transporting ATPase, putative	PBANKA_0211900.1-p1	1	59	S17(Phospho): 100
MASKEFQNNNSENK	1xOxidation [M1]; 2xTMT6plex [K4; K14]; 1xTMT6plex [N-Term]; 1xPhospho [S3(100)]	1	PBANKA_0212200		conserved Plasmodium protein, unknown function	1	0.12	-0.27	-0.33	-0.16	0.1							14
	Annotated Sequence	# Proteins	Master Protein Accessions			Protein Accessions	# Missed Cleavages	Ions Score	ptmRS: Best Site Probabilities
	mAskEFQNNNSENk	1	PBANKA_0212200		conserved Plasmodium protein, unknown function	PBANKA_0212200.1-p1	1	14	S3(Phospho): 100
NSYLLNNEIR	1xTMT6plex [N-Term]; 1xPhospho [S2(100)]	1	PBANKA_0212200		conserved Plasmodium protein, unknown function	0	0.01	-0.12	-0.11	0.01	0.13							17
	Annotated Sequence	# Proteins	Master Protein Accessions			Protein Accessions	# Missed Cleavages	Ions Score	ptmRS: Best Site Probabilities
	nsYLLNNEIR	1	PBANKA_0212200		conserved Plasmodium protein, unknown function	PBANKA_0212200.1-p1	0	17	S2(Phospho): 100
RDSNIAINPFNNNIDADFR	1xTMT6plex [N-Term]; 1xPhospho [S3(100)]	2	PBANKA_0212200		conserved Plasmodium protein, unknown function	1	-0.27	0.11	0.04	-0.05	-0.12	1	1	1	1	1		80
	Annotated Sequence	# Proteins	Master Protein Accessions			Protein Accessions	# Missed Cleavages	Ions Score	ptmRS: Best Site Probabilities
	rDsNIAINPFNNNIDADFR	1	PBANKA_0212200		conserved Plasmodium protein, unknown function	PBANKA_0212200.1-p1	1	80	S3(Phospho): 100
	rDsNIAINPFNNNIDADFR	1	PBANKA_0212200		conserved Plasmodium protein, unknown function	PBANKA_0212200.1-p1	1	51	S3(Phospho): 100
RNSYLLNNEIR	1xTMT6plex [N-Term]; 1xPhospho [S3(100)]	4	PBANKA_0212200		conserved Plasmodium protein, unknown function	1	0.06	0.01	-0.01	-0.06	-0.11	1	1	1	1	1		48
	Annotated Sequence	# Proteins	Master Protein Accessions			Protein Accessions	# Missed Cleavages	Ions Score	ptmRS: Best Site Probabilities
	rNsYLLNNEIR	1	PBANKA_0212200		conserved Plasmodium protein, unknown function	PBANKA_0212200.1-p1	1	48	S3(Phospho): 100
	rNsYLLNNEIR	1	PBANKA_0212200		conserved Plasmodium protein, unknown function	PBANKA_0212200.1-p1	1	43	S3(Phospho): 100
	rNsYLLNNEIR	1	PBANKA_0212200		conserved Plasmodium protein, unknown function	PBANKA_0212200.1-p1	1	28	S3(Phospho): 100
	rNsYLLNNEIR	1	PBANKA_0212200		conserved Plasmodium protein, unknown function	PBANKA_0212200.1-p1	1	23	S3(Phospho): 100
SISPTHKPIYMK	2xTMT6plex [K7; K12]; 1xTMT6plex [N-Term]; 1xPhospho [S3(100)]	1	PBANKA_0212200		conserved Plasmodium protein, unknown function	0	-0.37	-0.33	-0.26	0.09	-0.06							13
	Annotated Sequence	# Proteins	Master Protein Accessions			Protein Accessions	# Missed Cleavages	Ions Score	ptmRS: Best Site Probabilities
	sIsPTHkPIYMk	1	PBANKA_0212200		conserved Plasmodium protein, unknown function	PBANKA_0212200.1-p1	0	13	S3(Phospho): 100
NFNTITTK	1xTMT6plex [K8]; 1xTMT6plex [N-Term]; 1xPhospho [T4(100)]	1	PBANKA_0212200		conserved Plasmodium protein, unknown function	0											No Quan Values	20
	Annotated Sequence	# Proteins	Master Protein Accessions			Protein Accessions	# Missed Cleavages	Ions Score	ptmRS: Best Site Probabilities
	nFNtITTk	1	PBANKA_0212200		conserved Plasmodium protein, unknown function	PBANKA_0212200.1-p1	0	20	T4(Phospho): 100
RFSQDQFNNYVNSIAR	1xTMT6plex [N-Term]; 1xPhospho [S3(100)]	2	PBANKA_0212200		conserved Plasmodium protein, unknown function	1	-0.1	0.25	0.39	0.14	0.26	1	1	1	1	1		31
	Annotated Sequence	# Proteins	Master Protein Accessions			Protein Accessions	# Missed Cleavages	Ions Score	ptmRS: Best Site Probabilities
	rFsQDQFNNYVNSIAR	1	PBANKA_0212200		conserved Plasmodium protein, unknown function	PBANKA_0212200.1-p1	1	31	S3(Phospho): 100
	rFsQDQFNNYVNSIAR	1	PBANKA_0212200		conserved Plasmodium protein, unknown function	PBANKA_0212200.1-p1	1	21	S3(Phospho): 100
LSSFICIGSDNLLFK	1xCarbamidomethyl [C6]; 1xTMT6plex [K15]; 1xTMT6plex [N-Term]; 1xPhospho [S3(99.7)]	2	PBANKA_0212700		RING zinc finger protein, putative	0	0.41	0.52	0.73	0.08	0.25	1	1	1	1	1		46
	Annotated Sequence	# Proteins	Master Protein Accessions			Protein Accessions	# Missed Cleavages	Ions Score	ptmRS: Best Site Probabilities
	lSsFIcIGSDNLLFk	1	PBANKA_0212700		RING zinc finger protein, putative	PBANKA_0212700.1-p1	0	46	S3(Phospho): 99.67
	lSsFIcIGSDNLLFk	1	PBANKA_0212700		RING zinc finger protein, putative	PBANKA_0212700.1-p1	0	34	S3(Phospho): 99.72
SMGSISNLEENSK	1xTMT6plex [K13]; 1xTMT6plex [N-Term]; 1xPhospho [S4(100)]	1	PBANKA_0212700		RING zinc finger protein, putative	0											No Quan Values	18
	Annotated Sequence	# Proteins	Master Protein Accessions			Protein Accessions	# Missed Cleavages	Ions Score	ptmRS: Best Site Probabilities
	sMGsISNLEENSk	1	PBANKA_0212700		RING zinc finger protein, putative	PBANKA_0212700.1-p1	0	18	S4(Phospho): 99.99
TNSNLELRR	1xTMT6plex [N-Term]; 1xPhospho [S3(100)]	1	PBANKA_0212700		RING zinc finger protein, putative	1	-0.1	-0.15	-0.39	-0.35	0.28							27
	Annotated Sequence	# Proteins	Master Protein Accessions			Protein Accessions	# Missed Cleavages	Ions Score	ptmRS: Best Site Probabilities
	tNsNLELRR	1	PBANKA_0212700		RING zinc finger protein, putative	PBANKA_0212700.1-p1	1	27	S3(Phospho): 100
IVDGIESELESEK	1xTMT6plex [K13]; 1xTMT6plex [N-Term]; 1xPhospho [S7(100)]	2	PBANKA_0212700		RING zinc finger protein, putative	0	0.31	0.22	-0.24	0.05	-0.08							57
	Annotated Sequence	# Proteins	Master Protein Accessions			Protein Accessions	# Missed Cleavages	Ions Score	ptmRS: Best Site Probabilities
	iVDGIEsELESEk	1	PBANKA_0212700		RING zinc finger protein, putative	PBANKA_0212700.1-p1	0	57	S7(Phospho): 100
	iVDGIEsELESEk	1	PBANKA_0212700		RING zinc finger protein, putative	PBANKA_0212700.1-p1	0	50	S7(Phospho): 100
KNTMEALSNK	2xTMT6plex [K1; K10]; 1xTMT6plex [N-Term]; 1xPhospho [T3(100)]	1	PBANKA_0212700		RING zinc finger protein, putative	1											No Quan Values	20
	Annotated Sequence	# Proteins	Master Protein Accessions			Protein Accessions	# Missed Cleavages	Ions Score	ptmRS: Best Site Probabilities
	kNtMEALSNk	1	PBANKA_0212700		RING zinc finger protein, putative	PBANKA_0212700.1-p1	1	20	T3(Phospho): 100
LEELKNSTSLNPSDGK	2xTMT6plex [K5; K16]; 1xTMT6plex [N-Term]; 1xPhospho [S9(99.4)]	1	PBANKA_0212700		RING zinc finger protein, putative	1											No Quan Values	14
	Annotated Sequence	# Proteins	Master Protein Accessions			Protein Accessions	# Missed Cleavages	Ions Score	ptmRS: Best Site Probabilities
	lEELkNSTsLNPSDGk	1	PBANKA_0212700		RING zinc finger protein, putative	PBANKA_0212700.1-p1	1	14	S9(Phospho): 99.39
LEINDNELNNKNEGNNTFLHSSSDSYNPNMANIYSR	1xTMT6plex [K11]; 1xTMT6plex [N-Term]; 1xPhospho [S/Y/T]	1	PBANKA_0213200		conserved Plasmodium protein, unknown function	1	-0.11	-0.11	-0.08	0.22	-0.53							18
	Annotated Sequence	# Proteins	Master Protein Accessions			Protein Accessions	# Missed Cleavages	Ions Score	ptmRS: Best Site Probabilities
	lEINDNELNNkNEGNNTFLHSSSDSyNPNMANIYSR	1	PBANKA_0213200		conserved Plasmodium protein, unknown function	PBANKA_0213200.1-p1	1	18	S21(Phospho): 19.97; S22(Phospho): 19.97; S23(Phospho): 19.97; S25(Phospho): 19.97; Y26(Phospho): 19.97
SLGSALSK	1xTMT6plex [K8]; 1xTMT6plex [N-Term]; 1xPhospho [S4(100)]	1	PBANKA_0213200		conserved Plasmodium protein, unknown function	0	0.1	0.57	0.58	0.39	0.17							25
	Annotated Sequence	# Proteins	Master Protein Accessions			Protein Accessions	# Missed Cleavages	Ions Score	ptmRS: Best Site Probabilities
	sLGsALSk	1	PBANKA_0213200		conserved Plasmodium protein, unknown function	PBANKA_0213200.1-p1	0	25	S4(Phospho): 100
YEENASPR	1xTMT6plex [N-Term]; 1xPhospho [S6(100)]	1	PBANKA_0213200		conserved Plasmodium protein, unknown function	0											No Quan Values	20
	Annotated Sequence	# Proteins	Master Protein Accessions			Protein Accessions	# Missed Cleavages	Ions Score	ptmRS: Best Site Probabilities
	yEENAsPR	1	PBANKA_0213200		conserved Plasmodium protein, unknown function	PBANKA_0213200.1-p1	0	20	S6(Phospho): 100
QSGSNDIPK	1xTMT6plex [K9]; 1xTMT6plex [N-Term]; 1xPhospho [S4(99.8)]	1	PBANKA_0213200		conserved Plasmodium protein, unknown function	0	-0.09	0.19	0.17	0.26	0.37							27
	Annotated Sequence	# Proteins	Master Protein Accessions			Protein Accessions	# Missed Cleavages	Ions Score	ptmRS: Best Site Probabilities
	qSGsNDIPk	1	PBANKA_0213200		conserved Plasmodium protein, unknown function	PBANKA_0213200.1-p1	0	27	S4(Phospho): 99.76
TGSLNTQISSEKK	2xTMT6plex [K12; K13]; 1xTMT6plex [N-Term]; 1xPhospho [S3(100)]	1	PBANKA_0213200		conserved Plasmodium protein, unknown function	1	-0.14	-0.31	-0.26	-0.2	-0.14							13
	Annotated Sequence	# Proteins	Master Protein Accessions			Protein Accessions	# Missed Cleavages	Ions Score	ptmRS: Best Site Probabilities
	tGsLNTQISSEkk	1	PBANKA_0213200		conserved Plasmodium protein, unknown function	PBANKA_0213200.1-p1	1	13	S3(Phospho): 100
KDSCTDSIYSSIGK	1xCarbamidomethyl [C4]; 2xTMT6plex [K1; K14]; 1xTMT6plex [N-Term]; 1xPhospho [S3(100)]	1	PBANKA_0213200		conserved Plasmodium protein, unknown function	1	-0.21	-0.35	-0.17	-0.23	-0.2							39
	Annotated Sequence	# Proteins	Master Protein Accessions			Protein Accessions	# Missed Cleavages	Ions Score	ptmRS: Best Site Probabilities
	kDscTDSIYSSIGk	1	PBANKA_0213200		conserved Plasmodium protein, unknown function	PBANKA_0213200.1-p1	1	39	S3(Phospho): 100
LIGSNETFQVK	1xTMT6plex [K11]; 1xTMT6plex [N-Term]; 1xPhospho [S4(100)]	4	PBANKA_0213200		conserved Plasmodium protein, unknown function	0	0.05	0.1	0.37	0.05	0.08	1	1	1	1	1		61
	Annotated Sequence	# Proteins	Master Protein Accessions			Protein Accessions	# Missed Cleavages	Ions Score	ptmRS: Best Site Probabilities
	lIGsNETFQVk	1	PBANKA_0213200		conserved Plasmodium protein, unknown function	PBANKA_0213200.1-p1	0	61	S4(Phospho): 100
	lIGsNETFQVk	1	PBANKA_0213200		conserved Plasmodium protein, unknown function	PBANKA_0213200.1-p1	0	59	S4(Phospho): 100
	lIGsNETFQVk	1	PBANKA_0213200		conserved Plasmodium protein, unknown function	PBANKA_0213200.1-p1	0	21	S4(Phospho): 100
	lIGsNETFQVk	1	PBANKA_0213200		conserved Plasmodium protein, unknown function	PBANKA_0213200.1-p1	0	21	S4(Phospho): 100
KGFIDFVTAVANSNDYENR	1xTMT6plex [K1]; 1xTMT6plex [N-Term]; 1xPhospho [S13(100)]	2	PBANKA_0214000		dynein heavy chain, putative	1	0.19	0.33	0.38	0.37	0.26	1	1	1	1	1		67
	Annotated Sequence	# Proteins	Master Protein Accessions			Protein Accessions	# Missed Cleavages	Ions Score	ptmRS: Best Site Probabilities
	kGFIDFVTAVANsNDYENR	1	PBANKA_0214000		dynein heavy chain, putative	PBANKA_0214000.1-p1	1	67	S13(Phospho): 100
	kGFIDFVTAVANsNDYENR	1	PBANKA_0214000		dynein heavy chain, putative	PBANKA_0214000.1-p1	1	50	S13(Phospho): 100
RNSQVFYDK	1xTMT6plex [K9]; 1xTMT6plex [N-Term]; 1xPhospho [S3(100)]	3	PBANKA_0214000		dynein heavy chain, putative	1	-0.09	-0.28	-0.3	-0.08	-0.2	1	1	1	1	1		29
	Annotated Sequence	# Proteins	Master Protein Accessions			Protein Accessions	# Missed Cleavages	Ions Score	ptmRS: Best Site Probabilities
	rNsQVFYDk	1	PBANKA_0214000		dynein heavy chain, putative	PBANKA_0214000.1-p1	1	29	S3(Phospho): 100
	rNsQVFYDk	1	PBANKA_0214000		dynein heavy chain, putative	PBANKA_0214000.1-p1	1	24	S3(Phospho): 100
	rNsQVFYDk	1	PBANKA_0214000		dynein heavy chain, putative	PBANKA_0214000.1-p1	1	19	S3(Phospho): 100
NSQVFYDKSEENIDVCK	1xCarbamidomethyl [C16]; 2xTMT6plex [K8; K17]; 1xTMT6plex [N-Term]; 1xPhospho [S2(100)]	1	PBANKA_0214000		dynein heavy chain, putative	1	-0.36	-0.18	-0.36	-0.36	0.16							27
	Annotated Sequence	# Proteins	Master Protein Accessions			Protein Accessions	# Missed Cleavages	Ions Score	ptmRS: Best Site Probabilities
	nsQVFYDkSEENIDVck	1	PBANKA_0214000		dynein heavy chain, putative	PBANKA_0214000.1-p1	1	27	S2(Phospho): 100
EINNATTGSIPATNNMIPHNSIVMNENIMR	1xTMT6plex [N-Term]; 1xPhospho [S21(100)]	2	PBANKA_0214000		dynein heavy chain, putative	0	0	-0.03	0.1	-0.07	-0.16	1	1	1	1	1		50
	Annotated Sequence	# Proteins	Master Protein Accessions			Protein Accessions	# Missed Cleavages	Ions Score	ptmRS: Best Site Probabilities
	eINNATTGSIPATNNMIPHNsIVMNENIMR	1	PBANKA_0214000		dynein heavy chain, putative	PBANKA_0214000.1-p1	0	50	S21(Phospho): 100
	eINNATTGSIPATNNMIPHNsIVMNENIMR	1	PBANKA_0214000		dynein heavy chain, putative	PBANKA_0214000.1-p1	0	29	S21(Phospho): 100
LVNSSNLLNTNR	1xTMT6plex [N-Term]; 1xPhospho [S4(100)]	6	PBANKA_0214000		dynein heavy chain, putative	0	0.25	0.47	0.49	0.34	0.4	1	0.10641	0.0639734	0.600282	0.302044		65
	Annotated Sequence	# Proteins	Master Protein Accessions			Protein Accessions	# Missed Cleavages	Ions Score	ptmRS: Best Site Probabilities
	lVNsSNLLNTNR	1	PBANKA_0214000		dynein heavy chain, putative	PBANKA_0214000.1-p1	0	65	S4(Phospho): 99.74
	lVNsSNLLNTNR	1	PBANKA_0214000		dynein heavy chain, putative	PBANKA_0214000.1-p1	0	58	S4(Phospho): 99.73
	lVNsSNLLNTNR	1	PBANKA_0214000		dynein heavy chain, putative	PBANKA_0214000.1-p1	0	54	S4(Phospho): 100
	lVNsSNLLNTNR	1	PBANKA_0214000		dynein heavy chain, putative	PBANKA_0214000.1-p1	0	46	S4(Phospho): 100
	lVNSsNLLNTNR	1	PBANKA_0214000		dynein heavy chain, putative	PBANKA_0214000.1-p1	0	21	S4(Phospho): 50; S5(Phospho): 50
	lVNSsNLLNTNR	1	PBANKA_0214000		dynein heavy chain, putative	PBANKA_0214000.1-p1	0	15	S5(Phospho): 100
KNSSVTHLNSVEESEGVVEGVGVNQENPISQCLK	1xCarbamidomethyl [C32]; 2xPhospho [S3(98.9); S10(100)]; 2xTMT6plex [K1; K34]; 1xTMT6plex [N-Term]	1	PBANKA_0214000		dynein heavy chain, putative	1	0.09	0.65	0.51	0.45	0.47							57
	Annotated Sequence	# Proteins	Master Protein Accessions			Protein Accessions	# Missed Cleavages	Ions Score	ptmRS: Best Site Probabilities
	kNSSVtHLNSVEEsEGVVEGVGVNQENPISQcLk	1	PBANKA_0214000		dynein heavy chain, putative	PBANKA_0214000.1-p1	1	57	S3(Phospho): 98.93; S10(Phospho): 100
KNSSVTHLNSVEESEGVVEGVGVNQENPISQCLK	1xCarbamidomethyl [C32]; 2xTMT6plex [K1; K34]; 1xTMT6plex [N-Term]; 1xPhospho [S3(99)]	4	PBANKA_0214000		dynein heavy chain, putative	1	-0.37	-0.44	-0.68	-0.41	-0.35	1	1	1	1	1		53
	Annotated Sequence	# Proteins	Master Protein Accessions			Protein Accessions	# Missed Cleavages	Ions Score	ptmRS: Best Site Probabilities
	kNSSVtHLNSVEESEGVVEGVGVNQENPISQcLk	1	PBANKA_0214000		dynein heavy chain, putative	PBANKA_0214000.1-p1	1	53	S3(Phospho): 98.99
	kNSSVtHLNSVEESEGVVEGVGVNQENPISQcLk	1	PBANKA_0214000		dynein heavy chain, putative	PBANKA_0214000.1-p1	1	41	S3(Phospho): 98.27
	kNSSVTHLNsVEESEGVVEGVGVNQENPISQcLk	1	PBANKA_0214000		dynein heavy chain, putative	PBANKA_0214000.1-p1	1	19	S3(Phospho): 33.33; S4(Phospho): 33.33; T6(Phospho): 33.33
	kNSSVTHLNSVEEsEGVVEGVGVNQENPISQcLk	1	PBANKA_0214000		dynein heavy chain, putative	PBANKA_0214000.1-p1	1	14	S3(Phospho): 33.33; S4(Phospho): 33.33; T6(Phospho): 33.33
GFIDFVTAVANSNDYENR	1xTMT6plex [N-Term]; 1xPhospho [S12(100)]	2	PBANKA_0214000		dynein heavy chain, putative	0	-0.37	-0.11	0.22	-0.12	-0.3	1	1	1	1	1		70
	Annotated Sequence	# Proteins	Master Protein Accessions			Protein Accessions	# Missed Cleavages	Ions Score	ptmRS: Best Site Probabilities
	gFIDFVTAVANsNDYENR	1	PBANKA_0214000		dynein heavy chain, putative	PBANKA_0214000.1-p1	0	70	S12(Phospho): 100
	gFIDFVTAVANsNDYENR	1	PBANKA_0214000		dynein heavy chain, putative	PBANKA_0214000.1-p1	0	62	S12(Phospho): 100
IHLTKSQTELTK	2xTMT6plex [K5; K12]; 1xTMT6plex [N-Term]; 1xPhospho [S6(99.8)]	1	PBANKA_0214600		Plasmodium exported protein, unknown function	1	-0.2	-0.3	-0.08	0.06	-0.09							32
	Annotated Sequence	# Proteins	Master Protein Accessions			Protein Accessions	# Missed Cleavages	Ions Score	ptmRS: Best Site Probabilities
	iHLTksQTELTk	1	PBANKA_0214600		Plasmodium exported protein, unknown function	PBANKA_0214600.1-p1	1	32	S6(Phospho): 99.78
HLSGNAPENLK	1xTMT6plex [K11]; 1xTMT6plex [N-Term]; 1xPhospho [S3(100)]	2	PBANKA_0214600		Plasmodium exported protein, unknown function	0	-0.08	-0.13	-0.27	-0.14	-0.08	1	1	0.116376	1	1		45
	Annotated Sequence	# Proteins	Master Protein Accessions			Protein Accessions	# Missed Cleavages	Ions Score	ptmRS: Best Site Probabilities
	hLsGNAPENLk	1	PBANKA_0214600		Plasmodium exported protein, unknown function	PBANKA_0214600.1-p1	0	45	S3(Phospho): 100
	hLsGNAPENLk	1	PBANKA_0214600		Plasmodium exported protein, unknown function	PBANKA_0214600.1-p1	0	37	S3(Phospho): 100
ELIKTPSNSDLTK	2xTMT6plex [K4; K13]; 1xTMT6plex [N-Term]; 1xPhospho [T/S]	1	PBANKA_0214600		Plasmodium exported protein, unknown function	1	-0.2	-0.13	-0.4	-0.29	0							15
	Annotated Sequence	# Proteins	Master Protein Accessions			Protein Accessions	# Missed Cleavages	Ions Score	ptmRS: Best Site Probabilities
	eLIkTPsNSDLTk	1	PBANKA_0214600		Plasmodium exported protein, unknown function	PBANKA_0214600.1-p1	1	15	T5(Phospho): 50; S7(Phospho): 50
TGPSMPNLPFPIPSEDELKQMLK	2xTMT6plex [K19; K23]; 1xTMT6plex [N-Term]; 1xPhospho [S14(100)]	1	PBANKA_0300600		Plasmodium exported protein, unknown function	1	-0.3	-0.47	-0.58	-0.2	-0.28							21
	Annotated Sequence	# Proteins	Master Protein Accessions			Protein Accessions	# Missed Cleavages	Ions Score	ptmRS: Best Site Probabilities
	tGPSMPNLPFPIPsEDELkQMLk	1	PBANKA_0300600		Plasmodium exported protein, unknown function	PBANKA_0300600.1-p1	1	21	S14(Phospho): 100
TGPSMPNLPFPIPSEDELK	1xTMT6plex [K19]; 1xTMT6plex [N-Term]; 1xPhospho [S4(100)]	1	PBANKA_0300600		Plasmodium exported protein, unknown function	0	-0.58	0.08	0.27	0.11	-0.1							24
	Annotated Sequence	# Proteins	Master Protein Accessions			Protein Accessions	# Missed Cleavages	Ions Score	ptmRS: Best Site Probabilities
	tGPsMPNLPFPIPSEDELk	1	PBANKA_0300600		Plasmodium exported protein, unknown function	PBANKA_0300600.1-p1	0	24	S4(Phospho): 100
KGSKPSIPNLPFPIPPIPGMPMPSEDELK	2xOxidation [M20; M22]; 3xTMT6plex [K1; K4; K29]; 1xTMT6plex [N-Term]; 1xPhospho [S3(100)]	1	PBANKA_0300600		Plasmodium exported protein, unknown function	1	-0.11	-0.43	-0.16	-0.3	-0.35							17
	Annotated Sequence	# Proteins	Master Protein Accessions			Protein Accessions	# Missed Cleavages	Ions Score	ptmRS: Best Site Probabilities
	kGSkPsIPNLPFPIPPIPGmPmPSEDELk	1	PBANKA_0300600		Plasmodium exported protein, unknown function	PBANKA_0300600.1-p1	1	17	S3(Phospho): 99.99
KGSKPSIPNLPFPIPPIPGMPMPSEDELK	3xTMT6plex [K1; K4; K29]; 1xTMT6plex [N-Term]; 1xPhospho [S3(99.1)]	2	PBANKA_0300600		Plasmodium exported protein, unknown function	1	-0.19	-0.74	-0.75	-0.37	-0.7	1	0.712604	0.509499	1	1		40
	Annotated Sequence	# Proteins	Master Protein Accessions			Protein Accessions	# Missed Cleavages	Ions Score	ptmRS: Best Site Probabilities
	kGSkPsIPNLPFPIPPIPGMPMPSEDELk	1	PBANKA_0300600		Plasmodium exported protein, unknown function	PBANKA_0300600.1-p1	1	40	S3(Phospho): 99.06
	kGSkPsIPNLPFPIPPIPGMPMPSEDELk	1	PBANKA_0300600		Plasmodium exported protein, unknown function	PBANKA_0300600.1-p1	1	31	S3(Phospho): 99.09
MFGQAMPQENPGSSR	1xTMT6plex [N-Term]; 1xPhospho [S]	3	PBANKA_0300600		Plasmodium exported protein, unknown function	0	-0.01	-0.12	-0.08	0	0.02	1	1	1	1	1		37
	Annotated Sequence	# Proteins	Master Protein Accessions			Protein Accessions	# Missed Cleavages	Ions Score	ptmRS: Best Site Probabilities
	mFGQAMPQENPGSsR	1	PBANKA_0300600		Plasmodium exported protein, unknown function	PBANKA_0300600.1-p1	0	37	S13(Phospho): 50; S14(Phospho): 50
	mFGQAMPQENPGSsR	1	PBANKA_0300600		Plasmodium exported protein, unknown function	PBANKA_0300600.1-p1	0	23	S13(Phospho): 50; S14(Phospho): 50
	mFGQAMPQENPGSsR	1	PBANKA_0300600		Plasmodium exported protein, unknown function	PBANKA_0300600.1-p1	0	16	S13(Phospho): 50; S14(Phospho): 50
MFGQAMPQENPGSSRR	1xTMT6plex [N-Term]; 1xPhospho [S]	2	PBANKA_0300600		Plasmodium exported protein, unknown function	1	-0.23	0.25	-0.19	-0.18	0.2							24
	Annotated Sequence	# Proteins	Master Protein Accessions			Protein Accessions	# Missed Cleavages	Ions Score	ptmRS: Best Site Probabilities
	mFGQAMPQENPGSsRR	1	PBANKA_0300600		Plasmodium exported protein, unknown function	PBANKA_0300600.1-p1	1	24	S13(Phospho): 50; S14(Phospho): 50
	mFGQAMPQENPGSsRR	1	PBANKA_0300600		Plasmodium exported protein, unknown function	PBANKA_0300600.1-p1	1	20	S13(Phospho): 50; S14(Phospho): 50
VNQPPGGASSIIFG	1xTMT6plex [N-Term]; 1xPhospho [S10(99.6)]	2	PBANKA_0301300		conserved Plasmodium protein, unknown function	0	-0.38	-0.27	-0.05	-0.14	-0.3	1	1	1	1	1		72
	Annotated Sequence	# Proteins	Master Protein Accessions			Protein Accessions	# Missed Cleavages	Ions Score	ptmRS: Best Site Probabilities
	vNQPPGGASsIIFG	1	PBANKA_0301300		conserved Plasmodium protein, unknown function	PBANKA_0301300.1-p1	0	72	S10(Phospho): 99.64
	vNQPPGGASsIIFG	1	PBANKA_0301300		conserved Plasmodium protein, unknown function	PBANKA_0301300.1-p1	0	33	S10(Phospho): 99.49
VTNAPGGNSSLSFGNYISEENER	1xTMT6plex [N-Term]; 1xPhospho [S10(99.5)]	10	PBANKA_0301300		conserved Plasmodium protein, unknown function	0	-0.31	-0.19	-0.21	-0.22	-0.4	1	1	1	1	1		88
	Annotated Sequence	# Proteins	Master Protein Accessions			Protein Accessions	# Missed Cleavages	Ions Score	ptmRS: Best Site Probabilities
	vTNAPGGNSsLSFGNYISEENER	1	PBANKA_0301300		conserved Plasmodium protein, unknown function	PBANKA_0301300.1-p1	0	88	S9(Phospho): 100
	vTNAPGGNSsLSFGNYISEENER	1	PBANKA_0301300		conserved Plasmodium protein, unknown function	PBANKA_0301300.1-p1	0	84	S10(Phospho): 99.4
	vTNAPGGNsSLSFGNYISEENER	1	PBANKA_0301300		conserved Plasmodium protein, unknown function	PBANKA_0301300.1-p1	0	84	S12(Phospho): 98.9
	vTNAPGGNSsLSFGNYISEENER	1	PBANKA_0301300		conserved Plasmodium protein, unknown function	PBANKA_0301300.1-p1	0	72	S10(Phospho): 99.5
	vTNAPGGNSsLSFGNYISEENER	1	PBANKA_0301300		conserved Plasmodium protein, unknown function	PBANKA_0301300.1-p1	0	72	S9(Phospho): 100
	vTNAPGGNSsLSFGNYISEENER	1	PBANKA_0301300		conserved Plasmodium protein, unknown function	PBANKA_0301300.1-p1	0	71	S10(Phospho): 99.5
	vTNAPGGNSSLsFGNYISEENER	1	PBANKA_0301300		conserved Plasmodium protein, unknown function	PBANKA_0301300.1-p1	0	29	S9(Phospho): 33.25; S10(Phospho): 33.25; S12(Phospho): 33.25
	vTNAPGGNSSLsFGNYISEENER	1	PBANKA_0301300		conserved Plasmodium protein, unknown function	PBANKA_0301300.1-p1	0	21	S9(Phospho): 33.26; S10(Phospho): 33.26; S12(Phospho): 33.26
	vTNAPGGNsSLSFGNYISEENER	1	PBANKA_0301300		conserved Plasmodium protein, unknown function	PBANKA_0301300.1-p1	0	20	S9(Phospho): 97.83
	vTNAPGGNSSLsFGNYISEENER	1	PBANKA_0301300		conserved Plasmodium protein, unknown function	PBANKA_0301300.1-p1	0	19	S9(Phospho): 24.96; S10(Phospho): 24.96; S12(Phospho): 24.96; Y16(Phospho): 24.96
SSTRVTNAPGGNSSLSFGNYISEENER	1xPhospho [S/T/Y]; 1xTMT6plex [N-Term]	2	PBANKA_0301300		conserved Plasmodium protein, unknown function	1	-0.44	-0.12	-0.14	-0.16	-0.15	1	1	1	1	1		30
	Annotated Sequence	# Proteins	Master Protein Accessions			Protein Accessions	# Missed Cleavages	Ions Score	ptmRS: Best Site Probabilities
	sSTRVtNAPGGNSSLSFGNYISEENER	1	PBANKA_0301300		conserved Plasmodium protein, unknown function	PBANKA_0301300.1-p1	1	30	S2(Phospho): 49.62; T3(Phospho): 49.62
	sStRVTNAPGGNSSLSFGNYISEENER	1	PBANKA_0301300		conserved Plasmodium protein, unknown function	PBANKA_0301300.1-p1	1	20	S2(Phospho): 49.57; T3(Phospho): 49.57
VTNAPGGNSSLSFGNYISEENER	1xTMT6plex [N-Term]; 2xPhospho [S9(99.3); S12(99.3)]	1	PBANKA_0301300		conserved Plasmodium protein, unknown function	0	-0.02	-0.35	-0.01	-0.2	-0.12							45
	Annotated Sequence	# Proteins	Master Protein Accessions			Protein Accessions	# Missed Cleavages	Ions Score	ptmRS: Best Site Probabilities
	vTNAPGGNsSLsFGNYISEENER	1	PBANKA_0301300		conserved Plasmodium protein, unknown function	PBANKA_0301300.1-p1	0	45	S9(Phospho): 99.31; S12(Phospho): 99.31
TDSNTSLVFSFEDKIQDR	1xTMT6plex [K14]; 1xTMT6plex [N-Term]; 2xPhospho [S3(99.3); S6(99.3)]	1	PBANKA_0301800		condensin-2 complex subunit H2, putative	1	-0.02	0.36	0.15	0.12	0.02							22
	Annotated Sequence	# Proteins	Master Protein Accessions			Protein Accessions	# Missed Cleavages	Ions Score	ptmRS: Best Site Probabilities
	tDsNTsLVFSFEDkIQDR	1	PBANKA_0301800		condensin-2 complex subunit H2, putative	PBANKA_0301800.1-p1	1	22	S3(Phospho): 99.31; S6(Phospho): 99.31
KTDSNTSLVFSFEDK	2xTMT6plex [K1; K15]; 1xTMT6plex [N-Term]; 1xPhospho [S4(100)]	3	PBANKA_0301800		condensin-2 complex subunit H2, putative	1	-0.04	-0.64	-0.65	-0.29	-0.31	1	1	1	1	1		29
	Annotated Sequence	# Proteins	Master Protein Accessions			Protein Accessions	# Missed Cleavages	Ions Score	ptmRS: Best Site Probabilities
	kTDsNTSLVFSFEDk	1	PBANKA_0301800		condensin-2 complex subunit H2, putative	PBANKA_0301800.1-p1	1	29	S4(Phospho): 100
	kTDSNTsLVFSFEDk	1	PBANKA_0301800		condensin-2 complex subunit H2, putative	PBANKA_0301800.1-p1	1	24	S4(Phospho): 99.02
	kTDsNTSLVFSFEDk	1	PBANKA_0301800		condensin-2 complex subunit H2, putative	PBANKA_0301800.1-p1	1	23	S4(Phospho): 99.65
KTDSNTSLVFSFEDK	2xTMT6plex [K1; K15]; 1xTMT6plex [N-Term]; 2xPhospho [S4(100); S7(100)]	3	PBANKA_0301800		condensin-2 complex subunit H2, putative	1	0.07	0.1	0.09	0.07	-0.19	1	1	1	1	1		45
	Annotated Sequence	# Proteins	Master Protein Accessions			Protein Accessions	# Missed Cleavages	Ions Score	ptmRS: Best Site Probabilities
	kTDSNtsLVFSFEDk	1	PBANKA_0301800		condensin-2 complex subunit H2, putative	PBANKA_0301800.1-p1	1	45	S4(Phospho): 100; T6(Phospho): 50; S7(Phospho): 50
	kTDsNTsLVFSFEDk	1	PBANKA_0301800		condensin-2 complex subunit H2, putative	PBANKA_0301800.1-p1	1	36	S4(Phospho): 100; S7(Phospho): 100
	kTDSNtsLVFSFEDk	1	PBANKA_0301800		condensin-2 complex subunit H2, putative	PBANKA_0301800.1-p1	1	30	S4(Phospho): 99.49; T6(Phospho): 99.49
TDSNTSLVFSFEDK	1xTMT6plex [K14]; 1xTMT6plex [N-Term]; 2xPhospho [T/S]	3	PBANKA_0301800		condensin-2 complex subunit H2, putative	0	-0.1	0.45	0.29	-0.02	0.2	1	1	1	1	1		30
	Annotated Sequence	# Proteins	Master Protein Accessions			Protein Accessions	# Missed Cleavages	Ions Score	ptmRS: Best Site Probabilities
	tDSNtsLVFSFEDk	1	PBANKA_0301800		condensin-2 complex subunit H2, putative	PBANKA_0301800.1-p1	0	30	S3(Phospho): 99.48; T5(Phospho): 50; S6(Phospho): 50
	tDsNTsLVFSFEDk	1	PBANKA_0301800		condensin-2 complex subunit H2, putative	PBANKA_0301800.1-p1	0	20	S3(Phospho): 99.99; T5(Phospho): 49.84; S6(Phospho): 49.84
	tDSNtsLVFSFEDk	1	PBANKA_0301800		condensin-2 complex subunit H2, putative	PBANKA_0301800.1-p1	0	19	T1(Phospho): 50; S3(Phospho): 50; T5(Phospho): 74.72; S6(Phospho): 25.28
TDSNTSLVFSFEDK	1xTMT6plex [K14]; 1xTMT6plex [N-Term]; 1xPhospho [S3(100)]	2	PBANKA_0301800		condensin-2 complex subunit H2, putative	0	-0.05	-0.83	-0.83	-0.62	-0.63	1	0.243265	0.175948	1	1		27
	Annotated Sequence	# Proteins	Master Protein Accessions			Protein Accessions	# Missed Cleavages	Ions Score	ptmRS: Best Site Probabilities
	tDsNTSLVFSFEDk	1	PBANKA_0301800		condensin-2 complex subunit H2, putative	PBANKA_0301800.1-p1	0	27	S3(Phospho): 100
	tDSNTsLVFSFEDk	1	PBANKA_0301800		condensin-2 complex subunit H2, putative	PBANKA_0301800.1-p1	0	23	S3(Phospho): 100
LLNEPDIENIPYIDTLGNESINSIETK	1xTMT6plex [K27]; 1xTMT6plex [N-Term]; 1xPhospho [S23(99.2)]	1	PBANKA_0301800		condensin-2 complex subunit H2, putative	0	0.01	-0.26	0.04	-0.04	-0.07							44
	Annotated Sequence	# Proteins	Master Protein Accessions			Protein Accessions	# Missed Cleavages	Ions Score	ptmRS: Best Site Probabilities
	lLNEPDIENIPYIDTLGNESINsIETk	1	PBANKA_0301800		condensin-2 complex subunit H2, putative	PBANKA_0301800.1-p1	0	44	S23(Phospho): 99.21
TIQETLNMDTFINIKSIDNHVK	2xTMT6plex [K15; K22]; 1xTMT6plex [N-Term]; 1xPhospho [S16(100)]	3	PBANKA_0301800		condensin-2 complex subunit H2, putative	1	0.12	0.14	0.24	0.15	0.18	1	1	1	1	1		51
	Annotated Sequence	# Proteins	Master Protein Accessions			Protein Accessions	# Missed Cleavages	Ions Score	ptmRS: Best Site Probabilities
	tIQETLNMDTFINIksIDNHVk	1	PBANKA_0301800		condensin-2 complex subunit H2, putative	PBANKA_0301800.1-p1	1	51	S16(Phospho): 100
	tIQETLNMDTFINIksIDNHVk	1	PBANKA_0301800		condensin-2 complex subunit H2, putative	PBANKA_0301800.1-p1	1	46	S16(Phospho): 100
	tIQETLNMDtFINIkSIDNHVk	1	PBANKA_0301800		condensin-2 complex subunit H2, putative	PBANKA_0301800.1-p1	1	24	S16(Phospho): 100
SIDNHVK	1xTMT6plex [K7]; 1xTMT6plex [N-Term]; 1xPhospho [S1(100)]	1	PBANKA_0301800		condensin-2 complex subunit H2, putative	0	0.17	0.04	0.18	0.43	-0.16							19
	Annotated Sequence	# Proteins	Master Protein Accessions			Protein Accessions	# Missed Cleavages	Ions Score	ptmRS: Best Site Probabilities
	sIDNHVk	1	PBANKA_0301800		condensin-2 complex subunit H2, putative	PBANKA_0301800.1-p1	0	19	S1(Phospho): 100
IMDLNSTNSYK	1xTMT6plex [K11]; 1xTMT6plex [N-Term]; 1xPhospho [S9(99)]	1	PBANKA_0301800		condensin-2 complex subunit H2, putative	0	0.18	0.26	0.24	-0.02	0.05							44
	Annotated Sequence	# Proteins	Master Protein Accessions			Protein Accessions	# Missed Cleavages	Ions Score	ptmRS: Best Site Probabilities
	iMDLNSTNsYk	1	PBANKA_0301800		condensin-2 complex subunit H2, putative	PBANKA_0301800.1-p1	0	44	S9(Phospho): 99.04
TIQETLNMDTFINIKSIDNHVK	1xOxidation [M8]; 2xTMT6plex [K15; K22]; 1xTMT6plex [N-Term]; 1xPhospho [S16(100)]	2	PBANKA_0301800		condensin-2 complex subunit H2, putative	1	-0.03	-0.02	0.15	0.14	-0.13	1	1	1	1	1		51
	Annotated Sequence	# Proteins	Master Protein Accessions			Protein Accessions	# Missed Cleavages	Ions Score	ptmRS: Best Site Probabilities
	tIQETLNmDTFINIksIDNHVk	1	PBANKA_0301800		condensin-2 complex subunit H2, putative	PBANKA_0301800.1-p1	1	51	S16(Phospho): 100
	tIQETLNmDTFINIksIDNHVk	1	PBANKA_0301800		condensin-2 complex subunit H2, putative	PBANKA_0301800.1-p1	1	23	S16(Phospho): 100
INKNNSDYFNLDSK	2xTMT6plex [K3; K14]; 1xTMT6plex [N-Term]; 1xPhospho [S6(100)]	2	PBANKA_0301900		Sel1 repeat-containing protein, putative	1	0.23	0.49	0.58	0.52	0.57	1	0.508061	0.177968	0.5082	0.313795		43
	Annotated Sequence	# Proteins	Master Protein Accessions			Protein Accessions	# Missed Cleavages	Ions Score	ptmRS: Best Site Probabilities
	iNkNNsDYFNLDSk	1	PBANKA_0301900		Sel1 repeat-containing protein, putative	PBANKA_0301900.1-p1	1	43	S6(Phospho): 100
	iNkNNsDYFNLDSk	1	PBANKA_0301900		Sel1 repeat-containing protein, putative	PBANKA_0301900.1-p1	1	37	S6(Phospho): 100
YKSNNYEGFENNDIYGGIELNR	1xTMT6plex [K2]; 1xTMT6plex [N-Term]; 1xPhospho [S3(100)]	2	PBANKA_0301900		Sel1 repeat-containing protein, putative	1	-0.08	0.11	0.04	0.01	0.16	1	1	1	1	1		35
	Annotated Sequence	# Proteins	Master Protein Accessions			Protein Accessions	# Missed Cleavages	Ions Score	ptmRS: Best Site Probabilities
	yksNNYEGFENNDIYGGIELNR	1	PBANKA_0301900		Sel1 repeat-containing protein, putative	PBANKA_0301900.1-p1	1	35	S3(Phospho): 100
	yksNNYEGFENNDIYGGIELNR	1	PBANKA_0301900		Sel1 repeat-containing protein, putative	PBANKA_0301900.1-p1	1	23	S3(Phospho): 100
MDILSRGGTQEIEHR	1xOxidation [M1]; 1xTMT6plex [N-Term]; 2xPhospho [S5(100); T9(100)]	14	PBANKA_0302500	HT	hexose transporter	1	-0.01	0.19	0.11	0.06	-0.02	1	1	1	1	1		27
	Annotated Sequence	# Proteins	Master Protein Accessions			Protein Accessions	# Missed Cleavages	Ions Score	ptmRS: Best Site Probabilities
	mDILsRGGtQEIEHR	1	PBANKA_0302500	HT	hexose transporter	PBANKA_0302500.1-p1	1	27	S5(Phospho): 100; T9(Phospho): 100
	mDILsRGGtQEIEHR	1	PBANKA_0302500	HT	hexose transporter	PBANKA_0302500.1-p1	1	24	S5(Phospho): 100; T9(Phospho): 100
	mDILsRGGtQEIEHR	1	PBANKA_0302500	HT	hexose transporter	PBANKA_0302500.1-p1	1	24	S5(Phospho): 100; T9(Phospho): 100
	mDILsRGGtQEIEHR	1	PBANKA_0302500	HT	hexose transporter	PBANKA_0302500.1-p1	1	23	S5(Phospho): 100; T9(Phospho): 100
	mDILsRGGtQEIEHR	1	PBANKA_0302500	HT	hexose transporter	PBANKA_0302500.1-p1	1	21	S5(Phospho): 100; T9(Phospho): 100
	mDILsRGGtQEIEHR	1	PBANKA_0302500	HT	hexose transporter	PBANKA_0302500.1-p1	1	20	S5(Phospho): 100; T9(Phospho): 100
	mDILsRGGtQEIEHR	1	PBANKA_0302500	HT	hexose transporter	PBANKA_0302500.1-p1	1	17	S5(Phospho): 100; T9(Phospho): 100
	mDILsRGGtQEIEHR	1	PBANKA_0302500	HT	hexose transporter	PBANKA_0302500.1-p1	1	16	S5(Phospho): 100; T9(Phospho): 100
	mDILsRGGtQEIEHR	1	PBANKA_0302500	HT	hexose transporter	PBANKA_0302500.1-p1	1	16	S5(Phospho): 100; T9(Phospho): 100
	mDILsRGGtQEIEHR	1	PBANKA_0302500	HT	hexose transporter	PBANKA_0302500.1-p1	1	14	S5(Phospho): 100; T9(Phospho): 100
	mDILsRGGtQEIEHR	1	PBANKA_0302500	HT	hexose transporter	PBANKA_0302500.1-p1	1	14	S5(Phospho): 100; T9(Phospho): 100
	mDILsRGGtQEIEHR	1	PBANKA_0302500	HT	hexose transporter	PBANKA_0302500.1-p1	1	14	S5(Phospho): 100; T9(Phospho): 100
	mDILsRGGtQEIEHR	1	PBANKA_0302500	HT	hexose transporter	PBANKA_0302500.1-p1	1	14	S5(Phospho): 100; T9(Phospho): 100
	mDILsRGGtQEIEHR	1	PBANKA_0302500	HT	hexose transporter	PBANKA_0302500.1-p1	1	14	S5(Phospho): 100; T9(Phospho): 100
MDILSRGGTQEIEHR	1xOxidation [M1]; 1xTMT6plex [N-Term]; 1xPhospho [S5(100)]	1	PBANKA_0302500	HT	hexose transporter	1	-0.39	-0.07	-0.22	0.35	-0.1							25
	Annotated Sequence	# Proteins	Master Protein Accessions			Protein Accessions	# Missed Cleavages	Ions Score	ptmRS: Best Site Probabilities
	mDILsRGGTQEIEHR	1	PBANKA_0302500	HT	hexose transporter	PBANKA_0302500.1-p1	1	25	S5(Phospho): 99.99
GGTQEIEHRDGFFNK	1xTMT6plex [K15]; 1xTMT6plex [N-Term]; 1xPhospho [T3(100)]	5	PBANKA_0302500	HT	hexose transporter	1	-0.03	-0.04	-0.12	-0.02	-0.07	1	1	1	1	1		28
	Annotated Sequence	# Proteins	Master Protein Accessions			Protein Accessions	# Missed Cleavages	Ions Score	ptmRS: Best Site Probabilities
	gGtQEIEHRDGFFNk	1	PBANKA_0302500	HT	hexose transporter	PBANKA_0302500.1-p1	1	28	T3(Phospho): 100
	gGtQEIEHRDGFFNk	1	PBANKA_0302500	HT	hexose transporter	PBANKA_0302500.1-p1	1	24	T3(Phospho): 100
	gGtQEIEHRDGFFNk	1	PBANKA_0302500	HT	hexose transporter	PBANKA_0302500.1-p1	1	17	T3(Phospho): 100
	gGtQEIEHRDGFFNk	1	PBANKA_0302500	HT	hexose transporter	PBANKA_0302500.1-p1	1	15	T3(Phospho): 100
	gGtQEIEHRDGFFNk	1	PBANKA_0302500	HT	hexose transporter	PBANKA_0302500.1-p1	1	14	T3(Phospho): 100
MDILSRGGTQEIEHR	1xTMT6plex [N-Term]; 2xPhospho [S5(100); T9(100)]	3	PBANKA_0302500	HT	hexose transporter	1	-0.07	-0.09	0.07	-0.14	-0.09	1	1	1	1	1		38
	Annotated Sequence	# Proteins	Master Protein Accessions			Protein Accessions	# Missed Cleavages	Ions Score	ptmRS: Best Site Probabilities
	mDILsRGGtQEIEHR	1	PBANKA_0302500	HT	hexose transporter	PBANKA_0302500.1-p1	1	38	S5(Phospho): 100; T9(Phospho): 100
	mDILsRGGtQEIEHR	1	PBANKA_0302500	HT	hexose transporter	PBANKA_0302500.1-p1	1	16	S5(Phospho): 100; T9(Phospho): 100
	mDILsRGGtQEIEHR	1	PBANKA_0302500	HT	hexose transporter	PBANKA_0302500.1-p1	1	15	S5(Phospho): 100; T9(Phospho): 100
MDILSRGGTQEIEHR	1xTMT6plex [N-Term]; 1xPhospho [S/T]	5	PBANKA_0302500	HT	hexose transporter	1	-0.32	-0.45	-0.5	-0.41	-0.17	1	1	1	1	1		31
	Annotated Sequence	# Proteins	Master Protein Accessions			Protein Accessions	# Missed Cleavages	Ions Score	ptmRS: Best Site Probabilities
	mDILsRGGTQEIEHR	1	PBANKA_0302500	HT	hexose transporter	PBANKA_0302500.1-p1	1	31	S5(Phospho): 99.59
	mDILSRGGtQEIEHR	1	PBANKA_0302500	HT	hexose transporter	PBANKA_0302500.1-p1	1	20	S5(Phospho): 99.71
	mDILsRGGTQEIEHR	1	PBANKA_0302500	HT	hexose transporter	PBANKA_0302500.1-p1	1	20	S5(Phospho): 50; T9(Phospho): 50
	mDILsRGGTQEIEHR	1	PBANKA_0302500	HT	hexose transporter	PBANKA_0302500.1-p1	1	18	T9(Phospho): 99.56
	mDILsRGGTQEIEHR	1	PBANKA_0302500	HT	hexose transporter	PBANKA_0302500.1-p1	1	17	S5(Phospho): 99.46
GGTQEIEHR	1xTMT6plex [N-Term]; 1xPhospho [T3(100)]	8	PBANKA_0302500	HT	hexose transporter	0	0.14	-0.27	-0.4	-0.1	-0.26	1	1	0.253404	1	1		56
	Annotated Sequence	# Proteins	Master Protein Accessions			Protein Accessions	# Missed Cleavages	Ions Score	ptmRS: Best Site Probabilities
	gGtQEIEHR	1	PBANKA_0302500	HT	hexose transporter	PBANKA_0302500.1-p1	0	56	T3(Phospho): 100
	gGtQEIEHR	1	PBANKA_0302500	HT	hexose transporter	PBANKA_0302500.1-p1	0	53	T3(Phospho): 100
	gGtQEIEHR	1	PBANKA_0302500	HT	hexose transporter	PBANKA_0302500.1-p1	0	43	T3(Phospho): 100
	gGtQEIEHR	1	PBANKA_0302500	HT	hexose transporter	PBANKA_0302500.1-p1	0	43	T3(Phospho): 100
	gGtQEIEHR	1	PBANKA_0302500	HT	hexose transporter	PBANKA_0302500.1-p1	0	29	T3(Phospho): 100
	gGtQEIEHR	1	PBANKA_0302500	HT	hexose transporter	PBANKA_0302500.1-p1	0	27	T3(Phospho): 100
	gGtQEIEHR	1	PBANKA_0302500	HT	hexose transporter	PBANKA_0302500.1-p1	0	24	T3(Phospho): 100
	gGtQEIEHR	1	PBANKA_0302500	HT	hexose transporter	PBANKA_0302500.1-p1	0	23	T3(Phospho): 100
TLNIYNSAEDNFLYDNFIK	1xTMT6plex [K19]; 1xTMT6plex [N-Term]; 1xPhospho [S7(100)]	2	PBANKA_0302800		conserved Plasmodium protein, unknown function	0	0.33	-0.02	0.1	0.21	0.16	1	1	1	1	1		68
	Annotated Sequence	# Proteins	Master Protein Accessions			Protein Accessions	# Missed Cleavages	Ions Score	ptmRS: Best Site Probabilities
	tLNIYNsAEDNFLYDNFIk	1	PBANKA_0302800		conserved Plasmodium protein, unknown function	PBANKA_0302800.1-p1	0	68	S7(Phospho): 100
	tLNIYNsAEDNFLYDNFIk	1	PBANKA_0302800		conserved Plasmodium protein, unknown function	PBANKA_0302800.1-p1	0	66	S7(Phospho): 100
NMIPSSTDSLVGGNLNQFEK	1xTMT6plex [K20]; 1xTMT6plex [N-Term]; 1xPhospho [S9(98.9)]	4	PBANKA_0302800		conserved Plasmodium protein, unknown function	0	0.03	-0.15	0.09	-0.15	-0.01	1	1	1	1	1		60
	Annotated Sequence	# Proteins	Master Protein Accessions			Protein Accessions	# Missed Cleavages	Ions Score	ptmRS: Best Site Probabilities
	nMIPSSTDsLVGGNLNQFEk	1	PBANKA_0302800		conserved Plasmodium protein, unknown function	PBANKA_0302800.1-p1	0	60	S9(Phospho): 98.87
	nMIPSSTDsLVGGNLNQFEk	1	PBANKA_0302800		conserved Plasmodium protein, unknown function	PBANKA_0302800.1-p1	0	59	S9(Phospho): 98.82
	nMIPSSTDsLVGGNLNQFEk	1	PBANKA_0302800		conserved Plasmodium protein, unknown function	PBANKA_0302800.1-p1	0	29	T7(Phospho): 49.8; S9(Phospho): 49.8
	nMIPSSTDsLVGGNLNQFEk	1	PBANKA_0302800		conserved Plasmodium protein, unknown function	PBANKA_0302800.1-p1	0	26	S6(Phospho): 33.25; T7(Phospho): 33.25; S9(Phospho): 33.25
YSINSFNYK	1xTMT6plex [K9]; 1xTMT6plex [N-Term]; 1xPhospho [S5(100)]	4	PBANKA_0302800		conserved Plasmodium protein, unknown function	0	0.33	0.21	0.23	0.08	0.06	1	1	1	1	1		43
	Annotated Sequence	# Proteins	Master Protein Accessions			Protein Accessions	# Missed Cleavages	Ions Score	ptmRS: Best Site Probabilities
	ySINsFNYk	1	PBANKA_0302800		conserved Plasmodium protein, unknown function	PBANKA_0302800.1-p1	0	43	S5(Phospho): 100
	ySINsFNYk	1	PBANKA_0302800		conserved Plasmodium protein, unknown function	PBANKA_0302800.1-p1	0	37	S5(Phospho): 100
	ySINsFNYk	1	PBANKA_0302800		conserved Plasmodium protein, unknown function	PBANKA_0302800.1-p1	0	32	S5(Phospho): 100
	ySINsFNYk	1	PBANKA_0302800		conserved Plasmodium protein, unknown function	PBANKA_0302800.1-p1	0	30	S5(Phospho): 100
CLSIIDDAINK	1xCarbamidomethyl [C1]; 1xTMT6plex [K11]; 1xTMT6plex [N-Term]; 1xPhospho [S3(100)]	4	PBANKA_0302800		conserved Plasmodium protein, unknown function	0	0.15	0.36	0.34	0.16	0.05	1	1	1	1	1		39
	Annotated Sequence	# Proteins	Master Protein Accessions			Protein Accessions	# Missed Cleavages	Ions Score	ptmRS: Best Site Probabilities
	cLsIIDDAINk	1	PBANKA_0302800		conserved Plasmodium protein, unknown function	PBANKA_0302800.1-p1	0	39	S3(Phospho): 100
	cLsIIDDAINk	1	PBANKA_0302800		conserved Plasmodium protein, unknown function	PBANKA_0302800.1-p1	0	36	S3(Phospho): 100
	cLsIIDDAINk	1	PBANKA_0302800		conserved Plasmodium protein, unknown function	PBANKA_0302800.1-p1	0	21	S3(Phospho): 100
	cLsIIDDAINk	1	PBANKA_0302800		conserved Plasmodium protein, unknown function	PBANKA_0302800.1-p1	0	15	S3(Phospho): 100
KASIVSELGMVPSQR	1xOxidation [M10]; 1xTMT6plex [K1]; 1xTMT6plex [N-Term]; 2xPhospho [S3(100); S6(100)]	3	PBANKA_0302800		conserved Plasmodium protein, unknown function	1	-0.03	-0.01	0.13	0.12	0.12	1	1	1	1	1		43
	Annotated Sequence	# Proteins	Master Protein Accessions			Protein Accessions	# Missed Cleavages	Ions Score	ptmRS: Best Site Probabilities
	kAsIVsELGmVPSQR	1	PBANKA_0302800		conserved Plasmodium protein, unknown function	PBANKA_0302800.1-p1	1	43	S3(Phospho): 100; S6(Phospho): 100
	kAsIVsELGmVPSQR	1	PBANKA_0302800		conserved Plasmodium protein, unknown function	PBANKA_0302800.1-p1	1	35	S3(Phospho): 100; S6(Phospho): 100
	kAsIVsELGmVPSQR	1	PBANKA_0302800		conserved Plasmodium protein, unknown function	PBANKA_0302800.1-p1	1	16	S3(Phospho): 100; S6(Phospho): 100
KASIVSELGMVPSQR	1xTMT6plex [K1]; 1xTMT6plex [N-Term]; 2xPhospho [S3(100); S6(100)]	5	PBANKA_0302800		conserved Plasmodium protein, unknown function	1	-0.21	-0.15	-0.25	-0.21	-0.08	1	1	1	1	1		31
	Annotated Sequence	# Proteins	Master Protein Accessions			Protein Accessions	# Missed Cleavages	Ions Score	ptmRS: Best Site Probabilities
	kAsIVsELGMVPSQR	1	PBANKA_0302800		conserved Plasmodium protein, unknown function	PBANKA_0302800.1-p1	1	31	S3(Phospho): 100; S6(Phospho): 100
	kAsIVsELGMVPSQR	1	PBANKA_0302800		conserved Plasmodium protein, unknown function	PBANKA_0302800.1-p1	1	24	S3(Phospho): 100; S6(Phospho): 100
	kAsIVsELGMVPSQR	1	PBANKA_0302800		conserved Plasmodium protein, unknown function	PBANKA_0302800.1-p1	1	23	S3(Phospho): 100; S6(Phospho): 100
	kAsIVsELGMVPSQR	1	PBANKA_0302800		conserved Plasmodium protein, unknown function	PBANKA_0302800.1-p1	1	19	S3(Phospho): 100; S6(Phospho): 100
	kAsIVsELGMVPSQR	1	PBANKA_0302800		conserved Plasmodium protein, unknown function	PBANKA_0302800.1-p1	1	18	S3(Phospho): 100; S6(Phospho): 100
KASIVSELGMVPSQR	1xTMT6plex [K1]; 1xTMT6plex [N-Term]; 1xPhospho [S3(100)]	2	PBANKA_0302800		conserved Plasmodium protein, unknown function	1	0.3	0.05	-0.29	-0.18	0.12	1	1	1	1	1		39
	Annotated Sequence	# Proteins	Master Protein Accessions			Protein Accessions	# Missed Cleavages	Ions Score	ptmRS: Best Site Probabilities
	kAsIVSELGMVPSQR	1	PBANKA_0302800		conserved Plasmodium protein, unknown function	PBANKA_0302800.1-p1	1	39	S3(Phospho): 100
	kAsIVSELGMVPSQR	1	PBANKA_0302800		conserved Plasmodium protein, unknown function	PBANKA_0302800.1-p1	1	37	S3(Phospho): 100
NMIPSSTDSLVGGNLNQFEK	1xOxidation [M2]; 1xTMT6plex [K20]; 1xTMT6plex [N-Term]; 1xPhospho [S9(100)]	4	PBANKA_0302800		conserved Plasmodium protein, unknown function	0	-0.03	-0.1	0.08	0.02	-0.03	1	1	1	1	1		68
	Annotated Sequence	# Proteins	Master Protein Accessions			Protein Accessions	# Missed Cleavages	Ions Score	ptmRS: Best Site Probabilities
	nmIPSSTDsLVGGNLNQFEk	1	PBANKA_0302800		conserved Plasmodium protein, unknown function	PBANKA_0302800.1-p1	0	68	S9(Phospho): 100
	nmIPSSTDsLVGGNLNQFEk	1	PBANKA_0302800		conserved Plasmodium protein, unknown function	PBANKA_0302800.1-p1	0	41	S9(Phospho): 99.35
	nmIPSStDSLVGGNLNQFEk	1	PBANKA_0302800		conserved Plasmodium protein, unknown function	PBANKA_0302800.1-p1	0	25	T7(Phospho): 98.66
	nmIPSSTDsLVGGNLNQFEk	1	PBANKA_0302800		conserved Plasmodium protein, unknown function	PBANKA_0302800.1-p1	0	20	S6(Phospho): 49.6; S9(Phospho): 49.6
KILGENELDDIEEISENDENNEFEEDLIGR	1xTMT6plex [K1]; 1xTMT6plex [N-Term]; 1xPhospho [S15(100)]	1	PBANKA_0303300		conserved Plasmodium protein, unknown function	1	0.05	-0.19	-0.31	-0.51	-0.26							36
	Annotated Sequence	# Proteins	Master Protein Accessions			Protein Accessions	# Missed Cleavages	Ions Score	ptmRS: Best Site Probabilities
	kILGENELDDIEEIsENDENNEFEEDLIGR	1	PBANKA_0303300		conserved Plasmodium protein, unknown function	PBANKA_0303300.1-p1	1	36	S15(Phospho): 100
ILGENELDDIEEISENDENNEFEEDLIGRDGFDGE	1xTMT6plex [N-Term]; 1xPhospho [S14(100)]	1	PBANKA_0303300		conserved Plasmodium protein, unknown function	1	-0.1	-0.29	-0.57	-0.15	-0.5							51
	Annotated Sequence	# Proteins	Master Protein Accessions			Protein Accessions	# Missed Cleavages	Ions Score	ptmRS: Best Site Probabilities
	iLGENELDDIEEIsENDENNEFEEDLIGRDGFDGE	1	PBANKA_0303300		conserved Plasmodium protein, unknown function	PBANKA_0303300.1-p1	1	51	S14(Phospho): 100
ILGENELDDIEEISENDENNEFEEDLIGR	1xTMT6plex [N-Term]; 1xPhospho [S14(100)]	5	PBANKA_0303300		conserved Plasmodium protein, unknown function	0	-0.39	-0.09	-0.21	-0.21	-0.32	1	1	1	1	1		118
	Annotated Sequence	# Proteins	Master Protein Accessions			Protein Accessions	# Missed Cleavages	Ions Score	ptmRS: Best Site Probabilities
	iLGENELDDIEEIsENDENNEFEEDLIGR	1	PBANKA_0303300		conserved Plasmodium protein, unknown function	PBANKA_0303300.1-p1	0	118	S14(Phospho): 100
	iLGENELDDIEEIsENDENNEFEEDLIGR	1	PBANKA_0303300		conserved Plasmodium protein, unknown function	PBANKA_0303300.1-p1	0	99	S14(Phospho): 100
	iLGENELDDIEEIsENDENNEFEEDLIGR	1	PBANKA_0303300		conserved Plasmodium protein, unknown function	PBANKA_0303300.1-p1	0	95	S14(Phospho): 100
	iLGENELDDIEEIsENDENNEFEEDLIGR	1	PBANKA_0303300		conserved Plasmodium protein, unknown function	PBANKA_0303300.1-p1	0	50	S14(Phospho): 100
	iLGENELDDIEEIsENDENNEFEEDLIGR	1	PBANKA_0303300		conserved Plasmodium protein, unknown function	PBANKA_0303300.1-p1	0	43	S14(Phospho): 100
YNDSDIDINENNR	1xTMT6plex [N-Term]; 1xPhospho [S4(100)]	5	PBANKA_0303300		conserved Plasmodium protein, unknown function	0	-0.27	-0.25	-0.2	-0.22	-0.27	1	1	1	1	1		44
	Annotated Sequence	# Proteins	Master Protein Accessions			Protein Accessions	# Missed Cleavages	Ions Score	ptmRS: Best Site Probabilities
	yNDsDIDINENNR	1	PBANKA_0303300		conserved Plasmodium protein, unknown function	PBANKA_0303300.1-p1	0	44	S4(Phospho): 100
	yNDsDIDINENNR	1	PBANKA_0303300		conserved Plasmodium protein, unknown function	PBANKA_0303300.1-p1	0	26	S4(Phospho): 100
	yNDsDIDINENNR	1	PBANKA_0303300		conserved Plasmodium protein, unknown function	PBANKA_0303300.1-p1	0	22	S4(Phospho): 100
	yNDsDIDINENNR	1	PBANKA_0303300		conserved Plasmodium protein, unknown function	PBANKA_0303300.1-p1	0	14	S4(Phospho): 100
	yNDsDIDINENNR	1	PBANKA_0303300		conserved Plasmodium protein, unknown function	PBANKA_0303300.1-p1	0	14	S4(Phospho): 100
YNDSDIDINENNRK	1xTMT6plex [K14]; 1xTMT6plex [N-Term]; 1xPhospho [S4(100)]	1	PBANKA_0303300		conserved Plasmodium protein, unknown function	1	0.15	0.05	-0.08	-0.12	0.03							29
	Annotated Sequence	# Proteins	Master Protein Accessions			Protein Accessions	# Missed Cleavages	Ions Score	ptmRS: Best Site Probabilities
	yNDsDIDINENNRk	1	PBANKA_0303300		conserved Plasmodium protein, unknown function	PBANKA_0303300.1-p1	1	29	S4(Phospho): 100
NIKDEEAVQNQYYANNSITTTSISTSPISGPSK	2xTMT6plex [K3; K33]; 1xTMT6plex [N-Term]; 1xPhospho [S26(100)]	4	PBANKA_0303600	RPN1	26S proteasome regulatory subunit RPN1, putative	1	-0.16	-0.05	-0.12	-0.19	-0.19	1	1	1	1	1		48
	Annotated Sequence	# Proteins	Master Protein Accessions			Protein Accessions	# Missed Cleavages	Ions Score	ptmRS: Best Site Probabilities
	nIkDEEAVQNQYYANNsITTTSISTSPISGPSk	1	PBANKA_0303600	RPN1	26S proteasome regulatory subunit RPN1, putative	PBANKA_0303600.1-p1	1	48	S17(Phospho): 95.01
	nIkDEEAVQNQYYANNSITTTSISTsPISGPSk	1	PBANKA_0303600	RPN1	26S proteasome regulatory subunit RPN1, putative	PBANKA_0303600.1-p1	1	38	S26(Phospho): 98.6
	nIkDEEAVQNQYYANNSITTTSISTsPISGPSk	1	PBANKA_0303600	RPN1	26S proteasome regulatory subunit RPN1, putative	PBANKA_0303600.1-p1	1	35	S26(Phospho): 99.98
	nIkDEEAVQNQYYANNSITTTSISTsPISGPSk	1	PBANKA_0303600	RPN1	26S proteasome regulatory subunit RPN1, putative	PBANKA_0303600.1-p1	1	15	S26(Phospho): 92.98
NTDTSSVNSPTGDTNTANDTNAGANSGDNEGNNNSNNNSAPDSK	1xTMT6plex [K44]; 1xTMT6plex [N-Term]	1	PBANKA_0303600	RPN1	26S proteasome regulatory subunit RPN1, putative	0	-0.04	-0.25	-0.22	-0.22	-0.13							66
	Annotated Sequence	# Proteins	Master Protein Accessions			Protein Accessions	# Missed Cleavages	Ions Score	ptmRS: Best Site Probabilities
	nTDTSSVNSPTGDTNTANDTNAGANSGDNEGNNNSNNNSAPDSk	1	PBANKA_0303600	RPN1	26S proteasome regulatory subunit RPN1, putative	PBANKA_0303600.1-p1	0	66
KETSSYMEGSIIDGNNEIIVEPK	2xTMT6plex [K1; K23]; 1xTMT6plex [N-Term]; 1xPhospho [T3(99.1)]	6	PBANKA_0303900	PAT	pantothenate transporter	1	0.04	0.38	0.54	0.26	0.26	1	1	1	1	1		53
	Annotated Sequence	# Proteins	Master Protein Accessions			Protein Accessions	# Missed Cleavages	Ions Score	ptmRS: Best Site Probabilities
	kEtSSYMEGSIIDGNNEIIVEPk	1	PBANKA_0303900	PAT	pantothenate transporter	PBANKA_0303900.1-p1	1	53	T3(Phospho): 100
	kETSsYMEGSIIDGNNEIIVEPk	1	PBANKA_0303900	PAT	pantothenate transporter	PBANKA_0303900.1-p1	1	40	T3(Phospho): 98.57
	kEtSSYMEGSIIDGNNEIIVEPk	1	PBANKA_0303900	PAT	pantothenate transporter	PBANKA_0303900.1-p1	1	39	T3(Phospho): 99.1
	kEtSSYMEGSIIDGNNEIIVEPk	1	PBANKA_0303900	PAT	pantothenate transporter	PBANKA_0303900.1-p1	1	26	T3(Phospho): 98.72
	kEtSSYMEGSIIDGNNEIIVEPk	1	PBANKA_0303900	PAT	pantothenate transporter	PBANKA_0303900.1-p1	1	16	T3(Phospho): 98.43
	kEtSSYMEGSIIDGNNEIIVEPk	1	PBANKA_0303900	PAT	pantothenate transporter	PBANKA_0303900.1-p1	1	14	T3(Phospho): 99.99
KASFPINNVLAEETEK	2xTMT6plex [K1; K16]; 1xTMT6plex [N-Term]; 1xPhospho [S3(100)]	4	PBANKA_0303900	PAT	pantothenate transporter	1	0.36	0.24	0.31	0.37	0.1	1	1	1	1	1		47
	Annotated Sequence	# Proteins	Master Protein Accessions			Protein Accessions	# Missed Cleavages	Ions Score	ptmRS: Best Site Probabilities
	kAsFPINNVLAEETEk	1	PBANKA_0303900	PAT	pantothenate transporter	PBANKA_0303900.1-p1	1	47	S3(Phospho): 100
	kAsFPINNVLAEETEk	1	PBANKA_0303900	PAT	pantothenate transporter	PBANKA_0303900.1-p1	1	34	S3(Phospho): 100
	kAsFPINNVLAEETEk	1	PBANKA_0303900	PAT	pantothenate transporter	PBANKA_0303900.1-p1	1	25	S3(Phospho): 100
	kAsFPINNVLAEETEk	1	PBANKA_0303900	PAT	pantothenate transporter	PBANKA_0303900.1-p1	1	18	S3(Phospho): 100
KETSSYMEGSIIDGNNEIIVEPK	1xOxidation [M7]; 2xTMT6plex [K1; K23]; 1xTMT6plex [N-Term]; 1xPhospho [T3(100)]	2	PBANKA_0303900	PAT	pantothenate transporter	1	-0.03	-0.14	-0.15	-0.02	0.02	1	1	1	1	1		24
	Annotated Sequence	# Proteins	Master Protein Accessions			Protein Accessions	# Missed Cleavages	Ions Score	ptmRS: Best Site Probabilities
	kEtSSYmEGSIIDGNNEIIVEPk	1	PBANKA_0303900	PAT	pantothenate transporter	PBANKA_0303900.1-p1	1	24	T3(Phospho): 99.98
	kEtSSYmEGSIIDGNNEIIVEPk	1	PBANKA_0303900	PAT	pantothenate transporter	PBANKA_0303900.1-p1	1	18	T3(Phospho): 99.99
ASFPINNVLAEETEK	1xTMT6plex [K15]; 1xTMT6plex [N-Term]; 1xPhospho [S2(100)]	1	PBANKA_0303900	PAT	pantothenate transporter	0	0.05	0.07	-0.08	-0.24	0.42							45
	Annotated Sequence	# Proteins	Master Protein Accessions			Protein Accessions	# Missed Cleavages	Ions Score	ptmRS: Best Site Probabilities
	asFPINNVLAEETEk	1	PBANKA_0303900	PAT	pantothenate transporter	PBANKA_0303900.1-p1	0	45	S2(Phospho): 100
RSQSYMLYQNVK	1xOxidation [M6]; 1xTMT6plex [K12]; 1xTMT6plex [N-Term]; 1xPhospho [S4(99.7)]	2	PBANKA_0303900	PAT	pantothenate transporter	1	-0.12	0.09	0.33	0.27	0.39	1	1	1	1	1		34
	Annotated Sequence	# Proteins	Master Protein Accessions			Protein Accessions	# Missed Cleavages	Ions Score	ptmRS: Best Site Probabilities
	rSQsYmLYQNVk	1	PBANKA_0303900	PAT	pantothenate transporter	PBANKA_0303900.1-p1	1	34	S4(Phospho): 99.69
	rSQsYmLYQNVk	1	PBANKA_0303900	PAT	pantothenate transporter	PBANKA_0303900.1-p1	1	19	S4(Phospho): 100
RSQSYMLYQNVK	1xTMT6plex [K12]; 1xTMT6plex [N-Term]; 1xPhospho [S/Y]	2	PBANKA_0303900	PAT	pantothenate transporter	1	0.26	0.34	0.56	0.34	0.41	1	1	0.96809	1	1		21
	Annotated Sequence	# Proteins	Master Protein Accessions			Protein Accessions	# Missed Cleavages	Ions Score	ptmRS: Best Site Probabilities
	rSQsYMLYQNVk	1	PBANKA_0303900	PAT	pantothenate transporter	PBANKA_0303900.1-p1	1	21	S2(Phospho): 50; S4(Phospho): 50
	rSQsYMLYQNVk	1	PBANKA_0303900	PAT	pantothenate transporter	PBANKA_0303900.1-p1	1	16	S4(Phospho): 99.71
LKSPYFNSSK	2xTMT6plex [K2; K10]; 1xTMT6plex [N-Term]; 1xPhospho [S3(100)]	1	PBANKA_0304900	SERA3	serine repeat antigen 3	1	0.35	0.67	0.78	0.31	0.78							23
	Annotated Sequence	# Proteins	Master Protein Accessions			Protein Accessions	# Missed Cleavages	Ions Score	ptmRS: Best Site Probabilities
	lksPYFNSSk	1	PBANKA_0304900	SERA3	serine repeat antigen 3	PBANKA_0304900.1-p1	1	23	S3(Phospho): 100
QILSAVSVTSDAESSVVDVR	1xTMT6plex [N-Term]	1	PBANKA_0304900	SERA3	serine repeat antigen 3	0	-0.37	0.01	0.24	0.44	-0.26							60
	Annotated Sequence	# Proteins	Master Protein Accessions			Protein Accessions	# Missed Cleavages	Ions Score	ptmRS: Best Site Probabilities
	qILSAVSVTSDAESSVVDVR	1	PBANKA_0304900	SERA3	serine repeat antigen 3	PBANKA_0304900.1-p1	0	60
SYFPQLSSNFYHSLYYNNYEGYEAK	1xTMT6plex [K25]; 1xTMT6plex [N-Term]; 1xPhospho [S/Y]	1	PBANKA_0304900	SERA3	serine repeat antigen 3	0	-0.32	-0.52	-0.37	-0.74	-0.46							49
	Annotated Sequence	# Proteins	Master Protein Accessions			Protein Accessions	# Missed Cleavages	Ions Score	ptmRS: Best Site Probabilities
	sYFPQLSsNFYHSLYYNNYEGYEAk	1	PBANKA_0304900	SERA3	serine repeat antigen 3	PBANKA_0304900.1-p1	0	49	S7(Phospho): 50; S8(Phospho): 50
NLEELNNTNSTINYEEGLDGIIDLTK	1xTMT6plex [K26]; 1xTMT6plex [N-Term]; 1xPhospho [S10(98.6)]	3	PBANKA_0305000	SERA2	serine repeat antigen 2	0	0.11	0.4	0.32	0.58	0.06	1	1	1	1	1		84
	Annotated Sequence	# Proteins	Master Protein Accessions			Protein Accessions	# Missed Cleavages	Ions Score	ptmRS: Best Site Probabilities
	nLEELNNTNsTINYEEGLDGIIDLTk	1	PBANKA_0305000	SERA2	serine repeat antigen 2	PBANKA_0305000.1-p1	0	84	S10(Phospho): 98.58
	nLEELNNTNsTINYEEGLDGIIDLTk	1	PBANKA_0305000	SERA2	serine repeat antigen 2	PBANKA_0305000.1-p1	0	76	S10(Phospho): 97.84
	nLEELNNTNsTINYEEGLDGIIDLTk	1	PBANKA_0305000	SERA2	serine repeat antigen 2	PBANKA_0305000.1-p1	0	48	S10(Phospho): 97.28
YNTYDEVEEHSCSR	1xCarbamidomethyl [C12]; 1xTMT6plex [N-Term]; 1xPhospho [T3(100)]	1	PBANKA_0305000	SERA2	serine repeat antigen 2	0	-0.08	0.21	-0.19	-0.04	0.46							44
	Annotated Sequence	# Proteins	Master Protein Accessions			Protein Accessions	# Missed Cleavages	Ions Score	ptmRS: Best Site Probabilities
	yNtYDEVEEHScSR	1	PBANKA_0305000	SERA2	serine repeat antigen 2	PBANKA_0305000.1-p1	0	44	T3(Phospho): 100
TIDDEPVSPLGLLANK	1xTMT6plex [K16]; 1xTMT6plex [N-Term]; 1xPhospho [S8(100)]	2	PBANKA_0305000	SERA2	serine repeat antigen 2	0	0.27	0.48	0.88	0.55	0.79	1	1	0.188457	1	0.570205		48
	Annotated Sequence	# Proteins	Master Protein Accessions			Protein Accessions	# Missed Cleavages	Ions Score	ptmRS: Best Site Probabilities
	tIDDEPVsPLGLLANk	1	PBANKA_0305000	SERA2	serine repeat antigen 2	PBANKA_0305000.1-p1	0	48	S8(Phospho): 100
	tIDDEPVsPLGLLANk	1	PBANKA_0305000	SERA2	serine repeat antigen 2	PBANKA_0305000.1-p1	0	45	S8(Phospho): 100
SLSPQPQNSQPQNSQTQDSQTQDSQTQQQSQR	1xTMT6plex [N-Term]; 1xPhospho [S3(100)]	2	PBANKA_0305000	SERA2	serine repeat antigen 2	0	-0.17	-0.07	-0.66	-0.26	-0.14	1	1	1	1	1		56
	Annotated Sequence	# Proteins	Master Protein Accessions			Protein Accessions	# Missed Cleavages	Ions Score	ptmRS: Best Site Probabilities
	sLsPQPQNSQPQNSQTQDSQTQDSQTQQQSQR	1	PBANKA_0305000	SERA2	serine repeat antigen 2	PBANKA_0305000.1-p1	0	56	S3(Phospho): 99.99
	sLsPQPQNSQPQNSQTQDSQTQDSQTQQQSQR	1	PBANKA_0305000	SERA2	serine repeat antigen 2	PBANKA_0305000.1-p1	0	47	S3(Phospho): 99.99
NATEEPQSDDASISSNETNVVNNSVIKPR	1xTMT6plex [K27]; 1xTMT6plex [N-Term]; 2xPhospho [S8(100); S/T]	1	PBANKA_0305000	SERA2	serine repeat antigen 2	0											No Quan Values	36
	Annotated Sequence	# Proteins	Master Protein Accessions			Protein Accessions	# Missed Cleavages	Ions Score	ptmRS: Best Site Probabilities
	nATEEPQsDDAsISSNETNVVNNSVIkPR	1	PBANKA_0305000	SERA2	serine repeat antigen 2	PBANKA_0305000.1-p1	0	36	S8(Phospho): 100; S14(Phospho): 49.99; S15(Phospho): 49.99
SEATTGSDSSKNATEEPQSDDASISSNETNVVNNSVIKPR	2xTMT6plex [K11; K38]; 1xTMT6plex [N-Term]; 1xPhospho [S19(99)]	1	PBANKA_0305000	SERA2	serine repeat antigen 2	1	-0.39	-0.2	-0.34	-0.25	-0.36							36
	Annotated Sequence	# Proteins	Master Protein Accessions			Protein Accessions	# Missed Cleavages	Ions Score	ptmRS: Best Site Probabilities
	sEATTGSDSSkNATEEPQSDDASISsNETNVVNNSVIkPR	1	PBANKA_0305000	SERA2	serine repeat antigen 2	PBANKA_0305000.1-p1	1	36	S19(Phospho): 98.97
NATEEPQSDDASISSNETNVVNNSVIKPR	1xTMT6plex [K27]; 1xTMT6plex [N-Term]; 1xPhospho [S/T]	6	PBANKA_0305000	SERA2	serine repeat antigen 2	0	-0.51	0.01	-0.28	-0.29	-0.34	1	1	1	1	1		67
	Annotated Sequence	# Proteins	Master Protein Accessions			Protein Accessions	# Missed Cleavages	Ions Score	ptmRS: Best Site Probabilities
	nATEEPQSDDASISsNETNVVNNSVIkPR	1	PBANKA_0305000	SERA2	serine repeat antigen 2	PBANKA_0305000.1-p1	0	67	S12(Phospho): 33.33; S14(Phospho): 33.33; S15(Phospho): 33.33
	nATEEPQSDDAsISSNETNVVNNSVIkPR	1	PBANKA_0305000	SERA2	serine repeat antigen 2	PBANKA_0305000.1-p1	0	55	S12(Phospho): 49.82; S14(Phospho): 49.82
	nATEEPQSDDAsISSNETNVVNNSVIkPR	1	PBANKA_0305000	SERA2	serine repeat antigen 2	PBANKA_0305000.1-p1	0	48	S12(Phospho): 99.99
	nATEEPQSDDAsISSNETNVVNNSVIkPR	1	PBANKA_0305000	SERA2	serine repeat antigen 2	PBANKA_0305000.1-p1	0	43	S8(Phospho): 20; S12(Phospho): 20; S14(Phospho): 20; S15(Phospho): 20; T18(Phospho): 20
	nATEEPQSDDASISSNEtNVVNNSVIkPR	1	PBANKA_0305000	SERA2	serine repeat antigen 2	PBANKA_0305000.1-p1	0	27	S8(Phospho): 95.53
	nATEEPQSDDASISSNEtNVVNNSVIkPR	1	PBANKA_0305000	SERA2	serine repeat antigen 2	PBANKA_0305000.1-p1	0	26	S12(Phospho): 24.95; S14(Phospho): 24.95; S15(Phospho): 24.95; T18(Phospho): 24.95
SLSPQPQNSQPQNSQTQDSQTQDSQTQQQSQR	1xTMT6plex [N-Term]	4	PBANKA_0305000	SERA2	serine repeat antigen 2	0	-1.01	-0.12	-0.02	-0.36	-0.54	1	1	1	1	1		59
	Annotated Sequence	# Proteins	Master Protein Accessions			Protein Accessions	# Missed Cleavages	Ions Score	ptmRS: Best Site Probabilities
	sLSPQPQNSQPQNSQTQDSQTQDSQTQQQSQR	1	PBANKA_0305000	SERA2	serine repeat antigen 2	PBANKA_0305000.1-p1	0	59
	sLSPQPQNSQPQNSQTQDSQTQDSQTQQQSQR	1	PBANKA_0305000	SERA2	serine repeat antigen 2	PBANKA_0305000.1-p1	0	58
	sLSPQPQNSQPQNSQTQDSQTQDSQTQQQSQR	1	PBANKA_0305000	SERA2	serine repeat antigen 2	PBANKA_0305000.1-p1	0	50
	sLSPQPQNSQPQNSQTQDSQTQDSQTQQQSQR	1	PBANKA_0305000	SERA2	serine repeat antigen 2	PBANKA_0305000.1-p1	0	16
SIQSESEINLYYSK	1xTMT6plex [K14]; 1xTMT6plex [N-Term]; 1xPhospho [S4(100)]	5	PBANKA_0305100	SERA1	serine repeat antigen 1	0	0.22	0.31	0.35	0.27	0.31	1	1	1	1	1		49
	Annotated Sequence	# Proteins	Master Protein Accessions			Protein Accessions	# Missed Cleavages	Ions Score	ptmRS: Best Site Probabilities
	sIQsESEINLYYSk	1	PBANKA_0305100	SERA1	serine repeat antigen 1	PBANKA_0305100.1-p1	0	49	S4(Phospho): 100
	sIQsESEINLYYSk	1	PBANKA_0305100	SERA1	serine repeat antigen 1	PBANKA_0305100.1-p1	0	46	S4(Phospho): 100
	sIQsESEINLYYSk	1	PBANKA_0305100	SERA1	serine repeat antigen 1	PBANKA_0305100.1-p1	0	46	S4(Phospho): 100
	sIQsESEINLYYSk	1	PBANKA_0305100	SERA1	serine repeat antigen 1	PBANKA_0305100.1-p1	0	37	S4(Phospho): 100
	sIQsESEINLYYSk	1	PBANKA_0305100	SERA1	serine repeat antigen 1	PBANKA_0305100.1-p1	0	32	S4(Phospho): 100
VVEGTGELEKPTISDSGSESDKAEVIEGQK	3xTMT6plex [K10; K22; K30]; 1xTMT6plex [N-Term]; 1xPhospho [S/T]	1	PBANKA_0305100	SERA1	serine repeat antigen 1	1	-0.16	-0.44	-0.41	-0.36	-0.26							19
	Annotated Sequence	# Proteins	Master Protein Accessions			Protein Accessions	# Missed Cleavages	Ions Score	ptmRS: Best Site Probabilities
	vVEGTGELEkPTISDsGSESDkAEVIEGQk	1	PBANKA_0305100	SERA1	serine repeat antigen 1	PBANKA_0305100.1-p1	1	19	S14(Phospho): 25; S16(Phospho): 25; S18(Phospho): 25; S20(Phospho): 25
FYFLSQDFADYELK	1xTMT6plex [K14]; 1xTMT6plex [N-Term]; 1xPhospho [S5(100)]	1	PBANKA_0306000	P23p	6-cysteine protein P23p	0	0.54	0.48	0.48	0.11	0.46							60
	Annotated Sequence	# Proteins	Master Protein Accessions			Protein Accessions	# Missed Cleavages	Ions Score	ptmRS: Best Site Probabilities
	fYFLsQDFADYELk	1	PBANKA_0306000	P23p	6-cysteine protein P23p	PBANKA_0306000.1-p1	0	60	S5(Phospho): 100
LSTGMVEFLIPPYSR	1xTMT6plex [N-Term]; 1xPhospho [S/T/Y]	1	PBANKA_0306000	P23p	6-cysteine protein P23p	0	0.6	0.6	1	-0.09	-0.21							26
	Annotated Sequence	# Proteins	Master Protein Accessions			Protein Accessions	# Missed Cleavages	Ions Score	ptmRS: Best Site Probabilities
	lStGMVEFLIPPYSR	1	PBANKA_0306000	P23p	6-cysteine protein P23p	PBANKA_0306000.1-p1	0	26	S2(Phospho): 50; T3(Phospho): 50
YRSSSYAQVPETFDTILK	1xTMT6plex [K18]; 1xTMT6plex [N-Term]; 1xPhospho [S/Y/T]	1	PBANKA_0306100	P23	6-cysteine protein P23	1	-0.14	0.09	-0.06	0.02	0.27							25
	Annotated Sequence	# Proteins	Master Protein Accessions			Protein Accessions	# Missed Cleavages	Ions Score	ptmRS: Best Site Probabilities
	yRSSsYAQVPETFDTILk	1	PBANKA_0306100	P23	6-cysteine protein P23	PBANKA_0306100.1-p1	1	25	S3(Phospho): 33.33; S4(Phospho): 33.33; S5(Phospho): 33.33
LQSALPGVIFLNNK	1xTMT6plex [K14]; 1xTMT6plex [N-Term]; 1xPhospho [S3(100)]	2	PBANKA_0306100	P23	6-cysteine protein P23	0	0.71	0.84	0.77	0.85	1.01	1	0.543935	0.59843	0.602821	0.302044		50
	Annotated Sequence	# Proteins	Master Protein Accessions			Protein Accessions	# Missed Cleavages	Ions Score	ptmRS: Best Site Probabilities
	lQsALPGVIFLNNk	1	PBANKA_0306100	P23	6-cysteine protein P23	PBANKA_0306100.1-p1	0	50	S3(Phospho): 100
	lQsALPGVIFLNNk	1	PBANKA_0306100	P23	6-cysteine protein P23	PBANKA_0306100.1-p1	0	37	S3(Phospho): 100
HTLSSILK	1xTMT6plex [K8]; 1xTMT6plex [N-Term]; 1xPhospho [S4(100)]	1	PBANKA_0306100	P23	6-cysteine protein P23	0	0.26	0.03	0.73	0.53	0.29							26
	Annotated Sequence	# Proteins	Master Protein Accessions			Protein Accessions	# Missed Cleavages	Ions Score	ptmRS: Best Site Probabilities
	hTLsSILk	1	PBANKA_0306100	P23	6-cysteine protein P23	PBANKA_0306100.1-p1	0	26	S4(Phospho): 100
KYNTTPELEVDSNIK	2xTMT6plex [K1; K15]; 1xTMT6plex [N-Term]; 1xPhospho [T4(100)]	1	PBANKA_0306100	P23	6-cysteine protein P23	1	-0.11	-0.01	0.06	-0.17	0.28							36
	Annotated Sequence	# Proteins	Master Protein Accessions			Protein Accessions	# Missed Cleavages	Ions Score	ptmRS: Best Site Probabilities
	kYNtTPELEVDSNIk	1	PBANKA_0306100	P23	6-cysteine protein P23	PBANKA_0306100.1-p1	1	36	T4(Phospho): 100
YNTTPELEVDSNIK	1xTMT6plex [K14]; 1xTMT6plex [N-Term]; 1xPhospho [T3(99.8)]	3	PBANKA_0306100	P23	6-cysteine protein P23	0	-0.11	0.13	0.15	0.02	0.21	1	1	1	1	1		49
	Annotated Sequence	# Proteins	Master Protein Accessions			Protein Accessions	# Missed Cleavages	Ions Score	ptmRS: Best Site Probabilities
	yNtTPELEVDSNIk	1	PBANKA_0306100	P23	6-cysteine protein P23	PBANKA_0306100.1-p1	0	49	T3(Phospho): 99.79
	yNtTPELEVDSNIk	1	PBANKA_0306100	P23	6-cysteine protein P23	PBANKA_0306100.1-p1	0	28	T3(Phospho): 99.66
	yNtTPELEVDSNIk	1	PBANKA_0306100	P23	6-cysteine protein P23	PBANKA_0306100.1-p1	0	22	T3(Phospho): 99.64
SSSYAQVPETFDTILK	1xTMT6plex [K16]; 1xTMT6plex [N-Term]; 1xPhospho [S1(99.2)]	2	PBANKA_0306100	P23	6-cysteine protein P23	0	0.05	-0.04	0.12	0.05	-0.23	1	1	1	1	1		30
	Annotated Sequence	# Proteins	Master Protein Accessions			Protein Accessions	# Missed Cleavages	Ions Score	ptmRS: Best Site Probabilities
	sSsYAQVPETFDTILk	1	PBANKA_0306100	P23	6-cysteine protein P23	PBANKA_0306100.1-p1	0	30	S1(Phospho): 99.99
	sSsYAQVPETFDTILk	1	PBANKA_0306100	P23	6-cysteine protein P23	PBANKA_0306100.1-p1	0	19	S1(Phospho): 99.19
GVNESGAMR	1xOxidation [M8]; 1xTMT6plex [N-Term]; 1xPhospho [S5(100)]	8	PBANKA_0306800	UAP56	ATP-dependent RNA helicase UAP56, putative	0	-0.03	0.18	-0.09	0.07	0.18	1	1	1	1	1		29
	Annotated Sequence	# Proteins	Master Protein Accessions			Protein Accessions	# Missed Cleavages	Ions Score	ptmRS: Best Site Probabilities
	gVNEsGAmR	1	PBANKA_0306800	UAP56	ATP-dependent RNA helicase UAP56, putative	PBANKA_0306800.1-p1	0	29	S5(Phospho): 100
	gVNEsGAmR	1	PBANKA_0306800	UAP56	ATP-dependent RNA helicase UAP56, putative	PBANKA_0306800.1-p1	0	28	S5(Phospho): 100
	gVNEsGAmR	1	PBANKA_0306800	UAP56	ATP-dependent RNA helicase UAP56, putative	PBANKA_0306800.1-p1	0	21	S5(Phospho): 100
	gVNEsGAmR	1	PBANKA_0306800	UAP56	ATP-dependent RNA helicase UAP56, putative	PBANKA_0306800.1-p1	0	21	S5(Phospho): 100
	gVNEsGAmR	1	PBANKA_0306800	UAP56	ATP-dependent RNA helicase UAP56, putative	PBANKA_0306800.1-p1	0	20	S5(Phospho): 100
	gVNEsGAmR	1	PBANKA_0306800	UAP56	ATP-dependent RNA helicase UAP56, putative	PBANKA_0306800.1-p1	0	17	S5(Phospho): 100
	gVNEsGAmR	1	PBANKA_0306800	UAP56	ATP-dependent RNA helicase UAP56, putative	PBANKA_0306800.1-p1	0	17	S5(Phospho): 100
	gVNEsGAmR	1	PBANKA_0306800	UAP56	ATP-dependent RNA helicase UAP56, putative	PBANKA_0306800.1-p1	0	15	S5(Phospho): 100
AISESGFEHPSEVQQETIPAAITGTDILCQAK	1xCarbamidomethyl [C29]; 1xTMT6plex [K32]; 1xTMT6plex [N-Term]; 1xPhospho [S3(100)]	1	PBANKA_0306800	UAP56	ATP-dependent RNA helicase UAP56, putative	0	-0.64	-0.51	-0.33	-0.29	-0.7							42
	Annotated Sequence	# Proteins	Master Protein Accessions			Protein Accessions	# Missed Cleavages	Ions Score	ptmRS: Best Site Probabilities
	aIsESGFEHPSEVQQETIPAAITGTDILcQAk	1	PBANKA_0306800	UAP56	ATP-dependent RNA helicase UAP56, putative	PBANKA_0306800.1-p1	0	42	S3(Phospho): 99.99
YGTRYGSSLR	1xTMT6plex [N-Term]; 1xPhospho [T3(100)]	4	PBANKA_0307000		6S ribosomal protein L37ae, putative	1	-0.36	0.2	0.13	0.03	0.24	1	1	1	1	1		25
	Annotated Sequence	# Proteins	Master Protein Accessions			Protein Accessions	# Missed Cleavages	Ions Score	ptmRS: Best Site Probabilities
	yGtRYGSSLR	1	PBANKA_0307000		6S ribosomal protein L37ae, putative	PBANKA_0307000.1-p1	1	25	T3(Phospho): 100
	yGtRYGSSLR	1	PBANKA_0307000		6S ribosomal protein L37ae, putative	PBANKA_0307000.1-p1	1	17	T3(Phospho): 100
	yGtRYGSSLR	1	PBANKA_0307000		6S ribosomal protein L37ae, putative	PBANKA_0307000.1-p1	1	16	T3(Phospho): 100
	yGtRYGSSLR	1	PBANKA_0307000		6S ribosomal protein L37ae, putative	PBANKA_0307000.1-p1	1	16	T3(Phospho): 100
YGSSLR	1xTMT6plex [N-Term]; 1xPhospho [S3(100)]	2	PBANKA_0307000		6S ribosomal protein L37ae, putative	0	0.27	0.36	0.23	0.3	0.15	1	1	1	1	1		16
	Annotated Sequence	# Proteins	Master Protein Accessions			Protein Accessions	# Missed Cleavages	Ions Score	ptmRS: Best Site Probabilities
	yGsSLR	1	PBANKA_0307000		6S ribosomal protein L37ae, putative	PBANKA_0307000.1-p1	0	16	S3(Phospho): 100
	yGsSLR	1	PBANKA_0307000		6S ribosomal protein L37ae, putative	PBANKA_0307000.1-p1	0	15	S3(Phospho): 100
DVKSNIDVEPEILK	2xTMT6plex [K3; K14]; 1xTMT6plex [N-Term]; 1xPhospho [S4(100)]	3	PBANKA_0307100		conserved Plasmodium protein, unknown function	1	0.16	0.23	0.47	0.21	0.14	1	1	0.801538	1	1		28
	Annotated Sequence	# Proteins	Master Protein Accessions			Protein Accessions	# Missed Cleavages	Ions Score	ptmRS: Best Site Probabilities
	dVksNIDVEPEILk	1	PBANKA_0307100		conserved Plasmodium protein, unknown function	PBANKA_0307100.1-p1	1	28	S4(Phospho): 100
	dVksNIDVEPEILk	1	PBANKA_0307100		conserved Plasmodium protein, unknown function	PBANKA_0307100.1-p1	1	24	S4(Phospho): 100
	dVksNIDVEPEILk	1	PBANKA_0307100		conserved Plasmodium protein, unknown function	PBANKA_0307100.1-p1	1	19	S4(Phospho): 100
TSESDHSQNEYSPLGNKK	2xTMT6plex [K17; K18]; 1xTMT6plex [N-Term]; 2xPhospho [S4(100); S7(100)]	1	PBANKA_0307100		conserved Plasmodium protein, unknown function	1	-0.17	-0.11	-0.41	-0.2	-0.16							15
	Annotated Sequence	# Proteins	Master Protein Accessions			Protein Accessions	# Missed Cleavages	Ions Score	ptmRS: Best Site Probabilities
	tSEsDHsQNEYSPLGNkk	1	PBANKA_0307100		conserved Plasmodium protein, unknown function	PBANKA_0307100.1-p1	1	15	S4(Phospho): 100; S7(Phospho): 100
DAESTNADEDDYDFSFYNNNDQNK	1xTMT6plex [K24]; 1xTMT6plex [N-Term]; 1xPhospho [S4(99.4)]	4	PBANKA_0307100		conserved Plasmodium protein, unknown function	0	-0.09	-0.17	-0.09	-0.19	-0.35	1	1	1	1	1		90
	Annotated Sequence	# Proteins	Master Protein Accessions			Protein Accessions	# Missed Cleavages	Ions Score	ptmRS: Best Site Probabilities
	dAEsTNADEDDYDFSFYNNNDQNk	1	PBANKA_0307100		conserved Plasmodium protein, unknown function	PBANKA_0307100.1-p1	0	90	S4(Phospho): 99.41
	dAEStNADEDDYDFSFYNNNDQNk	1	PBANKA_0307100		conserved Plasmodium protein, unknown function	PBANKA_0307100.1-p1	0	64	S4(Phospho): 99.52
	dAEsTNADEDDYDFSFYNNNDQNk	1	PBANKA_0307100		conserved Plasmodium protein, unknown function	PBANKA_0307100.1-p1	0	54	S4(Phospho): 99.42
	dAEStNADEDDYDFSFYNNNDQNk	1	PBANKA_0307100		conserved Plasmodium protein, unknown function	PBANKA_0307100.1-p1	0	40	S4(Phospho): 99.46
RNSFLK	1xTMT6plex [K6]; 1xTMT6plex [N-Term]; 1xPhospho [S3(100)]	2	PBANKA_0307100		conserved Plasmodium protein, unknown function	1	0.58	1.03	1.02	0.82	0.81	1	1	1	1	1		14
	Annotated Sequence	# Proteins	Master Protein Accessions			Protein Accessions	# Missed Cleavages	Ions Score	ptmRS: Best Site Probabilities
	rNsFLk	1	PBANKA_0307100		conserved Plasmodium protein, unknown function	PBANKA_0307100.1-p1	1	14	S3(Phospho): 100
	rNsFLk	1	PBANKA_0307100		conserved Plasmodium protein, unknown function	PBANKA_0307100.1-p1	1	14	S3(Phospho): 100
TTGSIYGININDTK	1xTMT6plex [K14]; 1xTMT6plex [N-Term]; 1xPhospho [S4(100)]	4	PBANKA_0307100		conserved Plasmodium protein, unknown function	0	-0.01	-0.23	-0.05	-0.18	-0.03							44
	Annotated Sequence	# Proteins	Master Protein Accessions			Protein Accessions	# Missed Cleavages	Ions Score	ptmRS: Best Site Probabilities
	tTGsIYGININDTk	1	PBANKA_0307100		conserved Plasmodium protein, unknown function	PBANKA_0307100.1-p1	0	44	S4(Phospho): 100
	tTGsIYGININDTk	1	PBANKA_0307100		conserved Plasmodium protein, unknown function	PBANKA_0307100.1-p1	0	33	S4(Phospho): 100
	tTGsIYGININDTk	1	PBANKA_0307100		conserved Plasmodium protein, unknown function	PBANKA_0307100.1-p1	0	33	S4(Phospho): 100
	tTGsIYGININDTk	1	PBANKA_0307100		conserved Plasmodium protein, unknown function	PBANKA_0307100.1-p1	0	32	S4(Phospho): 100
NTKDAESTNADEDDYDFSFYNNNDQNK	2xTMT6plex [K3; K27]; 1xTMT6plex [N-Term]; 1xPhospho [S7(100)]	2	PBANKA_0307100		conserved Plasmodium protein, unknown function	1	-0.14	-0.19	-0.25	-0.27	0.11	1	1	1	1	1		57
	Annotated Sequence	# Proteins	Master Protein Accessions			Protein Accessions	# Missed Cleavages	Ions Score	ptmRS: Best Site Probabilities
	nTkDAEsTNADEDDYDFSFYNNNDQNk	1	PBANKA_0307100		conserved Plasmodium protein, unknown function	PBANKA_0307100.1-p1	1	57	S7(Phospho): 100
	nTkDAEsTNADEDDYDFSFYNNNDQNk	1	PBANKA_0307100		conserved Plasmodium protein, unknown function	PBANKA_0307100.1-p1	1	54	S7(Phospho): 99.43
YTHTNSNQIEEK	1xTMT6plex [K12]; 1xTMT6plex [N-Term]; 1xPhospho [S6(100)]	3	PBANKA_0307100		conserved Plasmodium protein, unknown function	0	0	0.09	-0.32	-0.17	-0.17							35
	Annotated Sequence	# Proteins	Master Protein Accessions			Protein Accessions	# Missed Cleavages	Ions Score	ptmRS: Best Site Probabilities
	yTHTNsNQIEEk	1	PBANKA_0307100		conserved Plasmodium protein, unknown function	PBANKA_0307100.1-p1	0	35	S6(Phospho): 100
	yTHTNsNQIEEk	1	PBANKA_0307100		conserved Plasmodium protein, unknown function	PBANKA_0307100.1-p1	0	17	S6(Phospho): 100
	yTHTNsNQIEEk	1	PBANKA_0307100		conserved Plasmodium protein, unknown function	PBANKA_0307100.1-p1	0	14	S6(Phospho): 100
GIGINDVFIQMSSR	1xTMT6plex [N-Term]; 1xPhospho [S]	2	PBANKA_0307100		conserved Plasmodium protein, unknown function	0	0.48	0.08	0.44	-0.02	0.25	1	1	1	1	1		42
	Annotated Sequence	# Proteins	Master Protein Accessions			Protein Accessions	# Missed Cleavages	Ions Score	ptmRS: Best Site Probabilities
	gIGINDVFIQMSsR	1	PBANKA_0307100		conserved Plasmodium protein, unknown function	PBANKA_0307100.1-p1	0	42	S12(Phospho): 50; S13(Phospho): 50
	gIGINDVFIQMSsR	1	PBANKA_0307100		conserved Plasmodium protein, unknown function	PBANKA_0307100.1-p1	0	32	S12(Phospho): 50; S13(Phospho): 50
TQSFQNLDK	1xTMT6plex [K9]; 1xTMT6plex [N-Term]; 1xPhospho [S3(100)]	2	PBANKA_0307100		conserved Plasmodium protein, unknown function	0	0.11	-0.11	0.12	0.18	-0.41							31
	Annotated Sequence	# Proteins	Master Protein Accessions			Protein Accessions	# Missed Cleavages	Ions Score	ptmRS: Best Site Probabilities
	tQsFQNLDk	1	PBANKA_0307100		conserved Plasmodium protein, unknown function	PBANKA_0307100.1-p1	0	31	S3(Phospho): 100
	tQsFQNLDk	1	PBANKA_0307100		conserved Plasmodium protein, unknown function	PBANKA_0307100.1-p1	0	27	S3(Phospho): 100
TQSFQNLDKEHYILDPNIVQILK	2xTMT6plex [K9; K23]; 1xTMT6plex [N-Term]; 1xPhospho [S3(100)]	3	PBANKA_0307100		conserved Plasmodium protein, unknown function	1	-0.07	-0.01	-0.15	-0.08	-0.08	1	1	1	1	1		40
	Annotated Sequence	# Proteins	Master Protein Accessions			Protein Accessions	# Missed Cleavages	Ions Score	ptmRS: Best Site Probabilities
	tQsFQNLDkEHYILDPNIVQILk	1	PBANKA_0307100		conserved Plasmodium protein, unknown function	PBANKA_0307100.1-p1	1	40	S3(Phospho): 99.26
	tQsFQNLDkEHYILDPNIVQILk	1	PBANKA_0307100		conserved Plasmodium protein, unknown function	PBANKA_0307100.1-p1	1	34	S3(Phospho): 100
	tQsFQNLDkEHYILDPNIVQILk	1	PBANKA_0307100		conserved Plasmodium protein, unknown function	PBANKA_0307100.1-p1	1	16	S3(Phospho): 100
HMPTFGNK	1xTMT6plex [K8]; 1xTMT6plex [N-Term]; 1xPhospho [T4(100)]	2	PBANKA_0307100		conserved Plasmodium protein, unknown function	0	0.33	0.45	0.34	0.34	0.39	1	1	1	1	1		26
	Annotated Sequence	# Proteins	Master Protein Accessions			Protein Accessions	# Missed Cleavages	Ions Score	ptmRS: Best Site Probabilities
	hMPtFGNk	1	PBANKA_0307100		conserved Plasmodium protein, unknown function	PBANKA_0307100.1-p1	0	26	T4(Phospho): 100
	hMPtFGNk	1	PBANKA_0307100		conserved Plasmodium protein, unknown function	PBANKA_0307100.1-p1	0	26	T4(Phospho): 100
VFGLSGNR	1xTMT6plex [N-Term]; 1xPhospho [S5(100)]	2	PBANKA_0307800		conserved Plasmodium protein, unknown function	0	0.63	1.31	1.31	1.02	1.03	1	1	1	1	1		33
	Annotated Sequence	# Proteins	Master Protein Accessions			Protein Accessions	# Missed Cleavages	Ions Score	ptmRS: Best Site Probabilities
	vFGLsGNR	1	PBANKA_0307800		conserved Plasmodium protein, unknown function	PBANKA_0307800.1-p1	0	33	S5(Phospho): 100
	vFGLsGNR	1	PBANKA_0307800		conserved Plasmodium protein, unknown function	PBANKA_0307800.1-p1	0	25	S5(Phospho): 100
KFSNLNISLHR	1xTMT6plex [K1]; 1xTMT6plex [N-Term]; 1xPhospho [S3(100)]	3	PBANKA_0307800		conserved Plasmodium protein, unknown function	1	0.43	0.77	0.94	0.55	0.69	1	1	1	1	1		40
	Annotated Sequence	# Proteins	Master Protein Accessions			Protein Accessions	# Missed Cleavages	Ions Score	ptmRS: Best Site Probabilities
	kFsNLNISLHR	1	PBANKA_0307800		conserved Plasmodium protein, unknown function	PBANKA_0307800.1-p1	1	40	S3(Phospho): 100
	kFsNLNISLHR	1	PBANKA_0307800		conserved Plasmodium protein, unknown function	PBANKA_0307800.1-p1	1	29	S3(Phospho): 100
	kFsNLNISLHR	1	PBANKA_0307800		conserved Plasmodium protein, unknown function	PBANKA_0307800.1-p1	1	27	S3(Phospho): 100
YGSDKFK	2xTMT6plex [K5; K7]; 1xTMT6plex [N-Term]; 1xPhospho [S3(100)]	2	PBANKA_0307800		conserved Plasmodium protein, unknown function	1	0.69	0.79	0.89	0.71	0.85	1	1	1	1	1		32
	Annotated Sequence	# Proteins	Master Protein Accessions			Protein Accessions	# Missed Cleavages	Ions Score	ptmRS: Best Site Probabilities
	yGsDkFk	1	PBANKA_0307800		conserved Plasmodium protein, unknown function	PBANKA_0307800.1-p1	1	32	S3(Phospho): 100
	yGsDkFk	1	PBANKA_0307800		conserved Plasmodium protein, unknown function	PBANKA_0307800.1-p1	1	24	S3(Phospho): 100
EQKDTEVNLPESLNNTVK	2xTMT6plex [K3; K18]; 1xTMT6plex [N-Term]; 1xPhospho [S12(100)]	2	PBANKA_0307800		conserved Plasmodium protein, unknown function	1	-0.45	-0.33	-0.35	-0.44	-0.2	1	1	1	1	1		50
	Annotated Sequence	# Proteins	Master Protein Accessions			Protein Accessions	# Missed Cleavages	Ions Score	ptmRS: Best Site Probabilities
	eQkDTEVNLPEsLNNTVk	1	PBANKA_0307800		conserved Plasmodium protein, unknown function	PBANKA_0307800.1-p1	1	50	S12(Phospho): 100
	eQkDTEVNLPEsLNNTVk	1	PBANKA_0307800		conserved Plasmodium protein, unknown function	PBANKA_0307800.1-p1	1	43	S12(Phospho): 100
KFSNLNISLHR	1xTMT6plex [K1]; 1xTMT6plex [N-Term]; 2xPhospho [S3(100); S8(100)]	2	PBANKA_0307800		conserved Plasmodium protein, unknown function	1	0.4	0.74	0.85	0.43	0.49	1	0.990775	0.399975	1	1		24
	Annotated Sequence	# Proteins	Master Protein Accessions			Protein Accessions	# Missed Cleavages	Ions Score	ptmRS: Best Site Probabilities
	kFsNLNIsLHR	1	PBANKA_0307800		conserved Plasmodium protein, unknown function	PBANKA_0307800.1-p1	1	24	S3(Phospho): 100; S8(Phospho): 100
	kFsNLNIsLHR	1	PBANKA_0307800		conserved Plasmodium protein, unknown function	PBANKA_0307800.1-p1	1	14	S3(Phospho): 100; S8(Phospho): 100
DTEVNLPESLNNTVK	1xTMT6plex [K15]; 1xTMT6plex [N-Term]; 1xPhospho [S9(100)]	5	PBANKA_0307800		conserved Plasmodium protein, unknown function	0	-0.18	-0.23	-0.2	-0.22	-0.38	1	1	1	1	0.480091		51
	Annotated Sequence	# Proteins	Master Protein Accessions			Protein Accessions	# Missed Cleavages	Ions Score	ptmRS: Best Site Probabilities
	dTEVNLPEsLNNTVk	1	PBANKA_0307800		conserved Plasmodium protein, unknown function	PBANKA_0307800.1-p1	0	51	S9(Phospho): 100
	dTEVNLPEsLNNTVk	1	PBANKA_0307800		conserved Plasmodium protein, unknown function	PBANKA_0307800.1-p1	0	44	S9(Phospho): 100
	dTEVNLPEsLNNTVk	1	PBANKA_0307800		conserved Plasmodium protein, unknown function	PBANKA_0307800.1-p1	0	44	S9(Phospho): 100
	dTEVNLPEsLNNTVk	1	PBANKA_0307800		conserved Plasmodium protein, unknown function	PBANKA_0307800.1-p1	0	44	S9(Phospho): 100
	dTEVNLPEsLNNTVk	1	PBANKA_0307800		conserved Plasmodium protein, unknown function	PBANKA_0307800.1-p1	0	32	S9(Phospho): 100
TVISKNLNSYK	2xTMT6plex [K5; K11]; 1xTMT6plex [N-Term]; 1xPhospho [S4(100)]	1	PBANKA_0307800		conserved Plasmodium protein, unknown function	1	-0.14	0.16	0.13	0.31	0.2							14
	Annotated Sequence	# Proteins	Master Protein Accessions			Protein Accessions	# Missed Cleavages	Ions Score	ptmRS: Best Site Probabilities
	tVIskNLNSYk	1	PBANKA_0307800		conserved Plasmodium protein, unknown function	PBANKA_0307800.1-p1	1	14	S4(Phospho): 100
IVTSLNK	1xTMT6plex [K7]; 1xTMT6plex [N-Term]; 1xPhospho [T3(99.7)]	1	PBANKA_0307800		conserved Plasmodium protein, unknown function	0	0.99	-0.42	0.68	0.87	0.34							14
	Annotated Sequence	# Proteins	Master Protein Accessions			Protein Accessions	# Missed Cleavages	Ions Score	ptmRS: Best Site Probabilities
	iVtSLNk	1	PBANKA_0307800		conserved Plasmodium protein, unknown function	PBANKA_0307800.1-p1	0	14	T3(Phospho): 99.66
IVTSLNKIPSPLK	2xTMT6plex [K7; K13]; 1xTMT6plex [N-Term]; 1xPhospho [S4(99.5)]	2	PBANKA_0307800		conserved Plasmodium protein, unknown function	1	0.72	0.91	0.9	1.01	0.58							13
	Annotated Sequence	# Proteins	Master Protein Accessions			Protein Accessions	# Missed Cleavages	Ions Score	ptmRS: Best Site Probabilities
	iVTsLNkIPSPLk	1	PBANKA_0307800		conserved Plasmodium protein, unknown function	PBANKA_0307800.1-p1	1	13	T3(Phospho): 50; S4(Phospho): 50
	iVTsLNkIPSPLk	1	PBANKA_0307800		conserved Plasmodium protein, unknown function	PBANKA_0307800.1-p1	1	13	S4(Phospho): 99.46
FSNLNISLHR	1xTMT6plex [N-Term]; 1xPhospho [S2(100)]	4	PBANKA_0307800		conserved Plasmodium protein, unknown function	0	-0.06	0.25	0.1	0.22	0.1	1	1	1	1	1		39
	Annotated Sequence	# Proteins	Master Protein Accessions			Protein Accessions	# Missed Cleavages	Ions Score	ptmRS: Best Site Probabilities
	fsNLNISLHR	1	PBANKA_0307800		conserved Plasmodium protein, unknown function	PBANKA_0307800.1-p1	0	39	S2(Phospho): 100
	fSNLNIsLHR	1	PBANKA_0307800		conserved Plasmodium protein, unknown function	PBANKA_0307800.1-p1	0	37	S7(Phospho): 100
	fSNLNIsLHR	1	PBANKA_0307800		conserved Plasmodium protein, unknown function	PBANKA_0307800.1-p1	0	34	S7(Phospho): 100
	fsNLNISLHR	1	PBANKA_0307800		conserved Plasmodium protein, unknown function	PBANKA_0307800.1-p1	0	32	S2(Phospho): 100
VSLIDESDKNYSENK	2xTMT6plex [K9; K15]; 1xTMT6plex [N-Term]; 1xPhospho [S7(100)]	2	PBANKA_0309400		conserved Plasmodium protein, unknown function	1	-0.14	-0.54	-0.82	-0.53	-0.52							17
	Annotated Sequence	# Proteins	Master Protein Accessions			Protein Accessions	# Missed Cleavages	Ions Score	ptmRS: Best Site Probabilities
	vSLIDEsDkNYSENk	1	PBANKA_0309400		conserved Plasmodium protein, unknown function	PBANKA_0309400.1-p1	1	17	S7(Phospho): 100
	vSLIDEsDkNYSENk	1	PBANKA_0309400		conserved Plasmodium protein, unknown function	PBANKA_0309400.1-p1	1	15	S7(Phospho): 100
HFSNSNNFASYGNR	1xTMT6plex [N-Term]; 1xPhospho [S5(100)]	2	PBANKA_0309400		conserved Plasmodium protein, unknown function	0	-0.01	0.22	-0.36	0.13	-0.11							28
	Annotated Sequence	# Proteins	Master Protein Accessions			Protein Accessions	# Missed Cleavages	Ions Score	ptmRS: Best Site Probabilities
	hFSNsNNFASYGNR	1	PBANKA_0309400		conserved Plasmodium protein, unknown function	PBANKA_0309400.1-p1	0	28	S5(Phospho): 100
	hFSNsNNFASYGNR	1	PBANKA_0309400		conserved Plasmodium protein, unknown function	PBANKA_0309400.1-p1	0	27	S5(Phospho): 100
SLSDTNQIK	1xTMT6plex [K9]; 1xTMT6plex [N-Term]; 1xPhospho [S3(100)]	3	PBANKA_0309400		conserved Plasmodium protein, unknown function	0	0.02	0.28	0.19	0.11	0.17	1	1	1	1	1		33
	Annotated Sequence	# Proteins	Master Protein Accessions			Protein Accessions	# Missed Cleavages	Ions Score	ptmRS: Best Site Probabilities
	sLsDTNQIk	1	PBANKA_0309400		conserved Plasmodium protein, unknown function	PBANKA_0309400.1-p1	0	33	S3(Phospho): 100
	sLsDTNQIk	1	PBANKA_0309400		conserved Plasmodium protein, unknown function	PBANKA_0309400.1-p1	0	26	S3(Phospho): 100
	sLsDTNQIk	1	PBANKA_0309400		conserved Plasmodium protein, unknown function	PBANKA_0309400.1-p1	0	20	S3(Phospho): 100
ISNQSVISGDEYDYANNSK	1xTMT6plex [K19]; 1xTMT6plex [N-Term]; 1xPhospho [S8(99.5)]	2	PBANKA_0309400		conserved Plasmodium protein, unknown function	0											No Quan Values	50
	Annotated Sequence	# Proteins	Master Protein Accessions			Protein Accessions	# Missed Cleavages	Ions Score	ptmRS: Best Site Probabilities
	iSNQSVIsGDEYDYANNSk	1	PBANKA_0309400		conserved Plasmodium protein, unknown function	PBANKA_0309400.1-p1	0	50	S8(Phospho): 99.47
	iSNQSVIsGDEYDYANNSk	1	PBANKA_0309400		conserved Plasmodium protein, unknown function	PBANKA_0309400.1-p1	0	47	S8(Phospho): 99.49
FDAESHVNNESENDDINSK	1xTMT6plex [K19]; 1xTMT6plex [N-Term]; 1xPhospho [S11(100)]	2	PBANKA_0309400		conserved Plasmodium protein, unknown function	0	-0.16	-0.42	-0.37	-0.28	-0.26	1	1	1	1	1		67
	Annotated Sequence	# Proteins	Master Protein Accessions			Protein Accessions	# Missed Cleavages	Ions Score	ptmRS: Best Site Probabilities
	fDAESHVNNEsENDDINSk	1	PBANKA_0309400		conserved Plasmodium protein, unknown function	PBANKA_0309400.1-p1	0	67	S11(Phospho): 100
	fDAESHVNNEsENDDINSk	1	PBANKA_0309400		conserved Plasmodium protein, unknown function	PBANKA_0309400.1-p1	0	65	S11(Phospho): 100
LKENLSDIFINR	1xTMT6plex [K2]; 1xTMT6plex [N-Term]; 1xPhospho [S6(100)]	1	PBANKA_0310500		conserved Plasmodium protein, unknown function	1	0.29	0.22	0.18	0.36	0.21							30
	Annotated Sequence	# Proteins	Master Protein Accessions			Protein Accessions	# Missed Cleavages	Ions Score	ptmRS: Best Site Probabilities
	lkENLsDIFINR	1	PBANKA_0310500		conserved Plasmodium protein, unknown function	PBANKA_0310500.1-p1	1	30	S6(Phospho): 100
TNSIEGNYLNVNYLFK	1xTMT6plex [K16]; 1xTMT6plex [N-Term]; 1xPhospho [S3(99.8)]	2	PBANKA_0310500		conserved Plasmodium protein, unknown function	0	0.52	0.35	0.46	0.35	0.57	1	1	1	1	1		58
	Annotated Sequence	# Proteins	Master Protein Accessions			Protein Accessions	# Missed Cleavages	Ions Score	ptmRS: Best Site Probabilities
	tNsIEGNYLNVNYLFk	1	PBANKA_0310500		conserved Plasmodium protein, unknown function	PBANKA_0310500.1-p1	0	58	S3(Phospho): 99.77
	tNsIEGNYLNVNYLFk	1	PBANKA_0310500		conserved Plasmodium protein, unknown function	PBANKA_0310500.1-p1	0	37	S3(Phospho): 99.68
NLHTNYIDNTTK	1xTMT6plex [K12]; 1xTMT6plex [N-Term]; 1xPhospho [T4(100)]	2	PBANKA_0310500		conserved Plasmodium protein, unknown function	0	-0.27	0.13	0.18	0.13	0.26	1	1	1	1	1		41
	Annotated Sequence	# Proteins	Master Protein Accessions			Protein Accessions	# Missed Cleavages	Ions Score	ptmRS: Best Site Probabilities
	nLHtNYIDNTTk	1	PBANKA_0310500		conserved Plasmodium protein, unknown function	PBANKA_0310500.1-p1	0	41	T4(Phospho): 100
	nLHtNYIDNTTk	1	PBANKA_0310500		conserved Plasmodium protein, unknown function	PBANKA_0310500.1-p1	0	25	T4(Phospho): 100
NCGSENSGSEHVSILEK	1xCarbamidomethyl [C2]; 1xTMT6plex [K17]; 1xTMT6plex [N-Term]; 1xPhospho [S7(100)]	1	PBANKA_0310500		conserved Plasmodium protein, unknown function	0	0.14	-0.25	-0.46	-0.12	-0.2							41
	Annotated Sequence	# Proteins	Master Protein Accessions			Protein Accessions	# Missed Cleavages	Ions Score	ptmRS: Best Site Probabilities
	ncGSENsGSEHVSILEk	1	PBANKA_0310500		conserved Plasmodium protein, unknown function	PBANKA_0310500.1-p1	0	41	S7(Phospho): 100
NSGNILNTNLISKEVGHK	2xTMT6plex [K13; K18]; 1xTMT6plex [N-Term]; 1xPhospho [S12(100)]	3	PBANKA_0310500		conserved Plasmodium protein, unknown function	1	0.35	0.18	0.4	0.27	0.08	1	1	1	1	1		47
	Annotated Sequence	# Proteins	Master Protein Accessions			Protein Accessions	# Missed Cleavages	Ions Score	ptmRS: Best Site Probabilities
	nSGNILNTNLIskEVGHk	1	PBANKA_0310500		conserved Plasmodium protein, unknown function	PBANKA_0310500.1-p1	1	47	S12(Phospho): 100
	nSGNILNTNLIskEVGHk	1	PBANKA_0310500		conserved Plasmodium protein, unknown function	PBANKA_0310500.1-p1	1	42	S12(Phospho): 100
	nSGNILNTNLIskEVGHk	1	PBANKA_0310500		conserved Plasmodium protein, unknown function	PBANKA_0310500.1-p1	1	31	S12(Phospho): 100
NIYNKIDTAIQTNTSK	2xTMT6plex [K5; K16]; 1xTMT6plex [N-Term]; 1xPhospho [T8(100)]	2	PBANKA_0310500		conserved Plasmodium protein, unknown function	1	0.05	0.04	0.12	-0.26	-0.1	1	1	1	1	1		63
	Annotated Sequence	# Proteins	Master Protein Accessions			Protein Accessions	# Missed Cleavages	Ions Score	ptmRS: Best Site Probabilities
	nIYNkIDtAIQTNTSk	1	PBANKA_0310500		conserved Plasmodium protein, unknown function	PBANKA_0310500.1-p1	1	63	T8(Phospho): 100
	nIYNkIDtAIQTNTSk	1	PBANKA_0310500		conserved Plasmodium protein, unknown function	PBANKA_0310500.1-p1	1	36	T8(Phospho): 100
KWNEHDNIDSNENINLTLDELESNENNNICK	1xCarbamidomethyl [C30]; 2xTMT6plex [K1; K31]; 1xTMT6plex [N-Term]; 1xPhospho [S10(100)]	1	PBANKA_0310500		conserved Plasmodium protein, unknown function	1	-0.05	0.02	-0.12	-0.17	-0.06							62
	Annotated Sequence	# Proteins	Master Protein Accessions			Protein Accessions	# Missed Cleavages	Ions Score	ptmRS: Best Site Probabilities
	kWNEHDNIDsNENINLTLDELESNENNNIck	1	PBANKA_0310500		conserved Plasmodium protein, unknown function	PBANKA_0310500.1-p1	1	62	S10(Phospho): 100
IDTAIQTNTSK	1xTMT6plex [K11]; 1xTMT6plex [N-Term]; 1xPhospho [T3(100)]	4	PBANKA_0310500		conserved Plasmodium protein, unknown function	0	0.31	0.23	0.19	0.13	0.18	1	1	1	1	1		66
	Annotated Sequence	# Proteins	Master Protein Accessions			Protein Accessions	# Missed Cleavages	Ions Score	ptmRS: Best Site Probabilities
	iDtAIQTNTSk	1	PBANKA_0310500		conserved Plasmodium protein, unknown function	PBANKA_0310500.1-p1	0	66	T3(Phospho): 100
	iDtAIQTNTSk	1	PBANKA_0310500		conserved Plasmodium protein, unknown function	PBANKA_0310500.1-p1	0	63	T3(Phospho): 100
	iDtAIQTNTSk	1	PBANKA_0310500		conserved Plasmodium protein, unknown function	PBANKA_0310500.1-p1	0	50	T3(Phospho): 100
	iDtAIQTNTSk	1	PBANKA_0310500		conserved Plasmodium protein, unknown function	PBANKA_0310500.1-p1	0	40	T3(Phospho): 100
YINEIEIVKSEYEQIK	2xTMT6plex [K9; K16]; 1xTMT6plex [N-Term]; 1xPhospho [S10(100)]	3	PBANKA_0310500		conserved Plasmodium protein, unknown function	1	0.12	-0.21	-0.27	-0.12	-0.02	1	1	1	1	1		43
	Annotated Sequence	# Proteins	Master Protein Accessions			Protein Accessions	# Missed Cleavages	Ions Score	ptmRS: Best Site Probabilities
	yINEIEIVksEYEQIk	1	PBANKA_0310500		conserved Plasmodium protein, unknown function	PBANKA_0310500.1-p1	1	43	S10(Phospho): 100
	yINEIEIVksEYEQIk	1	PBANKA_0310500		conserved Plasmodium protein, unknown function	PBANKA_0310500.1-p1	1	25	S10(Phospho): 100
	yINEIEIVkSEyEQIk	1	PBANKA_0310500		conserved Plasmodium protein, unknown function	PBANKA_0310500.1-p1	1	22	S10(Phospho): 100
SNSQNIPYIK	1xTMT6plex [K10]; 1xTMT6plex [N-Term]; 1xPhospho [S3(100)]	4	PBANKA_0311600		conserved Plasmodium protein, unknown function	0	-0.15	-0.17	-0.02	-0.11	-0.06	1	1	1	1	1		43
	Annotated Sequence	# Proteins	Master Protein Accessions			Protein Accessions	# Missed Cleavages	Ions Score	ptmRS: Best Site Probabilities
	sNsQNIPYIk	1	PBANKA_0311600		conserved Plasmodium protein, unknown function	PBANKA_0311600.1-p1	0	43	S3(Phospho): 100
	sNsQNIPYIk	1	PBANKA_0311600		conserved Plasmodium protein, unknown function	PBANKA_0311600.1-p1	0	41	S3(Phospho): 100
	sNsQNIPYIk	1	PBANKA_0311600		conserved Plasmodium protein, unknown function	PBANKA_0311600.1-p1	0	20	S3(Phospho): 100
	sNsQNIPYIk	1	PBANKA_0311600		conserved Plasmodium protein, unknown function	PBANKA_0311600.1-p1	0	17	S3(Phospho): 99.69
ITAFSDELVFDPEVPNNQK	1xTMT6plex [K19]; 1xTMT6plex [N-Term]; 1xPhospho [S5(100)]	2	PBANKA_0311600		conserved Plasmodium protein, unknown function	0	-0.19	-0.43	-0.31	-0.37	-0.36	1	1	1	1	1		56
	Annotated Sequence	# Proteins	Master Protein Accessions			Protein Accessions	# Missed Cleavages	Ions Score	ptmRS: Best Site Probabilities
	iTAFsDELVFDPEVPNNQk	1	PBANKA_0311600		conserved Plasmodium protein, unknown function	PBANKA_0311600.1-p1	0	56	S5(Phospho): 100
	iTAFsDELVFDPEVPNNQk	1	PBANKA_0311600		conserved Plasmodium protein, unknown function	PBANKA_0311600.1-p1	0	52	S5(Phospho): 100
GENILTGKNSGTIIYNENK	2xTMT6plex [K8; K19]; 1xTMT6plex [N-Term]; 1xPhospho [T6(100)]	1	PBANKA_0311600		conserved Plasmodium protein, unknown function	1	0.53	0.25	0.67	0.18	0.34							17
	Annotated Sequence	# Proteins	Master Protein Accessions			Protein Accessions	# Missed Cleavages	Ions Score	ptmRS: Best Site Probabilities
	gENILTGkNSGtIIYNENk	1	PBANKA_0311600		conserved Plasmodium protein, unknown function	PBANKA_0311600.1-p1	1	17	T6(Phospho): 100
LQSLNSVSYLYK	1xTMT6plex [K12]; 1xTMT6plex [N-Term]; 2xPhospho [S3(100); S6(100)]	2	PBANKA_0311600		conserved Plasmodium protein, unknown function	0	0.2	0.38	0.76	0.17	0.66							28
	Annotated Sequence	# Proteins	Master Protein Accessions			Protein Accessions	# Missed Cleavages	Ions Score	ptmRS: Best Site Probabilities
	lQsLNsVSYLYk	1	PBANKA_0311600		conserved Plasmodium protein, unknown function	PBANKA_0311600.1-p1	0	28	S3(Phospho): 100; S6(Phospho): 100
	lQsLNsVSYLYk	1	PBANKA_0311600		conserved Plasmodium protein, unknown function	PBANKA_0311600.1-p1	0	20	S3(Phospho): 100; S6(Phospho): 100
LQSLNSVSYLYK	1xTMT6plex [K12]; 1xTMT6plex [N-Term]; 1xPhospho [S3(100)]	4	PBANKA_0311600		conserved Plasmodium protein, unknown function	0	-0.34	-0.71	-0.69	-0.63	-0.61	1	1	1	1	1		63
	Annotated Sequence	# Proteins	Master Protein Accessions			Protein Accessions	# Missed Cleavages	Ions Score	ptmRS: Best Site Probabilities
	lQsLNSVSYLYk	1	PBANKA_0311600		conserved Plasmodium protein, unknown function	PBANKA_0311600.1-p1	0	63	S3(Phospho): 100
	lQsLNSVSYLYk	1	PBANKA_0311600		conserved Plasmodium protein, unknown function	PBANKA_0311600.1-p1	0	62	S3(Phospho): 100
	lQsLNSVSYLYk	1	PBANKA_0311600		conserved Plasmodium protein, unknown function	PBANKA_0311600.1-p1	0	46	S3(Phospho): 100
	lQsLNSVSYLYk	1	PBANKA_0311600		conserved Plasmodium protein, unknown function	PBANKA_0311600.1-p1	0	39	S3(Phospho): 100
SNTPPLNPVDTSLSGK	1xTMT6plex [K16]; 1xTMT6plex [N-Term]; 1xPhospho [T3(99.7)]	5	PBANKA_0311900		RING zinc finger protein, putative	0	-0.17	-0.11	-0.14	-0.16	-0.13	1	1	1	1	1		78
	Annotated Sequence	# Proteins	Master Protein Accessions			Protein Accessions	# Missed Cleavages	Ions Score	ptmRS: Best Site Probabilities
	sNtPPLNPVDTSLSGk	1	PBANKA_0311900		RING zinc finger protein, putative	PBANKA_0311900.1-p1	0	78	T3(Phospho): 100
	sNtPPLNPVDTSLSGk	1	PBANKA_0311900		RING zinc finger protein, putative	PBANKA_0311900.1-p1	0	74	T3(Phospho): 100
	sNtPPLNPVDTSLSGk	1	PBANKA_0311900		RING zinc finger protein, putative	PBANKA_0311900.1-p1	0	51	T3(Phospho): 100
	sNtPPLNPVDTSLSGk	1	PBANKA_0311900		RING zinc finger protein, putative	PBANKA_0311900.1-p1	0	45	T3(Phospho): 100
	sNtPPLNPVDTSLSGk	1	PBANKA_0311900		RING zinc finger protein, putative	PBANKA_0311900.1-p1	0	44	T3(Phospho): 99.68
TNSNQLYDLPTQGPNINVQR	1xTMT6plex [N-Term]; 1xPhospho [S3(100)]	4	PBANKA_0311900		RING zinc finger protein, putative	0	-0.19	-0.28	-0.31	-0.1	-0.22	1	1	1	1	1		51
	Annotated Sequence	# Proteins	Master Protein Accessions			Protein Accessions	# Missed Cleavages	Ions Score	ptmRS: Best Site Probabilities
	tNsNQLYDLPTQGPNINVQR	1	PBANKA_0311900		RING zinc finger protein, putative	PBANKA_0311900.1-p1	0	51	S3(Phospho): 100
	tNsNQLYDLPTQGPNINVQR	1	PBANKA_0311900		RING zinc finger protein, putative	PBANKA_0311900.1-p1	0	43	S3(Phospho): 100
	tNsNQLYDLPTQGPNINVQR	1	PBANKA_0311900		RING zinc finger protein, putative	PBANKA_0311900.1-p1	0	30	S3(Phospho): 100
	tNsNQLYDLPTQGPNINVQR	1	PBANKA_0311900		RING zinc finger protein, putative	PBANKA_0311900.1-p1	0	24	S3(Phospho): 99.99
AIQFNSPIISR	1xTMT6plex [N-Term]; 1xPhospho [S6(100)]	2	PBANKA_0311900		RING zinc finger protein, putative	0	0.18	0.21	-0.02	0.35	0.03							36
	Annotated Sequence	# Proteins	Master Protein Accessions			Protein Accessions	# Missed Cleavages	Ions Score	ptmRS: Best Site Probabilities
	aIQFNsPIISR	1	PBANKA_0311900		RING zinc finger protein, putative	PBANKA_0311900.1-p1	0	36	S6(Phospho): 100
	aIQFNsPIISR	1	PBANKA_0311900		RING zinc finger protein, putative	PBANKA_0311900.1-p1	0	29	S6(Phospho): 100
SDSTNSNLIK	1xTMT6plex [K10]; 1xTMT6plex [N-Term]; 1xPhospho [S3(100)]	3	PBANKA_0312100		conserved Plasmodium protein, unknown function	0	-0.05	-0.53	-0.71	-0.45	-0.45	1	1	1	1	1		51
	Annotated Sequence	# Proteins	Master Protein Accessions			Protein Accessions	# Missed Cleavages	Ions Score	ptmRS: Best Site Probabilities
	sDsTNSNLIk	1	PBANKA_0312100		conserved Plasmodium protein, unknown function	PBANKA_0312100.1-p1	0	51	S3(Phospho): 100
	sDsTNSNLIk	1	PBANKA_0312100		conserved Plasmodium protein, unknown function	PBANKA_0312100.1-p1	0	42	S3(Phospho): 100
	sDsTNSNLIk	1	PBANKA_0312100		conserved Plasmodium protein, unknown function	PBANKA_0312100.1-p1	0	20	S3(Phospho): 99.27
RIDSNNNNK	1xTMT6plex [K9]; 1xTMT6plex [N-Term]; 1xPhospho [S4(100)]	2	PBANKA_0312100		conserved Plasmodium protein, unknown function	1	-0.15	-0.44	-0.68	0.53	0.5	1	1	1	1	1		22
	Annotated Sequence	# Proteins	Master Protein Accessions			Protein Accessions	# Missed Cleavages	Ions Score	ptmRS: Best Site Probabilities
	rIDsNNNNk	1	PBANKA_0312100		conserved Plasmodium protein, unknown function	PBANKA_0312100.1-p1	1	22	S4(Phospho): 100
	rIDsNNNNk	1	PBANKA_0312100		conserved Plasmodium protein, unknown function	PBANKA_0312100.1-p1	1	14	S4(Phospho): 100
NVINPLNSDYYK	1xTMT6plex [K12]; 1xTMT6plex [N-Term]; 1xPhospho [S8(100)]	2	PBANKA_0312100		conserved Plasmodium protein, unknown function	0	0.21	0.53	0.26	0.16	0.22	1	1	1	1	1		52
	Annotated Sequence	# Proteins	Master Protein Accessions			Protein Accessions	# Missed Cleavages	Ions Score	ptmRS: Best Site Probabilities
	nVINPLNsDYYk	1	PBANKA_0312100		conserved Plasmodium protein, unknown function	PBANKA_0312100.1-p1	0	52	S8(Phospho): 100
	nVINPLNsDYYk	1	PBANKA_0312100		conserved Plasmodium protein, unknown function	PBANKA_0312100.1-p1	0	48	S8(Phospho): 100
YFPDIFDGSSSEIETNEIK	1xTMT6plex [K19]; 1xTMT6plex [N-Term]; 2xPhospho [S9(99.6); S/T/Y]	1	PBANKA_0312100		conserved Plasmodium protein, unknown function	0	-0.3	-0.16	-0.96	-0.34	-0.64							34
	Annotated Sequence	# Proteins	Master Protein Accessions			Protein Accessions	# Missed Cleavages	Ions Score	ptmRS: Best Site Probabilities
	yFPDIFDGsSsEIETNEIk	1	PBANKA_0312100		conserved Plasmodium protein, unknown function	PBANKA_0312100.1-p1	0	34	S9(Phospho): 99.55; S10(Phospho): 50; S11(Phospho): 50
YFPDIFDGSSSEIETNEIK	1xTMT6plex [K19]; 1xTMT6plex [N-Term]; 1xPhospho [S9(99.5)]	2	PBANKA_0312100		conserved Plasmodium protein, unknown function	0	0.01	-0.21	-0.06	-0.1	-0.13	1	1	1	1	1		50
	Annotated Sequence	# Proteins	Master Protein Accessions			Protein Accessions	# Missed Cleavages	Ions Score	ptmRS: Best Site Probabilities
	yFPDIFDGsSSEIETNEIk	1	PBANKA_0312100		conserved Plasmodium protein, unknown function	PBANKA_0312100.1-p1	0	50	S9(Phospho): 99.52
	yFPDIFDGsSSEIETNEIk	1	PBANKA_0312100		conserved Plasmodium protein, unknown function	PBANKA_0312100.1-p1	0	31	S9(Phospho): 98.9
TNSPNESFEQNATEQNKYNQADVENK	2xTMT6plex [K17; K26]; 1xTMT6plex [N-Term]; 1xPhospho [S3(100)]	1	PBANKA_0312100		conserved Plasmodium protein, unknown function	1	-0.5	-0.53	-0.86	-0.41	-0.45							22
	Annotated Sequence	# Proteins	Master Protein Accessions			Protein Accessions	# Missed Cleavages	Ions Score	ptmRS: Best Site Probabilities
	tNsPNESFEQNATEQNkYNQADVENk	1	PBANKA_0312100		conserved Plasmodium protein, unknown function	PBANKA_0312100.1-p1	1	22	S3(Phospho): 99.99
YTSASSSVGSDTSSR	1xTMT6plex [N-Term]; 1xPhospho [S6(99.6)]	3	PBANKA_0312400	RPB2	DNA-directed RNA polymerase II subunit RPB2, putative	0	-0.1	-0.21	-0.59	-0.14	-0.37	1	1	1	1	1		39
	Annotated Sequence	# Proteins	Master Protein Accessions			Protein Accessions	# Missed Cleavages	Ions Score	ptmRS: Best Site Probabilities
	yTSASSsVGSDTSSR	1	PBANKA_0312400	RPB2	DNA-directed RNA polymerase II subunit RPB2, putative	PBANKA_0312400.1-p1	0	39	S6(Phospho): 99.63
	yTSASSSVGsDTSSR	1	PBANKA_0312400	RPB2	DNA-directed RNA polymerase II subunit RPB2, putative	PBANKA_0312400.1-p1	0	32	S10(Phospho): 99.99
	yTSASSsVGSDTSSR	1	PBANKA_0312400	RPB2	DNA-directed RNA polymerase II subunit RPB2, putative	PBANKA_0312400.1-p1	0	19	S6(Phospho): 49.88; S7(Phospho): 49.88
RLNTPLGR	1xTMT6plex [N-Term]; 1xPhospho [T4(100)]	2	PBANKA_0312400	RPB2	DNA-directed RNA polymerase II subunit RPB2, putative	1	0.15	0.02	0.22	0.19	0.09	1	1	1	1	1		33
	Annotated Sequence	# Proteins	Master Protein Accessions			Protein Accessions	# Missed Cleavages	Ions Score	ptmRS: Best Site Probabilities
	rLNtPLGR	1	PBANKA_0312400	RPB2	DNA-directed RNA polymerase II subunit RPB2, putative	PBANKA_0312400.1-p1	1	33	T4(Phospho): 100
	rLNtPLGR	1	PBANKA_0312400	RPB2	DNA-directed RNA polymerase II subunit RPB2, putative	PBANKA_0312400.1-p1	1	28	T4(Phospho): 100
LLSFTPENEFK	1xTMT6plex [K11]; 1xTMT6plex [N-Term]; 1xPhospho [S3(100)]	2	PBANKA_0312500	ORC5	origin recognition complex subunit 5, putative	0	0.46	0.17	0.19	0.49	0.54							28
	Annotated Sequence	# Proteins	Master Protein Accessions			Protein Accessions	# Missed Cleavages	Ions Score	ptmRS: Best Site Probabilities
	lLsFTPENEFk	1	PBANKA_0312500	ORC5	origin recognition complex subunit 5, putative	PBANKA_0312500.1-p1	0	28	S3(Phospho): 100
	lLsFTPENEFk	1	PBANKA_0312500	ORC5	origin recognition complex subunit 5, putative	PBANKA_0312500.1-p1	0	27	S3(Phospho): 100
NYTDYQNEVLNNKNSR	1xTMT6plex [K13]; 1xTMT6plex [N-Term]; 1xPhospho [S15(100)]	1	PBANKA_0312500	ORC5	origin recognition complex subunit 5, putative	1	0.01	0.12	0.03	-0.02	0.02							16
	Annotated Sequence	# Proteins	Master Protein Accessions			Protein Accessions	# Missed Cleavages	Ions Score	ptmRS: Best Site Probabilities
	nYTDYQNEVLNNkNsR	1	PBANKA_0312500	ORC5	origin recognition complex subunit 5, putative	PBANKA_0312500.1-p1	1	16	S15(Phospho): 100
MDSQENKLLNELNELLSK	2xTMT6plex [K7; K18]; 1xTMT6plex [N-Term]; 1xPhospho [S3(100)]	1	PBANKA_0313600		conserved Plasmodium protein, unknown function	1	0.02	-0.4	-0.57	-0.33	-0.19							31
	Annotated Sequence	# Proteins	Master Protein Accessions			Protein Accessions	# Missed Cleavages	Ions Score	ptmRS: Best Site Probabilities
	mDsQENkLLNELNELLSk	1	PBANKA_0313600		conserved Plasmodium protein, unknown function	PBANKA_0313600.1-p1	1	31	S3(Phospho): 100
SGQNEISPK	1xTMT6plex [K9]; 1xTMT6plex [N-Term]; 1xPhospho [S7(100)]	2	PBANKA_0313600		conserved Plasmodium protein, unknown function	0	0.25	-0.19	-0.19	0.08	0.05	1	1	1	1	1		32
	Annotated Sequence	# Proteins	Master Protein Accessions			Protein Accessions	# Missed Cleavages	Ions Score	ptmRS: Best Site Probabilities
	sGQNEIsPk	1	PBANKA_0313600		conserved Plasmodium protein, unknown function	PBANKA_0313600.1-p1	0	32	S7(Phospho): 100
	sGQNEIsPk	1	PBANKA_0313600		conserved Plasmodium protein, unknown function	PBANKA_0313600.1-p1	0	31	S7(Phospho): 100
MDSQENKLLNELNELLSK	1xOxidation [M1]; 2xTMT6plex [K7; K18]; 1xTMT6plex [N-Term]; 1xPhospho [S3(100)]	2	PBANKA_0313600		conserved Plasmodium protein, unknown function	1	-0.09	-0.16	-0.36	0.04	-0.26							35
	Annotated Sequence	# Proteins	Master Protein Accessions			Protein Accessions	# Missed Cleavages	Ions Score	ptmRS: Best Site Probabilities
	mDsQENkLLNELNELLSk	1	PBANKA_0313600		conserved Plasmodium protein, unknown function	PBANKA_0313600.1-p1	1	35	S3(Phospho): 100
	mDsQENkLLNELNELLSk	1	PBANKA_0313600		conserved Plasmodium protein, unknown function	PBANKA_0313600.1-p1	1	14	S3(Phospho): 100
ENNLSNLELNVLK	1xTMT6plex [K13]; 1xTMT6plex [N-Term]; 1xPhospho [S5(100)]	2	PBANKA_0313600		conserved Plasmodium protein, unknown function	0	0.24	0.09	0.1	0.29	0.43							23
	Annotated Sequence	# Proteins	Master Protein Accessions			Protein Accessions	# Missed Cleavages	Ions Score	ptmRS: Best Site Probabilities
	eNNLsNLELNVLk	1	PBANKA_0313600		conserved Plasmodium protein, unknown function	PBANKA_0313600.1-p1	0	23	S5(Phospho): 100
	eNNLsNLELNVLk	1	PBANKA_0313600		conserved Plasmodium protein, unknown function	PBANKA_0313600.1-p1	0	13	S5(Phospho): 100
REDTNDGEEIAINPGMYVR	1xTMT6plex [N-Term]; 1xPhospho [T4(100)]	2	PBANKA_0314200	CDPK1	calcium-dependent protein kinase 1	1	-0.1	-0.25	-0.38	-0.4	-0.09	1	1	1	1	1		22
	Annotated Sequence	# Proteins	Master Protein Accessions			Protein Accessions	# Missed Cleavages	Ions Score	ptmRS: Best Site Probabilities
	rEDtNDGEEIAINPGMYVR	1	PBANKA_0314200	CDPK1	calcium-dependent protein kinase 1	PBANKA_0314200.1-p1	1	22	T4(Phospho): 100
	rEDtNDGEEIAINPGMYVR	1	PBANKA_0314200	CDPK1	calcium-dependent protein kinase 1	PBANKA_0314200.1-p1	1	21	T4(Phospho): 100
IVDFGLSSFFSK	1xTMT6plex [K12]; 1xTMT6plex [N-Term]; 1xPhospho [S8(100)]	4	PBANKA_0314200	CDPK1	calcium-dependent protein kinase 1	0	0.32	0.63	0.59	0.58	0.69	1	1	1	1	1		61
	Annotated Sequence	# Proteins	Master Protein Accessions			Protein Accessions	# Missed Cleavages	Ions Score	ptmRS: Best Site Probabilities
	iVDFGLSsFFSk	1	PBANKA_0314200	CDPK1	calcium-dependent protein kinase 1	PBANKA_0314200.1-p1	0	61	S8(Phospho): 99.65
	iVDFGLSsFFSk	1	PBANKA_0314200	CDPK1	calcium-dependent protein kinase 1	PBANKA_0314200.1-p1	0	55	S8(Phospho): 100
	iVDFGLSsFFSk	1	PBANKA_0314200	CDPK1	calcium-dependent protein kinase 1	PBANKA_0314200.1-p1	0	41	S8(Phospho): 100
	iVDFGLSsFFSk	1	PBANKA_0314200	CDPK1	calcium-dependent protein kinase 1	PBANKA_0314200.1-p1	0	37	S8(Phospho): 100
REDTNDGEEIAINPGMYVR	1xOxidation [M16]; 1xTMT6plex [N-Term]; 1xPhospho [T4(100)]	1	PBANKA_0314200	CDPK1	calcium-dependent protein kinase 1	1											No Quan Values	38
	Annotated Sequence	# Proteins	Master Protein Accessions			Protein Accessions	# Missed Cleavages	Ions Score	ptmRS: Best Site Probabilities
	rEDtNDGEEIAINPGmYVR	1	PBANKA_0314200	CDPK1	calcium-dependent protein kinase 1	PBANKA_0314200.1-p1	1	38	T4(Phospho): 100
IGESYFK	1xTMT6plex [K7]; 1xTMT6plex [N-Term]; 1xPhospho [S4(100)]	2	PBANKA_0314200	CDPK1	calcium-dependent protein kinase 1	0	0.19	0.56	0.83	0.51	0.38	1	1	0.134232	1	1		15
	Annotated Sequence	# Proteins	Master Protein Accessions			Protein Accessions	# Missed Cleavages	Ions Score	ptmRS: Best Site Probabilities
	iGEsYFk	1	PBANKA_0314200	CDPK1	calcium-dependent protein kinase 1	PBANKA_0314200.1-p1	0	15	S4(Phospho): 100
	iGEsYFk	1	PBANKA_0314200	CDPK1	calcium-dependent protein kinase 1	PBANKA_0314200.1-p1	0	14	S4(Phospho): 100
IVDFGLSSFFSKDYK	2xTMT6plex [K12; K15]; 1xTMT6plex [N-Term]; 1xPhospho [S11(100)]	1	PBANKA_0314200	CDPK1	calcium-dependent protein kinase 1	1	0.09	0.58	0.35	-0.29	-0.02							28
	Annotated Sequence	# Proteins	Master Protein Accessions			Protein Accessions	# Missed Cleavages	Ions Score	ptmRS: Best Site Probabilities
	iVDFGLSsFFSkDYk	1	PBANKA_0314200	CDPK1	calcium-dependent protein kinase 1	PBANKA_0314200.1-p1	1	28	S11(Phospho): 100
TLCGALSNMR	1xCarbamidomethyl [C3]; 1xTMT6plex [N-Term]; 1xPhospho [S7(100)]	2	PBANKA_0314200	CDPK1	calcium-dependent protein kinase 1	0	0.4	0.39	0.45	0.31	0.59	1	1	1	1	1		34
	Annotated Sequence	# Proteins	Master Protein Accessions			Protein Accessions	# Missed Cleavages	Ions Score	ptmRS: Best Site Probabilities
	tLcGALsNMR	1	PBANKA_0314200	CDPK1	calcium-dependent protein kinase 1	PBANKA_0314200.1-p1	0	34	S7(Phospho): 100
	tLcGALsNMR	1	PBANKA_0314200	CDPK1	calcium-dependent protein kinase 1	PBANKA_0314200.1-p1	0	32	S7(Phospho): 100
VNHVNSK	1xTMT6plex [K7]; 1xTMT6plex [N-Term]; 1xPhospho [S6(100)]	4	PBANKA_0314200	CDPK1	calcium-dependent protein kinase 1	0	0.49	0.21	-0.06	1.34	1.17	1	1	1	1	1		28
	Annotated Sequence	# Proteins	Master Protein Accessions			Protein Accessions	# Missed Cleavages	Ions Score	ptmRS: Best Site Probabilities
	vNHVNsk	1	PBANKA_0314200	CDPK1	calcium-dependent protein kinase 1	PBANKA_0314200.1-p1	0	28	S6(Phospho): 100
	vNHVNsk	1	PBANKA_0314200	CDPK1	calcium-dependent protein kinase 1	PBANKA_0314200.1-p1	0	25	S6(Phospho): 100
	vNHVNsk	1	PBANKA_0314200	CDPK1	calcium-dependent protein kinase 1	PBANKA_0314200.1-p1	0	21	S6(Phospho): 100
	vNHVNsk	1	PBANKA_0314200	CDPK1	calcium-dependent protein kinase 1	PBANKA_0314200.1-p1	0	21	S6(Phospho): 100
GNKVNHVNSK	2xTMT6plex [K3; K10]; 1xTMT6plex [N-Term]; 1xPhospho [S9(100)]	1	PBANKA_0314200	CDPK1	calcium-dependent protein kinase 1	1	-0.11	-0.14	-0.09	-0.01	0.71							14
	Annotated Sequence	# Proteins	Master Protein Accessions			Protein Accessions	# Missed Cleavages	Ions Score	ptmRS: Best Site Probabilities
	gNkVNHVNsk	1	PBANKA_0314200	CDPK1	calcium-dependent protein kinase 1	PBANKA_0314200.1-p1	1	14	S9(Phospho): 100
KLGSGAYGEVLLCK	1xCarbamidomethyl [C13]; 2xTMT6plex [K1; K14]; 1xTMT6plex [N-Term]; 1xPhospho [S4(100)]	9	PBANKA_0314200	CDPK1	calcium-dependent protein kinase 1	1	0.09	0.37	0.3	0.25	0.35	1	1	1	1	1		67
	Annotated Sequence	# Proteins	Master Protein Accessions			Protein Accessions	# Missed Cleavages	Ions Score	ptmRS: Best Site Probabilities
	kLGsGAYGEVLLck	1	PBANKA_0314200	CDPK1	calcium-dependent protein kinase 1	PBANKA_0314200.1-p1	1	67	S4(Phospho): 100
	kLGsGAYGEVLLck	1	PBANKA_0314200	CDPK1	calcium-dependent protein kinase 1	PBANKA_0314200.1-p1	1	59	S4(Phospho): 100
	kLGsGAYGEVLLck	1	PBANKA_0314200	CDPK1	calcium-dependent protein kinase 1	PBANKA_0314200.1-p1	1	54	S4(Phospho): 100
	kLGsGAYGEVLLck	1	PBANKA_0314200	CDPK1	calcium-dependent protein kinase 1	PBANKA_0314200.1-p1	1	53	S4(Phospho): 100
	kLGsGAYGEVLLck	1	PBANKA_0314200	CDPK1	calcium-dependent protein kinase 1	PBANKA_0314200.1-p1	1	37	S4(Phospho): 100
	kLGsGAYGEVLLck	1	PBANKA_0314200	CDPK1	calcium-dependent protein kinase 1	PBANKA_0314200.1-p1	1	37	S4(Phospho): 100
	kLGsGAYGEVLLck	1	PBANKA_0314200	CDPK1	calcium-dependent protein kinase 1	PBANKA_0314200.1-p1	1	31	S4(Phospho): 100
	kLGsGAYGEVLLck	1	PBANKA_0314200	CDPK1	calcium-dependent protein kinase 1	PBANKA_0314200.1-p1	1	29	S4(Phospho): 100
	kLGsGAYGEVLLck	1	PBANKA_0314200	CDPK1	calcium-dependent protein kinase 1	PBANKA_0314200.1-p1	1	14	S4(Phospho): 100
TLCGALSNMR	1xCarbamidomethyl [C3]; 1xOxidation [M9]; 1xTMT6plex [N-Term]; 1xPhospho [S7(100)]	2	PBANKA_0314200	CDPK1	calcium-dependent protein kinase 1	0	0.17	0.36	0.22	0.35	0.56	1	1	1	1	1		29
	Annotated Sequence	# Proteins	Master Protein Accessions			Protein Accessions	# Missed Cleavages	Ions Score	ptmRS: Best Site Probabilities
	tLcGALsNmR	1	PBANKA_0314200	CDPK1	calcium-dependent protein kinase 1	PBANKA_0314200.1-p1	0	29	S7(Phospho): 100
	tLcGALsNmR	1	PBANKA_0314200	CDPK1	calcium-dependent protein kinase 1	PBANKA_0314200.1-p1	0	26	S7(Phospho): 100
LGSGAYGEVLLCK	1xCarbamidomethyl [C12]; 1xTMT6plex [K13]; 1xTMT6plex [N-Term]; 1xPhospho [S3(100)]	4	PBANKA_0314200	CDPK1	calcium-dependent protein kinase 1	0	0.26	0.48	0.37	0.22	0.33	1	1	1	1	1		66
	Annotated Sequence	# Proteins	Master Protein Accessions			Protein Accessions	# Missed Cleavages	Ions Score	ptmRS: Best Site Probabilities
	lGsGAYGEVLLck	1	PBANKA_0314200	CDPK1	calcium-dependent protein kinase 1	PBANKA_0314200.1-p1	0	66	S3(Phospho): 100
	lGsGAYGEVLLck	1	PBANKA_0314200	CDPK1	calcium-dependent protein kinase 1	PBANKA_0314200.1-p1	0	58	S3(Phospho): 100
	lGsGAYGEVLLck	1	PBANKA_0314200	CDPK1	calcium-dependent protein kinase 1	PBANKA_0314200.1-p1	0	37	S3(Phospho): 100
	lGsGAYGEVLLck	1	PBANKA_0314200	CDPK1	calcium-dependent protein kinase 1	PBANKA_0314200.1-p1	0	23	S3(Phospho): 100
DIKEASVYSTFQLPK	2xTMT6plex [K3; K15]; 1xTMT6plex [N-Term]; 1xPhospho [T10(100)]	4	PBANKA_0314500	RPS26	4S ribosomal protein S26, putative	1	-0.15	0.51	0.45	0.07	0.15	1	1	1	1	1		29
	Annotated Sequence	# Proteins	Master Protein Accessions			Protein Accessions	# Missed Cleavages	Ions Score	ptmRS: Best Site Probabilities
	dIkEASVYStFQLPk	1	PBANKA_0314500	RPS26	4S ribosomal protein S26, putative	PBANKA_0314500.1-p1	1	29	T10(Phospho): 100
	dIkEASVYsTFQLPk	1	PBANKA_0314500	RPS26	4S ribosomal protein S26, putative	PBANKA_0314500.1-p1	1	24	S9(Phospho): 50; T10(Phospho): 50
	dIkEASVYStFQLPk	1	PBANKA_0314500	RPS26	4S ribosomal protein S26, putative	PBANKA_0314500.1-p1	1	20	T10(Phospho): 100
	dIkEASVYsTFQLPk	1	PBANKA_0314500	RPS26	4S ribosomal protein S26, putative	PBANKA_0314500.1-p1	1	14	S9(Phospho): 50; T10(Phospho): 50
EASVYSTFQLPK	1xTMT6plex [K12]; 1xTMT6plex [N-Term]; 1xPhospho [T7(99.8)]	6	PBANKA_0314500	RPS26	4S ribosomal protein S26, putative	0	-0.01	0.18	0.08	0.12	-0.03	1	1	1	1	1		40
	Annotated Sequence	# Proteins	Master Protein Accessions			Protein Accessions	# Missed Cleavages	Ions Score	ptmRS: Best Site Probabilities
	eASVYStFQLPk	1	PBANKA_0314500	RPS26	4S ribosomal protein S26, putative	PBANKA_0314500.1-p1	0	40	T7(Phospho): 99.77
	eASVYsTFQLPk	1	PBANKA_0314500	RPS26	4S ribosomal protein S26, putative	PBANKA_0314500.1-p1	0	30	S6(Phospho): 99.6
	eASVYsTFQLPk	1	PBANKA_0314500	RPS26	4S ribosomal protein S26, putative	PBANKA_0314500.1-p1	0	30	S6(Phospho): 99.62
	eAsVYSTFQLPk	1	PBANKA_0314500	RPS26	4S ribosomal protein S26, putative	PBANKA_0314500.1-p1	0	29	S3(Phospho): 100
	eASVYStFQLPk	1	PBANKA_0314500	RPS26	4S ribosomal protein S26, putative	PBANKA_0314500.1-p1	0	29	T7(Phospho): 99.51
	eASVYStFQLPk	1	PBANKA_0314500	RPS26	4S ribosomal protein S26, putative	PBANKA_0314500.1-p1	0	13	S6(Phospho): 99.57
QCYCVSCAIHSR	3xCarbamidomethyl [C2; C4; C7]; 1xTMT6plex [N-Term]; 1xPhospho [S11(100)]	2	PBANKA_0314500	RPS26	4S ribosomal protein S26, putative	0	-0.13	0.1	-0.04	-0.14	0.17							57
	Annotated Sequence	# Proteins	Master Protein Accessions			Protein Accessions	# Missed Cleavages	Ions Score	ptmRS: Best Site Probabilities
	qcYcVScAIHsR	1	PBANKA_0314500	RPS26	4S ribosomal protein S26, putative	PBANKA_0314500.1-p1	0	57	S11(Phospho): 100
	qcYcVScAIHsR	1	PBANKA_0314500	RPS26	4S ribosomal protein S26, putative	PBANKA_0314500.1-p1	0	36	S11(Phospho): 100
NIVDTSAQR	1xTMT6plex [N-Term]; 1xPhospho [T5(100)]	1	PBANKA_0314500	RPS26	4S ribosomal protein S26, putative	0	-0.02	0.32	-0.11	0.11	0.16							29
	Annotated Sequence	# Proteins	Master Protein Accessions			Protein Accessions	# Missed Cleavages	Ions Score	ptmRS: Best Site Probabilities
	nIVDtSAQR	1	PBANKA_0314500	RPS26	4S ribosomal protein S26, putative	PBANKA_0314500.1-p1	0	29	T5(Phospho): 100
HAHVSQL	1xTMT6plex [N-Term]; 1xPhospho [S5(100)]	2	PBANKA_0314500	RPS26	4S ribosomal protein S26, putative	0	-0.02	0.56	0.37	0.46	0.22	1	1	1	1	1		22
	Annotated Sequence	# Proteins	Master Protein Accessions			Protein Accessions	# Missed Cleavages	Ions Score	ptmRS: Best Site Probabilities
	hAHVsQL	1	PBANKA_0314500	RPS26	4S ribosomal protein S26, putative	PBANKA_0314500.1-p1	0	22	S5(Phospho): 100
	hAHVsQL	1	PBANKA_0314500	RPS26	4S ribosomal protein S26, putative	PBANKA_0314500.1-p1	0	21	S5(Phospho): 100
FNNSQIIHK	1xTMT6plex [K9]; 1xTMT6plex [N-Term]; 1xPhospho [S4(100)]	2	PBANKA_0314900		SUZ domain-containing protein, putative	0	0.4	0.32	0.45	0.38	0.38	1	1	1	1	1		24
	Annotated Sequence	# Proteins	Master Protein Accessions			Protein Accessions	# Missed Cleavages	Ions Score	ptmRS: Best Site Probabilities
	fNNsQIIHk	1	PBANKA_0314900		SUZ domain-containing protein, putative	PBANKA_0314900.1-p1	0	24	S4(Phospho): 100
	fNNsQIIHk	1	PBANKA_0314900		SUZ domain-containing protein, putative	PBANKA_0314900.1-p1	0	24	S4(Phospho): 100
NTINDNNSTLNPQPSIIIPNK	1xTMT6plex [K21]; 1xTMT6plex [N-Term]; 1xPhospho [S15(100)]	4	PBANKA_0314900		SUZ domain-containing protein, putative	0	-0.28	-0.19	0.03	-0.09	0.01	1	1	1	1	1		58
	Annotated Sequence	# Proteins	Master Protein Accessions			Protein Accessions	# Missed Cleavages	Ions Score	ptmRS: Best Site Probabilities
	nTINDNNSTLNPQPsIIIPNk	1	PBANKA_0314900		SUZ domain-containing protein, putative	PBANKA_0314900.1-p1	0	58	S15(Phospho): 100
	nTINDNNSTLNPQPsIIIPNk	1	PBANKA_0314900		SUZ domain-containing protein, putative	PBANKA_0314900.1-p1	0	56	S15(Phospho): 100
	nTINDNNSTLNPQPsIIIPNk	1	PBANKA_0314900		SUZ domain-containing protein, putative	PBANKA_0314900.1-p1	0	56	S15(Phospho): 100
	nTINDNNSTLNPQPsIIIPNk	1	PBANKA_0314900		SUZ domain-containing protein, putative	PBANKA_0314900.1-p1	0	53	S15(Phospho): 100
TLQNNTISYDKLEIFK	2xTMT6plex [K11; K16]; 1xTMT6plex [N-Term]; 1xPhospho [S8(100)]	2	PBANKA_0314900		SUZ domain-containing protein, putative	1	0.59	0.74	0.85	0.73	0.86	1	1	1	1	1		35
	Annotated Sequence	# Proteins	Master Protein Accessions			Protein Accessions	# Missed Cleavages	Ions Score	ptmRS: Best Site Probabilities
	tLQNNTIsYDkLEIFk	1	PBANKA_0314900		SUZ domain-containing protein, putative	PBANKA_0314900.1-p1	1	35	S8(Phospho): 100
	tLQNNTIsYDkLEIFk	1	PBANKA_0314900		SUZ domain-containing protein, putative	PBANKA_0314900.1-p1	1	18	S8(Phospho): 100
NINYEQDHAPINVGFSK	1xTMT6plex [K17]; 1xTMT6plex [N-Term]; 1xPhospho [S16(100)]	1	PBANKA_0314900		SUZ domain-containing protein, putative	0	-0.01	0.24	0.13	0.26	0.1							70
	Annotated Sequence	# Proteins	Master Protein Accessions			Protein Accessions	# Missed Cleavages	Ions Score	ptmRS: Best Site Probabilities
	nINYEQDHAPINVGFsk	1	PBANKA_0314900		SUZ domain-containing protein, putative	PBANKA_0314900.1-p1	0	70	S16(Phospho): 100
TSELNNLNLCSSFGDR	1xCarbamidomethyl [C10]; 1xTMT6plex [N-Term]; 1xPhospho [S12(99.6)]	2	PBANKA_0315300		patatin-like phospholipase, putative	0	0.08	0.06	0.33	-0.05	0.16	1	1	1	1	1		44
	Annotated Sequence	# Proteins	Master Protein Accessions			Protein Accessions	# Missed Cleavages	Ions Score	ptmRS: Best Site Probabilities
	tSELNNLNLcSsFGDR	1	PBANKA_0315300		patatin-like phospholipase, putative	PBANKA_0315300.1-p1	0	44	S12(Phospho): 99.63
	tSELNNLNLcSsFGDR	1	PBANKA_0315300		patatin-like phospholipase, putative	PBANKA_0315300.1-p1	0	33	S12(Phospho): 99.57
SATFEVCLLPK	1xCarbamidomethyl [C7]; 1xTMT6plex [K11]; 1xTMT6plex [N-Term]; 1xPhospho [T3(100)]	1	PBANKA_0315300		patatin-like phospholipase, putative	0	0.17	0.53	0.9	0.35	0.68							32
	Annotated Sequence	# Proteins	Master Protein Accessions			Protein Accessions	# Missed Cleavages	Ions Score	ptmRS: Best Site Probabilities
	sAtFEVcLLPk	1	PBANKA_0315300		patatin-like phospholipase, putative	PBANKA_0315300.1-p1	0	32	T3(Phospho): 100
MYISYSDTIYKK	2xTMT6plex [K11; K12]; 1xTMT6plex [N-Term]; 1xPhospho [S6(100)]	2	PBANKA_0315300		patatin-like phospholipase, putative	1	-0.2	-0.28	-0.3	-0.18	-0.22	1	1	1	1	1		22
	Annotated Sequence	# Proteins	Master Protein Accessions			Protein Accessions	# Missed Cleavages	Ions Score	ptmRS: Best Site Probabilities
	mYISYsDTIYkk	1	PBANKA_0315300		patatin-like phospholipase, putative	PBANKA_0315300.1-p1	1	22	S6(Phospho): 100
	mYISYsDTIYkk	1	PBANKA_0315300		patatin-like phospholipase, putative	PBANKA_0315300.1-p1	1	14	S6(Phospho): 100
EINKSESSNSFFFK	2xTMT6plex [K4; K14]; 1xTMT6plex [N-Term]; 1xPhospho [S7(99.7)]	2	PBANKA_0315300		patatin-like phospholipase, putative	1	-0.11	-0.22	-0.22	-0.17	-0.02	1	1	1	1	1		43
	Annotated Sequence	# Proteins	Master Protein Accessions			Protein Accessions	# Missed Cleavages	Ions Score	ptmRS: Best Site Probabilities
	eINkSEsSNSFFFk	1	PBANKA_0315300		patatin-like phospholipase, putative	PBANKA_0315300.1-p1	1	43	S7(Phospho): 99.67
	eINkSEsSNSFFFk	1	PBANKA_0315300		patatin-like phospholipase, putative	PBANKA_0315300.1-p1	1	24	S7(Phospho): 99.61
KNENNALIYQNSK	2xTMT6plex [K1; K13]; 1xTMT6plex [N-Term]; 1xPhospho [S12(100)]	1	PBANKA_0315300		patatin-like phospholipase, putative	1	0.06	0.03	0.02	-0.04	0.54							28
	Annotated Sequence	# Proteins	Master Protein Accessions			Protein Accessions	# Missed Cleavages	Ions Score	ptmRS: Best Site Probabilities
	kNENNALIYQNsk	1	PBANKA_0315300		patatin-like phospholipase, putative	PBANKA_0315300.1-p1	1	28	S12(Phospho): 100
RFSDCIGR	1xCarbamidomethyl [C5]; 1xTMT6plex [N-Term]; 1xPhospho [S3(100)]	9	PBANKA_0315600		4S ribosomal protein S3, putative	1	0.34	0.84	0.76	0.71	0.74	1	1	1	1	1		46
	Annotated Sequence	# Proteins	Master Protein Accessions			Protein Accessions	# Missed Cleavages	Ions Score	ptmRS: Best Site Probabilities
	rFsDcIGR	1	PBANKA_0315600		4S ribosomal protein S3, putative	PBANKA_0315600.1-p1	1	46	S3(Phospho): 100
	rFsDcIGR	1	PBANKA_0315600		4S ribosomal protein S3, putative	PBANKA_0315600.1-p1	1	46	S3(Phospho): 100
	rFsDcIGR	1	PBANKA_0315600		4S ribosomal protein S3, putative	PBANKA_0315600.1-p1	1	40	S3(Phospho): 100
	rFsDcIGR	1	PBANKA_0315600		4S ribosomal protein S3, putative	PBANKA_0315600.1-p1	1	27	S3(Phospho): 100
	rFsDcIGR	1	PBANKA_0315600		4S ribosomal protein S3, putative	PBANKA_0315600.1-p1	1	26	S3(Phospho): 100
	rFsDcIGR	1	PBANKA_0315600		4S ribosomal protein S3, putative	PBANKA_0315600.1-p1	1	25	S3(Phospho): 100
	rFsDcIGR	1	PBANKA_0315600		4S ribosomal protein S3, putative	PBANKA_0315600.1-p1	1	17	S3(Phospho): 100
	rFsDcIGR	1	PBANKA_0315600		4S ribosomal protein S3, putative	PBANKA_0315600.1-p1	1	16	S3(Phospho): 100
	rFsDcIGR	1	PBANKA_0315600		4S ribosomal protein S3, putative	PBANKA_0315600.1-p1	1	15	S3(Phospho): 100
FSDCIGR	1xCarbamidomethyl [C4]; 1xTMT6plex [N-Term]; 1xPhospho [S2(100)]	2	PBANKA_0315600		4S ribosomal protein S3, putative	0	0.41	1.2	0.89	0.93	0.74	1	1	1	1	1		17
	Annotated Sequence	# Proteins	Master Protein Accessions			Protein Accessions	# Missed Cleavages	Ions Score	ptmRS: Best Site Probabilities
	fsDcIGR	1	PBANKA_0315600		4S ribosomal protein S3, putative	PBANKA_0315600.1-p1	0	17	S2(Phospho): 100
	fsDcIGR	1	PBANKA_0315600		4S ribosomal protein S3, putative	PBANKA_0315600.1-p1	0	13	S2(Phospho): 100
VHGSLAR	1xTMT6plex [N-Term]; 1xPhospho [S4(100)]	2	PBANKA_0315600		4S ribosomal protein S3, putative	0	0.02	0.73	0.54	0.59	0.38	1	1	1	1	1		20
	Annotated Sequence	# Proteins	Master Protein Accessions			Protein Accessions	# Missed Cleavages	Ions Score	ptmRS: Best Site Probabilities
	vHGsLAR	1	PBANKA_0315600		4S ribosomal protein S3, putative	PBANKA_0315600.1-p1	0	20	S4(Phospho): 100
	vHGsLAR	1	PBANKA_0315600		4S ribosomal protein S3, putative	PBANKA_0315600.1-p1	0	19	S4(Phospho): 100
NETNVSQNFDYLPFINKK	2xTMT6plex [K17; K18]; 1xTMT6plex [N-Term]; 2xPhospho [T3(100); S6(100)]	1	PBANKA_0316000	RFC1	replication factor C subunit 1, putative	1	-0.26	0.37	0.68	-0.27	0.21							26
	Annotated Sequence	# Proteins	Master Protein Accessions			Protein Accessions	# Missed Cleavages	Ions Score	ptmRS: Best Site Probabilities
	nEtNVsQNFDYLPFINkk	1	PBANKA_0316000	RFC1	replication factor C subunit 1, putative	PBANKA_0316000.1-p1	1	26	T3(Phospho): 100; S6(Phospho): 100
FVLTGVFK	1xTMT6plex [K8]; 1xTMT6plex [N-Term]; 1xPhospho [T4(100)]	2	PBANKA_0316000	RFC1	replication factor C subunit 1, putative	0	0.86	1.14	1.37	0.93	0.98	0.606381	0.0579527	0.0191571	0.252981	0.167517		25
	Annotated Sequence	# Proteins	Master Protein Accessions			Protein Accessions	# Missed Cleavages	Ions Score	ptmRS: Best Site Probabilities
	fVLtGVFk	1	PBANKA_0316000	RFC1	replication factor C subunit 1, putative	PBANKA_0316000.1-p1	0	25	T4(Phospho): 100
	fVLtGVFk	1	PBANKA_0316000	RFC1	replication factor C subunit 1, putative	PBANKA_0316000.1-p1	0	23	T4(Phospho): 100
NENSQNYQSNTEQNHHILNQNMK	1xTMT6plex [K23]; 1xTMT6plex [N-Term]; 1xPhospho [S/T/Y]	2	PBANKA_0316000	RFC1	replication factor C subunit 1, putative	0	-0.27	-0.43	-0.12	-0.31	-0.27	1	1	1	1	1		49
	Annotated Sequence	# Proteins	Master Protein Accessions			Protein Accessions	# Missed Cleavages	Ions Score	ptmRS: Best Site Probabilities
	nENSQNYQSNtEQNHHILNQNMk	1	PBANKA_0316000	RFC1	replication factor C subunit 1, putative	PBANKA_0316000.1-p1	0	49	S9(Phospho): 50; T11(Phospho): 50
	nENSQNYQSNtEQNHHILNQNMk	1	PBANKA_0316000	RFC1	replication factor C subunit 1, putative	PBANKA_0316000.1-p1	0	42	S9(Phospho): 50; T11(Phospho): 50
NAYYDISSYFKPVSKNTPK	3xTMT6plex [K11; K15; K19]; 1xTMT6plex [N-Term]; 1xPhospho [S14(100)]	3	PBANKA_0316000	RFC1	replication factor C subunit 1, putative	1	-0.28	-0.01	0.24	-0.1	0.43	1	1	1	1	1		17
	Annotated Sequence	# Proteins	Master Protein Accessions			Protein Accessions	# Missed Cleavages	Ions Score	ptmRS: Best Site Probabilities
	nAYYDISSYFkPVskNTPk	1	PBANKA_0316000	RFC1	replication factor C subunit 1, putative	PBANKA_0316000.1-p1	1	17	S14(Phospho): 100
	nAYYDISSYFkPVskNTPk	1	PBANKA_0316000	RFC1	replication factor C subunit 1, putative	PBANKA_0316000.1-p1	1	17	S14(Phospho): 100
	nAYYDISSYFkPVSkNtPk	1	PBANKA_0316000	RFC1	replication factor C subunit 1, putative	PBANKA_0316000.1-p1	1	14	S14(Phospho): 98.37
YVFTEDNIILQK	1xTMT6plex [K12]; 1xTMT6plex [N-Term]; 1xPhospho [T4(100)]	2	PBANKA_0316000	RFC1	replication factor C subunit 1, putative	0	0.17	0.42	0.74	0.41	0.37	1	1	0.749536	1	1		27
	Annotated Sequence	# Proteins	Master Protein Accessions			Protein Accessions	# Missed Cleavages	Ions Score	ptmRS: Best Site Probabilities
	yVFtEDNIILQk	1	PBANKA_0316000	RFC1	replication factor C subunit 1, putative	PBANKA_0316000.1-p1	0	27	T4(Phospho): 100
	yVFtEDNIILQk	1	PBANKA_0316000	RFC1	replication factor C subunit 1, putative	PBANKA_0316000.1-p1	0	27	T4(Phospho): 100
TWLSSWDDVCIK	1xCarbamidomethyl [C10]; 1xTMT6plex [K12]; 1xTMT6plex [N-Term]; 1xPhospho [S4(99.8)]	4	PBANKA_0316000	RFC1	replication factor C subunit 1, putative	0	-0.44	-0.15	-0.18	-0.32	-0.25	1	1	1	1	1		41
	Annotated Sequence	# Proteins	Master Protein Accessions			Protein Accessions	# Missed Cleavages	Ions Score	ptmRS: Best Site Probabilities
	tWLsSWDDVcIk	1	PBANKA_0316000	RFC1	replication factor C subunit 1, putative	PBANKA_0316000.1-p1	0	41	S4(Phospho): 99.79
	tWLsSWDDVcIk	1	PBANKA_0316000	RFC1	replication factor C subunit 1, putative	PBANKA_0316000.1-p1	0	38	S4(Phospho): 99.83
	tWLsSWDDVcIk	1	PBANKA_0316000	RFC1	replication factor C subunit 1, putative	PBANKA_0316000.1-p1	0	24	S4(Phospho): 99.71
	tWLsSWDDVcIk	1	PBANKA_0316000	RFC1	replication factor C subunit 1, putative	PBANKA_0316000.1-p1	0	20	S4(Phospho): 99.7
KIPLENVDEYFNIIETGSK	2xTMT6plex [K1; K19]; 1xTMT6plex [N-Term]; 1xPhospho [S18(100)]	3	PBANKA_0316000	RFC1	replication factor C subunit 1, putative	1	-0.02	-0.12	-0.02	0.04	-0.11	1	1	1	1	1		48
	Annotated Sequence	# Proteins	Master Protein Accessions			Protein Accessions	# Missed Cleavages	Ions Score	ptmRS: Best Site Probabilities
	kIPLENVDEYFNIIETGsk	1	PBANKA_0316000	RFC1	replication factor C subunit 1, putative	PBANKA_0316000.1-p1	1	48	S18(Phospho): 100
	kIPLENVDEYFNIIETGsk	1	PBANKA_0316000	RFC1	replication factor C subunit 1, putative	PBANKA_0316000.1-p1	1	48	S18(Phospho): 100
	kIPLENVDEYFNIIETGsk	1	PBANKA_0316000	RFC1	replication factor C subunit 1, putative	PBANKA_0316000.1-p1	1	28	S18(Phospho): 100
ISNNLFENEDQNVLNNSDAK	1xTMT6plex [K20]; 1xTMT6plex [N-Term]; 1xPhospho [S17(100)]	2	PBANKA_0316000	RFC1	replication factor C subunit 1, putative	0	-0.18	-0.09	-0.18	-0.22	-0.15	1	1	1	1	1		62
	Annotated Sequence	# Proteins	Master Protein Accessions			Protein Accessions	# Missed Cleavages	Ions Score	ptmRS: Best Site Probabilities
	iSNNLFENEDQNVLNNsDAk	1	PBANKA_0316000	RFC1	replication factor C subunit 1, putative	PBANKA_0316000.1-p1	0	62	S17(Phospho): 100
	iSNNLFENEDQNVLNNsDAk	1	PBANKA_0316000	RFC1	replication factor C subunit 1, putative	PBANKA_0316000.1-p1	0	46	S17(Phospho): 100
NAYYDISSYFKPVSK	2xTMT6plex [K11; K15]; 1xTMT6plex [N-Term]; 1xPhospho [S14(100)]	4	PBANKA_0316000	RFC1	replication factor C subunit 1, putative	0	-0.04	0.19	0.31	0.14	0.16	1	1	1	1	1		28
	Annotated Sequence	# Proteins	Master Protein Accessions			Protein Accessions	# Missed Cleavages	Ions Score	ptmRS: Best Site Probabilities
	nAYYDISSYFkPVsk	1	PBANKA_0316000	RFC1	replication factor C subunit 1, putative	PBANKA_0316000.1-p1	0	28	S14(Phospho): 100
	nAYYDISSYFkPVsk	1	PBANKA_0316000	RFC1	replication factor C subunit 1, putative	PBANKA_0316000.1-p1	0	25	S14(Phospho): 100
	nAYYDISSYFkPVsk	1	PBANKA_0316000	RFC1	replication factor C subunit 1, putative	PBANKA_0316000.1-p1	0	21	S14(Phospho): 100
	nAYYDISSYFkPVsk	1	PBANKA_0316000	RFC1	replication factor C subunit 1, putative	PBANKA_0316000.1-p1	0	18	S14(Phospho): 100
IVVEIKDESDDELAK	2xTMT6plex [K6; K15]; 1xTMT6plex [N-Term]; 1xPhospho [S9(100)]	1	PBANKA_0316000	RFC1	replication factor C subunit 1, putative	1	0.15	-0.32	-0.19	-0.02	-0.18							23
	Annotated Sequence	# Proteins	Master Protein Accessions			Protein Accessions	# Missed Cleavages	Ions Score	ptmRS: Best Site Probabilities
	iVVEIkDEsDDELAk	1	PBANKA_0316000	RFC1	replication factor C subunit 1, putative	PBANKA_0316000.1-p1	1	23	S9(Phospho): 100
KNAYYDISSYFKPVSK	3xTMT6plex [K1; K12; K16]; 1xTMT6plex [N-Term]; 1xPhospho [S15(100)]	2	PBANKA_0316000	RFC1	replication factor C subunit 1, putative	1	0	-0.08	0.04	-0.07	-0.19	1	1	1	1	1		32
	Annotated Sequence	# Proteins	Master Protein Accessions			Protein Accessions	# Missed Cleavages	Ions Score	ptmRS: Best Site Probabilities
	kNAYYDISSYFkPVsk	1	PBANKA_0316000	RFC1	replication factor C subunit 1, putative	PBANKA_0316000.1-p1	1	32	S15(Phospho): 100
	kNAYYDISSYFkPVsk	1	PBANKA_0316000	RFC1	replication factor C subunit 1, putative	PBANKA_0316000.1-p1	1	15	S15(Phospho): 100
QKNENSQNYQSNTEQNHHILNQNMK	2xTMT6plex [K2; K25]; 1xTMT6plex [N-Term]; 1xPhospho [S11(99.4)]	3	PBANKA_0316000	RFC1	replication factor C subunit 1, putative	1	-0.36	-0.2	-0.14	-0.08	-0.04	1	1	1	1	1		71
	Annotated Sequence	# Proteins	Master Protein Accessions			Protein Accessions	# Missed Cleavages	Ions Score	ptmRS: Best Site Probabilities
	qkNENSQNYQsNTEQNHHILNQNMk	1	PBANKA_0316000	RFC1	replication factor C subunit 1, putative	PBANKA_0316000.1-p1	1	71	S11(Phospho): 99.39
	qkNENSQNYQSNtEQNHHILNQNMk	1	PBANKA_0316000	RFC1	replication factor C subunit 1, putative	PBANKA_0316000.1-p1	1	41	S11(Phospho): 99.39
	qkNENSQNYQSNtEQNHHILNQNMk	1	PBANKA_0316000	RFC1	replication factor C subunit 1, putative	PBANKA_0316000.1-p1	1	17	S11(Phospho): 49.83; T13(Phospho): 49.83
IPLENVDEYFNIIETGSKK	2xTMT6plex [K18; K19]; 1xTMT6plex [N-Term]; 1xPhospho [S17(100)]	2	PBANKA_0316000	RFC1	replication factor C subunit 1, putative	1	0.28	0.3	0.19	0.36	0.28	1	1	1	1	1		69
	Annotated Sequence	# Proteins	Master Protein Accessions			Protein Accessions	# Missed Cleavages	Ions Score	ptmRS: Best Site Probabilities
	iPLENVDEYFNIIETGskk	1	PBANKA_0316000	RFC1	replication factor C subunit 1, putative	PBANKA_0316000.1-p1	1	69	S17(Phospho): 100
	iPLENVDEYFNIIETGskk	1	PBANKA_0316000	RFC1	replication factor C subunit 1, putative	PBANKA_0316000.1-p1	1	48	S17(Phospho): 100
ERSHDSDILEQNR	1xTMT6plex [N-Term]; 1xPhospho [S3(100)]	5	PBANKA_0316000	RFC1	replication factor C subunit 1, putative	1	0.2	-0.09	-0.06	-0.11	0.07	1	1	1	1	1		42
	Annotated Sequence	# Proteins	Master Protein Accessions			Protein Accessions	# Missed Cleavages	Ions Score	ptmRS: Best Site Probabilities
	eRsHDSDILEQNR	1	PBANKA_0316000	RFC1	replication factor C subunit 1, putative	PBANKA_0316000.1-p1	1	42	S3(Phospho): 100
	eRsHDSDILEQNR	1	PBANKA_0316000	RFC1	replication factor C subunit 1, putative	PBANKA_0316000.1-p1	1	41	S3(Phospho): 100
	eRsHDSDILEQNR	1	PBANKA_0316000	RFC1	replication factor C subunit 1, putative	PBANKA_0316000.1-p1	1	40	S3(Phospho): 100
	eRsHDSDILEQNR	1	PBANKA_0316000	RFC1	replication factor C subunit 1, putative	PBANKA_0316000.1-p1	1	30	S3(Phospho): 100
	eRsHDSDILEQNR	1	PBANKA_0316000	RFC1	replication factor C subunit 1, putative	PBANKA_0316000.1-p1	1	28	S3(Phospho): 100
NETNVSQNFDYLPFINKK	2xTMT6plex [K17; K18]; 1xTMT6plex [N-Term]; 1xPhospho [S6(99.6)]	4	PBANKA_0316000	RFC1	replication factor C subunit 1, putative	1	-0.3	0	0.06	-0.19	0.02	1	1	1	1	1		62
	Annotated Sequence	# Proteins	Master Protein Accessions			Protein Accessions	# Missed Cleavages	Ions Score	ptmRS: Best Site Probabilities
	nETNVsQNFDYLPFINkk	1	PBANKA_0316000	RFC1	replication factor C subunit 1, putative	PBANKA_0316000.1-p1	1	62	S6(Phospho): 100
	nETNVsQNFDYLPFINkk	1	PBANKA_0316000	RFC1	replication factor C subunit 1, putative	PBANKA_0316000.1-p1	1	53	S6(Phospho): 100
	nETNVsQNFDYLPFINkk	1	PBANKA_0316000	RFC1	replication factor C subunit 1, putative	PBANKA_0316000.1-p1	1	34	S6(Phospho): 99.64
	nETNVsQNFDYLPFINkk	1	PBANKA_0316000	RFC1	replication factor C subunit 1, putative	PBANKA_0316000.1-p1	1	33	S6(Phospho): 100
LFSDNSSDEGR	1xTMT6plex [N-Term]; 1xPhospho [S]	1	PBANKA_0316000	RFC1	replication factor C subunit 1, putative	0	-0.54	-0.59	-0.68	-0.62	-0.92							13
	Annotated Sequence	# Proteins	Master Protein Accessions			Protein Accessions	# Missed Cleavages	Ions Score	ptmRS: Best Site Probabilities
	lFSDNSsDEGR	1	PBANKA_0316000	RFC1	replication factor C subunit 1, putative	PBANKA_0316000.1-p1	0	13	S6(Phospho): 50; S7(Phospho): 50
ERSHDSDILEQNR	1xTMT6plex [N-Term]; 2xPhospho [S3(100); S6(100)]	4	PBANKA_0316000	RFC1	replication factor C subunit 1, putative	1	-0.04	0.05	0.01	0.07	0.02	1	1	1	1	1		39
	Annotated Sequence	# Proteins	Master Protein Accessions			Protein Accessions	# Missed Cleavages	Ions Score	ptmRS: Best Site Probabilities
	eRsHDsDILEQNR	1	PBANKA_0316000	RFC1	replication factor C subunit 1, putative	PBANKA_0316000.1-p1	1	39	S3(Phospho): 100; S6(Phospho): 100
	eRsHDsDILEQNR	1	PBANKA_0316000	RFC1	replication factor C subunit 1, putative	PBANKA_0316000.1-p1	1	33	S3(Phospho): 100; S6(Phospho): 100
	eRsHDsDILEQNR	1	PBANKA_0316000	RFC1	replication factor C subunit 1, putative	PBANKA_0316000.1-p1	1	32	S3(Phospho): 100; S6(Phospho): 100
	eRsHDsDILEQNR	1	PBANKA_0316000	RFC1	replication factor C subunit 1, putative	PBANKA_0316000.1-p1	1	25	S3(Phospho): 100; S6(Phospho): 100
NETNVSQNFDYLPFINK	1xTMT6plex [K17]; 1xTMT6plex [N-Term]; 1xPhospho [S6(100)]	6	PBANKA_0316000	RFC1	replication factor C subunit 1, putative	0	-0.26	-0.08	-0.13	-0.09	-0.37	1	1	1	1	1		70
	Annotated Sequence	# Proteins	Master Protein Accessions			Protein Accessions	# Missed Cleavages	Ions Score	ptmRS: Best Site Probabilities
	nETNVsQNFDYLPFINk	1	PBANKA_0316000	RFC1	replication factor C subunit 1, putative	PBANKA_0316000.1-p1	0	70	S6(Phospho): 100
	nETNVsQNFDYLPFINk	1	PBANKA_0316000	RFC1	replication factor C subunit 1, putative	PBANKA_0316000.1-p1	0	56	S6(Phospho): 100
	nETNVsQNFDYLPFINk	1	PBANKA_0316000	RFC1	replication factor C subunit 1, putative	PBANKA_0316000.1-p1	0	54	S6(Phospho): 100
	nETNVsQNFDYLPFINk	1	PBANKA_0316000	RFC1	replication factor C subunit 1, putative	PBANKA_0316000.1-p1	0	53	S6(Phospho): 100
	nETNVsQNFDYLPFINk	1	PBANKA_0316000	RFC1	replication factor C subunit 1, putative	PBANKA_0316000.1-p1	0	52	S6(Phospho): 100
	nETNVsQNFDYLPFINk	1	PBANKA_0316000	RFC1	replication factor C subunit 1, putative	PBANKA_0316000.1-p1	0	51	S6(Phospho): 100
[truncated: 20,938 more rows]

## Sheet: 0 sec
Sequence	Modifications	# PSMs	Master Protein Accessions	Protein Name	Protein Description	# Missed Cleavages	Abundance Ratio (log2): (0, KO) / (0, WT)	Abundance Ratio (log2): (15, KO) / (15, WT)	Abundance Ratio (log2): (30, KO) / (30, WT)	Abundance Ratio (log2): (45, KO) / (45, WT)	Abundance Ratio (log2): (60, KO) / (60, WT)	Abundance Ratio Adj. P-Value: (0, KO) / (0, WT)	Abundance Ratio Adj. P-Value: (15, KO) / (15, WT)	Abundance Ratio Adj. P-Value: (30, KO) / (30, WT)	Abundance Ratio Adj. P-Value: (45, KO) / (45, WT)	Abundance Ratio Adj. P-Value: (60, KO) / (60, WT)	Quan Info	Ions Score (by Search Engine): Mascot
TFSTLPPHMENLMSLK	1xTMT6plex [K16]; 1xTMT6plex [N-Term]; 2xPhospho [S3(99.5); S14(100)]	2	PBANKA_0100700		Plasmodium exported protein, unknown function	0	0.04	0.5	0.8	0.49	0.35	1	1	0.413599	1	1		63
	Annotated Sequence	# Proteins	Master Protein Accessions			Protein Accessions	# Missed Cleavages	Ions Score	ptmRS: Best Site Probabilities
	tFStLPPHMENLMsLk	1	PBANKA_0100700		Plasmodium exported protein, unknown function	PBANKA_0100700.1-p1	0	63	S3(Phospho): 99.53; S14(Phospho): 100
	tFStLPPHMENLMsLk	1	PBANKA_0100700		Plasmodium exported protein, unknown function	PBANKA_0100700.1-p1	0	49	S3(Phospho): 99.5; S14(Phospho): 100
EMLSNDLSNNDEIDEEKR	1xTMT6plex [K17]; 1xTMT6plex [N-Term]; 1xPhospho [S4(100)]	4	PBANKA_0100700		Plasmodium exported protein, unknown function	1	0.09	0.12	0.3	0.13	0.23	1	1	1	1	1		39
	Annotated Sequence	# Proteins	Master Protein Accessions			Protein Accessions	# Missed Cleavages	Ions Score	ptmRS: Best Site Probabilities
	eMLsNDLSNNDEIDEEkR	1	PBANKA_0100700		Plasmodium exported protein, unknown function	PBANKA_0100700.1-p1	1	39	S4(Phospho): 100
	eMLsNDLSNNDEIDEEkR	1	PBANKA_0100700		Plasmodium exported protein, unknown function	PBANKA_0100700.1-p1	1	38	S4(Phospho): 100
	eMLsNDLSNNDEIDEEkR	1	PBANKA_0100700		Plasmodium exported protein, unknown function	PBANKA_0100700.1-p1	1	36	S4(Phospho): 100
	eMLsNDLSNNDEIDEEkR	1	PBANKA_0100700		Plasmodium exported protein, unknown function	PBANKA_0100700.1-p1	1	33	S4(Phospho): 100
EMLSNDLSNNDEIDEEKR	1xOxidation [M2]; 1xTMT6plex [K17]; 1xTMT6plex [N-Term]; 1xPhospho [S4(100)]	7	PBANKA_0100700		Plasmodium exported protein, unknown function	1	-0.09	0.09	0.03	0.05	0.07	1	1	1	1	1		40
	Annotated Sequence	# Proteins	Master Protein Accessions			Protein Accessions	# Missed Cleavages	Ions Score	ptmRS: Best Site Probabilities
	emLsNDLSNNDEIDEEkR	1	PBANKA_0100700		Plasmodium exported protein, unknown function	PBANKA_0100700.1-p1	1	40	S4(Phospho): 100
	emLsNDLSNNDEIDEEkR	1	PBANKA_0100700		Plasmodium exported protein, unknown function	PBANKA_0100700.1-p1	1	33	S4(Phospho): 100
	emLsNDLSNNDEIDEEkR	1	PBANKA_0100700		Plasmodium exported protein, unknown function	PBANKA_0100700.1-p1	1	28	S4(Phospho): 100
	emLsNDLSNNDEIDEEkR	1	PBANKA_0100700		Plasmodium exported protein, unknown function	PBANKA_0100700.1-p1	1	26	S4(Phospho): 100
	emLsNDLSNNDEIDEEkR	1	PBANKA_0100700		Plasmodium exported protein, unknown function	PBANKA_0100700.1-p1	1	26	S4(Phospho): 100
	emLsNDLSNNDEIDEEkR	1	PBANKA_0100700		Plasmodium exported protein, unknown function	PBANKA_0100700.1-p1	1	21	S4(Phospho): 100
	emLsNDLSNNDEIDEEkR	1	PBANKA_0100700		Plasmodium exported protein, unknown function	PBANKA_0100700.1-p1	1	14	S4(Phospho): 99.99
TFSTLPPHMENLMSLK	1xTMT6plex [K16]; 1xTMT6plex [N-Term]; 1xPhospho [S3(99.7)]	4	PBANKA_0100700		Plasmodium exported protein, unknown function	0	-0.08	0.26	0.27	0.26	0.17	1	1	1	1	1		61
	Annotated Sequence	# Proteins	Master Protein Accessions			Protein Accessions	# Missed Cleavages	Ions Score	ptmRS: Best Site Probabilities
	tFsTLPPHMENLMSLk	1	PBANKA_0100700		Plasmodium exported protein, unknown function	PBANKA_0100700.1-p1	0	61	S3(Phospho): 99.68
	tFSTLPPHMENLMsLk	1	PBANKA_0100700		Plasmodium exported protein, unknown function	PBANKA_0100700.1-p1	0	55	S14(Phospho): 100
	tFsTLPPHMENLMSLk	1	PBANKA_0100700		Plasmodium exported protein, unknown function	PBANKA_0100700.1-p1	0	54	S3(Phospho): 99.59
	tFSTLPPHMENLMsLk	1	PBANKA_0100700		Plasmodium exported protein, unknown function	PBANKA_0100700.1-p1	0	49	S14(Phospho): 100
YNTLETNYR	1xTMT6plex [N-Term]; 1xPhospho [T3(100)]	2	PBANKA_0100800		zinc finger protein, putative	0	0.22	0.23	0.17	0.1	-0.02	1	1	1	1	1		25
	Annotated Sequence	# Proteins	Master Protein Accessions			Protein Accessions	# Missed Cleavages	Ions Score	ptmRS: Best Site Probabilities
	yNtLETNYR	1	PBANKA_0100800		zinc finger protein, putative	PBANKA_0100800.1-p1	0	25	T3(Phospho): 100
	yNtLETNYR	1	PBANKA_0100800		zinc finger protein, putative	PBANKA_0100800.1-p1	0	25	T3(Phospho): 100
INTEYIFNNVNNIK	1xTMT6plex [K14]; 1xTMT6plex [N-Term]; 1xPhospho [T3(100)]	1	PBANKA_0100800		zinc finger protein, putative	0	0.11	0	-0.21	0.09	-0.28							23
	Annotated Sequence	# Proteins	Master Protein Accessions			Protein Accessions	# Missed Cleavages	Ions Score	ptmRS: Best Site Probabilities
	iNtEYIFNNVNNIk	1	PBANKA_0100800		zinc finger protein, putative	PBANKA_0100800.1-p1	0	23	T3(Phospho): 100
KYSDVLGENIINGNEWNNTIK	2xTMT6plex [K1; K21]; 1xTMT6plex [N-Term]; 1xPhospho [S3(100)]	4	PBANKA_0100800		zinc finger protein, putative	1	-0.11	-0.24	-0.26	-0.27	-0.18	1	1	1	1	1		73
	Annotated Sequence	# Proteins	Master Protein Accessions			Protein Accessions	# Missed Cleavages	Ions Score	ptmRS: Best Site Probabilities
	kYsDVLGENIINGNEWNNTIk	1	PBANKA_0100800		zinc finger protein, putative	PBANKA_0100800.1-p1	1	73	S3(Phospho): 100
	kYsDVLGENIINGNEWNNTIk	1	PBANKA_0100800		zinc finger protein, putative	PBANKA_0100800.1-p1	1	60	S3(Phospho): 100
	kYsDVLGENIINGNEWNNTIk	1	PBANKA_0100800		zinc finger protein, putative	PBANKA_0100800.1-p1	1	51	S3(Phospho): 100
	kYsDVLGENIINGNEWNNTIk	1	PBANKA_0100800		zinc finger protein, putative	PBANKA_0100800.1-p1	1	34	S3(Phospho): 100
DFPNLDNCKTFDNFNFDDTIK	1xCarbamidomethyl [C8]; 2xTMT6plex [K9; K21]; 1xTMT6plex [N-Term]; 1xPhospho [T10(100)]	1	PBANKA_0100800		zinc finger protein, putative	1											No Quan Values	36
	Annotated Sequence	# Proteins	Master Protein Accessions			Protein Accessions	# Missed Cleavages	Ions Score	ptmRS: Best Site Probabilities
	dFPNLDNcktFDNFNFDDTIk	1	PBANKA_0100800		zinc finger protein, putative	PBANKA_0100800.1-p1	1	36	T10(Phospho): 100
NSSDINYINSKDNLFVFK	2xTMT6plex [K11; K18]; 1xTMT6plex [N-Term]; 1xPhospho [S10(100)]	3	PBANKA_0100800		zinc finger protein, putative	1	0.17	0.21	0.45	0.03	0.3	1	1	1	1	1		39
	Annotated Sequence	# Proteins	Master Protein Accessions			Protein Accessions	# Missed Cleavages	Ions Score	ptmRS: Best Site Probabilities
	nSSDINYINskDNLFVFk	1	PBANKA_0100800		zinc finger protein, putative	PBANKA_0100800.1-p1	1	39	S10(Phospho): 100
	nSSDINYINskDNLFVFk	1	PBANKA_0100800		zinc finger protein, putative	PBANKA_0100800.1-p1	1	37	S10(Phospho): 100
	nSSDINYINskDNLFVFk	1	PBANKA_0100800		zinc finger protein, putative	PBANKA_0100800.1-p1	1	27	S10(Phospho): 100
SMNSALFQYSSSIFNNAWSK	1xTMT6plex [K20]; 1xTMT6plex [N-Term]; 2xPhospho [S4(100); Y/S]	1	PBANKA_0100800		zinc finger protein, putative	0	-0.3	-0.16	0.04	-0.4	0.12							27
	Annotated Sequence	# Proteins	Master Protein Accessions			Protein Accessions	# Missed Cleavages	Ions Score	ptmRS: Best Site Probabilities
	sMNsALFQYSSsIFNNAWSk	1	PBANKA_0100800		zinc finger protein, putative	PBANKA_0100800.1-p1	0	27	S4(Phospho): 100; Y9(Phospho): 25; S10(Phospho): 25; S11(Phospho): 25; S12(Phospho): 25
ELEENNEAEDNEIKGDAGVNTGNILGSGNSTK	2xTMT6plex [K14; K32]; 1xTMT6plex [N-Term]; 1xPhospho [S/T]	2	PBANKA_0100800		zinc finger protein, putative	1	0.18	-0.11	-0.1	0.04	-0.04							54
	Annotated Sequence	# Proteins	Master Protein Accessions			Protein Accessions	# Missed Cleavages	Ions Score	ptmRS: Best Site Probabilities
	eLEENNEAEDNEIkGDAGVNTGNILGSGNsTk	1	PBANKA_0100800		zinc finger protein, putative	PBANKA_0100800.1-p1	1	54	S30(Phospho): 50; T31(Phospho): 50
	eLEENNEAEDNEIkGDAGVNTGNILGSGNsTk	1	PBANKA_0100800		zinc finger protein, putative	PBANKA_0100800.1-p1	1	37	S30(Phospho): 50; T31(Phospho): 50
ILSCVSK	1xCarbamidomethyl [C4]; 1xTMT6plex [K7]; 1xTMT6plex [N-Term]; 1xPhospho [S6(100)]	2	PBANKA_0100800		zinc finger protein, putative	0	-0.23	0.17	0.11	0.09	-0.13	1	1	1	1	1		26
	Annotated Sequence	# Proteins	Master Protein Accessions			Protein Accessions	# Missed Cleavages	Ions Score	ptmRS: Best Site Probabilities
	iLScVsk	1	PBANKA_0100800		zinc finger protein, putative	PBANKA_0100800.1-p1	0	26	S6(Phospho): 100
	iLScVsk	1	PBANKA_0100800		zinc finger protein, putative	PBANKA_0100800.1-p1	0	23	S6(Phospho): 100
TMDSIFK	1xTMT6plex [K7]; 1xTMT6plex [N-Term]; 1xPhospho [S4(100)]	1	PBANKA_0100800		zinc finger protein, putative	0	-0.02	-0.25	0.32	-0.37	-0.04							16
	Annotated Sequence	# Proteins	Master Protein Accessions			Protein Accessions	# Missed Cleavages	Ions Score	ptmRS: Best Site Probabilities
	tMDsIFk	1	PBANKA_0100800		zinc finger protein, putative	PBANKA_0100800.1-p1	0	16	S4(Phospho): 100
SMNSALFQYSSSIFNNAWSK	1xTMT6plex [K20]; 1xTMT6plex [N-Term]; 1xPhospho [S4(100)]	2	PBANKA_0100800		zinc finger protein, putative	0	-0.45	-0.24	-0.2	-0.58	-0.37							44
	Annotated Sequence	# Proteins	Master Protein Accessions			Protein Accessions	# Missed Cleavages	Ions Score	ptmRS: Best Site Probabilities
	sMNsALFQYSSSIFNNAWSk	1	PBANKA_0100800		zinc finger protein, putative	PBANKA_0100800.1-p1	0	44	S4(Phospho): 100
	sMNSALFQYSSsIFNNAWSk	1	PBANKA_0100800		zinc finger protein, putative	PBANKA_0100800.1-p1	0	43	S10(Phospho): 33.33; S11(Phospho): 33.33; S12(Phospho): 33.33
NNTDVLCPNTPSNNNLFK	1xCarbamidomethyl [C7]; 1xTMT6plex [K18]; 1xTMT6plex [N-Term]; 1xPhospho [S12(100)]	1	PBANKA_0100800		zinc finger protein, putative	0	0.06	-0.25	-0.14	-0.06	-0.13							40
	Annotated Sequence	# Proteins	Master Protein Accessions			Protein Accessions	# Missed Cleavages	Ions Score	ptmRS: Best Site Probabilities
	nNTDVLcPNTPsNNNLFk	1	PBANKA_0100800		zinc finger protein, putative	PBANKA_0100800.1-p1	0	40	S12(Phospho): 100
TISQPLNK	1xTMT6plex [K8]; 1xTMT6plex [N-Term]; 1xPhospho [S3(100)]	4	PBANKA_0102300	CAX	cation/H+ antiporter	0	-0.22	-0.37	-0.21	-0.42	-0.26	1	1	1	1	1		24
	Annotated Sequence	# Proteins	Master Protein Accessions			Protein Accessions	# Missed Cleavages	Ions Score	ptmRS: Best Site Probabilities
	tIsQPLNk	1	PBANKA_0102300	CAX	cation/H+ antiporter	PBANKA_0102300.1-p1	0	24	S3(Phospho): 100
	tIsQPLNk	1	PBANKA_0102300	CAX	cation/H+ antiporter	PBANKA_0102300.1-p1	0	21	S3(Phospho): 100
	tIsQPLNk	1	PBANKA_0102300	CAX	cation/H+ antiporter	PBANKA_0102300.1-p1	0	21	S3(Phospho): 100
	tIsQPLNk	1	PBANKA_0102300	CAX	cation/H+ antiporter	PBANKA_0102300.1-p1	0	16	S3(Phospho): 100
RTISQPLNK	1xTMT6plex [K9]; 1xTMT6plex [N-Term]; 1xPhospho [S4(100)]	3	PBANKA_0102300	CAX	cation/H+ antiporter	1	-0.2	-0.35	-0.12	-0.21	-0.05	1	1	1	1	1		31
	Annotated Sequence	# Proteins	Master Protein Accessions			Protein Accessions	# Missed Cleavages	Ions Score	ptmRS: Best Site Probabilities
	rTIsQPLNk	1	PBANKA_0102300	CAX	cation/H+ antiporter	PBANKA_0102300.1-p1	1	31	S4(Phospho): 100
	rTIsQPLNk	1	PBANKA_0102300	CAX	cation/H+ antiporter	PBANKA_0102300.1-p1	1	28	S4(Phospho): 100
	rTIsQPLNk	1	PBANKA_0102300	CAX	cation/H+ antiporter	PBANKA_0102300.1-p1	1	24	S4(Phospho): 100
NDSDNFFANIGK	1xTMT6plex [K12]; 1xTMT6plex [N-Term]; 1xPhospho [S3(100)]	1	PBANKA_0102700		conserved Plasmodium protein, unknown function	0	-0.22	-0.27	-0.37	-0.14	0.07							38
	Annotated Sequence	# Proteins	Master Protein Accessions			Protein Accessions	# Missed Cleavages	Ions Score	ptmRS: Best Site Probabilities
	nDsDNFFANIGk	1	PBANKA_0102700		conserved Plasmodium protein, unknown function	PBANKA_0102700.1-p1	0	38	S3(Phospho): 100
MSDISPFIL	1xTMT6plex [N-Term]; 1xPhospho [S2(100)]	4	PBANKA_0102700		conserved Plasmodium protein, unknown function	0	0.28	0.85	0.53	0.66	0.52	1	0.247196	1	0.900512	1		33
	Annotated Sequence	# Proteins	Master Protein Accessions			Protein Accessions	# Missed Cleavages	Ions Score	ptmRS: Best Site Probabilities
	mSDIsPFIL	1	PBANKA_0102700		conserved Plasmodium protein, unknown function	PBANKA_0102700.1-p1	0	33	S5(Phospho): 99.6
	msDISPFIL	1	PBANKA_0102700		conserved Plasmodium protein, unknown function	PBANKA_0102700.1-p1	0	32	S2(Phospho): 100
	mSDIsPFIL	1	PBANKA_0102700		conserved Plasmodium protein, unknown function	PBANKA_0102700.1-p1	0	31	S5(Phospho): 100
	msDISPFIL	1	PBANKA_0102700		conserved Plasmodium protein, unknown function	PBANKA_0102700.1-p1	0	26	S2(Phospho): 100
QKNSYPSTR	1xTMT6plex [K2]; 1xTMT6plex [N-Term]; 1xPhospho [S4(100)]	2	PBANKA_0102700		conserved Plasmodium protein, unknown function	1	0.13	-0.12	-0.18	-0.1	0.14	1	1	1	1	1		17
	Annotated Sequence	# Proteins	Master Protein Accessions			Protein Accessions	# Missed Cleavages	Ions Score	ptmRS: Best Site Probabilities
	qkNsYPSTR	1	PBANKA_0102700		conserved Plasmodium protein, unknown function	PBANKA_0102700.1-p1	1	17	S4(Phospho): 100
	qkNsYPSTR	1	PBANKA_0102700		conserved Plasmodium protein, unknown function	PBANKA_0102700.1-p1	1	16	S4(Phospho): 100
MSDISPFIL	1xOxidation [M1]; 1xTMT6plex [N-Term]; 1xPhospho [S5(100)]	2	PBANKA_0102700		conserved Plasmodium protein, unknown function	0	-0.38	0.5	0	0.16	0.12	1	1	1	1	1		28
	Annotated Sequence	# Proteins	Master Protein Accessions			Protein Accessions	# Missed Cleavages	Ions Score	ptmRS: Best Site Probabilities
	mSDIsPFIL	1	PBANKA_0102700		conserved Plasmodium protein, unknown function	PBANKA_0102700.1-p1	0	28	S5(Phospho): 100
	mSDIsPFIL	1	PBANKA_0102700		conserved Plasmodium protein, unknown function	PBANKA_0102700.1-p1	0	24	S5(Phospho): 100
EQESFNLK	1xTMT6plex [K8]; 1xTMT6plex [N-Term]; 1xPhospho [S4(100)]	4	PBANKA_0102700		conserved Plasmodium protein, unknown function	0	0.43	0.45	0.59	0.44	0.48	1	1	1	1	1		37
	Annotated Sequence	# Proteins	Master Protein Accessions			Protein Accessions	# Missed Cleavages	Ions Score	ptmRS: Best Site Probabilities
	eQEsFNLk	1	PBANKA_0102700		conserved Plasmodium protein, unknown function	PBANKA_0102700.1-p1	0	37	S4(Phospho): 100
	eQEsFNLk	1	PBANKA_0102700		conserved Plasmodium protein, unknown function	PBANKA_0102700.1-p1	0	31	S4(Phospho): 100
	eQEsFNLk	1	PBANKA_0102700		conserved Plasmodium protein, unknown function	PBANKA_0102700.1-p1	0	29	S4(Phospho): 100
	eQEsFNLk	1	PBANKA_0102700		conserved Plasmodium protein, unknown function	PBANKA_0102700.1-p1	0	29	S4(Phospho): 100
NSYPSTR	1xTMT6plex [N-Term]; 1xPhospho [S2(100)]	4	PBANKA_0102700		conserved Plasmodium protein, unknown function	0	0.05	0.04	-0.22	-0.06	0.01	1	1	1	1	1		22
	Annotated Sequence	# Proteins	Master Protein Accessions			Protein Accessions	# Missed Cleavages	Ions Score	ptmRS: Best Site Probabilities
	nsYPSTR	1	PBANKA_0102700		conserved Plasmodium protein, unknown function	PBANKA_0102700.1-p1	0	22	S2(Phospho): 100
	nsYPSTR	1	PBANKA_0102700		conserved Plasmodium protein, unknown function	PBANKA_0102700.1-p1	0	20	S2(Phospho): 100
	nSYPsTR	1	PBANKA_0102700		conserved Plasmodium protein, unknown function	PBANKA_0102700.1-p1	0	19	S5(Phospho): 100
	nSYPsTR	1	PBANKA_0102700		conserved Plasmodium protein, unknown function	PBANKA_0102700.1-p1	0	14	S5(Phospho): 100
GVEKNDSDNFFANIGK	2xTMT6plex [K4; K16]; 1xTMT6plex [N-Term]; 1xPhospho [S7(100)]	1	PBANKA_0102700		conserved Plasmodium protein, unknown function	1	0.13	-0.31	-0.28	0	-0.07							33
	Annotated Sequence	# Proteins	Master Protein Accessions			Protein Accessions	# Missed Cleavages	Ions Score	ptmRS: Best Site Probabilities
	gVEkNDsDNFFANIGk	1	PBANKA_0102700		conserved Plasmodium protein, unknown function	PBANKA_0102700.1-p1	1	33	S7(Phospho): 100
QNVESENMVENDQGMANELLQK	1xTMT6plex [K22]; 1xTMT6plex [N-Term]; 1xPhospho [S5(100)]	1	PBANKA_0102700		conserved Plasmodium protein, unknown function	0											No Quan Values	69
	Annotated Sequence	# Proteins	Master Protein Accessions			Protein Accessions	# Missed Cleavages	Ions Score	ptmRS: Best Site Probabilities
	qNVEsENMVENDQGMANELLQk	1	PBANKA_0102700		conserved Plasmodium protein, unknown function	PBANKA_0102700.1-p1	0	69	S5(Phospho): 100
NENINNIASMNDDCTKESISIK	1xCarbamidomethyl [C14]; 2xTMT6plex [K16; K22]; 1xTMT6plex [N-Term]; 1xPhospho [S9(100)]	1	PBANKA_0102700		conserved Plasmodium protein, unknown function	1	0.23	0.01	0.11	0.12	0.07							38
	Annotated Sequence	# Proteins	Master Protein Accessions			Protein Accessions	# Missed Cleavages	Ions Score	ptmRS: Best Site Probabilities
	nENINNIAsMNDDcTkESISIk	1	PBANKA_0102700		conserved Plasmodium protein, unknown function	PBANKA_0102700.1-p1	1	38	S9(Phospho): 100
YIDENFLSLINESK	1xTMT6plex [K14]; 1xTMT6plex [N-Term]; 1xPhospho [S8(100)]	2	PBANKA_0102700		conserved Plasmodium protein, unknown function	0	0.49	0.66	0.89	0.59	0.48	1	1	1	1	1		54
	Annotated Sequence	# Proteins	Master Protein Accessions			Protein Accessions	# Missed Cleavages	Ions Score	ptmRS: Best Site Probabilities
	yIDENFLsLINESk	1	PBANKA_0102700		conserved Plasmodium protein, unknown function	PBANKA_0102700.1-p1	0	54	S8(Phospho): 100
	yIDENFLsLINESk	1	PBANKA_0102700		conserved Plasmodium protein, unknown function	PBANKA_0102700.1-p1	0	44	S8(Phospho): 100
QKNSYPSTR	1xTMT6plex [K2]; 1xTMT6plex [N-Term]; 2xPhospho [S4(100); S7(99.6)]	1	PBANKA_0102700		conserved Plasmodium protein, unknown function	1	0.28	0.42	0.21	0.44	-0.04							14
	Annotated Sequence	# Proteins	Master Protein Accessions			Protein Accessions	# Missed Cleavages	Ions Score	ptmRS: Best Site Probabilities
	qkNsYPsTR	1	PBANKA_0102700		conserved Plasmodium protein, unknown function	PBANKA_0102700.1-p1	1	14	S4(Phospho): 100; S7(Phospho): 99.56
TNSEKHSNEITLTQNDLK	2xTMT6plex [K5; K18]; 1xTMT6plex [N-Term]; 1xPhospho [S/T]	1	PBANKA_0103300		conserved Plasmodium protein, unknown function	1	-0.1	-0.49	-0.53	-0.2	-0.28							26
	Annotated Sequence	# Proteins	Master Protein Accessions			Protein Accessions	# Missed Cleavages	Ions Score	ptmRS: Best Site Probabilities
	tNSEkHsNEITLTQNDLk	1	PBANKA_0103300		conserved Plasmodium protein, unknown function	PBANKA_0103300.1-p1	1	26	S3(Phospho): 49.85; S7(Phospho): 49.85
GGSIGLIGGIGINTFSQNELNNNNNNNNNEFLK	1xTMT6plex [K33]; 1xTMT6plex [N-Term]; 1xPhospho [S3(100)]	1	PBANKA_0103300		conserved Plasmodium protein, unknown function	0	-0.12	-0.04	-0.18	-0.31	-0.48							22
	Annotated Sequence	# Proteins	Master Protein Accessions			Protein Accessions	# Missed Cleavages	Ions Score	ptmRS: Best Site Probabilities
	gGsIGLIGGIGINTFSQNELNNNNNNNNNEFLk	1	PBANKA_0103300		conserved Plasmodium protein, unknown function	PBANKA_0103300.1-p1	0	22	S3(Phospho): 100
IKNSLENINPR	1xTMT6plex [K2]; 1xTMT6plex [N-Term]; 1xPhospho [S4(100)]	2	PBANKA_0103300		conserved Plasmodium protein, unknown function	1	0.24	0.28	0.29	0.16	0.22	1	1	1	1	1		17
	Annotated Sequence	# Proteins	Master Protein Accessions			Protein Accessions	# Missed Cleavages	Ions Score	ptmRS: Best Site Probabilities
	ikNsLENINPR	1	PBANKA_0103300		conserved Plasmodium protein, unknown function	PBANKA_0103300.1-p1	1	17	S4(Phospho): 100
	ikNsLENINPR	1	PBANKA_0103300		conserved Plasmodium protein, unknown function	PBANKA_0103300.1-p1	1	15	S4(Phospho): 100
LSNSNNSEDNNQINDISR	1xTMT6plex [N-Term]; 1xPhospho [S7(100)]	3	PBANKA_0103300		conserved Plasmodium protein, unknown function	0	-0.24	0	-0.08	-0.2	-0.04	1	1	1	1	1		76
	Annotated Sequence	# Proteins	Master Protein Accessions			Protein Accessions	# Missed Cleavages	Ions Score	ptmRS: Best Site Probabilities
	lSNSNNsEDNNQINDISR	1	PBANKA_0103300		conserved Plasmodium protein, unknown function	PBANKA_0103300.1-p1	0	76	S7(Phospho): 100
	lSNSNNsEDNNQINDISR	1	PBANKA_0103300		conserved Plasmodium protein, unknown function	PBANKA_0103300.1-p1	0	70	S7(Phospho): 100
	lSNSNNsEDNNQINDISR	1	PBANKA_0103300		conserved Plasmodium protein, unknown function	PBANKA_0103300.1-p1	0	23	S7(Phospho): 100
LNESFDSNNALNSINKR	1xTMT6plex [K16]; 1xTMT6plex [N-Term]; 1xPhospho [S4(100)]	1	PBANKA_0103300		conserved Plasmodium protein, unknown function	1											No Quan Values	27
	Annotated Sequence	# Proteins	Master Protein Accessions			Protein Accessions	# Missed Cleavages	Ions Score	ptmRS: Best Site Probabilities
	lNEsFDSNNALNSINkR	1	PBANKA_0103300		conserved Plasmodium protein, unknown function	PBANKA_0103300.1-p1	1	27	S4(Phospho): 100
QLTSLCKLPLDESLLNFLK	1xCarbamidomethyl [C6]; 2xTMT6plex [K7; K19]; 1xTMT6plex [N-Term]; 1xPhospho [S4(99.6)]	4	PBANKA_0103300		conserved Plasmodium protein, unknown function	1	0.57	0.9	0.97	0.75	0.88	1	1	1	1	1		38
	Annotated Sequence	# Proteins	Master Protein Accessions			Protein Accessions	# Missed Cleavages	Ions Score	ptmRS: Best Site Probabilities
	qLTsLckLPLDESLLNFLk	1	PBANKA_0103300		conserved Plasmodium protein, unknown function	PBANKA_0103300.1-p1	1	38	S4(Phospho): 99.43
	qLTsLckLPLDESLLNFLk	1	PBANKA_0103300		conserved Plasmodium protein, unknown function	PBANKA_0103300.1-p1	1	34	T3(Phospho): 99.46
	qLTsLckLPLDESLLNFLk	1	PBANKA_0103300		conserved Plasmodium protein, unknown function	PBANKA_0103300.1-p1	1	17	S4(Phospho): 99.54
	qLTsLckLPLDESLLNFLk	1	PBANKA_0103300		conserved Plasmodium protein, unknown function	PBANKA_0103300.1-p1	1	15	S4(Phospho): 99.55
NIDSDNLNALVSEK	1xTMT6plex [K14]; 1xTMT6plex [N-Term]; 1xPhospho [S4(100)]	2	PBANKA_0103300		conserved Plasmodium protein, unknown function	0	0.26	-0.43	0.1	-0.33	-0.07							30
	Annotated Sequence	# Proteins	Master Protein Accessions			Protein Accessions	# Missed Cleavages	Ions Score	ptmRS: Best Site Probabilities
	nIDsDNLNALVSEk	1	PBANKA_0103300		conserved Plasmodium protein, unknown function	PBANKA_0103300.1-p1	0	30	S4(Phospho): 100
	nIDsDNLNALVSEk	1	PBANKA_0103300		conserved Plasmodium protein, unknown function	PBANKA_0103300.1-p1	0	24	S4(Phospho): 100
NSEISSPQNSASNLNTSTNIEKR	1xTMT6plex [K22]; 1xTMT6plex [N-Term]; 1xPhospho [S/T]	2	PBANKA_0103300		conserved Plasmodium protein, unknown function	1	-0.3	-0.4	-0.31	-0.25	-0.22	1	1	1	1	1		58
	Annotated Sequence	# Proteins	Master Protein Accessions			Protein Accessions	# Missed Cleavages	Ions Score	ptmRS: Best Site Probabilities
	nSEISsPQNSASNLNTSTNIEkR	1	PBANKA_0103300		conserved Plasmodium protein, unknown function	PBANKA_0103300.1-p1	1	58	S5(Phospho): 50; S6(Phospho): 50
	nSEISsPQNSASNLNTSTNIEkR	1	PBANKA_0103300		conserved Plasmodium protein, unknown function	PBANKA_0103300.1-p1	1	24	S5(Phospho): 50; S6(Phospho): 50
SYSHMENDEGVDPNNNSEGEVSFKR	1xOxidation [M5]; 1xTMT6plex [K24]; 1xTMT6plex [N-Term]; 1xPhospho [S3(99.3)]	1	PBANKA_0103900		RNA-binding protein, putative	1	0	0.09	-0.26	-0.28	0.05							22
	Annotated Sequence	# Proteins	Master Protein Accessions			Protein Accessions	# Missed Cleavages	Ions Score	ptmRS: Best Site Probabilities
	sYsHmENDEGVDPNNNSEGEVSFkR	1	PBANKA_0103900		RNA-binding protein, putative	PBANKA_0103900.1-p1	1	22	S3(Phospho): 99.3
NKENNYYDNYSNNNMDDYDNFSVPR	1xTMT6plex [K2]; 1xTMT6plex [N-Term]; 1xPhospho [S11(99.2)]	3	PBANKA_0103900		RNA-binding protein, putative	1	-0.18	-0.32	-0.14	-0.3	-0.42	1	1	1	1	1		46
	Annotated Sequence	# Proteins	Master Protein Accessions			Protein Accessions	# Missed Cleavages	Ions Score	ptmRS: Best Site Probabilities
	nkENNYYDNYsNNNMDDYDNFSVPR	1	PBANKA_0103900		RNA-binding protein, putative	PBANKA_0103900.1-p1	1	46	S11(Phospho): 99.17
	nkENNYYDNYsNNNMDDYDNFSVPR	1	PBANKA_0103900		RNA-binding protein, putative	PBANKA_0103900.1-p1	1	26	Y10(Phospho): 49.85; S11(Phospho): 49.85
	nkENNYYDNYsNNNMDDYDNFSVPR	1	PBANKA_0103900		RNA-binding protein, putative	PBANKA_0103900.1-p1	1	22	S11(Phospho): 99.33
SYSHMENDEGVDPNNNSEGEVSFK	1xTMT6plex [K24]; 1xTMT6plex [N-Term]; 1xPhospho [S/Y]	2	PBANKA_0103900		RNA-binding protein, putative	0	-0.06	0.02	-0.04	0.09	-0.08							33
	Annotated Sequence	# Proteins	Master Protein Accessions			Protein Accessions	# Missed Cleavages	Ions Score	ptmRS: Best Site Probabilities
	sYSHMENDEGVDPNNNSEGEVSFk	1	PBANKA_0103900		RNA-binding protein, putative	PBANKA_0103900.1-p1	0	33	S1(Phospho): 99.99
	sYsHMENDEGVDPNNNSEGEVSFk	1	PBANKA_0103900		RNA-binding protein, putative	PBANKA_0103900.1-p1	0	19	S1(Phospho): 50; S3(Phospho): 50
SYSHMENDEGVDPNNNSEGEVSFKR	1xTMT6plex [K24]; 1xTMT6plex [N-Term]; 1xPhospho [S1(100)]	2	PBANKA_0103900		RNA-binding protein, putative	1	-0.15	0.12	0.2	0.1	0.02							24
	Annotated Sequence	# Proteins	Master Protein Accessions			Protein Accessions	# Missed Cleavages	Ions Score	ptmRS: Best Site Probabilities
	sYSHMENDEGVDPNNNSEGEVSFkR	1	PBANKA_0103900		RNA-binding protein, putative	PBANKA_0103900.1-p1	1	24	S1(Phospho): 100
	sYSHMENDEGVDPNNNSEGEVSFkR	1	PBANKA_0103900		RNA-binding protein, putative	PBANKA_0103900.1-p1	1	24	S1(Phospho): 100
SYSHMENDEGVDPNNNSEGEVSFK	1xTMT6plex [K24]; 1xTMT6plex [N-Term]; 2xPhospho [S1(99.5); S17(100)]	2	PBANKA_0103900		RNA-binding protein, putative	0	-0.08	0.29	-0.24	-0.19	-0.24							39
	Annotated Sequence	# Proteins	Master Protein Accessions			Protein Accessions	# Missed Cleavages	Ions Score	ptmRS: Best Site Probabilities
	sYSHMENDEGVDPNNNsEGEVSFk	1	PBANKA_0103900		RNA-binding protein, putative	PBANKA_0103900.1-p1	0	39	S1(Phospho): 99.48; S17(Phospho): 100
	sYsHMENDEGVDPNNNsEGEVSFk	1	PBANKA_0103900		RNA-binding protein, putative	PBANKA_0103900.1-p1	0	13	S1(Phospho): 50; S3(Phospho): 50; S17(Phospho): 100
SYSHMENDEGVDPNNNSEGEVSFK	1xOxidation [M5]; 1xTMT6plex [K24]; 1xTMT6plex [N-Term]; 1xPhospho [S3(99.4)]	1	PBANKA_0103900		RNA-binding protein, putative	0	-0.05	-0.14	-0.63	-0.18	0.17							15
	Annotated Sequence	# Proteins	Master Protein Accessions			Protein Accessions	# Missed Cleavages	Ions Score	ptmRS: Best Site Probabilities
	sYsHmENDEGVDPNNNSEGEVSFk	1	PBANKA_0103900		RNA-binding protein, putative	PBANKA_0103900.1-p1	0	15	S3(Phospho): 99.38
SYSHMENDEGVDPNNNSEGEVSFKR	1xTMT6plex [K24]; 1xTMT6plex [N-Term]; 2xPhospho [S1(100); S17(100)]	2	PBANKA_0103900		RNA-binding protein, putative	1	0.04	0.08	0.15	-0.03	-0.15	1	1	1	1	1		35
	Annotated Sequence	# Proteins	Master Protein Accessions			Protein Accessions	# Missed Cleavages	Ions Score	ptmRS: Best Site Probabilities
	sYSHMENDEGVDPNNNsEGEVSFkR	1	PBANKA_0103900		RNA-binding protein, putative	PBANKA_0103900.1-p1	1	35	S1(Phospho): 100; S17(Phospho): 100
	sYSHMENDEGVDPNNNsEGEVSFkR	1	PBANKA_0103900		RNA-binding protein, putative	PBANKA_0103900.1-p1	1	33	S1(Phospho): 99.99; S17(Phospho): 100
NKENNYYDNYSNNNMDDYDNFSVPR	1xOxidation [M15]; 1xTMT6plex [K2]; 1xTMT6plex [N-Term]; 1xPhospho [S11(99.4)]	1	PBANKA_0103900		RNA-binding protein, putative	1	-0.31	0.08	-0.53	-0.27	-0.45							35
	Annotated Sequence	# Proteins	Master Protein Accessions			Protein Accessions	# Missed Cleavages	Ions Score	ptmRS: Best Site Probabilities
	nkENNYYDNYsNNNmDDYDNFSVPR	1	PBANKA_0103900		RNA-binding protein, putative	PBANKA_0103900.1-p1	1	35	S11(Phospho): 99.35
CNPVGSFSDANFINIENETEINDNVK	1xCarbamidomethyl [C1]; 1xTMT6plex [K26]; 1xTMT6plex [N-Term]; 1xPhospho [S6(100)]	4	PBANKA_0104400		nucleoside diphosphate kinase, putative	0	-0.11	-0.07	0.17	-0.09	-0.32	1	1	1	1	1		118
	Annotated Sequence	# Proteins	Master Protein Accessions			Protein Accessions	# Missed Cleavages	Ions Score	ptmRS: Best Site Probabilities
	cNPVGsFSDANFINIENETEINDNVk	1	PBANKA_0104400		nucleoside diphosphate kinase, putative	PBANKA_0104400.1-p1	0	118	S6(Phospho): 100
	cNPVGsFSDANFINIENETEINDNVk	1	PBANKA_0104400		nucleoside diphosphate kinase, putative	PBANKA_0104400.1-p1	0	75	S6(Phospho): 100
	cNPVGsFSDANFINIENETEINDNVk	1	PBANKA_0104400		nucleoside diphosphate kinase, putative	PBANKA_0104400.1-p1	0	57	S6(Phospho): 100
	cNPVGsFSDANFINIENETEINDNVk	1	PBANKA_0104400		nucleoside diphosphate kinase, putative	PBANKA_0104400.1-p1	0	38	S6(Phospho): 100
GINIEQFEEIISGKPSFSNNYK	2xTMT6plex [K14; K22]; 1xTMT6plex [N-Term]; 1xPhospho [S16(100)]	7	PBANKA_0104400		nucleoside diphosphate kinase, putative	0	0.42	0.61	0.64	0.43	0.56	1	1	1	1	1		44
	Annotated Sequence	# Proteins	Master Protein Accessions			Protein Accessions	# Missed Cleavages	Ions Score	ptmRS: Best Site Probabilities
	gINIEQFEEIISGkPsFSNNYk	1	PBANKA_0104400		nucleoside diphosphate kinase, putative	PBANKA_0104400.1-p1	0	44	S16(Phospho): 100
	gINIEQFEEIISGkPSFsNNYk	1	PBANKA_0104400		nucleoside diphosphate kinase, putative	PBANKA_0104400.1-p1	0	41	S18(Phospho): 99.99
	gINIEQFEEIISGkPSFsNNYk	1	PBANKA_0104400		nucleoside diphosphate kinase, putative	PBANKA_0104400.1-p1	0	37	S16(Phospho): 100
	gINIEQFEEIIsGkPSFSNNYk	1	PBANKA_0104400		nucleoside diphosphate kinase, putative	PBANKA_0104400.1-p1	0	33	S12(Phospho): 100
	gINIEQFEEIISGkPSFsNNYk	1	PBANKA_0104400		nucleoside diphosphate kinase, putative	PBANKA_0104400.1-p1	0	32	S16(Phospho): 100
	gINIEQFEEIIsGkPSFSNNYk	1	PBANKA_0104400		nucleoside diphosphate kinase, putative	PBANKA_0104400.1-p1	0	24	S12(Phospho): 100
	gINIEQFEEIISGkPsFSNNYk	1	PBANKA_0104400		nucleoside diphosphate kinase, putative	PBANKA_0104400.1-p1	0	16	S16(Phospho): 99.4
HIESDYVNIEEIKSDSCLTEK	1xCarbamidomethyl [C17]; 2xTMT6plex [K13; K21]; 1xTMT6plex [N-Term]; 1xPhospho [S4(100)]	5	PBANKA_0104400		nucleoside diphosphate kinase, putative	1	0.01	0.13	0.15	0.1	0.17	1	1	1	1	1		38
	Annotated Sequence	# Proteins	Master Protein Accessions			Protein Accessions	# Missed Cleavages	Ions Score	ptmRS: Best Site Probabilities
	hIEsDYVNIEEIkSDScLTEk	1	PBANKA_0104400		nucleoside diphosphate kinase, putative	PBANKA_0104400.1-p1	1	38	S4(Phospho): 100
	hIEsDYVNIEEIkSDScLTEk	1	PBANKA_0104400		nucleoside diphosphate kinase, putative	PBANKA_0104400.1-p1	1	34	S4(Phospho): 100
	hIESDYVNIEEIksDScLTEk	1	PBANKA_0104400		nucleoside diphosphate kinase, putative	PBANKA_0104400.1-p1	1	30	S14(Phospho): 99.58
	hIEsDYVNIEEIkSDScLTEk	1	PBANKA_0104400		nucleoside diphosphate kinase, putative	PBANKA_0104400.1-p1	1	21	S4(Phospho): 100
	hIESDYVNIEEIksDScLTEk	1	PBANKA_0104400		nucleoside diphosphate kinase, putative	PBANKA_0104400.1-p1	1	21	S14(Phospho): 99.48
SDSCLTEKASK	1xCarbamidomethyl [C4]; 2xTMT6plex [K8; K11]; 1xTMT6plex [N-Term]; 1xPhospho [S10(100)]	1	PBANKA_0104400		nucleoside diphosphate kinase, putative	1	0.73	0.17	0.12	0.45	-0.18							18
	Annotated Sequence	# Proteins	Master Protein Accessions			Protein Accessions	# Missed Cleavages	Ions Score	ptmRS: Best Site Probabilities
	sDScLTEkAsk	1	PBANKA_0104400		nucleoside diphosphate kinase, putative	PBANKA_0104400.1-p1	1	18	S10(Phospho): 100
HIESDYVNIEEIK	1xTMT6plex [K13]; 1xTMT6plex [N-Term]; 1xPhospho [S4(100)]	2	PBANKA_0104400		nucleoside diphosphate kinase, putative	0	0.14	0.09	0.14	0.17	-0.05	1	1	1	1	1		43
	Annotated Sequence	# Proteins	Master Protein Accessions			Protein Accessions	# Missed Cleavages	Ions Score	ptmRS: Best Site Probabilities
	hIEsDYVNIEEIk	1	PBANKA_0104400		nucleoside diphosphate kinase, putative	PBANKA_0104400.1-p1	0	43	S4(Phospho): 100
	hIEsDYVNIEEIk	1	PBANKA_0104400		nucleoside diphosphate kinase, putative	PBANKA_0104400.1-p1	0	41	S4(Phospho): 100
HNNDICYSNKYEGYTYGDIESK	1xCarbamidomethyl [C6]; 2xTMT6plex [K10; K22]; 1xTMT6plex [N-Term]; 1xPhospho [S8(100)]	1	PBANKA_0104400		nucleoside diphosphate kinase, putative	1	0.3	0.19	0.29	0.24	0.14							47
	Annotated Sequence	# Proteins	Master Protein Accessions			Protein Accessions	# Missed Cleavages	Ions Score	ptmRS: Best Site Probabilities
	hNNDIcYsNkYEGYTYGDIESk	1	PBANKA_0104400		nucleoside diphosphate kinase, putative	PBANKA_0104400.1-p1	1	47	S8(Phospho): 100
SLITLENITNCVNKNEDILGDYLIK	1xCarbamidomethyl [C11]; 2xTMT6plex [K14; K25]; 1xTMT6plex [N-Term]; 1xPhospho [T4(100)]	1	PBANKA_0104600	RAD5	DNA repair protein RAD5, putative	1											No Quan Values	23
	Annotated Sequence	# Proteins	Master Protein Accessions			Protein Accessions	# Missed Cleavages	Ions Score	ptmRS: Best Site Probabilities
	sLItLENITNcVNkNEDILGDYLIk	1	PBANKA_0104600	RAD5	DNA repair protein RAD5, putative	PBANKA_0104600.1-p1	1	23	T4(Phospho): 100
SLITLENITNCVNK	1xCarbamidomethyl [C11]; 1xTMT6plex [K14]; 1xTMT6plex [N-Term]; 1xPhospho [T4(99.4)]	1	PBANKA_0104600	RAD5	DNA repair protein RAD5, putative	0	-0.07	-0.19	-0.31	0.12	-0.47							19
	Annotated Sequence	# Proteins	Master Protein Accessions			Protein Accessions	# Missed Cleavages	Ions Score	ptmRS: Best Site Probabilities
	sLItLENITNcVNk	1	PBANKA_0104600	RAD5	DNA repair protein RAD5, putative	PBANKA_0104600.1-p1	0	19	T4(Phospho): 99.41
KALSQCANNDYK	1xCarbamidomethyl [C6]; 2xTMT6plex [K1; K12]; 1xTMT6plex [N-Term]; 1xPhospho [S4(100)]	2	PBANKA_0104800		conserved Plasmodium protein, unknown function	1	-0.35	-0.32	-0.3	-0.04	-0.45							22
	Annotated Sequence	# Proteins	Master Protein Accessions			Protein Accessions	# Missed Cleavages	Ions Score	ptmRS: Best Site Probabilities
	kALsQcANNDYk	1	PBANKA_0104800		conserved Plasmodium protein, unknown function	PBANKA_0104800.1-p1	1	22	S4(Phospho): 100
	kALsQcANNDYk	1	PBANKA_0104800		conserved Plasmodium protein, unknown function	PBANKA_0104800.1-p1	1	17	S4(Phospho): 100
QGSIHGGK	1xTMT6plex [K8]; 1xTMT6plex [N-Term]; 1xPhospho [S3(100)]	2	PBANKA_0104800		conserved Plasmodium protein, unknown function	0	0.06	-0.51	-0.59	0.39	0.56	1	1	1	1	1		30
	Annotated Sequence	# Proteins	Master Protein Accessions			Protein Accessions	# Missed Cleavages	Ions Score	ptmRS: Best Site Probabilities
	qGsIHGGk	1	PBANKA_0104800		conserved Plasmodium protein, unknown function	PBANKA_0104800.1-p1	0	30	S3(Phospho): 100
	qGsIHGGk	1	PBANKA_0104800		conserved Plasmodium protein, unknown function	PBANKA_0104800.1-p1	0	22	S3(Phospho): 100
IGINDDNNSISSKK	2xTMT6plex [K13; K14]; 1xTMT6plex [N-Term]; 1xPhospho [S9(100)]	3	PBANKA_0104800		conserved Plasmodium protein, unknown function	1	-0.09	-0.29	-0.22	-0.22	-0.08	1	1	1	1	1		38
	Annotated Sequence	# Proteins	Master Protein Accessions			Protein Accessions	# Missed Cleavages	Ions Score	ptmRS: Best Site Probabilities
	iGINDDNNsISSkk	1	PBANKA_0104800		conserved Plasmodium protein, unknown function	PBANKA_0104800.1-p1	1	38	S9(Phospho): 100
	iGINDDNNsISSkk	1	PBANKA_0104800		conserved Plasmodium protein, unknown function	PBANKA_0104800.1-p1	1	36	S9(Phospho): 100
	iGINDDNNsISSkk	1	PBANKA_0104800		conserved Plasmodium protein, unknown function	PBANKA_0104800.1-p1	1	26	S9(Phospho): 99.31
NMNINITNLNSLER	1xTMT6plex [N-Term]; 1xPhospho [S11(100)]	4	PBANKA_0104800		conserved Plasmodium protein, unknown function	0	-0.18	-0.16	-0.23	-0.28	-0.27	1	1	1	1	1		62
	Annotated Sequence	# Proteins	Master Protein Accessions			Protein Accessions	# Missed Cleavages	Ions Score	ptmRS: Best Site Probabilities
	nMNINITNLNsLER	1	PBANKA_0104800		conserved Plasmodium protein, unknown function	PBANKA_0104800.1-p1	0	62	S11(Phospho): 100
	nMNINITNLNsLER	1	PBANKA_0104800		conserved Plasmodium protein, unknown function	PBANKA_0104800.1-p1	0	53	S11(Phospho): 100
	nMNINITNLNsLER	1	PBANKA_0104800		conserved Plasmodium protein, unknown function	PBANKA_0104800.1-p1	0	45	S11(Phospho): 100
	nMNINITNLNsLER	1	PBANKA_0104800		conserved Plasmodium protein, unknown function	PBANKA_0104800.1-p1	0	21	S11(Phospho): 100
GNSSIMDADSYNLNK	1xOxidation [M6]; 1xTMT6plex [K15]; 1xTMT6plex [N-Term]; 1xPhospho [S3(99.5)]	2	PBANKA_0104800		conserved Plasmodium protein, unknown function	0	-0.13	-0.06	-0.4	-0.23	-0.25							16
	Annotated Sequence	# Proteins	Master Protein Accessions			Protein Accessions	# Missed Cleavages	Ions Score	ptmRS: Best Site Probabilities
	gNsSImDADSYNLNk	1	PBANKA_0104800		conserved Plasmodium protein, unknown function	PBANKA_0104800.1-p1	0	16	S3(Phospho): 99.5
	gNsSImDADSYNLNk	1	PBANKA_0104800		conserved Plasmodium protein, unknown function	PBANKA_0104800.1-p1	0	14	S3(Phospho): 99.5
GNSSIMDADSYNLNK	1xTMT6plex [K15]; 1xTMT6plex [N-Term]; 1xPhospho [S3(99.7)]	2	PBANKA_0104800		conserved Plasmodium protein, unknown function	0	-0.38	-0.48	-0.46	-0.54	-0.42	1	0.45862	0.399975	0.343017	1		37
	Annotated Sequence	# Proteins	Master Protein Accessions			Protein Accessions	# Missed Cleavages	Ions Score	ptmRS: Best Site Probabilities
	gNsSIMDADSYNLNk	1	PBANKA_0104800		conserved Plasmodium protein, unknown function	PBANKA_0104800.1-p1	0	37	S3(Phospho): 99.72
	gNsSIMDADSYNLNk	1	PBANKA_0104800		conserved Plasmodium protein, unknown function	PBANKA_0104800.1-p1	0	30	S3(Phospho): 99.72
TNVGISNNASDFENFDDKK	2xTMT6plex [K18; K19]; 1xTMT6plex [N-Term]; 1xPhospho [S10(100)]	2	PBANKA_0104800		conserved Plasmodium protein, unknown function	1	-0.23	-0.5	-0.49	-0.39	-0.58	1	1	1	1	1		49
	Annotated Sequence	# Proteins	Master Protein Accessions			Protein Accessions	# Missed Cleavages	Ions Score	ptmRS: Best Site Probabilities
	tNVGISNNAsDFENFDDkk	1	PBANKA_0104800		conserved Plasmodium protein, unknown function	PBANKA_0104800.1-p1	1	49	S10(Phospho): 100
	tNVGISNNAsDFENFDDkk	1	PBANKA_0104800		conserved Plasmodium protein, unknown function	PBANKA_0104800.1-p1	1	48	S10(Phospho): 100
TQLSICNNLNKK	1xCarbamidomethyl [C6]; 2xTMT6plex [K11; K12]; 1xTMT6plex [N-Term]; 1xPhospho [S4(100)]	2	PBANKA_0104900		RNA-binding protein, putative	1	-0.11	-0.27	0.02	-0.28	-0.02							19
	Annotated Sequence	# Proteins	Master Protein Accessions			Protein Accessions	# Missed Cleavages	Ions Score	ptmRS: Best Site Probabilities
	tQLsIcNNLNkk	1	PBANKA_0104900		RNA-binding protein, putative	PBANKA_0104900.1-p1	1	19	S4(Phospho): 100
	tQLsIcNNLNkk	1	PBANKA_0104900		RNA-binding protein, putative	PBANKA_0104900.1-p1	1	14	S4(Phospho): 100
TQLSICNNLNK	1xCarbamidomethyl [C6]; 1xTMT6plex [K11]; 1xTMT6plex [N-Term]; 1xPhospho [S4(100)]	3	PBANKA_0104900		RNA-binding protein, putative	0	-0.26	-0.17	-0.15	-0.26	-0.17	1	1	1	1	1		45
	Annotated Sequence	# Proteins	Master Protein Accessions			Protein Accessions	# Missed Cleavages	Ions Score	ptmRS: Best Site Probabilities
	tQLsIcNNLNk	1	PBANKA_0104900		RNA-binding protein, putative	PBANKA_0104900.1-p1	0	45	S4(Phospho): 100
	tQLsIcNNLNk	1	PBANKA_0104900		RNA-binding protein, putative	PBANKA_0104900.1-p1	0	29	S4(Phospho): 100
	tQLsIcNNLNk	1	PBANKA_0104900		RNA-binding protein, putative	PBANKA_0104900.1-p1	0	25	S4(Phospho): 100
CSISGDIDSFIGK	1xCarbamidomethyl [C1]; 1xTMT6plex [K13]; 1xTMT6plex [N-Term]; 1xPhospho [S4(100)]	3	PBANKA_0105200	PTB	polypyrimidine tract-binding protein, putative	0	-0.14	-0.28	-0.19	-0.23	-0.11	1	1	1	1	1		54
	Annotated Sequence	# Proteins	Master Protein Accessions			Protein Accessions	# Missed Cleavages	Ions Score	ptmRS: Best Site Probabilities
	cSIsGDIDSFIGk	1	PBANKA_0105200	PTB	polypyrimidine tract-binding protein, putative	PBANKA_0105200.1-p1	0	54	S4(Phospho): 100
	cSIsGDIDSFIGk	1	PBANKA_0105200	PTB	polypyrimidine tract-binding protein, putative	PBANKA_0105200.1-p1	0	33	S4(Phospho): 100
	cSIsGDIDSFIGk	1	PBANKA_0105200	PTB	polypyrimidine tract-binding protein, putative	PBANKA_0105200.1-p1	0	22	S4(Phospho): 100
NNFSFQTSHGVLPTPTR	1xTMT6plex [N-Term]; 1xPhospho [T/S]	1	PBANKA_0105200	PTB	polypyrimidine tract-binding protein, putative	0	-0.08	-0.2	-0.12	-0.02	-0.09							39
	Annotated Sequence	# Proteins	Master Protein Accessions			Protein Accessions	# Missed Cleavages	Ions Score	ptmRS: Best Site Probabilities
	nNFSFQTsHGVLPTPTR	1	PBANKA_0105200	PTB	polypyrimidine tract-binding protein, putative	PBANKA_0105200.1-p1	0	39	T7(Phospho): 50; S8(Phospho): 50
NESINLDSSFFDTK	1xTMT6plex [K14]; 1xTMT6plex [N-Term]; 1xPhospho [S3(100)]	2	PBANKA_0105300		conserved Plasmodium protein, unknown function	0	0.1	0.26	0.34	0.27	0.26	1	1	1	1	1		49
	Annotated Sequence	# Proteins	Master Protein Accessions			Protein Accessions	# Missed Cleavages	Ions Score	ptmRS: Best Site Probabilities
	nEsINLDSSFFDTk	1	PBANKA_0105300		conserved Plasmodium protein, unknown function	PBANKA_0105300.1-p1	0	49	S3(Phospho): 100
	nEsINLDSSFFDTk	1	PBANKA_0105300		conserved Plasmodium protein, unknown function	PBANKA_0105300.1-p1	0	30	S3(Phospho): 100
KNESINLDSSFFDTK	2xTMT6plex [K1; K15]; 1xTMT6plex [N-Term]; 1xPhospho [S4(100)]	3	PBANKA_0105300		conserved Plasmodium protein, unknown function	1	0.23	0.16	0.35	0.05	0.3							83
	Annotated Sequence	# Proteins	Master Protein Accessions			Protein Accessions	# Missed Cleavages	Ions Score	ptmRS: Best Site Probabilities
	kNEsINLDSSFFDTk	1	PBANKA_0105300		conserved Plasmodium protein, unknown function	PBANKA_0105300.1-p1	1	83	S4(Phospho): 100
	kNEsINLDSSFFDTk	1	PBANKA_0105300		conserved Plasmodium protein, unknown function	PBANKA_0105300.1-p1	1	55	S4(Phospho): 100
	kNEsINLDSSFFDTk	1	PBANKA_0105300		conserved Plasmodium protein, unknown function	PBANKA_0105300.1-p1	1	29	S4(Phospho): 100
SGDTNTELSLVNK	1xTMT6plex [K13]; 1xTMT6plex [N-Term]; 1xPhospho [T4(99.7)]	2	PBANKA_0105300		conserved Plasmodium protein, unknown function	0	0.16	0.08	0.24	0.12	0.16	1	1	1	1	1		25
	Annotated Sequence	# Proteins	Master Protein Accessions			Protein Accessions	# Missed Cleavages	Ions Score	ptmRS: Best Site Probabilities
	sGDtNTELSLVNk	1	PBANKA_0105300		conserved Plasmodium protein, unknown function	PBANKA_0105300.1-p1	0	25	T4(Phospho): 99.72
	sGDtNTELSLVNk	1	PBANKA_0105300		conserved Plasmodium protein, unknown function	PBANKA_0105300.1-p1	0	24	T4(Phospho): 100
YDDNFIDNIISKISLTDNK	2xTMT6plex [K12; K19]; 1xTMT6plex [N-Term]; 1xPhospho [S14(98.6)]	3	PBANKA_0105300		conserved Plasmodium protein, unknown function	1	-0.01	0.26	0.2	0.25	0.28	1	1	1	1	1		30
	Annotated Sequence	# Proteins	Master Protein Accessions			Protein Accessions	# Missed Cleavages	Ions Score	ptmRS: Best Site Probabilities
	yDDNFIDNIISkISLtDNk	1	PBANKA_0105300		conserved Plasmodium protein, unknown function	PBANKA_0105300.1-p1	1	30	S14(Phospho): 100
	yDDNFIDNIISkIsLTDNk	1	PBANKA_0105300		conserved Plasmodium protein, unknown function	PBANKA_0105300.1-p1	1	18	S14(Phospho): 98.6
	yDDNFIDNIISkIsLTDNk	1	PBANKA_0105300		conserved Plasmodium protein, unknown function	PBANKA_0105300.1-p1	1	16	S14(Phospho): 99.21
MDTSDIIIK	1xTMT6plex [K9]; 1xTMT6plex [N-Term]; 1xPhospho [T3(100)]	1	PBANKA_0105300		conserved Plasmodium protein, unknown function	0	-0.04	-0.1	0.02	0.15	-0.1							15
	Annotated Sequence	# Proteins	Master Protein Accessions			Protein Accessions	# Missed Cleavages	Ions Score	ptmRS: Best Site Probabilities
	mDtSDIIIk	1	PBANKA_0105300		conserved Plasmodium protein, unknown function	PBANKA_0105300.1-p1	0	15	T3(Phospho): 100
RASIVELK	1xTMT6plex [K8]; 1xTMT6plex [N-Term]; 1xPhospho [S3(100)]	1	PBANKA_0105300		conserved Plasmodium protein, unknown function	1											No Quan Values	17
	Annotated Sequence	# Proteins	Master Protein Accessions			Protein Accessions	# Missed Cleavages	Ions Score	ptmRS: Best Site Probabilities
	rAsIVELk	1	PBANKA_0105300		conserved Plasmodium protein, unknown function	PBANKA_0105300.1-p1	1	17	S3(Phospho): 100
KMDTSDIIIK	2xTMT6plex [K1; K10]; 1xTMT6plex [N-Term]; 1xPhospho [T4(100)]	1	PBANKA_0105300		conserved Plasmodium protein, unknown function	1	0.21	-0.02	0.05	-0.06	0							30
	Annotated Sequence	# Proteins	Master Protein Accessions			Protein Accessions	# Missed Cleavages	Ions Score	ptmRS: Best Site Probabilities
	kMDtSDIIIk	1	PBANKA_0105300		conserved Plasmodium protein, unknown function	PBANKA_0105300.1-p1	1	30	T4(Phospho): 100
NINSFFHK	1xTMT6plex [K8]; 1xTMT6plex [N-Term]; 1xPhospho [S4(100)]	3	PBANKA_0105300		conserved Plasmodium protein, unknown function	0	-0.16	0.13	0.53	0.33	0.27	1	1	1	1	1		30
	Annotated Sequence	# Proteins	Master Protein Accessions			Protein Accessions	# Missed Cleavages	Ions Score	ptmRS: Best Site Probabilities
	nINsFFHk	1	PBANKA_0105300		conserved Plasmodium protein, unknown function	PBANKA_0105300.1-p1	0	30	S4(Phospho): 100
	nINsFFHk	1	PBANKA_0105300		conserved Plasmodium protein, unknown function	PBANKA_0105300.1-p1	0	26	S4(Phospho): 100
	nINsFFHk	1	PBANKA_0105300		conserved Plasmodium protein, unknown function	PBANKA_0105300.1-p1	0	22	S4(Phospho): 100
SGDTNTELSLVNKK	2xTMT6plex [K13; K14]; 1xTMT6plex [N-Term]; 1xPhospho [T4(100)]	2	PBANKA_0105300		conserved Plasmodium protein, unknown function	1	0.33	0.35	0.2	0.12	0.33							21
	Annotated Sequence	# Proteins	Master Protein Accessions			Protein Accessions	# Missed Cleavages	Ions Score	ptmRS: Best Site Probabilities
	sGDtNTELSLVNkk	1	PBANKA_0105300		conserved Plasmodium protein, unknown function	PBANKA_0105300.1-p1	1	21	T4(Phospho): 100
	sGDtNTELSLVNkk	1	PBANKA_0105300		conserved Plasmodium protein, unknown function	PBANKA_0105300.1-p1	1	18	T4(Phospho): 100
TNTPFDKIDSFHVK	2xTMT6plex [K7; K14]; 1xTMT6plex [N-Term]; 1xPhospho [S10(100)]	2	PBANKA_0105300		conserved Plasmodium protein, unknown function	1	0.06	-0.05	0	0.1	0.06	1	1	1	1	1		25
	Annotated Sequence	# Proteins	Master Protein Accessions			Protein Accessions	# Missed Cleavages	Ions Score	ptmRS: Best Site Probabilities
	tNTPFDkIDsFHVk	1	PBANKA_0105300		conserved Plasmodium protein, unknown function	PBANKA_0105300.1-p1	1	25	S10(Phospho): 100
	tNTPFDkIDsFHVk	1	PBANKA_0105300		conserved Plasmodium protein, unknown function	PBANKA_0105300.1-p1	1	18	S10(Phospho): 100
IDSFHVK	1xTMT6plex [K7]; 1xTMT6plex [N-Term]; 1xPhospho [S3(100)]	1	PBANKA_0105300		conserved Plasmodium protein, unknown function	0	0.21	-0.06	-0.1	0	-0.85							22
	Annotated Sequence	# Proteins	Master Protein Accessions			Protein Accessions	# Missed Cleavages	Ions Score	ptmRS: Best Site Probabilities
	iDsFHVk	1	PBANKA_0105300		conserved Plasmodium protein, unknown function	PBANKA_0105300.1-p1	0	22	S3(Phospho): 100
YKEQIGNINSNNNDLLINNQTHINSR	1xTMT6plex [K2]; 1xTMT6plex [N-Term]; 1xPhospho [S25(100)]	1	PBANKA_0105400		coatomer alpha subunit, putative	1	-0.02	-0.08	0.1	-0.07	0.28							33
	Annotated Sequence	# Proteins	Master Protein Accessions			Protein Accessions	# Missed Cleavages	Ions Score	ptmRS: Best Site Probabilities
	ykEQIGNINSNNNDLLINNQTHINsR	1	PBANKA_0105400		coatomer alpha subunit, putative	PBANKA_0105400.1-p1	1	33	S25(Phospho): 100
NLSQPFSNSPFGVLK	1xTMT6plex [K15]; 1xTMT6plex [N-Term]; 1xPhospho [S3(100)]	3	PBANKA_0105400		coatomer alpha subunit, putative	0	-0.16	-0.05	-0.16	-0.1	-0.2	1	1	1	1	1		61
	Annotated Sequence	# Proteins	Master Protein Accessions			Protein Accessions	# Missed Cleavages	Ions Score	ptmRS: Best Site Probabilities
	nLSQPFSNsPFGVLk	1	PBANKA_0105400		coatomer alpha subunit, putative	PBANKA_0105400.1-p1	0	61	S9(Phospho): 100
	nLSQPFsNSPFGVLk	1	PBANKA_0105400		coatomer alpha subunit, putative	PBANKA_0105400.1-p1	0	47	S7(Phospho): 100
	nLsQPFSNSPFGVLk	1	PBANKA_0105400		coatomer alpha subunit, putative	PBANKA_0105400.1-p1	0	39	S3(Phospho): 100
RGNISTIKPASENDTPFNTESVNYIIK	2xTMT6plex [K8; K27]; 1xTMT6plex [N-Term]; 1xPhospho [S11(100)]	2	PBANKA_0105400		coatomer alpha subunit, putative	1	-0.29	-0.09	-0.23	-0.48	-0.46							22
	Annotated Sequence	# Proteins	Master Protein Accessions			Protein Accessions	# Missed Cleavages	Ions Score	ptmRS: Best Site Probabilities
	rGNISTIkPAsENDTPFNTESVNYIIk	1	PBANKA_0105400		coatomer alpha subunit, putative	PBANKA_0105400.1-p1	1	22	S11(Phospho): 99.99
	rGNISTIkPAsENDTPFNTESVNYIIk	1	PBANKA_0105400		coatomer alpha subunit, putative	PBANKA_0105400.1-p1	1	22	S11(Phospho): 98.92
FIKNPSFELIFDK	2xTMT6plex [K3; K13]; 1xTMT6plex [N-Term]; 1xPhospho [S6(100)]	1	PBANKA_0105800		RING zinc finger protein, putative	1	0.07	0.07	0.16	0.04	0.2							40
	Annotated Sequence	# Proteins	Master Protein Accessions			Protein Accessions	# Missed Cleavages	Ions Score	ptmRS: Best Site Probabilities
	fIkNPsFELIFDk	1	PBANKA_0105800		RING zinc finger protein, putative	PBANKA_0105800.1-p1	1	40	S6(Phospho): 100
NPSFELIFDK	1xTMT6plex [K10]; 1xTMT6plex [N-Term]; 1xPhospho [S3(100)]	3	PBANKA_0105800		RING zinc finger protein, putative	0	0.15	0.11	-0.1	0.01	-0.07	1	1	1	1	1		33
	Annotated Sequence	# Proteins	Master Protein Accessions			Protein Accessions	# Missed Cleavages	Ions Score	ptmRS: Best Site Probabilities
	nPsFELIFDk	1	PBANKA_0105800		RING zinc finger protein, putative	PBANKA_0105800.1-p1	0	33	S3(Phospho): 100
	nPsFELIFDk	1	PBANKA_0105800		RING zinc finger protein, putative	PBANKA_0105800.1-p1	0	31	S3(Phospho): 100
	nPsFELIFDk	1	PBANKA_0105800		RING zinc finger protein, putative	PBANKA_0105800.1-p1	0	25	S3(Phospho): 100
LFDSESKDYIK	2xTMT6plex [K7; K11]; 1xTMT6plex [N-Term]; 1xPhospho [S6(100)]	4	PBANKA_0107200		conserved Plasmodium protein, unknown function	1	0.42	-0.01	0.07	0.22	0.1	1	1	1	1	1		29
	Annotated Sequence	# Proteins	Master Protein Accessions			Protein Accessions	# Missed Cleavages	Ions Score	ptmRS: Best Site Probabilities
	lFDSEskDYIk	1	PBANKA_0107200		conserved Plasmodium protein, unknown function	PBANKA_0107200.1-p1	1	29	S6(Phospho): 100
	lFDSEskDYIk	1	PBANKA_0107200		conserved Plasmodium protein, unknown function	PBANKA_0107200.1-p1	1	18	S6(Phospho): 100
	lFDSEskDYIk	1	PBANKA_0107200		conserved Plasmodium protein, unknown function	PBANKA_0107200.1-p1	1	15	S6(Phospho): 100
	lFDSEskDYIk	1	PBANKA_0107200		conserved Plasmodium protein, unknown function	PBANKA_0107200.1-p1	1	13	S6(Phospho): 100
YNTSPGLLER	1xTMT6plex [N-Term]; 1xPhospho [T3(99.7)]	4	PBANKA_0107200		conserved Plasmodium protein, unknown function	0	-0.09	-0.1	-0.11	-0.07	-0.12	1	1	1	1	1		38
	Annotated Sequence	# Proteins	Master Protein Accessions			Protein Accessions	# Missed Cleavages	Ions Score	ptmRS: Best Site Probabilities
	yNtSPGLLER	1	PBANKA_0107200		conserved Plasmodium protein, unknown function	PBANKA_0107200.1-p1	0	38	T3(Phospho): 99.69
	yNtSPGLLER	1	PBANKA_0107200		conserved Plasmodium protein, unknown function	PBANKA_0107200.1-p1	0	29	T3(Phospho): 100
	yNtSPGLLER	1	PBANKA_0107200		conserved Plasmodium protein, unknown function	PBANKA_0107200.1-p1	0	23	T3(Phospho): 100
	yNtSPGLLER	1	PBANKA_0107200		conserved Plasmodium protein, unknown function	PBANKA_0107200.1-p1	0	22	T3(Phospho): 100
GSSIFGK	1xTMT6plex [K7]; 1xTMT6plex [N-Term]; 1xPhospho [S2(100)]	3	PBANKA_0107200		conserved Plasmodium protein, unknown function	0	0.21	0.45	0.49	0.35	0.03	1	1	1	1	1		14
	Annotated Sequence	# Proteins	Master Protein Accessions			Protein Accessions	# Missed Cleavages	Ions Score	ptmRS: Best Site Probabilities
	gsSIFGk	1	PBANKA_0107200		conserved Plasmodium protein, unknown function	PBANKA_0107200.1-p1	0	14	S2(Phospho): 100
	gsSIFGk	1	PBANKA_0107200		conserved Plasmodium protein, unknown function	PBANKA_0107200.1-p1	0	14	S2(Phospho): 100
	gSsIFGk	1	PBANKA_0107200		conserved Plasmodium protein, unknown function	PBANKA_0107200.1-p1	0	14	S3(Phospho): 100
NIGNSKANIYYQSNR	1xTMT6plex [K6]; 1xTMT6plex [N-Term]; 1xPhospho [S5(100)]	2	PBANKA_0107200		conserved Plasmodium protein, unknown function	1	0.28	0.54	0.61	0.17	-0.04	1	1	1	1	1		41
	Annotated Sequence	# Proteins	Master Protein Accessions			Protein Accessions	# Missed Cleavages	Ions Score	ptmRS: Best Site Probabilities
	nIGNskANIYYQSNR	1	PBANKA_0107200		conserved Plasmodium protein, unknown function	PBANKA_0107200.1-p1	1	41	S5(Phospho): 100
	nIGNskANIYYQSNR	1	PBANKA_0107200		conserved Plasmodium protein, unknown function	PBANKA_0107200.1-p1	1	34	S5(Phospho): 100
HQWKGSSIFGK	2xTMT6plex [K4; K11]; 1xTMT6plex [N-Term]; 1xPhospho [S6(99.8)]	1	PBANKA_0107200		conserved Plasmodium protein, unknown function	1	0	0.45	0.45	-0.01	0.32							14
	Annotated Sequence	# Proteins	Master Protein Accessions			Protein Accessions	# Missed Cleavages	Ions Score	ptmRS: Best Site Probabilities
	hQWkGSsIFGk	1	PBANKA_0107200		conserved Plasmodium protein, unknown function	PBANKA_0107200.1-p1	1	14	S6(Phospho): 99.75
DYIKYNTSPGLLER	1xTMT6plex [K4]; 1xTMT6plex [N-Term]; 1xPhospho [T7(100)]	1	PBANKA_0107200		conserved Plasmodium protein, unknown function	1	-0.41	-0.34	-0.24	-0.59	0.28							23
	Annotated Sequence	# Proteins	Master Protein Accessions			Protein Accessions	# Missed Cleavages	Ions Score	ptmRS: Best Site Probabilities
	dYIkYNtSPGLLER	1	PBANKA_0107200		conserved Plasmodium protein, unknown function	PBANKA_0107200.1-p1	1	23	T7(Phospho): 100
SEVFSSFVYSNAEDRDK	1xTMT6plex [K17]; 1xTMT6plex [N-Term]; 1xPhospho [S6(99.6)]	1	PBANKA_0107300	CCT6	T-complex protein 1 subunit zeta, putative	1	0.19	-0.22	0.17	-0.04	0.27							19
	Annotated Sequence	# Proteins	Master Protein Accessions			Protein Accessions	# Missed Cleavages	Ions Score	ptmRS: Best Site Probabilities
	sEVFSsFVYSNAEDRDk	1	PBANKA_0107300	CCT6	T-complex protein 1 subunit zeta, putative	PBANKA_0107300.1-p1	1	19	S6(Phospho): 99.57
ADSLRSTNVLLTNINASK	1xTMT6plex [K18]; 1xTMT6plex [N-Term]; 1xPhospho [S3(100)]	2	PBANKA_0107300	CCT6	T-complex protein 1 subunit zeta, putative	1	-0.12	0.36	0.16	0.18	0.46	1	1	1	1	1		34
	Annotated Sequence	# Proteins	Master Protein Accessions			Protein Accessions	# Missed Cleavages	Ions Score	ptmRS: Best Site Probabilities
	aDSLRStNVLLTNINASk	1	PBANKA_0107300	CCT6	T-complex protein 1 subunit zeta, putative	PBANKA_0107300.1-p1	1	34	S3(Phospho): 100
	aDsLRSTNVLLTNINASk	1	PBANKA_0107300	CCT6	T-complex protein 1 subunit zeta, putative	PBANKA_0107300.1-p1	1	14	S3(Phospho): 49.86; T7(Phospho): 49.86
NTENIDGEDDTNNDDDSGSEILK	1xTMT6plex [K23]; 1xTMT6plex [N-Term]; 1xPhospho [S17(100)]	1	PBANKA_0107600	NUP637	nucleoporin NUP637, putative	0	-0.15	-0.35	-0.56	-0.34	-0.6							90
	Annotated Sequence	# Proteins	Master Protein Accessions			Protein Accessions	# Missed Cleavages	Ions Score	ptmRS: Best Site Probabilities
	nTENIDGEDDTNNDDDsGSEILk	1	PBANKA_0107600	NUP637	nucleoporin NUP637, putative	PBANKA_0107600.1-p1	0	90	S17(Phospho): 100
YVYDYLSDIDLIDTIK	1xTMT6plex [K16]; 1xTMT6plex [N-Term]; 1xPhospho [S7(100)]	2	PBANKA_0107600	NUP637	nucleoporin NUP637, putative	0	-0.24	-0.43	-0.34	-0.37	-0.38	1	1	1	1	1		49
	Annotated Sequence	# Proteins	Master Protein Accessions			Protein Accessions	# Missed Cleavages	Ions Score	ptmRS: Best Site Probabilities
	yVYDYLsDIDLIDTIk	1	PBANKA_0107600	NUP637	nucleoporin NUP637, putative	PBANKA_0107600.1-p1	0	49	S7(Phospho): 100
	yVYDYLsDIDLIDTIk	1	PBANKA_0107600	NUP637	nucleoporin NUP637, putative	PBANKA_0107600.1-p1	0	48	S7(Phospho): 100
SKYVYDYLSDIDLIDTIK	2xTMT6plex [K2; K18]; 1xTMT6plex [N-Term]; 1xPhospho [S9(100)]	2	PBANKA_0107600	NUP637	nucleoporin NUP637, putative	1	-0.28	-0.35	-0.44	-0.36	-0.22	1	1	1	1	1		39
	Annotated Sequence	# Proteins	Master Protein Accessions			Protein Accessions	# Missed Cleavages	Ions Score	ptmRS: Best Site Probabilities
	skYVYDYLsDIDLIDTIk	1	PBANKA_0107600	NUP637	nucleoporin NUP637, putative	PBANKA_0107600.1-p1	1	39	S9(Phospho): 100
	skYVYDYLsDIDLIDTIk	1	PBANKA_0107600	NUP637	nucleoporin NUP637, putative	PBANKA_0107600.1-p1	1	26	S9(Phospho): 100
ENSIDEFFNFENIK	1xTMT6plex [K14]; 1xTMT6plex [N-Term]; 1xPhospho [S3(100)]	4	PBANKA_0108200		conserved Plasmodium protein, unknown function	0	-0.13	-0.31	-0.39	-0.26	-0.32	1	1	1	1	1		64
	Annotated Sequence	# Proteins	Master Protein Accessions			Protein Accessions	# Missed Cleavages	Ions Score	ptmRS: Best Site Probabilities
	eNsIDEFFNFENIk	1	PBANKA_0108200		conserved Plasmodium protein, unknown function	PBANKA_0108200.1-p1	0	64	S3(Phospho): 100
	eNsIDEFFNFENIk	1	PBANKA_0108200		conserved Plasmodium protein, unknown function	PBANKA_0108200.1-p1	0	47	S3(Phospho): 100
	eNsIDEFFNFENIk	1	PBANKA_0108200		conserved Plasmodium protein, unknown function	PBANKA_0108200.1-p1	0	34	S3(Phospho): 100
	eNsIDEFFNFENIk	1	PBANKA_0108200		conserved Plasmodium protein, unknown function	PBANKA_0108200.1-p1	0	34	S3(Phospho): 100
LTSFEENALEHK	1xTMT6plex [K12]; 1xTMT6plex [N-Term]; 1xPhospho [S3(99.8)]	2	PBANKA_0108200		conserved Plasmodium protein, unknown function	0	-0.04	0.05	0.17	-0.06	0.03	1	1	1	1	1		42
	Annotated Sequence	# Proteins	Master Protein Accessions			Protein Accessions	# Missed Cleavages	Ions Score	ptmRS: Best Site Probabilities
	lTsFEENALEHk	1	PBANKA_0108200		conserved Plasmodium protein, unknown function	PBANKA_0108200.1-p1	0	42	S3(Phospho): 99.83
	lTsFEENALEHk	1	PBANKA_0108200		conserved Plasmodium protein, unknown function	PBANKA_0108200.1-p1	0	41	S3(Phospho): 99.74
KFSQFNDEIK	2xTMT6plex [K1; K10]; 1xTMT6plex [N-Term]; 1xPhospho [S3(100)]	2	PBANKA_0108200		conserved Plasmodium protein, unknown function	1	0.24	0.48	0.67	0.43	0.32	1	1	1	1	1		30
	Annotated Sequence	# Proteins	Master Protein Accessions			Protein Accessions	# Missed Cleavages	Ions Score	ptmRS: Best Site Probabilities
	kFsQFNDEIk	1	PBANKA_0108200		conserved Plasmodium protein, unknown function	PBANKA_0108200.1-p1	1	30	S3(Phospho): 100
	kFsQFNDEIk	1	PBANKA_0108200		conserved Plasmodium protein, unknown function	PBANKA_0108200.1-p1	1	27	S3(Phospho): 100
SGNSFFENYNK	1xTMT6plex [K11]; 1xTMT6plex [N-Term]; 1xPhospho [S4(100)]	2	PBANKA_0108200		conserved Plasmodium protein, unknown function	0	-0.1	-0.05	-0.31	0.02	-0.32	1	1	1	1	1		18
	Annotated Sequence	# Proteins	Master Protein Accessions			Protein Accessions	# Missed Cleavages	Ions Score	ptmRS: Best Site Probabilities
	sGNsFFENYNk	1	PBANKA_0108200		conserved Plasmodium protein, unknown function	PBANKA_0108200.1-p1	0	18	S4(Phospho): 100
	sGNsFFENYNk	1	PBANKA_0108200		conserved Plasmodium protein, unknown function	PBANKA_0108200.1-p1	0	17	S4(Phospho): 100
RENSIDEFFNFENIK	1xTMT6plex [K15]; 1xTMT6plex [N-Term]; 1xPhospho [S4(100)]	1	PBANKA_0108200		conserved Plasmodium protein, unknown function	1	-0.25	0.02	-0.25	-0.22	-0.29							23
	Annotated Sequence	# Proteins	Master Protein Accessions			Protein Accessions	# Missed Cleavages	Ions Score	ptmRS: Best Site Probabilities
	rENsIDEFFNFENIk	1	PBANKA_0108200		conserved Plasmodium protein, unknown function	PBANKA_0108200.1-p1	1	23	S4(Phospho): 100
SAPISAGIK	1xTMT6plex [K9]; 1xTMT6plex [N-Term]; 1xPhospho [S1(100)]	7	PBANKA_0108800		histone H3, putative	0	-0.01	-0.16	-0.04	-0.31	-0.71	1	1	1	1	1		43
	Annotated Sequence	# Proteins	Master Protein Accessions			Protein Accessions	# Missed Cleavages	Ions Score	ptmRS: Best Site Probabilities
	sAPISAGIk	1	PBANKA_0108800		histone H3, putative	PBANKA_0108800.1-p1	0	43	S1(Phospho): 100
	sAPISAGIk	1	PBANKA_0108800		histone H3, putative	PBANKA_0108800.1-p1	0	42	S1(Phospho): 100
	sAPIsAGIk	1	PBANKA_0108800		histone H3, putative	PBANKA_0108800.1-p1	0	33	S5(Phospho): 100
	sAPIsAGIk	1	PBANKA_0108800		histone H3, putative	PBANKA_0108800.1-p1	0	31	S5(Phospho): 100
	sAPISAGIk	1	PBANKA_0108800		histone H3, putative	PBANKA_0108800.1-p1	0	30	S1(Phospho): 100
	sAPIsAGIk	1	PBANKA_0108800		histone H3, putative	PBANKA_0108800.1-p1	0	28	S5(Phospho): 100
	sAPISAGIk	1	PBANKA_0108800		histone H3, putative	PBANKA_0108800.1-p1	0	22	S1(Phospho): 100
DIQLAR	1xTMT6plex [N-Term]	1	PBANKA_0108800; PBANKA_1117100			0	0.01	-0.11	-0.08	-0.03	-0.15						Shared	16
	Annotated Sequence	# Proteins	Master Protein Accessions			Protein Accessions	# Missed Cleavages	Ions Score	ptmRS: Best Site Probabilities
	dIQLAR	2	PBANKA_0108800; PBANKA_1117100			PBANKA_0108800.1-p1; PBANKA_1117100.1-p1	0	16
STDLLIR	1xTMT6plex [N-Term]; 1xPhospho [S1(100)]	2	PBANKA_0108800; PBANKA_1117100			0	0.67	1.13	1.16	1.25	0.76	1	0.10641	0.0690241	0.0740219	0.914287	Shared	23
	Annotated Sequence	# Proteins	Master Protein Accessions			Protein Accessions	# Missed Cleavages	Ions Score	ptmRS: Best Site Probabilities
	sTDLLIR	2	PBANKA_0108800; PBANKA_1117100			PBANKA_0108800.1-p1; PBANKA_1117100.1-p1	0	23	S1(Phospho): 100
	sTDLLIR	2	PBANKA_0108800; PBANKA_1117100			PBANKA_0108800.1-p1; PBANKA_1117100.1-p1	0	22	S1(Phospho): 100
STDLLIR	1xTMT6plex [N-Term]	1	PBANKA_0108800; PBANKA_1117100			0	0.21	0.04	0	-0.03	-0.03						Shared	15
	Annotated Sequence	# Proteins	Master Protein Accessions			Protein Accessions	# Missed Cleavages	Ions Score	ptmRS: Best Site Probabilities
	sTDLLIR	2	PBANKA_0108800; PBANKA_1117100			PBANKA_0108800.1-p1; PBANKA_1117100.1-p1	0	15
YRPGTVALR	1xTMT6plex [N-Term]; 1xPhospho [T5(100)]	3	PBANKA_0108800; PBANKA_1117100			0	0.43	0.86	0.88	0.65	0.73	1	1	1	1	1	Shared	25
	Annotated Sequence	# Proteins	Master Protein Accessions			Protein Accessions	# Missed Cleavages	Ions Score	ptmRS: Best Site Probabilities
	yRPGtVALR	2	PBANKA_0108800; PBANKA_1117100			PBANKA_0108800.1-p1; PBANKA_1117100.1-p1	0	25	T5(Phospho): 100
	yRPGtVALR	2	PBANKA_0108800; PBANKA_1117100			PBANKA_0108800.1-p1; PBANKA_1117100.1-p1	0	24	T5(Phospho): 100
	yRPGtVALR	2	PBANKA_0108800; PBANKA_1117100			PBANKA_0108800.1-p1; PBANKA_1117100.1-p1	0	23	T5(Phospho): 100
RVTIMPK	1xTMT6plex [K7]; 1xTMT6plex [N-Term]; 1xPhospho [T3(100)]	1	PBANKA_0108800; PBANKA_1117100			1	0.31	0.18	0.32	0.18	-0.2						Shared	16
	Annotated Sequence	# Proteins	Master Protein Accessions			Protein Accessions	# Missed Cleavages	Ions Score	ptmRS: Best Site Probabilities
	rVtIMPk	2	PBANKA_0108800; PBANKA_1117100			PBANKA_0108800.1-p1; PBANKA_1117100.1-p1	1	16	T3(Phospho): 100
YRPGTVALR	1xTMT6plex [N-Term]	2	PBANKA_0108800; PBANKA_1117100			0											Shared	31
	Annotated Sequence	# Proteins	Master Protein Accessions			Protein Accessions	# Missed Cleavages	Ions Score	ptmRS: Best Site Probabilities
	yRPGTVALR	2	PBANKA_0108800; PBANKA_1117100			PBANKA_0108800.1-p1; PBANKA_1117100.1-p1	0	31
	yRPGTVALR	2	PBANKA_0108800; PBANKA_1117100			PBANKA_0108800.1-p1; PBANKA_1117100.1-p1	0	30
LKSGTNHLAQAINK	2xTMT6plex [K2; K14]; 1xTMT6plex [N-Term]; 1xPhospho [S3(99.6)]	3	PBANKA_0109200	SPT5	transcription elongation factor SPT5, putative	1	0.24	0.46	0.44	0.25	0.27	1	1	1	1	1		21
	Annotated Sequence	# Proteins	Master Protein Accessions			Protein Accessions	# Missed Cleavages	Ions Score	ptmRS: Best Site Probabilities
	lkSGtNHLAQAINk	1	PBANKA_0109200	SPT5	transcription elongation factor SPT5, putative	PBANKA_0109200.1-p1	1	21	S3(Phospho): 99.56
	lkSGtNHLAQAINk	1	PBANKA_0109200	SPT5	transcription elongation factor SPT5, putative	PBANKA_0109200.1-p1	1	21	S3(Phospho): 100
	lkSGtNHLAQAINk	1	PBANKA_0109200	SPT5	transcription elongation factor SPT5, putative	PBANKA_0109200.1-p1	1	19	S3(Phospho): 100
KNTFQSFIGK	2xTMT6plex [K1; K10]; 1xTMT6plex [N-Term]; 1xPhospho [T3(100)]	2	PBANKA_0109200	SPT5	transcription elongation factor SPT5, putative	1	-0.16	0.18	0.15	0.05	0.12							51
	Annotated Sequence	# Proteins	Master Protein Accessions			Protein Accessions	# Missed Cleavages	Ions Score	ptmRS: Best Site Probabilities
	kNtFQSFIGk	1	PBANKA_0109200	SPT5	transcription elongation factor SPT5, putative	PBANKA_0109200.1-p1	1	51	T3(Phospho): 100
	kNtFQSFIGk	1	PBANKA_0109200	SPT5	transcription elongation factor SPT5, putative	PBANKA_0109200.1-p1	1	33	T3(Phospho): 100
SHSTIHYDITNNNLDQIYPLMDK	1xTMT6plex [K23]; 1xTMT6plex [N-Term]; 1xPhospho [S3(99.7)]	2	PBANKA_0109200	SPT5	transcription elongation factor SPT5, putative	0	-0.42	-0.23	-0.34	-0.44	-0.14	1	1	1	1	1		35
	Annotated Sequence	# Proteins	Master Protein Accessions			Protein Accessions	# Missed Cleavages	Ions Score	ptmRS: Best Site Probabilities
	sHsTIHYDITNNNLDQIYPLMDk	1	PBANKA_0109200	SPT5	transcription elongation factor SPT5, putative	PBANKA_0109200.1-p1	0	35	S3(Phospho): 99.68
	sHsTIHYDITNNNLDQIYPLMDk	1	PBANKA_0109200	SPT5	transcription elongation factor SPT5, putative	PBANKA_0109200.1-p1	0	34	S3(Phospho): 99.6
LSSIDEALQIR	1xTMT6plex [N-Term]; 1xPhospho [S3(100)]	4	PBANKA_0109200	SPT5	transcription elongation factor SPT5, putative	0	0.32	0.26	0.39	0.38	0.13	1	1	1	1	1		52
	Annotated Sequence	# Proteins	Master Protein Accessions			Protein Accessions	# Missed Cleavages	Ions Score	ptmRS: Best Site Probabilities
	lSsIDEALQIR	1	PBANKA_0109200	SPT5	transcription elongation factor SPT5, putative	PBANKA_0109200.1-p1	0	52	S3(Phospho): 100
	lSsIDEALQIR	1	PBANKA_0109200	SPT5	transcription elongation factor SPT5, putative	PBANKA_0109200.1-p1	0	52	S3(Phospho): 100
	lSsIDEALQIR	1	PBANKA_0109200	SPT5	transcription elongation factor SPT5, putative	PBANKA_0109200.1-p1	0	37	S2(Phospho): 99.63
	lSsIDEALQIR	1	PBANKA_0109200	SPT5	transcription elongation factor SPT5, putative	PBANKA_0109200.1-p1	0	33	S2(Phospho): 99.63
NNTNEEDINLHISKSFINK	2xTMT6plex [K14; K19]; 1xTMT6plex [N-Term]; 1xPhospho [S15(100)]	1	PBANKA_0109200	SPT5	transcription elongation factor SPT5, putative	1	0.23	0.1	0.31	0.26	0.3							32
	Annotated Sequence	# Proteins	Master Protein Accessions			Protein Accessions	# Missed Cleavages	Ions Score	ptmRS: Best Site Probabilities
	nNTNEEDINLHISksFINk	1	PBANKA_0109200	SPT5	transcription elongation factor SPT5, putative	PBANKA_0109200.1-p1	1	32	S15(Phospho): 100
LSSIDEALQIRR	1xTMT6plex [N-Term]; 1xPhospho [S3(99.5)]	1	PBANKA_0109200	SPT5	transcription elongation factor SPT5, putative	1	-0.48	0.69	0.66	0.08	0.32							18
	Annotated Sequence	# Proteins	Master Protein Accessions			Protein Accessions	# Missed Cleavages	Ions Score	ptmRS: Best Site Probabilities
	lSsIDEALQIRR	1	PBANKA_0109200	SPT5	transcription elongation factor SPT5, putative	PBANKA_0109200.1-p1	1	18	S3(Phospho): 99.54
NYKSADNMDDYYTSNK	2xTMT6plex [K3; K16]; 1xTMT6plex [N-Term]; 1xPhospho [S4(100)]	2	PBANKA_0109200	SPT5	transcription elongation factor SPT5, putative	1	-0.2	-0.48	-0.4	-0.21	-0.28	1	1	1	1	1		28
	Annotated Sequence	# Proteins	Master Protein Accessions			Protein Accessions	# Missed Cleavages	Ions Score	ptmRS: Best Site Probabilities
	nYksADNMDDYYTSNk	1	PBANKA_0109200	SPT5	transcription elongation factor SPT5, putative	PBANKA_0109200.1-p1	1	28	S4(Phospho): 100
	nYksADNMDDYYTSNk	1	PBANKA_0109200	SPT5	transcription elongation factor SPT5, putative	PBANKA_0109200.1-p1	1	27	S4(Phospho): 100
YVSTFLDTEAQVGDEEDEEEYASSYVDEFEEAKR	1xTMT6plex [K33]; 1xTMT6plex [N-Term]; 1xPhospho [S/Y/T]	1	PBANKA_0109200	SPT5	transcription elongation factor SPT5, putative	1	-0.45	-0.52	-0.47	-0.49	-0.64							26
	Annotated Sequence	# Proteins	Master Protein Accessions			Protein Accessions	# Missed Cleavages	Ions Score	ptmRS: Best Site Probabilities
	yVSTFLDTEAQVGDEEDEEEYASsYVDEFEEAkR	1	PBANKA_0109200	SPT5	transcription elongation factor SPT5, putative	PBANKA_0109200.1-p1	1	26	S23(Phospho): 50; S24(Phospho): 50
KTSPTYSEYK	2xTMT6plex [K1; K10]; 1xTMT6plex [N-Term]; 1xPhospho [T2(99.7)]	1	PBANKA_0109200	SPT5	transcription elongation factor SPT5, putative	1	-0.2	-0.65	-0.28	-0.34	-0.11							16
	Annotated Sequence	# Proteins	Master Protein Accessions			Protein Accessions	# Missed Cleavages	Ions Score	ptmRS: Best Site Probabilities
	kTsPTYSEYk	1	PBANKA_0109200	SPT5	transcription elongation factor SPT5, putative	PBANKA_0109200.1-p1	1	16	T2(Phospho): 99.72
YVSTFLDTEAQVGDEEDEEEYASSYVDEFEEAK	1xTMT6plex [K33]; 1xTMT6plex [N-Term]; 1xPhospho [S23(98.4)]	2	PBANKA_0109200	SPT5	transcription elongation factor SPT5, putative	0	-0.43	-0.63	-0.75	-0.31	-0.88							81
	Annotated Sequence	# Proteins	Master Protein Accessions			Protein Accessions	# Missed Cleavages	Ions Score	ptmRS: Best Site Probabilities
	yVSTFLDTEAQVGDEEDEEEYAsSYVDEFEEAk	1	PBANKA_0109200	SPT5	transcription elongation factor SPT5, putative	PBANKA_0109200.1-p1	0	81	S23(Phospho): 98.38
	yVSTFLDTEAQVGDEEDEEEYASSyVDEFEEAk	1	PBANKA_0109200	SPT5	transcription elongation factor SPT5, putative	PBANKA_0109200.1-p1	0	63	Y21(Phospho): 33.26; S23(Phospho): 33.26; S24(Phospho): 33.26
STFSSNDVLIK	1xTMT6plex [K11]; 1xTMT6plex [N-Term]; 1xPhospho [S4(99.7)]	1	PBANKA_0112100	ApiAP2	AP2 domain transcription factor, putative	0	-0.59	-0.2	0.26	-0.49	-0.25							42
	Annotated Sequence	# Proteins	Master Protein Accessions			Protein Accessions	# Missed Cleavages	Ions Score	ptmRS: Best Site Probabilities
	sTFsSNDVLIk	1	PBANKA_0112100	ApiAP2	AP2 domain transcription factor, putative	PBANKA_0112100.1-p1	0	42	S4(Phospho): 99.73
NNEIISK	1xTMT6plex [K7]; 1xTMT6plex [N-Term]; 1xPhospho [S6(100)]	1	PBANKA_0112100	ApiAP2	AP2 domain transcription factor, putative	0	-0.15	0.18	0.2	-0.21	-0.17							14
	Annotated Sequence	# Proteins	Master Protein Accessions			Protein Accessions	# Missed Cleavages	Ions Score	ptmRS: Best Site Probabilities
	nNEIIsk	1	PBANKA_0112100	ApiAP2	AP2 domain transcription factor, putative	PBANKA_0112100.1-p1	0	14	S6(Phospho): 100
RHSSIDEK	1xTMT6plex [K8]; 1xTMT6plex [N-Term]; 1xPhospho [S3(100)]	2	PBANKA_0112100	ApiAP2	AP2 domain transcription factor, putative	1	-0.83	-0.74	-0.93	-0.49	-0.58	1	1	1	1	1		22
	Annotated Sequence	# Proteins	Master Protein Accessions			Protein Accessions	# Missed Cleavages	Ions Score	ptmRS: Best Site Probabilities
	rHsSIDEk	1	PBANKA_0112100	ApiAP2	AP2 domain transcription factor, putative	PBANKA_0112100.1-p1	1	22	S3(Phospho): 100
	rHsSIDEk	1	PBANKA_0112100	ApiAP2	AP2 domain transcription factor, putative	PBANKA_0112100.1-p1	1	16	S3(Phospho): 100
NLNTPNEDEPSIPSTDDNTR	1xTMT6plex [N-Term]; 1xPhospho [S11(100)]	3	PBANKA_0201600	ETRAMP	early transcribed membrane protein	0	0.01	0.07	-0.19	-0.18	0.05	1	1	1	1	1		68
	Annotated Sequence	# Proteins	Master Protein Accessions			Protein Accessions	# Missed Cleavages	Ions Score	ptmRS: Best Site Probabilities
	nLNTPNEDEPsIPSTDDNTR	1	PBANKA_0201600	ETRAMP	early transcribed membrane protein	PBANKA_0201600.1-p1	0	68	S11(Phospho): 100
	nLNTPNEDEPSIPStDDNTR	1	PBANKA_0201600	ETRAMP	early transcribed membrane protein	PBANKA_0201600.1-p1	0	25	S14(Phospho): 49.88; T15(Phospho): 49.88
	nLNTPNEDEPsIPSTDDNTR	1	PBANKA_0201600	ETRAMP	early transcribed membrane protein	PBANKA_0201600.1-p1	0	18	S11(Phospho): 99.99
IPNIPNIPNSSGNAQSPTVSGNSIEQTAETSNVATR	1xTMT6plex [N-Term]; 1xPhospho [S23(100)]	2	PBANKA_0201600	ETRAMP	early transcribed membrane protein	0	-0.13	-0.33	-0.18	-0.14	-0.14	1	1	1	1	1		61
	Annotated Sequence	# Proteins	Master Protein Accessions			Protein Accessions	# Missed Cleavages	Ions Score	ptmRS: Best Site Probabilities
	iPNIPNIPNSSGNAQSPTVSGNsIEQTAETSNVATR	1	PBANKA_0201600	ETRAMP	early transcribed membrane protein	PBANKA_0201600.1-p1	0	61	S23(Phospho): 99.98
	iPNIPNIPNSSGNAQSPTVSGNsIEQTAETSNVATR	1	PBANKA_0201600	ETRAMP	early transcribed membrane protein	PBANKA_0201600.1-p1	0	52	S23(Phospho): 99.07
ASEESNEQPALDLPIPENTEDIENTN	1xTMT6plex [N-Term]	2	PBANKA_0201600	ETRAMP	early transcribed membrane protein	0	-0.39	-0.07	-0.12	0.14	-0.34	1	1	1	1	1		46
	Annotated Sequence	# Proteins	Master Protein Accessions			Protein Accessions	# Missed Cleavages	Ions Score	ptmRS: Best Site Probabilities
	aSEESNEQPALDLPIPENTEDIENTN	1	PBANKA_0201600	ETRAMP	early transcribed membrane protein	PBANKA_0201600.1-p1	0	46
	aSEESNEQPALDLPIPENTEDIENTN	1	PBANKA_0201600	ETRAMP	early transcribed membrane protein	PBANKA_0201600.1-p1	0	40
KNLNTPNEDEPSIPSTDDNTR	1xTMT6plex [K1]; 1xTMT6plex [N-Term]; 1xPhospho [S12(100)]	2	PBANKA_0201600	ETRAMP	early transcribed membrane protein	1	-0.19	-0.09	-0.15	-0.07	-0.25	1	1	1	1	1		50
	Annotated Sequence	# Proteins	Master Protein Accessions			Protein Accessions	# Missed Cleavages	Ions Score	ptmRS: Best Site Probabilities
	kNLNTPNEDEPsIPSTDDNTR	1	PBANKA_0201600	ETRAMP	early transcribed membrane protein	PBANKA_0201600.1-p1	1	50	S12(Phospho): 100
	kNLNTPNEDEPsIPSTDDNTR	1	PBANKA_0201600	ETRAMP	early transcribed membrane protein	PBANKA_0201600.1-p1	1	33	S12(Phospho): 99.11
ASEESNEQPALDLPIPENTEDIENTN	1xTMT6plex [N-Term]; 1xPhospho [T25(100)]	4	PBANKA_0201600	ETRAMP	early transcribed membrane protein	0	-0.23	0.04	0.02	0.22	-0.02	1	1	1	1	1		57
	Annotated Sequence	# Proteins	Master Protein Accessions			Protein Accessions	# Missed Cleavages	Ions Score	ptmRS: Best Site Probabilities
	aSEESNEQPALDLPIPENTEDIENtN	1	PBANKA_0201600	ETRAMP	early transcribed membrane protein	PBANKA_0201600.1-p1	0	57	T25(Phospho): 100
	aSEEsNEQPALDLPIPENTEDIENTN	1	PBANKA_0201600	ETRAMP	early transcribed membrane protein	PBANKA_0201600.1-p1	0	31	S5(Phospho): 100
	aSEESNEQPALDLPIPENTEDIENtN	1	PBANKA_0201600	ETRAMP	early transcribed membrane protein	PBANKA_0201600.1-p1	0	30	T25(Phospho): 99.99
	aSEEsNEQPALDLPIPENTEDIENTN	1	PBANKA_0201600	ETRAMP	early transcribed membrane protein	PBANKA_0201600.1-p1	0	14	S5(Phospho): 100
HNSFLNNNNMTK	1xOxidation [M10]; 1xTMT6plex [K12]; 1xTMT6plex [N-Term]; 1xPhospho [S3(100)]	3	PBANKA_0202500		P-loop containing nucleoside triphosphate hydrolase, putative	0	0.23	0.26	-0.09	0.09	0.1	1	1	1	1	1		26
	Annotated Sequence	# Proteins	Master Protein Accessions			Protein Accessions	# Missed Cleavages	Ions Score	ptmRS: Best Site Probabilities
	hNsFLNNNNmTk	1	PBANKA_0202500		P-loop containing nucleoside triphosphate hydrolase, putative	PBANKA_0202500.1-p1	0	26	S3(Phospho): 100
	hNsFLNNNNmTk	1	PBANKA_0202500		P-loop containing nucleoside triphosphate hydrolase, putative	PBANKA_0202500.1-p1	0	14	S3(Phospho): 100
	hNsFLNNNNmTk	1	PBANKA_0202500		P-loop containing nucleoside triphosphate hydrolase, putative	PBANKA_0202500.1-p1	0	14	S3(Phospho): 100
HNSFLNNNNMTK	1xTMT6plex [K12]; 1xTMT6plex [N-Term]; 1xPhospho [S3(100)]	2	PBANKA_0202500		P-loop containing nucleoside triphosphate hydrolase, putative	0	0.31	0.16	0.28	0.09	0.21	1	1	1	1	1		27
	Annotated Sequence	# Proteins	Master Protein Accessions			Protein Accessions	# Missed Cleavages	Ions Score	ptmRS: Best Site Probabilities
	hNsFLNNNNMTk	1	PBANKA_0202500		P-loop containing nucleoside triphosphate hydrolase, putative	PBANKA_0202500.1-p1	0	27	S3(Phospho): 100
	hNsFLNNNNMTk	1	PBANKA_0202500		P-loop containing nucleoside triphosphate hydrolase, putative	PBANKA_0202500.1-p1	0	23	S3(Phospho): 100
NQSSNILLDHIIPQTK	1xTMT6plex [K16]; 1xTMT6plex [N-Term]; 1xPhospho [S/T]	2	PBANKA_0202500		P-loop containing nucleoside triphosphate hydrolase, putative	0	-0.15	0.16	0.18	0.06	0.17	1	1	1	1	1		35
	Annotated Sequence	# Proteins	Master Protein Accessions			Protein Accessions	# Missed Cleavages	Ions Score	ptmRS: Best Site Probabilities
	nQSsNILLDHIIPQTk	1	PBANKA_0202500		P-loop containing nucleoside triphosphate hydrolase, putative	PBANKA_0202500.1-p1	0	35	S3(Phospho): 50; S4(Phospho): 50
	nQSsNILLDHIIPQTk	1	PBANKA_0202500		P-loop containing nucleoside triphosphate hydrolase, putative	PBANKA_0202500.1-p1	0	31	S3(Phospho): 50; S4(Phospho): 50
MPTENVNFVEK	1xTMT6plex [K11]; 1xTMT6plex [N-Term]; 1xPhospho [T3(100)]	1	PBANKA_0202500		P-loop containing nucleoside triphosphate hydrolase, putative	0	0.16	0.25	0.17	-0.15	0.65							21
	Annotated Sequence	# Proteins	Master Protein Accessions			Protein Accessions	# Missed Cleavages	Ions Score	ptmRS: Best Site Probabilities
	mPtENVNFVEk	1	PBANKA_0202500		P-loop containing nucleoside triphosphate hydrolase, putative	PBANKA_0202500.1-p1	0	21	T3(Phospho): 100
SITNQNLNKHNSFLNNNNMTK	2xTMT6plex [K9; K21]; 1xTMT6plex [N-Term]; 1xPhospho [S12(100)]	1	PBANKA_0202500		P-loop containing nucleoside triphosphate hydrolase, putative	1	-0.05	0.41	0.27	0.26	0.34							18
	Annotated Sequence	# Proteins	Master Protein Accessions			Protein Accessions	# Missed Cleavages	Ions Score	ptmRS: Best Site Probabilities
	sITNQNLNkHNsFLNNNNMTk	1	PBANKA_0202500		P-loop containing nucleoside triphosphate hydrolase, putative	PBANKA_0202500.1-p1	1	18	S12(Phospho): 100
YKTQYYDENK	2xTMT6plex [K2; K10]; 1xTMT6plex [N-Term]; 1xPhospho [T3(100)]	1	PBANKA_0202700		kinesin-8, putative	1	0.14	0.06	0.39	0.48	0.05							17
	Annotated Sequence	# Proteins	Master Protein Accessions			Protein Accessions	# Missed Cleavages	Ions Score	ptmRS: Best Site Probabilities
	yktQYYDENk	1	PBANKA_0202700		kinesin-8, putative	PBANKA_0202700.1-p1	1	17	T3(Phospho): 100
TQYYDENKLSPLYK	2xTMT6plex [K8; K14]; 1xTMT6plex [N-Term]; 1xPhospho [S10(100)]	2	PBANKA_0202700		kinesin-8, putative	1	-0.39	-0.61	-0.44	-0.36	-0.35	1	1	1	1	1		27
	Annotated Sequence	# Proteins	Master Protein Accessions			Protein Accessions	# Missed Cleavages	Ions Score	ptmRS: Best Site Probabilities
	tQYYDENkLsPLYk	1	PBANKA_0202700		kinesin-8, putative	PBANKA_0202700.1-p1	1	27	S10(Phospho): 100
	tQYYDENkLsPLYk	1	PBANKA_0202700		kinesin-8, putative	PBANKA_0202700.1-p1	1	24	S10(Phospho): 100
YSSFESDVQASK	1xTMT6plex [K12]; 1xTMT6plex [N-Term]; 2xPhospho [S/Y]	1	PBANKA_0202700		kinesin-8, putative	0											No Quan Values	16
	Annotated Sequence	# Proteins	Master Protein Accessions			Protein Accessions	# Missed Cleavages	Ions Score	ptmRS: Best Site Probabilities
	ySSFEsDVQASk	1	PBANKA_0202700		kinesin-8, putative	PBANKA_0202700.1-p1	0	16	S2(Phospho): 66.67; S3(Phospho): 66.67; S6(Phospho): 66.67
NESIKSFK	2xTMT6plex [K5; K8]; 1xTMT6plex [N-Term]; 1xPhospho [S3(100)]	1	PBANKA_0202700		kinesin-8, putative	1	-0.12	-0.24	-0.16	-0.19	-0.23							15
	Annotated Sequence	# Proteins	Master Protein Accessions			Protein Accessions	# Missed Cleavages	Ions Score	ptmRS: Best Site Probabilities
	nEsIkSFk	1	PBANKA_0202700		kinesin-8, putative	PBANKA_0202700.1-p1	1	15	S3(Phospho): 100
THHFIISESNSTNYDYYDSVK	1xTMT6plex [K21]; 1xTMT6plex [N-Term]; 1xPhospho [S7(98)]	1	PBANKA_0202700		kinesin-8, putative	0	-0.35	-0.28	-0.36	-0.44	-0.01							31
	Annotated Sequence	# Proteins	Master Protein Accessions			Protein Accessions	# Missed Cleavages	Ions Score	ptmRS: Best Site Probabilities
	tHHFIISESNSTNyDYYDSVk	1	PBANKA_0202700		kinesin-8, putative	PBANKA_0202700.1-p1	0	31	S7(Phospho): 98
YTNSIEHQNMMNAHNEDLSTYQK	1xTMT6plex [K23]; 1xTMT6plex [N-Term]; 1xPhospho [S4(99.1)]	1	PBANKA_0202700		kinesin-8, putative	0	-0.31	-0.24	-0.18	-0.34	-0.03							24
	Annotated Sequence	# Proteins	Master Protein Accessions			Protein Accessions	# Missed Cleavages	Ions Score	ptmRS: Best Site Probabilities
	yTNsIEHQNMMNAHNEDLSTYQk	1	PBANKA_0202700		kinesin-8, putative	PBANKA_0202700.1-p1	0	24	S4(Phospho): 99.13
RDVLPDLSLER	1xTMT6plex [N-Term]; 1xPhospho [S8(100)]	1	PBANKA_0202700		kinesin-8, putative	1	-0.16	0.11	0.17	-0.37	-0.46							35
	Annotated Sequence	# Proteins	Master Protein Accessions			Protein Accessions	# Missed Cleavages	Ions Score	ptmRS: Best Site Probabilities
	rDVLPDLsLER	1	PBANKA_0202700		kinesin-8, putative	PBANKA_0202700.1-p1	1	35	S8(Phospho): 100
YSSFESDVQASK	1xTMT6plex [K12]; 1xTMT6plex [N-Term]; 1xPhospho [S3(100)]	4	PBANKA_0202700		kinesin-8, putative	0	-0.45	-0.34	-0.24	-0.35	-0.21	1	1	1	1	1		40
	Annotated Sequence	# Proteins	Master Protein Accessions			Protein Accessions	# Missed Cleavages	Ions Score	ptmRS: Best Site Probabilities
	ySsFESDVQASk	1	PBANKA_0202700		kinesin-8, putative	PBANKA_0202700.1-p1	0	40	S3(Phospho): 100
	ySsFESDVQASk	1	PBANKA_0202700		kinesin-8, putative	PBANKA_0202700.1-p1	0	39	S3(Phospho): 100
	ySsFESDVQASk	1	PBANKA_0202700		kinesin-8, putative	PBANKA_0202700.1-p1	0	29	S3(Phospho): 99.69
	ySsFESDVQASk	1	PBANKA_0202700		kinesin-8, putative	PBANKA_0202700.1-p1	0	18	S3(Phospho): 99.67
TQEPTDANR	1xTMT6plex [N-Term]	1	PBANKA_0202700		kinesin-8, putative	0	-0.09	0.27	0.26	0.59	1.24							14
	Annotated Sequence	# Proteins	Master Protein Accessions			Protein Accessions	# Missed Cleavages	Ions Score	ptmRS: Best Site Probabilities
	tQEPTDANR	1	PBANKA_0202700		kinesin-8, putative	PBANKA_0202700.1-p1	0	14
ENNYSLER	1xTMT6plex [N-Term]; 1xPhospho [S5(100)]	2	PBANKA_0202700		kinesin-8, putative	0	0.25	0.35	0.56	0.46	0.4	1	1	1	1	1		23
	Annotated Sequence	# Proteins	Master Protein Accessions			Protein Accessions	# Missed Cleavages	Ions Score	ptmRS: Best Site Probabilities
	eNNYsLER	1	PBANKA_0202700		kinesin-8, putative	PBANKA_0202700.1-p1	0	23	S5(Phospho): 100
	eNNYsLER	1	PBANKA_0202700		kinesin-8, putative	PBANKA_0202700.1-p1	0	22	S5(Phospho): 100
NLSSSGIPSRYSSFESDVQASK	1xTMT6plex [K22]; 1xTMT6plex [N-Term]; 2xPhospho [S13(99.6); S/Y]	4	PBANKA_0202700		kinesin-8, putative	1	-0.67	-0.19	-0.37	-0.34	-0.27							19
	Annotated Sequence	# Proteins	Master Protein Accessions			Protein Accessions	# Missed Cleavages	Ions Score	ptmRS: Best Site Probabilities
	nLSSSGIPSRYssFESDVQASk	1	PBANKA_0202700		kinesin-8, putative	PBANKA_0202700.1-p1	1	19	S12(Phospho): 98.94; S13(Phospho): 98.94
	nLSSSGIPSRYssFESDVQASk	1	PBANKA_0202700		kinesin-8, putative	PBANKA_0202700.1-p1	1	19	S9(Phospho): 99.11; S13(Phospho): 99.1
	nLSSSGIPSRYssFESDVQASk	1	PBANKA_0202700		kinesin-8, putative	PBANKA_0202700.1-p1	1	16	S9(Phospho): 50.23; S12(Phospho): 50.23; S13(Phospho): 99.55
	nLSSSGIPSRYSsFEsDVQASk	1	PBANKA_0202700		kinesin-8, putative	PBANKA_0202700.1-p1	1	15	S9(Phospho): 66.66; S12(Phospho): 66.66; S13(Phospho): 66.66
QNSLNGFTPK	1xTMT6plex [K10]; 1xTMT6plex [N-Term]; 1xPhospho [S3(100)]	3	PBANKA_0202700		kinesin-8, putative	0	0.02	0.01	-0.07	-0.26	0.04	1	1	1	1	1		26
	Annotated Sequence	# Proteins	Master Protein Accessions			Protein Accessions	# Missed Cleavages	Ions Score	ptmRS: Best Site Probabilities
	qNsLNGFTPk	1	PBANKA_0202700		kinesin-8, putative	PBANKA_0202700.1-p1	0	26	S3(Phospho): 100
	qNsLNGFTPk	1	PBANKA_0202700		kinesin-8, putative	PBANKA_0202700.1-p1	0	25	S3(Phospho): 100
	qNsLNGFTPk	1	PBANKA_0202700		kinesin-8, putative	PBANKA_0202700.1-p1	0	24	S3(Phospho): 100
SDILDNEEYNLQEHSNNSCYEKNESIK	1xCarbamidomethyl [C19]; 2xTMT6plex [K22; K27]; 1xTMT6plex [N-Term]; 1xPhospho [S25(100)]	2	PBANKA_0202700		kinesin-8, putative	1	-0.23	-0.25	-0.14	-0.23	-0.24	1	1	1	1	1		53
	Annotated Sequence	# Proteins	Master Protein Accessions			Protein Accessions	# Missed Cleavages	Ions Score	ptmRS: Best Site Probabilities
	sDILDNEEYNLQEHSNNScYEkNEsIk	1	PBANKA_0202700		kinesin-8, putative	PBANKA_0202700.1-p1	1	53	S25(Phospho): 100
	sDILDNEEYNLQEHSNNScYEkNEsIk	1	PBANKA_0202700		kinesin-8, putative	PBANKA_0202700.1-p1	1	50	S25(Phospho): 100
SDVEYTDQESDNNNSCK	1xCarbamidomethyl [C16]; 1xTMT6plex [K17]; 1xTMT6plex [N-Term]; 1xPhospho [S10(100)]	2	PBANKA_0202700		kinesin-8, putative	0	0.07	-0.1	-0.27	-0.27	-0.2	1	1	1	1	1		48
	Annotated Sequence	# Proteins	Master Protein Accessions			Protein Accessions	# Missed Cleavages	Ions Score	ptmRS: Best Site Probabilities
	sDVEYTDQEsDNNNSck	1	PBANKA_0202700		kinesin-8, putative	PBANKA_0202700.1-p1	0	48	S10(Phospho): 100
	sDVEYTDQEsDNNNSck	1	PBANKA_0202700		kinesin-8, putative	PBANKA_0202700.1-p1	0	41	S10(Phospho): 100
DYQNNNNYYYTDKEIDIHSPYAR	1xTMT6plex [K13]; 1xTMT6plex [N-Term]; 1xPhospho [T11(100)]	3	PBANKA_0202700		kinesin-8, putative	1	-0.28	-0.26	-0.58	-0.37	-0.75							35
	Annotated Sequence	# Proteins	Master Protein Accessions			Protein Accessions	# Missed Cleavages	Ions Score	ptmRS: Best Site Probabilities
	dYQNNNNYYYtDkEIDIHSPYAR	1	PBANKA_0202700		kinesin-8, putative	PBANKA_0202700.1-p1	1	35	T11(Phospho): 100
	dYQNNNNyYYTDkEIDIHSPYAR	1	PBANKA_0202700		kinesin-8, putative	PBANKA_0202700.1-p1	1	19	T11(Phospho): 99.99
	dYQNNNNYYYTDkEIDIHsPYAR	1	PBANKA_0202700		kinesin-8, putative	PBANKA_0202700.1-p1	1	16	S19(Phospho): 100
STIYNYIHKDSFPNYEYDDTETK	2xTMT6plex [K9; K23]; 1xTMT6plex [N-Term]; 1xPhospho [S11(100)]	7	PBANKA_0202700		kinesin-8, putative	1	-0.06	-0.16	-0.23	-0.08	0.02	1	1	1	1	1		58
	Annotated Sequence	# Proteins	Master Protein Accessions			Protein Accessions	# Missed Cleavages	Ions Score	ptmRS: Best Site Probabilities
	sTIYNYIHkDsFPNYEYDDTETk	1	PBANKA_0202700		kinesin-8, putative	PBANKA_0202700.1-p1	1	58	S11(Phospho): 100
	sTIYNYIHkDsFPNYEYDDTETk	1	PBANKA_0202700		kinesin-8, putative	PBANKA_0202700.1-p1	1	58	S11(Phospho): 100
	sTIYNYIHkDsFPNYEYDDTETk	1	PBANKA_0202700		kinesin-8, putative	PBANKA_0202700.1-p1	1	51	S11(Phospho): 100
	sTIYNYIHkDSFPNyEYDDTETk	1	PBANKA_0202700		kinesin-8, putative	PBANKA_0202700.1-p1	1	46	S11(Phospho): 50; Y15(Phospho): 50
	sTIYNYIHkDsFPNYEYDDTETk	1	PBANKA_0202700		kinesin-8, putative	PBANKA_0202700.1-p1	1	37	S11(Phospho): 100
	sTIYNYIHkDsFPNYEYDDTETk	1	PBANKA_0202700		kinesin-8, putative	PBANKA_0202700.1-p1	1	33	S11(Phospho): 99.99
	sTIYNYIHkDSFPNYEYDDtETk	1	PBANKA_0202700		kinesin-8, putative	PBANKA_0202700.1-p1	1	16	S11(Phospho): 99.97
NVVTSNSVVVK	1xTMT6plex [K11]; 1xTMT6plex [N-Term]; 1xPhospho [S7(100)]	1	PBANKA_0202700		kinesin-8, putative	0	0.29	0.51	0.49	0.61	0.3							38
	Annotated Sequence	# Proteins	Master Protein Accessions			Protein Accessions	# Missed Cleavages	Ions Score	ptmRS: Best Site Probabilities
	nVVTSNsVVVk	1	PBANKA_0202700		kinesin-8, putative	PBANKA_0202700.1-p1	0	38	S7(Phospho): 100
LNSNGDNHLINLK	1xTMT6plex [K13]; 1xTMT6plex [N-Term]; 1xPhospho [S3(100)]	2	PBANKA_0202700		kinesin-8, putative	0	-0.45	-0.44	-0.31	-0.45	-0.41	1	1	1	1	1		25
	Annotated Sequence	# Proteins	Master Protein Accessions			Protein Accessions	# Missed Cleavages	Ions Score	ptmRS: Best Site Probabilities
	lNsNGDNHLINLk	1	PBANKA_0202700		kinesin-8, putative	PBANKA_0202700.1-p1	0	25	S3(Phospho): 100
	lNsNGDNHLINLk	1	PBANKA_0202700		kinesin-8, putative	PBANKA_0202700.1-p1	0	14	S3(Phospho): 100
YFSNNSTYK	1xTMT6plex [K9]; 1xTMT6plex [N-Term]; 1xPhospho [S3(100)]	3	PBANKA_0202700		kinesin-8, putative	0	-0.42	0.02	0.1	-0.28	-0.1	1	1	1	1	1		31
	Annotated Sequence	# Proteins	Master Protein Accessions			Protein Accessions	# Missed Cleavages	Ions Score	ptmRS: Best Site Probabilities
	yFsNNSTYk	1	PBANKA_0202700		kinesin-8, putative	PBANKA_0202700.1-p1	0	31	S3(Phospho): 100
	yFsNNSTYk	1	PBANKA_0202700		kinesin-8, putative	PBANKA_0202700.1-p1	0	29	S3(Phospho): 100
	yFsNNSTYk	1	PBANKA_0202700		kinesin-8, putative	PBANKA_0202700.1-p1	0	28	S3(Phospho): 100
VGETSDIWLENNLTSTTFIK	1xTMT6plex [K20]; 1xTMT6plex [N-Term]; 1xPhospho [S15(99)]	2	PBANKA_0202900		transcription initiation factor TFIIB, putative	0	0.03	-0.17	-0.18	-0.15	-0.6							52
	Annotated Sequence	# Proteins	Master Protein Accessions			Protein Accessions	# Missed Cleavages	Ions Score	ptmRS: Best Site Probabilities
	vGETSDIWLENNLTsTTFIk	1	PBANKA_0202900		transcription initiation factor TFIIB, putative	PBANKA_0202900.1-p1	0	52	S15(Phospho): 98.99
	vGETSDIWLENNLTStTFIk	1	PBANKA_0202900		transcription initiation factor TFIIB, putative	PBANKA_0202900.1-p1	0	50	S15(Phospho): 99.12
NLFLSPSFGK	1xTMT6plex [K10]; 1xTMT6plex [N-Term]; 1xPhospho [S7(100)]	2	PBANKA_0202900		transcription initiation factor TFIIB, putative	0	-0.43	-0.08	-0.27	-0.14	-0.11							29
	Annotated Sequence	# Proteins	Master Protein Accessions			Protein Accessions	# Missed Cleavages	Ions Score	ptmRS: Best Site Probabilities
	nLFLSPsFGk	1	PBANKA_0202900		transcription initiation factor TFIIB, putative	PBANKA_0202900.1-p1	0	29	S7(Phospho): 100
	nLFLSPsFGk	1	PBANKA_0202900		transcription initiation factor TFIIB, putative	PBANKA_0202900.1-p1	0	25	S7(Phospho): 100
SNALDEACLELSEEPTNEEIMKEEVENVETQFANWK	1xCarbamidomethyl [C8]; 2xTMT6plex [K22; K36]; 1xTMT6plex [N-Term]; 1xPhospho [S1(100)]	1	PBANKA_0203000		chromatin assembly factor 1 protein WD4 domain, putative	1											No Quan Values	15
	Annotated Sequence	# Proteins	Master Protein Accessions			Protein Accessions	# Missed Cleavages	Ions Score	ptmRS: Best Site Probabilities
	sNALDEAcLELSEEPTNEEIMkEEVENVETQFANWk	1	PBANKA_0203000		chromatin assembly factor 1 protein WD4 domain, putative	PBANKA_0203000.1-p1	1	15	S1(Phospho): 100
AIDGNLHLFDINKHSIDDTTNSDSR	1xTMT6plex [K13]; 1xTMT6plex [N-Term]; 1xPhospho [S15(100)]	1	PBANKA_0203000		chromatin assembly factor 1 protein WD4 domain, putative	1	-0.03	-0.06	-0.33	0.1	-0.14							23
	Annotated Sequence	# Proteins	Master Protein Accessions			Protein Accessions	# Missed Cleavages	Ions Score	ptmRS: Best Site Probabilities
	aIDGNLHLFDINkHsIDDTTNSDSR	1	PBANKA_0203000		chromatin assembly factor 1 protein WD4 domain, putative	PBANKA_0203000.1-p1	1	23	S15(Phospho): 100
INESYEGFDFCPEK	1xCarbamidomethyl [C11]; 1xTMT6plex [K14]; 1xTMT6plex [N-Term]; 1xPhospho [S4(100)]	2	PBANKA_0203000		chromatin assembly factor 1 protein WD4 domain, putative	0	-0.22	-0.18	0.12	-0.07	-0.27							52
	Annotated Sequence	# Proteins	Master Protein Accessions			Protein Accessions	# Missed Cleavages	Ions Score	ptmRS: Best Site Probabilities
	iNEsYEGFDFcPEk	1	PBANKA_0203000		chromatin assembly factor 1 protein WD4 domain, putative	PBANKA_0203000.1-p1	0	52	S4(Phospho): 100
	iNEsYEGFDFcPEk	1	PBANKA_0203000		chromatin assembly factor 1 protein WD4 domain, putative	PBANKA_0203000.1-p1	0	30	S4(Phospho): 100
TNSGLLYDFVCR	1xCarbamidomethyl [C11]; 1xTMT6plex [N-Term]; 1xPhospho [S3(100)]	4	PBANKA_0203000		chromatin assembly factor 1 protein WD4 domain, putative	0	-0.65	-0.24	-0.28	-0.45	-0.73	1	1	1	1	1		63
	Annotated Sequence	# Proteins	Master Protein Accessions			Protein Accessions	# Missed Cleavages	Ions Score	ptmRS: Best Site Probabilities
	tNsGLLYDFVcR	1	PBANKA_0203000		chromatin assembly factor 1 protein WD4 domain, putative	PBANKA_0203000.1-p1	0	63	S3(Phospho): 99.76
	tNsGLLYDFVcR	1	PBANKA_0203000		chromatin assembly factor 1 protein WD4 domain, putative	PBANKA_0203000.1-p1	0	52	S3(Phospho): 100
	tNsGLLYDFVcR	1	PBANKA_0203000		chromatin assembly factor 1 protein WD4 domain, putative	PBANKA_0203000.1-p1	0	51	S3(Phospho): 100
	tNsGLLYDFVcR	1	PBANKA_0203000		chromatin assembly factor 1 protein WD4 domain, putative	PBANKA_0203000.1-p1	0	49	S3(Phospho): 99.82
MFIGSTAEDNTLQFWQLK	1xTMT6plex [K18]; 1xTMT6plex [N-Term]; 1xPhospho [S5(99.6)]	2	PBANKA_0203000		chromatin assembly factor 1 protein WD4 domain, putative	0	-0.54	-0.15	-0.39	-0.11	-0.87							48
	Annotated Sequence	# Proteins	Master Protein Accessions			Protein Accessions	# Missed Cleavages	Ions Score	ptmRS: Best Site Probabilities
	mFIGsTAEDNTLQFWQLk	1	PBANKA_0203000		chromatin assembly factor 1 protein WD4 domain, putative	PBANKA_0203000.1-p1	0	48	S5(Phospho): 99.54
	mFIGsTAEDNTLQFWQLk	1	PBANKA_0203000		chromatin assembly factor 1 protein WD4 domain, putative	PBANKA_0203000.1-p1	0	46	S5(Phospho): 99.64
TELLDEENTVSTSNTDVE	1xTMT6plex [N-Term]; 1xPhospho [T9(100)]	23	PBANKA_0203000		chromatin assembly factor 1 protein WD4 domain, putative	0	-0.09	-0.13	-0.2	-0.16	-0.19	1	1	1	1	1		83
	Annotated Sequence	# Proteins	Master Protein Accessions			Protein Accessions	# Missed Cleavages	Ions Score	ptmRS: Best Site Probabilities
	tELLDEENtVSTSNTDVE	1	PBANKA_0203000		chromatin assembly factor 1 protein WD4 domain, putative	PBANKA_0203000.1-p1	0	83	T9(Phospho): 98.01
	tELLDEENtVSTSNTDVE	1	PBANKA_0203000		chromatin assembly factor 1 protein WD4 domain, putative	PBANKA_0203000.1-p1	0	79	T9(Phospho): 99.99
	tELLDEENtVSTSNTDVE	1	PBANKA_0203000		chromatin assembly factor 1 protein WD4 domain, putative	PBANKA_0203000.1-p1	0	63	T9(Phospho): 98.96
	tELLDEENtVSTSNTDVE	1	PBANKA_0203000		chromatin assembly factor 1 protein WD4 domain, putative	PBANKA_0203000.1-p1	0	61	T9(Phospho): 100
	tELLDEENtVSTSNTDVE	1	PBANKA_0203000		chromatin assembly factor 1 protein WD4 domain, putative	PBANKA_0203000.1-p1	0	60	T9(Phospho): 100
	tELLDEENtVSTSNTDVE	1	PBANKA_0203000		chromatin assembly factor 1 protein WD4 domain, putative	PBANKA_0203000.1-p1	0	59	T9(Phospho): 50; T15(Phospho): 50
	tELLDEENtVSTSNTDVE	1	PBANKA_0203000		chromatin assembly factor 1 protein WD4 domain, putative	PBANKA_0203000.1-p1	0	59	T9(Phospho): 97.59
	tELLDEENTVSTSNtDVE	1	PBANKA_0203000		chromatin assembly factor 1 protein WD4 domain, putative	PBANKA_0203000.1-p1	0	55	T9(Phospho): 99.98
	tELLDEENtVSTSNTDVE	1	PBANKA_0203000		chromatin assembly factor 1 protein WD4 domain, putative	PBANKA_0203000.1-p1	0	52	T9(Phospho): 100
	tELLDEENtVSTSNTDVE	1	PBANKA_0203000		chromatin assembly factor 1 protein WD4 domain, putative	PBANKA_0203000.1-p1	0	52	T9(Phospho): 49.28; T15(Phospho): 49.28
	tELLDEENtVSTSNTDVE	1	PBANKA_0203000		chromatin assembly factor 1 protein WD4 domain, putative	PBANKA_0203000.1-p1	0	50	T9(Phospho): 20; S11(Phospho): 20; T12(Phospho): 20; S13(Phospho): 20; T15(Phospho): 20
	tELLDEENtVSTSNTDVE	1	PBANKA_0203000		chromatin assembly factor 1 protein WD4 domain, putative	PBANKA_0203000.1-p1	0	50	T9(Phospho): 20; S11(Phospho): 20; T12(Phospho): 20; S13(Phospho): 20; T15(Phospho): 20
	tELLDEENTVSTSNtDVE	1	PBANKA_0203000		chromatin assembly factor 1 protein WD4 domain, putative	PBANKA_0203000.1-p1	0	50	T9(Phospho): 99.98
	tELLDEENtVSTSNTDVE	1	PBANKA_0203000		chromatin assembly factor 1 protein WD4 domain, putative	PBANKA_0203000.1-p1	0	45	T9(Phospho): 99.97
	tELLDEENtVSTSNTDVE	1	PBANKA_0203000		chromatin assembly factor 1 protein WD4 domain, putative	PBANKA_0203000.1-p1	0	45	S11(Phospho): 96.93
	tELLDEENtVSTSNTDVE	1	PBANKA_0203000		chromatin assembly factor 1 protein WD4 domain, putative	PBANKA_0203000.1-p1	0	44	T9(Phospho): 97.67
	tELLDEENtVSTSNTDVE	1	PBANKA_0203000		chromatin assembly factor 1 protein WD4 domain, putative	PBANKA_0203000.1-p1	0	37	T9(Phospho): 99.99
	tELLDEENtVSTSNTDVE	1	PBANKA_0203000		chromatin assembly factor 1 protein WD4 domain, putative	PBANKA_0203000.1-p1	0	37	T9(Phospho): 49.58; T15(Phospho): 49.58
	tELLDEENtVSTSNTDVE	1	PBANKA_0203000		chromatin assembly factor 1 protein WD4 domain, putative	PBANKA_0203000.1-p1	0	35	T9(Phospho): 24.94; T12(Phospho): 24.94; S13(Phospho): 24.94; T15(Phospho): 24.94
	tELLDEENTVSTSNtDVE	1	PBANKA_0203000		chromatin assembly factor 1 protein WD4 domain, putative	PBANKA_0203000.1-p1	0	35	T9(Phospho): 99.97
	tELLDEENtVSTSNTDVE	1	PBANKA_0203000		chromatin assembly factor 1 protein WD4 domain, putative	PBANKA_0203000.1-p1	0	32	T9(Phospho): 96.77
	tELLDEENTVSTSNtDVE	1	PBANKA_0203000		chromatin assembly factor 1 protein WD4 domain, putative	PBANKA_0203000.1-p1	0	30	T9(Phospho): 96.89
	tELLDEENTVSTSNtDVE	1	PBANKA_0203000		chromatin assembly factor 1 protein WD4 domain, putative	PBANKA_0203000.1-p1	0	27	T9(Phospho): 96.47
TELLDEENTVSTSNTDVE	2xPhospho [T9(100); S/T]; 1xTMT6plex [N-Term]	9	PBANKA_0203000		chromatin assembly factor 1 protein WD4 domain, putative	0	-0.07	0.21	0.07	0.04	-0.25							68
	Annotated Sequence	# Proteins	Master Protein Accessions			Protein Accessions	# Missed Cleavages	Ions Score	ptmRS: Best Site Probabilities
	tELLDEENtVSTSNtDVE	1	PBANKA_0203000		chromatin assembly factor 1 protein WD4 domain, putative	PBANKA_0203000.1-p1	0	68	T9(Phospho): 100; S11(Phospho): 25; T12(Phospho): 25; S13(Phospho): 25; T15(Phospho): 25
	tELLDEENtVSTSNtDVE	1	PBANKA_0203000		chromatin assembly factor 1 protein WD4 domain, putative	PBANKA_0203000.1-p1	0	64	T9(Phospho): 99.99; S11(Phospho): 25; T12(Phospho): 25; S13(Phospho): 25; T15(Phospho): 25
	tELLDEENtVSTSNtDVE	1	PBANKA_0203000		chromatin assembly factor 1 protein WD4 domain, putative	PBANKA_0203000.1-p1	0	57	T9(Phospho): 25.38; S11(Phospho): 25.38; T12(Phospho): 25.38; S13(Phospho): 25.38; T15(Phospho): 98.5
	tELLDEENtVSTSNtDVE	1	PBANKA_0203000		chromatin assembly factor 1 protein WD4 domain, putative	PBANKA_0203000.1-p1	0	54	T9(Phospho): 49.85; S11(Phospho): 49.85; T12(Phospho): 49.85; S13(Phospho): 49.85
	tELLDEENtVSTSNtDVE	1	PBANKA_0203000		chromatin assembly factor 1 protein WD4 domain, putative	PBANKA_0203000.1-p1	0	52	T9(Phospho): 100; S11(Phospho): 25; T12(Phospho): 25; S13(Phospho): 25; T15(Phospho): 25
	tELLDEENtVSTSNtDVE	1	PBANKA_0203000		chromatin assembly factor 1 protein WD4 domain, putative	PBANKA_0203000.1-p1	0	51	T9(Phospho): 100; S11(Phospho): 25; T12(Phospho): 25; S13(Phospho): 25; T15(Phospho): 25
	tELLDEENtVSTSNtDVE	1	PBANKA_0203000		chromatin assembly factor 1 protein WD4 domain, putative	PBANKA_0203000.1-p1	0	27	T9(Phospho): 99.99; S11(Phospho): 25; T12(Phospho): 25; S13(Phospho): 25; T15(Phospho): 25
	tELLDEENtVSTSNtDVE	1	PBANKA_0203000		chromatin assembly factor 1 protein WD4 domain, putative	PBANKA_0203000.1-p1	0	26	T9(Phospho): 99.99; S11(Phospho): 25; T12(Phospho): 25; S13(Phospho): 25; T15(Phospho): 25
	tELLDEENTVSTsNtDVE	1	PBANKA_0203000		chromatin assembly factor 1 protein WD4 domain, putative	PBANKA_0203000.1-p1	0	15	T9(Phospho): 40; S11(Phospho): 40; T12(Phospho): 40; S13(Phospho): 40; T15(Phospho): 40
HSIDDTTNSDSR	1xTMT6plex [N-Term]; 1xPhospho [S9(100)]	2	PBANKA_0203000		chromatin assembly factor 1 protein WD4 domain, putative	0	-0.18	-0.28	-0.07	0.18	-0.49							55
	Annotated Sequence	# Proteins	Master Protein Accessions			Protein Accessions	# Missed Cleavages	Ions Score	ptmRS: Best Site Probabilities
	hSIDDTTNsDSR	1	PBANKA_0203000		chromatin assembly factor 1 protein WD4 domain, putative	PBANKA_0203000.1-p1	0	55	S9(Phospho): 100
	hSIDDTTNsDSR	1	PBANKA_0203000		chromatin assembly factor 1 protein WD4 domain, putative	PBANKA_0203000.1-p1	0	23	T6(Phospho): 33.33; T7(Phospho): 33.33; S9(Phospho): 33.33
LNFSPNDSSILASASNNR	1xTMT6plex [N-Term]; 1xPhospho [S15(100)]	2	PBANKA_0203000		chromatin assembly factor 1 protein WD4 domain, putative	0											No Quan Values	64
	Annotated Sequence	# Proteins	Master Protein Accessions			Protein Accessions	# Missed Cleavages	Ions Score	ptmRS: Best Site Probabilities
	lNFSPNDSSILASAsNNR	1	PBANKA_0203000		chromatin assembly factor 1 protein WD4 domain, putative	PBANKA_0203000.1-p1	0	64	S15(Phospho): 100
	lNFSPNDSSILASAsNNR	1	PBANKA_0203000		chromatin assembly factor 1 protein WD4 domain, putative	PBANKA_0203000.1-p1	0	62	S15(Phospho): 100
MFIGSTAEDNTLQFWQLK	1xTMT6plex [K18]; 1xTMT6plex [N-Term]	1	PBANKA_0203000		chromatin assembly factor 1 protein WD4 domain, putative	0	0.1	-0.02	-0.07	-0.4	-0.09							50
	Annotated Sequence	# Proteins	Master Protein Accessions			Protein Accessions	# Missed Cleavages	Ions Score	ptmRS: Best Site Probabilities
	mFIGSTAEDNTLQFWQLk	1	PBANKA_0203000		chromatin assembly factor 1 protein WD4 domain, putative	PBANKA_0203000.1-p1	0	50
YNSISQNSQK	1xTMT6plex [K10]; 1xTMT6plex [N-Term]; 1xPhospho [S3(100)]	4	PBANKA_0203100	PIP5K	phosphatidylinositol-4-phosphate 5-kinase, putative	0	0.05	-0.25	-0.28	-0.19	-0.04	1	1	1	1	1		37
	Annotated Sequence	# Proteins	Master Protein Accessions			Protein Accessions	# Missed Cleavages	Ions Score	ptmRS: Best Site Probabilities
	yNsISQNSQk	1	PBANKA_0203100	PIP5K	phosphatidylinositol-4-phosphate 5-kinase, putative	PBANKA_0203100.1-p1	0	37	S3(Phospho): 100
	yNsISQNSQk	1	PBANKA_0203100	PIP5K	phosphatidylinositol-4-phosphate 5-kinase, putative	PBANKA_0203100.1-p1	0	30	S3(Phospho): 100
	yNsISQNSQk	1	PBANKA_0203100	PIP5K	phosphatidylinositol-4-phosphate 5-kinase, putative	PBANKA_0203100.1-p1	0	29	S3(Phospho): 100
	yNsISQNSQk	1	PBANKA_0203100	PIP5K	phosphatidylinositol-4-phosphate 5-kinase, putative	PBANKA_0203100.1-p1	0	29	S3(Phospho): 100
SNYYNSSK	1xTMT6plex [K8]; 1xTMT6plex [N-Term]; 1xPhospho [S7(99.7)]	2	PBANKA_0203100	PIP5K	phosphatidylinositol-4-phosphate 5-kinase, putative	0	0.1	0	-0.04	0.08	-0.1	1	1	1	1	1		21
	Annotated Sequence	# Proteins	Master Protein Accessions			Protein Accessions	# Missed Cleavages	Ions Score	ptmRS: Best Site Probabilities
	sNYYNSsk	1	PBANKA_0203100	PIP5K	phosphatidylinositol-4-phosphate 5-kinase, putative	PBANKA_0203100.1-p1	0	21	S7(Phospho): 99.72
	sNYYNSsk	1	PBANKA_0203100	PIP5K	phosphatidylinositol-4-phosphate 5-kinase, putative	PBANKA_0203100.1-p1	0	17	S7(Phospho): 99.68
TQFLDLKSQIFDFEK	2xTMT6plex [K7; K15]; 1xTMT6plex [N-Term]; 1xPhospho [S8(100)]	2	PBANKA_0203100	PIP5K	phosphatidylinositol-4-phosphate 5-kinase, putative	1	0.32	0.58	0.96	0.54	0.68	1	1	1	1	1		18
	Annotated Sequence	# Proteins	Master Protein Accessions			Protein Accessions	# Missed Cleavages	Ions Score	ptmRS: Best Site Probabilities
	tQFLDLksQIFDFEk	1	PBANKA_0203100	PIP5K	phosphatidylinositol-4-phosphate 5-kinase, putative	PBANKA_0203100.1-p1	1	18	S8(Phospho): 100
	tQFLDLksQIFDFEk	1	PBANKA_0203100	PIP5K	phosphatidylinositol-4-phosphate 5-kinase, putative	PBANKA_0203100.1-p1	1	14	S8(Phospho): 100
KSYSESTSTR	1xTMT6plex [K1]; 1xTMT6plex [N-Term]; 1xPhospho [S4(100)]	2	PBANKA_0203100	PIP5K	phosphatidylinositol-4-phosphate 5-kinase, putative	1	-0.32	-0.49	-0.58	-0.2	-0.53							20
	Annotated Sequence	# Proteins	Master Protein Accessions			Protein Accessions	# Missed Cleavages	Ions Score	ptmRS: Best Site Probabilities
	kSYsESTSTR	1	PBANKA_0203100	PIP5K	phosphatidylinositol-4-phosphate 5-kinase, putative	PBANKA_0203100.1-p1	1	20	S4(Phospho): 100
	kSYsESTSTR	1	PBANKA_0203100	PIP5K	phosphatidylinositol-4-phosphate 5-kinase, putative	PBANKA_0203100.1-p1	1	17	S4(Phospho): 100
GTTSLFIK	1xTMT6plex [K8]; 1xTMT6plex [N-Term]; 1xPhospho [T3(100)]	1	PBANKA_0203100	PIP5K	phosphatidylinositol-4-phosphate 5-kinase, putative	0	-0.1	-0.02	0.08	-0.09	-0.09							21
	Annotated Sequence	# Proteins	Master Protein Accessions			Protein Accessions	# Missed Cleavages	Ions Score	ptmRS: Best Site Probabilities
	gTtSLFIk	1	PBANKA_0203100	PIP5K	phosphatidylinositol-4-phosphate 5-kinase, putative	PBANKA_0203100.1-p1	0	21	T3(Phospho): 100
SYSESTSTR	1xTMT6plex [N-Term]; 1xPhospho [S3(100)]	2	PBANKA_0203100	PIP5K	phosphatidylinositol-4-phosphate 5-kinase, putative	0	-0.54	-0.65	-0.75	-0.42	-0.32	1	1	1	1	1		27
	Annotated Sequence	# Proteins	Master Protein Accessions			Protein Accessions	# Missed Cleavages	Ions Score	ptmRS: Best Site Probabilities
	sYsESTSTR	1	PBANKA_0203100	PIP5K	phosphatidylinositol-4-phosphate 5-kinase, putative	PBANKA_0203100.1-p1	0	27	S3(Phospho): 100
	sYsESTSTR	1	PBANKA_0203100	PIP5K	phosphatidylinositol-4-phosphate 5-kinase, putative	PBANKA_0203100.1-p1	0	23	S3(Phospho): 100
LANLYSFQGK	1xTMT6plex [K10]; 1xTMT6plex [N-Term]; 1xPhospho [S6(100)]	4	PBANKA_0203100	PIP5K	phosphatidylinositol-4-phosphate 5-kinase, putative	0	-0.08	-0.15	-0.33	-0.06	-0.19	1	1	1	1	1		52
	Annotated Sequence	# Proteins	Master Protein Accessions			Protein Accessions	# Missed Cleavages	Ions Score	ptmRS: Best Site Probabilities
	lANLYsFQGk	1	PBANKA_0203100	PIP5K	phosphatidylinositol-4-phosphate 5-kinase, putative	PBANKA_0203100.1-p1	0	52	S6(Phospho): 100
	lANLYsFQGk	1	PBANKA_0203100	PIP5K	phosphatidylinositol-4-phosphate 5-kinase, putative	PBANKA_0203100.1-p1	0	28	S6(Phospho): 100
	lANLYsFQGk	1	PBANKA_0203100	PIP5K	phosphatidylinositol-4-phosphate 5-kinase, putative	PBANKA_0203100.1-p1	0	26	S6(Phospho): 100
	lANLYsFQGk	1	PBANKA_0203100	PIP5K	phosphatidylinositol-4-phosphate 5-kinase, putative	PBANKA_0203100.1-p1	0	26	S6(Phospho): 100
KLANLYSFQGK	2xTMT6plex [K1; K11]; 1xTMT6plex [N-Term]; 1xPhospho [S7(100)]	2	PBANKA_0203100	PIP5K	phosphatidylinositol-4-phosphate 5-kinase, putative	1	0.03	-0.06	-0.09	0.12	-0.29							63
	Annotated Sequence	# Proteins	Master Protein Accessions			Protein Accessions	# Missed Cleavages	Ions Score	ptmRS: Best Site Probabilities
	kLANLYsFQGk	1	PBANKA_0203100	PIP5K	phosphatidylinositol-4-phosphate 5-kinase, putative	PBANKA_0203100.1-p1	1	63	S7(Phospho): 100
	kLANLYsFQGk	1	PBANKA_0203100	PIP5K	phosphatidylinositol-4-phosphate 5-kinase, putative	PBANKA_0203100.1-p1	1	58	S7(Phospho): 100
GENKSPNQIASTNDILQETTR	1xTMT6plex [K4]; 1xTMT6plex [N-Term]; 1xPhospho [S5(100)]	3	PBANKA_0204200		tubulin-specific chaperone a, putative	1	-0.35	-0.39	-0.43	-0.31	-0.25	1	1	1	1	1		49
	Annotated Sequence	# Proteins	Master Protein Accessions			Protein Accessions	# Missed Cleavages	Ions Score	ptmRS: Best Site Probabilities
	gENksPNQIASTNDILQETTR	1	PBANKA_0204200		tubulin-specific chaperone a, putative	PBANKA_0204200.1-p1	1	49	S5(Phospho): 100
	gENksPNQIASTNDILQETTR	1	PBANKA_0204200		tubulin-specific chaperone a, putative	PBANKA_0204200.1-p1	1	33	S5(Phospho): 100
	gENksPNQIASTNDILQETTR	1	PBANKA_0204200		tubulin-specific chaperone a, putative	PBANKA_0204200.1-p1	1	22	S5(Phospho): 100
DMTLPICNSNITNNTVTPQEDYVEI	1xCarbamidomethyl [C7]; 1xTMT6plex [N-Term]; 1xPhospho [T17(97.2)]	1	PBANKA_0204200		tubulin-specific chaperone a, putative	0	0.18	0.02	0.03	-0.36	-0.01							43
	Annotated Sequence	# Proteins	Master Protein Accessions			Protein Accessions	# Missed Cleavages	Ions Score	ptmRS: Best Site Probabilities
	dMTLPIcNSNITNNTVTPQEDyVEI	1	PBANKA_0204200		tubulin-specific chaperone a, putative	PBANKA_0204200.1-p1	0	43	T17(Phospho): 97.16
KNEINSVK	2xTMT6plex [K1; K8]; 1xTMT6plex [N-Term]; 1xPhospho [S6(100)]	1	PBANKA_0204500	CCp5	LCCL domain-containing protein, putative	1	0.65	0.25	1.07	0.68	0.57							14
	Annotated Sequence	# Proteins	Master Protein Accessions			Protein Accessions	# Missed Cleavages	Ions Score	ptmRS: Best Site Probabilities
	kNEINsVk	1	PBANKA_0204500	CCp5	LCCL domain-containing protein, putative	PBANKA_0204500.1-p1	1	14	S6(Phospho): 100
INSMVHK	1xTMT6plex [K7]; 1xTMT6plex [N-Term]; 1xPhospho [S3(100)]	4	PBANKA_0204500	CCp5	LCCL domain-containing protein, putative	0	-0.21	-0.37	-0.04	-0.28	-0.49	1	1	1	1	1		38
	Annotated Sequence	# Proteins	Master Protein Accessions			Protein Accessions	# Missed Cleavages	Ions Score	ptmRS: Best Site Probabilities
	iNsMVHk	1	PBANKA_0204500	CCp5	LCCL domain-containing protein, putative	PBANKA_0204500.1-p1	0	38	S3(Phospho): 100
	iNsMVHk	1	PBANKA_0204500	CCp5	LCCL domain-containing protein, putative	PBANKA_0204500.1-p1	0	29	S3(Phospho): 100
	iNsMVHk	1	PBANKA_0204500	CCp5	LCCL domain-containing protein, putative	PBANKA_0204500.1-p1	0	16	S3(Phospho): 100
	iNsMVHk	1	PBANKA_0204500	CCp5	LCCL domain-containing protein, putative	PBANKA_0204500.1-p1	0	15	S3(Phospho): 100
INSMVHK	1xOxidation [M4]; 1xTMT6plex [K7]; 1xTMT6plex [N-Term]; 1xPhospho [S3(100)]	2	PBANKA_0204500	CCp5	LCCL domain-containing protein, putative	0	-0.27	-0.14	0.05	-0.02	-0.3	1	1	1	1	1		24
	Annotated Sequence	# Proteins	Master Protein Accessions			Protein Accessions	# Missed Cleavages	Ions Score	ptmRS: Best Site Probabilities
	iNsmVHk	1	PBANKA_0204500	CCp5	LCCL domain-containing protein, putative	PBANKA_0204500.1-p1	0	24	S3(Phospho): 100
	iNsmVHk	1	PBANKA_0204500	CCp5	LCCL domain-containing protein, putative	PBANKA_0204500.1-p1	0	24	S3(Phospho): 100
INSMVHKYDLLCGNK	1xCarbamidomethyl [C12]; 2xTMT6plex [K7; K15]; 1xTMT6plex [N-Term]; 1xPhospho [S3(100)]	2	PBANKA_0204500	CCp5	LCCL domain-containing protein, putative	1	-0.25	-0.05	-0.13	-0.2	0.1	1	1	1	1	1		28
	Annotated Sequence	# Proteins	Master Protein Accessions			Protein Accessions	# Missed Cleavages	Ions Score	ptmRS: Best Site Probabilities
	iNsMVHkYDLLcGNk	1	PBANKA_0204500	CCp5	LCCL domain-containing protein, putative	PBANKA_0204500.1-p1	1	28	S3(Phospho): 100
	iNsMVHkYDLLcGNk	1	PBANKA_0204500	CCp5	LCCL domain-containing protein, putative	PBANKA_0204500.1-p1	1	22	S3(Phospho): 100
VSGNISPYSTGNSEIYDAISNSK	1xTMT6plex [K23]; 1xTMT6plex [N-Term]; 1xPhospho [S13(100)]	1	PBANKA_0204800	PSOP24	secreted ookinete protein, putative	0	-0.21	-0.19	-0.1	-0.1	0.04							55
	Annotated Sequence	# Proteins	Master Protein Accessions			Protein Accessions	# Missed Cleavages	Ions Score	ptmRS: Best Site Probabilities
	vSGNISPYSTGNsEIYDAISNSk	1	PBANKA_0204800	PSOP24	secreted ookinete protein, putative	PBANKA_0204800.1-p1	0	55	S13(Phospho): 99.99
VSGNISPYSTGNSEIYDAISNSK	1xTMT6plex [K23]; 1xTMT6plex [N-Term]; 2xPhospho [S6(100); S9(98.8)]	1	PBANKA_0204800	PSOP24	secreted ookinete protein, putative	0	-0.26	0.1	-0.1	-0.25	-0.07							22
	Annotated Sequence	# Proteins	Master Protein Accessions			Protein Accessions	# Missed Cleavages	Ions Score	ptmRS: Best Site Probabilities
	vSGNIsPYsTGNSEIYDAISNSk	1	PBANKA_0204800	PSOP24	secreted ookinete protein, putative	PBANKA_0204800.1-p1	0	22	S6(Phospho): 100; S9(Phospho): 98.82
KPSIPLNENISIR	1xTMT6plex [K1]; 1xTMT6plex [N-Term]; 1xPhospho [S3(100)]	2	PBANKA_0204800	PSOP24	secreted ookinete protein, putative	0	0.04	-0.07	0.21	0.09	-0.04	1	1	1	1	1		39
	Annotated Sequence	# Proteins	Master Protein Accessions			Protein Accessions	# Missed Cleavages	Ions Score	ptmRS: Best Site Probabilities
	kPsIPLNENISIR	1	PBANKA_0204800	PSOP24	secreted ookinete protein, putative	PBANKA_0204800.1-p1	0	39	S3(Phospho): 100
	kPsIPLNENISIR	1	PBANKA_0204800	PSOP24	secreted ookinete protein, putative	PBANKA_0204800.1-p1	0	23	S3(Phospho): 100
NNEEDRQTNSPFINPYLK	1xTMT6plex [K18]; 1xTMT6plex [N-Term]; 1xPhospho [S10(100)]	1	PBANKA_0204800	PSOP24	secreted ookinete protein, putative	1											No Quan Values	18
	Annotated Sequence	# Proteins	Master Protein Accessions			Protein Accessions	# Missed Cleavages	Ions Score	ptmRS: Best Site Probabilities
	nNEEDRQTNsPFINPYLk	1	PBANKA_0204800	PSOP24	secreted ookinete protein, putative	PBANKA_0204800.1-p1	1	18	S10(Phospho): 100
NNNTNEYEEHKIHSFHLK	2xTMT6plex [K11; K18]; 1xTMT6plex [N-Term]; 1xPhospho [S14(100)]	2	PBANKA_0204800	PSOP24	secreted ookinete protein, putative	1	-0.26	-0.23	-0.11	-0.14	0.05	1	1	1	1	1		31
	Annotated Sequence	# Proteins	Master Protein Accessions			Protein Accessions	# Missed Cleavages	Ions Score	ptmRS: Best Site Probabilities
	nNNTNEYEEHkIHsFHLk	1	PBANKA_0204800	PSOP24	secreted ookinete protein, putative	PBANKA_0204800.1-p1	1	31	S14(Phospho): 100
	nNNTNEYEEHkIHsFHLk	1	PBANKA_0204800	PSOP24	secreted ookinete protein, putative	PBANKA_0204800.1-p1	1	29	S14(Phospho): 100
IHSFHLK	1xTMT6plex [K7]; 1xTMT6plex [N-Term]; 1xPhospho [S3(100)]	1	PBANKA_0204800	PSOP24	secreted ookinete protein, putative	0	-0.1	0.01	0.42	0.28	-0.27							20
	Annotated Sequence	# Proteins	Master Protein Accessions			Protein Accessions	# Missed Cleavages	Ions Score	ptmRS: Best Site Probabilities
	iHsFHLk	1	PBANKA_0204800	PSOP24	secreted ookinete protein, putative	PBANKA_0204800.1-p1	0	20	S3(Phospho): 100
IPDLIVSEENVQENKNNIIDTTSEVVDVPK	2xTMT6plex [K15; K30]; 1xTMT6plex [N-Term]; 1xPhospho [S7(100)]	1	PBANKA_0205000		conserved Plasmodium protein, unknown function	1	-0.04	-0.32	-0.25	0.14	-0.22							32
	Annotated Sequence	# Proteins	Master Protein Accessions			Protein Accessions	# Missed Cleavages	Ions Score	ptmRS: Best Site Probabilities
	iPDLIVsEENVQENkNNIIDTTSEVVDVPk	1	PBANKA_0205000		conserved Plasmodium protein, unknown function	PBANKA_0205000.1-p1	1	32	S7(Phospho): 100
IPDLIVSEENVQENK	1xTMT6plex [K15]; 1xTMT6plex [N-Term]; 1xPhospho [S7(100)]	2	PBANKA_0205000		conserved Plasmodium protein, unknown function	0	-0.03	-0.07	-0.3	-0.24	-0.22	1	1	1	1	1		75
	Annotated Sequence	# Proteins	Master Protein Accessions			Protein Accessions	# Missed Cleavages	Ions Score	ptmRS: Best Site Probabilities
	iPDLIVsEENVQENk	1	PBANKA_0205000		conserved Plasmodium protein, unknown function	PBANKA_0205000.1-p1	0	75	S7(Phospho): 100
	iPDLIVsEENVQENk	1	PBANKA_0205000		conserved Plasmodium protein, unknown function	PBANKA_0205000.1-p1	0	70	S7(Phospho): 100
NVENDKSDENMNNK	2xTMT6plex [K6; K14]; 1xTMT6plex [N-Term]; 1xPhospho [S7(100)]	4	PBANKA_0205200		conserved Plasmodium protein, unknown function	1	-0.02	-0.23	-0.39	-0.16	-0.04	1	1	1	1	1		23
	Annotated Sequence	# Proteins	Master Protein Accessions			Protein Accessions	# Missed Cleavages	Ions Score	ptmRS: Best Site Probabilities
	nVENDksDENMNNk	1	PBANKA_0205200		conserved Plasmodium protein, unknown function	PBANKA_0205200.1-p1	1	23	S7(Phospho): 100
	nVENDksDENMNNk	1	PBANKA_0205200		conserved Plasmodium protein, unknown function	PBANKA_0205200.1-p1	1	19	S7(Phospho): 100
	nVENDksDENMNNk	1	PBANKA_0205200		conserved Plasmodium protein, unknown function	PBANKA_0205200.1-p1	1	18	S7(Phospho): 100
	nVENDksDENMNNk	1	PBANKA_0205200		conserved Plasmodium protein, unknown function	PBANKA_0205200.1-p1	1	15	S7(Phospho): 100
EYPVSESIDNDKIDDLHSER	1xTMT6plex [K12]; 1xTMT6plex [N-Term]; 1xPhospho [S5(100)]	3	PBANKA_0205200		conserved Plasmodium protein, unknown function	1	0.01	-0.05	-0.24	-0.07	0.18	1	1	1	1	1		31
	Annotated Sequence	# Proteins	Master Protein Accessions			Protein Accessions	# Missed Cleavages	Ions Score	ptmRS: Best Site Probabilities
	eYPVSEsIDNDkIDDLHSER	1	PBANKA_0205200		conserved Plasmodium protein, unknown function	PBANKA_0205200.1-p1	1	31	S7(Phospho): 100
	eYPVsESIDNDkIDDLHSER	1	PBANKA_0205200		conserved Plasmodium protein, unknown function	PBANKA_0205200.1-p1	1	28	S5(Phospho): 100
	eYPVSEsIDNDkIDDLHSER	1	PBANKA_0205200		conserved Plasmodium protein, unknown function	PBANKA_0205200.1-p1	1	26	S7(Phospho): 100
SNTEISDDNKSDINDISDVTSKPVEK	3xTMT6plex [K10; K22; K26]; 1xTMT6plex [N-Term]; 1xPhospho [S6(99.4)]	4	PBANKA_0205200		conserved Plasmodium protein, unknown function	1	0.41	-0.05	-0.14	-0.01	0.19	0.630349	1	1	1	1		33
	Annotated Sequence	# Proteins	Master Protein Accessions			Protein Accessions	# Missed Cleavages	Ions Score	ptmRS: Best Site Probabilities
	sNTEIsDDNkSDINDISDVTSkPVEk	1	PBANKA_0205200		conserved Plasmodium protein, unknown function	PBANKA_0205200.1-p1	1	33	S6(Phospho): 99.36
	sNTEIsDDNkSDINDISDVTSkPVEk	1	PBANKA_0205200		conserved Plasmodium protein, unknown function	PBANKA_0205200.1-p1	1	28	S6(Phospho): 99.27
	sNTEIsDDNkSDINDISDVTSkPVEk	1	PBANKA_0205200		conserved Plasmodium protein, unknown function	PBANKA_0205200.1-p1	1	16	S6(Phospho): 99.25
	sNTEIsDDNkSDINDISDVTSkPVEk	1	PBANKA_0205200		conserved Plasmodium protein, unknown function	PBANKA_0205200.1-p1	1	14	S6(Phospho): 100
SNTEISDDNKSDINDISDVTSKPVEK	3xTMT6plex [K10; K22; K26]; 1xTMT6plex [N-Term]; 2xPhospho [S6(100); S11(100)]	2	PBANKA_0205200		conserved Plasmodium protein, unknown function	1	-0.29	-0.34	-0.37	-0.25	-0.31							14
	Annotated Sequence	# Proteins	Master Protein Accessions			Protein Accessions	# Missed Cleavages	Ions Score	ptmRS: Best Site Probabilities
	sNTEIsDDNksDINDISDVTSkPVEk	1	PBANKA_0205200		conserved Plasmodium protein, unknown function	PBANKA_0205200.1-p1	1	14	S6(Phospho): 100; S11(Phospho): 100
	sNTEIsDDNksDINDISDVTSkPVEk	1	PBANKA_0205200		conserved Plasmodium protein, unknown function	PBANKA_0205200.1-p1	1	14	S6(Phospho): 99.98; S11(Phospho): 100
FPSNELGNVILNMR	1xTMT6plex [N-Term]; 1xPhospho [S3(100)]	2	PBANKA_0205800	eIK2	eukaryotic translation initiation factor 2-alpha kinase 2	0	-0.24	-0.34	-0.34	-0.33	-0.71							41
	Annotated Sequence	# Proteins	Master Protein Accessions			Protein Accessions	# Missed Cleavages	Ions Score	ptmRS: Best Site Probabilities
	fPsNELGNVILNMR	1	PBANKA_0205800	eIK2	eukaryotic translation initiation factor 2-alpha kinase 2	PBANKA_0205800.1-p1	0	41	S3(Phospho): 100
	fPsNELGNVILNMR	1	PBANKA_0205800	eIK2	eukaryotic translation initiation factor 2-alpha kinase 2	PBANKA_0205800.1-p1	0	41	S3(Phospho): 100
SGSNTIHIR	1xTMT6plex [N-Term]; 1xPhospho [S3(100)]	4	PBANKA_0205800	eIK2	eukaryotic translation initiation factor 2-alpha kinase 2	0	-0.43	-0.64	-0.83	-0.46	-0.63	0.819641	0.0398464	0.0107248	0.327792	0.0837117		44
	Annotated Sequence	# Proteins	Master Protein Accessions			Protein Accessions	# Missed Cleavages	Ions Score	ptmRS: Best Site Probabilities
	sGsNTIHIR	1	PBANKA_0205800	eIK2	eukaryotic translation initiation factor 2-alpha kinase 2	PBANKA_0205800.1-p1	0	44	S3(Phospho): 100
	sGsNTIHIR	1	PBANKA_0205800	eIK2	eukaryotic translation initiation factor 2-alpha kinase 2	PBANKA_0205800.1-p1	0	37	S3(Phospho): 100
	sGsNTIHIR	1	PBANKA_0205800	eIK2	eukaryotic translation initiation factor 2-alpha kinase 2	PBANKA_0205800.1-p1	0	27	S3(Phospho): 100
	sGsNTIHIR	1	PBANKA_0205800	eIK2	eukaryotic translation initiation factor 2-alpha kinase 2	PBANKA_0205800.1-p1	0	20	S3(Phospho): 100
CHNLSFSQNR	1xCarbamidomethyl [C1]; 1xTMT6plex [N-Term]; 1xPhospho [S5(100)]	2	PBANKA_0205800	eIK2	eukaryotic translation initiation factor 2-alpha kinase 2	0	-0.22	-0.13	-0.25	-0.3	-0.35							29
	Annotated Sequence	# Proteins	Master Protein Accessions			Protein Accessions	# Missed Cleavages	Ions Score	ptmRS: Best Site Probabilities
	cHNLsFSQNR	1	PBANKA_0205800	eIK2	eukaryotic translation initiation factor 2-alpha kinase 2	PBANKA_0205800.1-p1	0	29	S5(Phospho): 100
	cHNLsFSQNR	1	PBANKA_0205800	eIK2	eukaryotic translation initiation factor 2-alpha kinase 2	PBANKA_0205800.1-p1	0	22	S5(Phospho): 100
FLTIPNK	1xTMT6plex [K7]; 1xTMT6plex [N-Term]; 1xPhospho [T3(100)]	4	PBANKA_0205800	eIK2	eukaryotic translation initiation factor 2-alpha kinase 2	0	0.28	0.07	0	0.08	-0.04	1	1	1	1	1		27
	Annotated Sequence	# Proteins	Master Protein Accessions			Protein Accessions	# Missed Cleavages	Ions Score	ptmRS: Best Site Probabilities
	fLtIPNk	1	PBANKA_0205800	eIK2	eukaryotic translation initiation factor 2-alpha kinase 2	PBANKA_0205800.1-p1	0	27	T3(Phospho): 100
	fLtIPNk	1	PBANKA_0205800	eIK2	eukaryotic translation initiation factor 2-alpha kinase 2	PBANKA_0205800.1-p1	0	17	T3(Phospho): 100
	fLtIPNk	1	PBANKA_0205800	eIK2	eukaryotic translation initiation factor 2-alpha kinase 2	PBANKA_0205800.1-p1	0	14	T3(Phospho): 100
	fLtIPNk	1	PBANKA_0205800	eIK2	eukaryotic translation initiation factor 2-alpha kinase 2	PBANKA_0205800.1-p1	0	13	T3(Phospho): 100
TVASDFSSNLK	1xTMT6plex [K11]; 1xTMT6plex [N-Term]; 1xPhospho [S4(100)]	4	PBANKA_0205800	eIK2	eukaryotic translation initiation factor 2-alpha kinase 2	0	-0.13	-0.44	-0.3	-0.15	-0.2	1	1	1	1	1		46
	Annotated Sequence	# Proteins	Master Protein Accessions			Protein Accessions	# Missed Cleavages	Ions Score	ptmRS: Best Site Probabilities
	tVAsDFSSNLk	1	PBANKA_0205800	eIK2	eukaryotic translation initiation factor 2-alpha kinase 2	PBANKA_0205800.1-p1	0	46	S4(Phospho): 100
	tVAsDFSSNLk	1	PBANKA_0205800	eIK2	eukaryotic translation initiation factor 2-alpha kinase 2	PBANKA_0205800.1-p1	0	44	S4(Phospho): 100
	tVAsDFSSNLk	1	PBANKA_0205800	eIK2	eukaryotic translation initiation factor 2-alpha kinase 2	PBANKA_0205800.1-p1	0	37	S4(Phospho): 100
	tVAsDFSSNLk	1	PBANKA_0205800	eIK2	eukaryotic translation initiation factor 2-alpha kinase 2	PBANKA_0205800.1-p1	0	24	S4(Phospho): 100
TEHDNSNIYSHYNINDDINRR	1xTMT6plex [N-Term]; 1xPhospho [S6(100)]	1	PBANKA_0205900	NCR1	Niemann-Pick type C1-related protein, putative	1	-0.12	0.18	0.26	0.43	0.3							20
	Annotated Sequence	# Proteins	Master Protein Accessions			Protein Accessions	# Missed Cleavages	Ions Score	ptmRS: Best Site Probabilities
	tEHDNsNIYSHYNINDDINRR	1	PBANKA_0205900	NCR1	Niemann-Pick type C1-related protein, putative	PBANKA_0205900.1-p1	1	20	S6(Phospho): 100
INNNYTSQISLEK	1xTMT6plex [K13]; 1xTMT6plex [N-Term]; 1xPhospho [S10(100)]	2	PBANKA_0205900	NCR1	Niemann-Pick type C1-related protein, putative	0	-0.14	-0.13	-0.15	-0.09	-0.44	1	1	1	1	1		63
	Annotated Sequence	# Proteins	Master Protein Accessions			Protein Accessions	# Missed Cleavages	Ions Score	ptmRS: Best Site Probabilities
	iNNNYTSQIsLEk	1	PBANKA_0205900	NCR1	Niemann-Pick type C1-related protein, putative	PBANKA_0205900.1-p1	0	63	S10(Phospho): 100
	iNNNYTSQIsLEk	1	PBANKA_0205900	NCR1	Niemann-Pick type C1-related protein, putative	PBANKA_0205900.1-p1	0	27	S10(Phospho): 100
IYMLSSHDNVLFYK	1xTMT6plex [K14]; 1xTMT6plex [N-Term]; 1xPhospho [S6(99.7)]	2	PBANKA_0205900	NCR1	Niemann-Pick type C1-related protein, putative	0	-0.09	0.11	0.02	0.06	0.09	1	1	1	1	1		42
[truncated: 22,118 more rows]

## Sheet: 15 sec
Sequence	Modifications	# PSMs	Master Protein Accessions	Protein Name	Protein Description	# Missed Cleavages	Abundance Ratio (log2): (0, KO) / (0, WT)	Abundance Ratio (log2): (15, KO) / (15, WT)	Abundance Ratio (log2): (30, KO) / (30, WT)	Abundance Ratio (log2): (45, KO) / (45, WT)	Abundance Ratio (log2): (60, KO) / (60, WT)	Abundance Ratio Adj. P-Value: (0, KO) / (0, WT)	Abundance Ratio Adj. P-Value: (15, KO) / (15, WT)	Abundance Ratio Adj. P-Value: (30, KO) / (30, WT)	Abundance Ratio Adj. P-Value: (45, KO) / (45, WT)	Abundance Ratio Adj. P-Value: (60, KO) / (60, WT)	Quan Info	Ions Score (by Search Engine): Mascot
[truncated: 22,937 more rows]

[truncated: 3 more sheets: 30 sec, 45 sec, 60 sec]
